# Supplementary material for: Long terminal repeats power evolution of genes and gene expression programs in mammalian oocytes and zygotes
Source: HighWire-hosted journal article supplement (doi:10.1101/gr.216150.116), 2017-05-18
Supplement: Supplemental_Table_S1.xlsx [file Supplemental_Table_S1.xlsx]

## Sheet: Table S1
Franke et al. Table S1 - Class III (ERVL) RepeatMasker data
RepeatMasker retrotransposon sequence ID	Type	LTR class in the article	Family	# of fragments annotated by RepeatMasker	# of fragments annotated by RepeatMasker viz	# of insertions annotated by RepeatMasker viz	consensus sequence length	# of fragments of consensus length (+/- 5% )	mean CG frequency	median CG frequency
LONG TERMINAL REPEATS
MLT1A	LTR	MLT1	ERVL	4950	4659	4027	374	242	0.00649364	0.0050826
MLT1A0	LTR	MLT1	ERVL	10413	9951	8679	365	519	0.00629159	0.00490196
MLT1A1	LTR	MLT1	ERVL	9015	8507	7601	408	155	0.00567559	0.00255102
MLT1B	LTR	MLT1	ERVL	9316	8867	7527	390	497	0.00650996	0.00520833
MLT1C	LTR	MLT1	ERVL	7791	7402	6231	467	153	0.00652273	0.00507614
MLT1D	LTR	MLT1	ERVL	8368	7866	6540	505	153	0.00644901	0.00510204
MLT1E	LTR	MLT1	ERVL	534	509	400	653	1	0.00651594	0.00470591
MLT1E1	LTR	MLT1	ERVL	576	542	454	654	0	0.00683566	0.00520164
MLT1E1A	LTR	MLT1	ERVL	1154	1088	907	680	4	0.00593265	0.0046404
MLT1E2	LTR	MLT1	ERVL	1821	1718	1426	627	9	0.00622575	0.00465839
MLT1E3	LTR	MLT1	ERVL	1020	965	793	624	11	0.00650796	0.00500013
MLT1F	LTR	MLT1	ERVL	1561	1472	1237	548	14	0.00748594	0.00630915
MLT1F1	LTR	MLT1	ERVL	1608	1531	1250	569	9	0.00729528	0.00576374
MLT1F2	LTR	MLT1	ERVL	2297	2164	1803	560	55	0.0070681	0.00581395
MLT1G	LTR	MLT1	ERVL	896	836	709	591	6	0.00771651	0.00628931
MLT1G1	LTR	MLT1	ERVL	1080	996	872	579	4	0.00686527	0.00547205
MLT1G3	LTR	MLT1	ERVL	1075	1000	872	595	3	0.00760068	0.00625
MLT1H	LTR	MLT1	ERVL	2322	2170	1925	549	4	0.00690766	0.00553251
MLT1H1	LTR	MLT1	ERVL	1001	941	803	555	5	0.00698908	0.00537634
MLT1H2	LTR	MLT1	ERVL	1034	955	851	489	13	0.00710482	0.00583095
MLT1I	LTR	MLT1	ERVL	1777	1639	1531	411	17	0.00776984	0.00626959
MLT1J	LTR	MLT1	ERVL	2943	2683	2464	512	5	0.00718889	0.00581395
MLT1J1	LTR	MLT1	ERVL	1135	1062	981	444	4	0.00657312	0.00490196
MLT1J2	LTR	MLT1	ERVL	1110	989	911	448	4	0.00677397	0.00537634
MLT1K	LTR	MLT1	ERVL	2759	2498	2312	595	3	0.00753757	0.00591716
MLT1L	LTR	MLT1	ERVL	1535	1371	1285	610	0	0.00710447	0.00540541
MLT1M	LTR	MLT1	ERVL	212	184	182	672	0	0.00901458	0.00731725
MLT1N2	LTR	MLT1	ERVL	692	617	585	562	2	0.00653999	0.00546464
MLT1O	LTR	MLT1	ERVL	538	467	456	542	3	0.00705825	0.00493219
MLT2B1	LTR	MLT2	ERVL	1637	1574	1316	520	32	0.00616401	0.00473934
MLT2B2	LTR	MLT2	ERVL	1351	1282	1063	515	35	0.00571583	0.00423729
MLT2B3	LTR	MLT2	ERVL	1483	1387	1214	554	65	0.0062129	0.0045045
MLT2B4	LTR	MLT2	ERVL	1871	1800	1540	556	8	0.0057071	0.00425532
MLT2B5	LTR	MLT2	ERVL	442	406	369	601	5	0.00582564	0.00317464
MLT2C1	LTR	MLT2	ERVL	872	834	746	397	29	0.00594118	0.00409
MLT2C2	LTR	MLT2	ERVL	651	625	550	464	11	0.0060497	0.00367647
MLT2D	LTR	MLT2	ERVL	1567	1509	1292	414	56	0.00581962	0.00421941
MLT2E	LTR	MLT2	ERVL	126	115	108	628	0	0.00617179	0.0042463
MLT2F	LTR	MLT2	ERVL	574	515	442	663	2	0.00647256	0.0052356
MT2_Mm	LTR	MT2	ERVL	2667	2665	2044	493	1929	0.0116086	0.01222
MT2A	LTR	MT2A	ERVL	10140	9886	8102	533	423	0.00574256	0.0041841
MT2B	LTR	MT2B	ERVL	13977	13107	12474	601	386	0.006812	0
MT2B1	LTR	MT2B	ERVL	7248	7163	5093	521	380	0.00440585	0.00238949
MT2B2	LTR	MT2B	ERVL	3655	3414	3232	584	397	0.00593512	0
MT2C_Mm	LTR	MT2C	ERVL	1982	1978	1815	475	1001	0.00417602	0.00352113
MTA_Mm	LTR	MTA	ERVL	15623	15617	13249	396	13406	0.00255917	0.00253807
MTB	LTR	MTB	ERVL	6419	6406	5764	400	3992	0.00289259	0.00251889
MTB_Mm	LTR	MTB2	ERVL	4963	4947	4382	407	2364	0.00405292	0.00257069
MTC	LTR	MTC	ERVL	27489	27383	22002	421	5220	0.00508331	0.00331126
MTD	LTR	MTD	ERVL	51544	51128	42222	419	4256	0.00604465	0.00503778
MTEa	LTR	MTE	ERVL	20061	19661	16647	379	1960	0.00790676	0.00625
MTEb	LTR	MTE	ERVL	10811	10566	8829	379	776	0.00773774	0.00600601
MTE2a	LTR	MTE2	ERVL	15148	14944	12590	379	2891	0.00657612	0.00525625
MTE2b	LTR	MTE2	ERVL	14367	14153	11781	379	1538	0.00723769	0.00568182
ORR1A0	LTR	ORR1A	ERVL	2133	2131	1798	346	1672	0.00247376	0.00289017
ORR1A1	LTR	ORR1A	ERVL	4414	4409	3823	346	2110	0.00292074	0.00289855
ORR1A2	LTR	ORR1A	ERVL	14843	14833	13021	327	7555	0.00357232	0.00308642
ORR1A3	LTR	ORR1A	ERVL	4381	4373	3855	326	1798	0.0039386	0.00306748
ORR1A4	LTR	ORR1A	ERVL	7791	7784	6848	329	2995	0.00420107	0.00307692
ORR1B1	LTR	ORR1B	ERVL	17313	17276	15119	394	3263	0.00477296	0.0031348
ORR1B2	LTR	ORR1B	ERVL	8528	8498	7248	367	1834	0.00523513	0.00348432
ORR1C1	LTR	ORR1C	ERVL	7423	7402	5991	378	1838	0.00518594	0.003367
ORR1C2	LTR	ORR1C	ERVL	12473	12421	9258	384	1677	0.00517345	0.00324675
ORR1D1	LTR	ORR1D	ERVL	21507	21341	16491	374	2956	0.00551338	0.00438596
ORR1D2	LTR	ORR1D	ERVL	15061	14917	12604	370	2091	0.00683128	0.00557103
ORR1E	LTR	ORR1E	ERVL	22742	22253	19394	359	3537	0.00720495	0.00589971
ORR1F	LTR	ORR1F	ERVL	23086	22100	19239	391	770	0.00673505	0.00546448
ORR1G	LTR	ORR1G	ERVL	4680	4395	3950	348	325	0.00618655	0.0046729
LTR101_Mam	LTR	other	ERVL	157	139	130	829	0	0.00648593	0.0052356
LTR102_Mam	LTR	other	ERVL	215	200	150	851	0	0.006854	0.00512821
LTR105_Mam	LTR	other	ERVL	124	109	103	600	1	0.00721181	0.00568255
LTR108a_Mam	LTR	other	ERVL	39	37	34	511	0	0.00699882	0.00478469
LTR108b_Mam	LTR	other	ERVL	19	19	18	497	0	0.00496616	0.00331126
LTR108c_Mam	LTR	other	ERVL	15	14	13	519	0	0.00596557	0.00320513
LTR108d_Mam	LTR	other	ERVL	30	28	27	544	0	0.00611297	0.00423534
LTR108e_Mam	LTR	other	ERVL	36	33	31	548	1	0.00480861	0.00279378
LTR16A	LTR	other	ERVL	1472	1365	1270	451	11	0.00661842	0.00508909
LTR16A1	LTR	other	ERVL	654	607	568	456	9	0.00661508	0.00518149
LTR16B	LTR	other	ERVL	260	232	216	463	5	0.00653986	0.00523618
LTR16B1	LTR	other	ERVL	299	271	253	480	5	0.00709547	0.00555556
LTR16B2	LTR	other	ERVL	384	355	331	462	12	0.00679818	0.00522197
LTR16C	LTR	other	ERVL	1352	1216	1133	489	10	0.00694296	0.00561798
LTR16D	LTR	other	ERVL	185	162	149	651	0	0.00721835	0.00626305
LTR16D1	LTR	other	ERVL	90	86	77	675	0	0.00675839	0.00373246
LTR16D2	LTR	other	ERVL	65	58	52	572	0	0.00728153	0.00607903
LTR16E1	LTR	other	ERVL	514	457	431	538	3	0.00675769	0.00507614
LTR16E2	LTR	other	ERVL	423	374	343	568	1	0.00710896	0.00490196
LTR32	LTR	other	ERVL	9	0	0	471	0	0.00198849	0
LTR33	LTR	other	ERVL	1466	1253	1180	515	7	0.00687257	0.00564176
LTR33A	LTR	other	ERVL	504	438	410	520	1	0.00690771	0.00589976
LTR33A_	LTR	other	ERVL	474	426	391	531	0	0.00686289	0.0056499
LTR33B	LTR	other	ERVL	268	240	225	503	3	0.00688262	0.00492095
LTR33C	LTR	other	ERVL	232	218	198	629	0	0.00775683	0.00579715
LTR40a	LTR	other	ERVL	709	670	587	519	17	0.00631489	0.00516796
LTR40A1	LTR	other	ERVL	114	101	89	584	0	0.00550152	0.00380316
LTR40b	LTR	other	ERVL	577	556	490	462	17	0.00665121	0.00560224
LTR40c	LTR	other	ERVL	248	238	206	465	6	0.00818748	0.0059702
LTR41	LTR	other	ERVL	506	473	377	768	3	0.00731216	0.00571429
LTR41B	LTR	other	ERVL	290	271	226	758	4	0.0073065	0.00593477
LTR50	LTR	other	ERVL	549	498	446	795	0	0.00651033	0.00480769
LTR52	LTR	other	ERVL	230	215	194	421	3	0.00539805	0.00351521
LTR53	LTR	other	ERVL	226	216	184	519	4	0.00619114	0.00508909
LTR53B	LTR	other	ERVL	83	74	65	533	3	0.00627397	0.00571429
LTR69	LTR	other	ERVL	74	70	54	588	1	0.00598981	0.00456113
LTR75	LTR	other	ERVL	94	89	82	562	0	0.00770686	0.00687683
LTR75B	LTR	other	ERVL	69	67	59	608	1	0.0129842	0.00728155
LTR79	LTR	other	ERVL	380	329	315	527	0	0.00669792	0.00570615
LTR80A	LTR	other	ERVL	112	97	93	583	1	0.00497618	0.00382621
LTR80B	LTR	other	ERVL	116	104	97	584	1	0.00491693	0.00359262
LTR83	LTR	other	ERVL	161	143	129	780	0	0.0049197	0
LTR84a	LTR	other	ERVL	136	127	113	757	0	0.00579588	0.00476585
LTR84b	LTR	other	ERVL	187	163	150	761	0	0.00669362	0.0047619
LTR86A1	LTR	other	ERVL	92	82	74	513	0	0.00697827	0.00502513
LTR86A2	LTR	other	ERVL	79	68	64	508	0	0.00511501	0
LTR86B1	LTR	other	ERVL	49	45	41	493	0	0.00753962	0.00613497
LTR86B2	LTR	other	ERVL	36	29	29	487	0	0.00740921	0.00521187
LTR86C	LTR	other	ERVL	75	63	59	621	1	0.00768642	0.00746269
LTR91	LTR	other	ERVL	57	52	52	199	3	0.00719278	0.00549451
MER21B	LTR	other	ERVL	1618	1550	1127	868	4	0.00697922	0.00552486
MER21C	LTR	other	ERVL	2261	2168	1585	938	5	0.00669994	0.00534759
MER54A	LTR	other	ERVL	273	252	203	901	0	0.0059208	0.00512821
MER54B	LTR	other	ERVL	114	106	82	793	1	0.00812856	0.00615857
MER68	LTR	other	ERVL	637	607	510	563	14	0.00756137	0.00606061
MER68B	LTR	other	ERVL	237	221	182	564	2	0.00652371	0.00529101
MER68C	LTR	other	ERVL	60	57	53	419	0	0.00640655	0.00702455
MER70A	LTR	other	ERVL	184	176	155	472	12	0.00598981	0.00444944
MER70B	LTR	other	ERVL	254	242	216	578	0	0.00601656	0.00477395
MER73	LTR	other	ERVL	135	125	97	644	2	0.00596239	0.00458716
MER74A	LTR	other	ERVL	731	700	590	558	11	0.00623113	0.00505051
MER74B	LTR	other	ERVL	324	306	267	622	1	0.00641141	0.00470653
MER74C	LTR	other	ERVL	114	104	96	460	3	0.00580375	0.00426899
MER76	LTR	other	ERVL	247	224	188	691	1	0.00616544	0.00462963
MER77	LTR	other	ERVL	570	539	448	604	9	0.00651445	0.00558659
MER77B	LTR	other	ERVL	505	473	395	700	0	0.00582357	0.00458716
MER88	LTR	other	ERVL	58	53	45	464	2	0.00513251	0.00277457
MLTR11A	LTR	other	ERVL	2124	2110	1763	563	112	0.00769955	0.0062435
MLTR11B	LTR	other	ERVL	2985	2956	2506	482	202	0.00771053	0.00647249
MLTR12	LTR	other	ERVL	477	473	370	494	21	0.00576551	0.00461894
MLTR13	LTR	other	ERVL	205	191	161	1282	9	0.00560384	0.003663
MLTR14	LTR	other	ERVL	6798	6598	5377	543	162	0.0062928	0.00504414
MLTR18_MM	LTR	other	ERVL	427	426	363	581	26	0.0082544	0.00630252
MLTR18A_MM	LTR	other	ERVL	299	291	245	611	54	0.00524296	0.00389105
MLTR18B_MM	LTR	other	ERVL	468	467	366	635	53	0.00637059	0.00518135
MLTR18C_MM	LTR	other	ERVL	468	467	383	700	81	0.0059055	0.00450789
MLTR18D_MM	LTR	other	ERVL	620	618	519	640	98	0.0056095	0.0047619
MLTR25A	LTR	other	ERVL	2168	2122	1564	1106	101	0.0050965	0.00345821
MLTR25C	LTR	other	ERVL	504	487	334	1424	10	0.00557402	0.00388853
MLTR31A_MM	LTR	other	ERVL	352	349	294	583	102	0.00956024	0.00856899
MLTR31C_MM	LTR	other	ERVL	227	223	194	617	23	0.0125155	0.0113636
MLTR31D_MM	LTR	other	ERVL	318	315	285	581	61	0.00718063	0.00660095
MLTR31E_MM	LTR	other	ERVL	164	161	140	566	30	0.00940254	0.00837719
MLTR31F_MM	LTR	other	ERVL	403	401	333	548	72	0.0105175	0.00909091
MLTR31FA_MM	LTR	other	ERVL	525	524	464	576	113	0.0104184	0.00897666
MLTR32C_MM	LTR	other	ERVL	127	126	112	616	12	0.00493216	0.00294985
MLTR73	LTR	other	ERVL	956	895	813	548	6	0.0074067	0.00625652
RLTR28	LTR	other	ERVL	1949	1943	1633	524	528	0.00504732	0.004
RLTR28B	LTR	other	ERVL	428	424	338	481	68	0.00560963	0.00419728
RLTR35B_MM	LTR	other	ERVL	492	490	398	479	9	0.00533088	0.00436206
RMER10A	LTR	other	ERVL	4464	4298	3748	442	660	0.00593715	0.00471698
RMER10B	LTR	other	ERVL	3002	2974	2499	398	435	0.00579134	0.00456621
RMER15	LTR	other	ERVL	18077	17441	14384	575	602	0.00584871	0.00411523
INTERNAL SEQUENCES
MERVL_2A-int	int		ERVL	3899	3863	2071	5761	1	0.0038541	0.00241255
MERVL-int	int		ERVL	2600	2588	1541	5485	585	0.00619776	0.00584795
ERVL-B4-int	int		ERVL	1384	1304	671	5714	0	0.00524872	0.00404654
ERVL-E-int	int		ERVL	1044	921	630	5667	0	0.006412	0.00489603
ERVL-int	int		ERVL	721	681	354	5757	0	0.00555709	0.00404858
HERVL32-int	int		ERVL	1	1	1	3418	0	0.00806452	0.00806452
HERVL40-int	int		ERVL	204	161	105	5530	0	0.00446173	0.00286128
HERVL74-int	int		ERVL	149	142	73	5685	0	0.00449379	0.00289017
MER21-int	int		ERVL	105	95	61	4191	0	0.00545739	0.00395257
MER68-int	int		ERVL	77	73	37	2990	0	0.0063316	0.00395257
MER70-int	int		ERVL	56	53	33	5023	0	0.00495224	0.00299851
RMER15-int	int		ERVL	3100	2898	1299	4999	0	0.00619262	0.0046729
MLT1A0-int	int		ERVL	206	201	125	1735	0	0.00612061	0.00483481
MLT1A1-int	int		ERVL	130	127	74	1735	1	0.00607098	0.00415802
MLT1A-int	int		ERVL	123	121	82	1735	0	0.00460444	0.00323625
MLT1B-int	int		ERVL	165	157	112	1371	0	0.00551319	0.00425532
MLT1C-int	int		ERVL	122	120	74	1371	0	0.00499712	0.00257435
MLT1D-int	int		ERVL	176	173	112	1371	2	0.00683038	0.00531494
MLT1E1A-int	int		ERVL	28	26	14	1489	0	0.00467879	0.00422693
MLT1E1-int	int		ERVL	8	8	6	1489	0	0.00555038	0.004641
MLT1E2-int	int		ERVL	35	33	27	1489	0	0.00352293	0
MLT1E3-int	int		ERVL	12	11	8	1489	0	0.00720678	0.0056499
MLT1E-int	int		ERVL	9	9	6	1489	0	0.00503307	0.00185874
MLT1F1-int	int		ERVL	89	85	44	1489	1	0.0074423	0.0060423
MLT1F2-int	int		ERVL	68	67	42	1489	0	0.00570757	0.00421408
MLT1F-int	int		ERVL	417	392	283	1489	0	0.00550616	0.00404858
MLT1G1-int	int		ERVL	51	50	36	1489	0	0.00554861	0.00431655
MLT1G3-int	int		ERVL	58	56	36	1489	0	0.00637514	0.00425004
MLT1G-int	int		ERVL	39	37	23	1489	0	0.00382319	0.00265957
MLT1H1-int	int		ERVL	49	48	28	1409	0	0.00594656	0.00389105
MLT1H2-int	int		ERVL	53	51	33	1409	0	0.00634488	0.00561798
MLT1H-int	int		ERVL	379	358	273	1409	0	0.00542424	0.00408163
MLT1I-int	int		ERVL	57	52	40	1387	0	0.0077491	0.00641026
MLT1-int	int		ERVL	285	270	205	1371	0	0.00462288	0.00280112
MLT1J1-int	int		ERVL	67	66	44	1387	0	0.00606226	0.00465839
MLT1J2-int	int		ERVL	27	26	21	1387	0	0.00535896	0.00403226
MLT1J-int	int		ERVL	506	449	379	1387	1	0.00590621	0.00494239
MLT1K-int	int		ERVL	8	8	8	1387	0	0.00714047	0.00664155
MLT1L-int	int		ERVL	13	13	8	1387	0	0.00646816	0.00581395
MLT1N2-int	int		ERVL	3	3	3	1387	0	0.00586081	0
MLT1O-int	int		ERVL	2	2	1	1387	0	0.00645161	0.00645161
MLT-int	int		ERVL	846	811	557	1735	0	0.00565143	0.00404449
MTA_Mm-int	int		ERVL	3027	3025	2710	1098	1869	0.00517689	0.00545951
MTB_Mm-int	int		ERVL	379	379	281	1258	11	0.00393455	0.00301811
MTB-int	int		ERVL	592	592	456	1098	117	0.00368684	0.00282354
MTC-int	int		ERVL	3520	3494	2455	1258	102	0.00537552	0.00408163
MTD-int	int		ERVL	2521	2505	1612	1258	60	0.00533264	0.0041841
MTE2a-int	int		ERVL	795	791	517	1580	1	0.00383912	0.00282087
MTE2b-int	int		ERVL	729	724	402	1580	5	0.00540811	0.00421941
MTEa-int	int		ERVL	1368	1355	741	1580	12	0.0061698	0.00506714
MTEb-int	int		ERVL	635	627	351	1580	8	0.00585866	0.00480769
MTE-int	int		ERVL	4958	4854	3283	1580	4	0.00571829	0.0043181
MT-int	int		ERVL	438	434	387	1098	6	0.00527195	0.00461286
ORR1A0-int	int		ERVL	456	455	389	1792	223	0.00282861	0.0027933
ORR1A1-int	int		ERVL	859	853	711	1792	204	0.0033194	0.0027907
ORR1A2-int	int		ERVL	2132	2131	1579	1963	128	0.00356645	0.00305344
ORR1A3-int	int		ERVL	2435	2433	2130	1963	51	0.0167602	0.00510204
ORR1A4-int	int		ERVL	1326	1324	938	1963	73	0.00357275	0.00302001
ORR1B1-int	int		ERVL	2964	2697	2003	1509	74	0.00586305	0.00287715
ORR1B2-int	int		ERVL	857	854	524	1509	40	0.00540862	0.00351124
ORR1C1-int	int		ERVL	783	781	515	1509	16	0.00468091	0.00371747
ORR1C2-int	int		ERVL	914	910	588	1370	55	0.00461118	0.00371402
ORR1D1-int	int		ERVL	1715	1709	1073	1370	70	0.00506786	0.00364964
ORR1D2-int	int		ERVL	1361	1353	811	1370	34	0.00478686	0.00314465
ORR1D-int	int		ERVL	878	865	728	1370	2	0.0046777	0.00403769
ORR1E-int	int		ERVL	1446	1425	842	1580	14	0.00610874	0.00511291
ORR1F-int	int		ERVL	395	383	218	1580	3	0.00660128	0.00445765
ORR1G-int	int		ERVL	70	69	38	1580	0	0.00627005	0.00425218
