# Supplementary material for: Long terminal repeats power evolution of genes and gene expression programs in mammalian oocytes and zygotes
Source: HighWire-hosted journal article supplement (doi:10.1101/gr.216150.116), 2017-05-18
Supplement: Supplemental_Table_S2.xlsx [file Supplemental_Table_S2.xlsx]

## Sheet: Sheet 1
Franke et al. Table S2 - Annotation of class III (ERVL) LTR exaptations in Mus musculus
genome coordinates	LTR group	exaptation type	full / partial	host gene	gene biotype	GV oocyte [LTR FPKM]	MII egg [LTR FPKM]	1-cell [LTR FPKM]	2-cell [LTR FPKM]	4-cell [LTR FPKM]	morula [LTR FPKM]	blastocyst [LTR FPKM]
chr6:100397585-100397925	MLT1	3' exon	full	TCONS_00085518	lincRNA	1.2046	0.7532	0.3858	0	0	0	0
chr2:116853181-116853437	MLT1	3' exon	full	TCONS_00061591	lincRNA	10.0578	4.1013	0.9336	0	0	0	0
chr9:41632902-41633253	MLT1	3' exon	full	TCONS_00105745	lincRNA	0.3941	0.7392	0.2104	0	0.2003	0	0
chr14:26790434-26790789	MLT1	3' exon	full	TCONS_00034363	lincRNA	2.2421	0.9346	0.3419	0	0	0	0
chr12:91735010-91735471	MLT1	3' exon	full	Ston2	protein_coding	1.1059	1.4751	1.8101	1.7432	0.0749	0.0657	0
chrX:111450251-111450834	MLT1	3' exon	full	Rps6ka6	protein_coding	20.775	17.1083	13.5226	12.5802	6.6961	2.2582	0.3859
chr4:7305077-7305556	MLT1	3' exon	full	TCONS_00069218	lincRNA	0	0.2268	0.1291	0	0	0	0
chrX:73514415-73514774	MLT1	3' exon	full	TCONS_00112038	lincRNA	0.0903	0.1695	0.0804	0.0534	0	0	0
chr15:62249153-62249400	MLT1	3' exon	full	Pvt1	lincRNA	1.4399	1.559	1.0309	0.1661	0.1071	0.1096	0.107
chr4:82265295-82265648	MLT1	3' exon	partial	TCONS_00070523	lincRNA	0.0398	0.0995	0.1487	0.0235	0	0	0
chr17:64440577-64440768	MLT1	3' exon	partial	TCONS_00048645	lincRNA	0.9274	1.0928	0.7044	0.0843	0	0	0
chr11:43253467-43253802	MLT1	3' exon	partial	TCONS_00018462	lincRNA	0.1935	0.121	0.0516	0	0.0492	0	0
chr16:10563386-10563499	MLT1	3' exon	partial	Clec16a	protein_coding	1.1364	1.1627	0.9925	1.7099	0.4201	0.4604	0.4721
chr4:63460293-63460590	MLT1	3' exon	partial	Whrn	protein_coding	0.628	0.9162	0.3352	0.3712	0.3192	0.7463	0.2391
chr13:3881700-3881791	MLT1	3' exon	partial	lncRNA-OET-13-112	lincRNA	0.7699	1.0369	1.3909	0	0.2408	0	0.0902
chr2:73561367-73561540	MLT1	3' exon	partial	Chrna1	protein_coding	0.3116	0.2923	0.298	0.1305	0.0066	0.0579	0.2027
chr5:22432267-22432582	MLT1	3' exon	partial	TCONS_00076657	lincRNA	0	0	0	0	0	0	0
chr11:102029942-102030045	MLT1	3' exon	partial	TCONS_00020324	lincRNA	0.3982	0.332	0.4959	0	0	0	0
chr18:23549027-23549395	MLT1	3' exon	partial	Dtna	protein_coding	0.0376	0	0.2007	0	0	0	0
chr7:37120416-37120762	MLT1	3' exon	partial	TCONS_00093776	lincRNA	2.2772	2.7269	2.9245	1.1177	0.0842	0	0
chr18:77760387-77760453	MLT1	3' exon	partial	TCONS_00050749	lincRNA	3.9054	2.9727	1.8126	1.2045	1.0356	1.9675	1.1639
chr16:95841839-95841945	MLT1	3' exon	partial	lncRNA-OET-16-076	lincRNA	3.6314	4.4355	1.7129	0.0998	0	0	0.0643
chr11:7833194-7833559	MLT1	3' exon	partial	TCONS_00017711	lincRNA	0.1132	0.1416	0.1209	0.0446	0.0384	0	0
chr9:51391679-51391901	MLT1	3' exon	partial	TCONS_00106017	lincRNA	0.1481	0.3333	0.4109	0	0	0	0
chr17:4496868-4496953	MLT1	3' exon	partial	TCONS_00044607	lincRNA	0.2731	0.1931	0	0	0	0	0
chr19:4742852-4743204	MLT1	3' exon	partial	Rbm14	protein_coding	0.115	0.2465	0.1754	0.6021	1.3361	0.6883	0.1502
chr2:14548908-14549208	MLT1	3' exon	partial	TCONS_00059579	lincRNA	0.2441	0.0763	0.114	0	0	0	0
chr2:72208385-72208506	MLT1	3' exon	partial	Rapgef4	protein_coding	0.3628	0.4536	0.6777	0.1072	0	0	0
chr8:34355975-34356058	MLT1	3' exon	partial	TCONS_00100002	lincRNA	0.0694	0.2171	0.2038	0	0	0	0
chr13:48363493-48363606	MLT1	3' exon	partial	TCONS_00029646	lincRNA	0.1279	0.3428	0.2146	0.108	0.0186	0	0
chr14:100865285-100865388	MLT1	3' exon	partial	TCONS_00033529	lincRNA	0.0701	0.482	0.2244	0	0	0	0
chr16:66149637-66149766	MLT1	3' exon	partial	TCONS_00042059	lincRNA	0	0.0348	0.0445	0	0	0	0
chr8:26274369-26274631	MLT1	3' exon	partial	lncRNA-OET-08-075	lincRNA	1.9808	2.1898	1.808	0.2376	0.0875	0	0.0219
chr7:37123964-37124219	MLT1	3' exon	partial	Gm28078	lincRNA	0.6928	1.3329	1.024	0.063	0	0	0
chr14:20367648-20368027	MLT1	3' exon	partial	Fam149b	protein_coding	0.578	1.112	1.4713	0.3154	0.0904	0.1189	0.237
chr3:102147736-102147891	MLT1	3' exon	partial	Casq2	protein_coding	0.4727	0.8868	0.996	0.2059	0.0253	0.0111	0.0379
chr3:20775295-20775594	MLT1	3' exon	partial	TCONS_00066604	lincRNA	0.0482	0.4824	0.2574	0	0	0	0
chr12:106095978-106096195	MLT1	3' exon	partial	TCONS_00025623	lincRNA	1.0073	1.518	0.9925	0.3664	0	0.023	0.118
chr16:91156996-91157277	MLT1	3' exon	partial	TCONS_00044283	lincRNA	0.049	0.1071	0.0915	0.0145	0	0.0109	0.1398
chr4:13362137-13362282	MLT1	3' exon	partial	lncRNA-OET-04-454	lincRNA	0.5485	1.3718	0.9368	0	0	0	0
chr7:13360665-13360805	MLT1	3' exon	partial	Pla2g4c	protein_coding	67.8355	65.7543	74.4288	5.5039	0.5234	0.1147	0.098
chr1:89356379-89356736	MLT1	3' exon	partial	TCONS_00005884	lincRNA	0.4512	0.7053	0.6623	0.0667	0.172	0	0
chr14:66308245-66308336	MLT1	3' exon	partial	Trim35	protein_coding	0.3284	0.4107	0.2805	0.233	0	0	0.05
chr4:115533077-115533323	MLT1	3' exon	partial	Cyp4a10	protein_coding	0.1856	0.0774	0.1321	0	0	0	0
chr15:92046015-92046424	MLT1	3' exon	partial	TCONS_00037874	lincRNA	0.0721	0.0451	0.077	0	0.0733	0	0
chr11:54862876-54863251	MLT1	3' exon	partial	Hint1	protein_coding	2.2874	2.6718	2.6296	0.3863	0.0256	0	0
chr9:123523952-123524139	MLT1	3' exon	partial	Limd1	protein_coding	1.9429	1.6814	1.6276	1.4984	0.1897	0.0631	0.2401
chr5:123007987-123008362	MLT1	3' exon	partial	Kdm2b	protein_coding	15.5628	20.1433	14.6428	0.2976	0.0853	0	0
chr6:111759900-111760039	MLT1	3' exon	partial	TCONS_00088327	lincRNA	0.1832	0.177	0.2222	0.0394	0	0	0
chr10:119419673-119420037	MLT1	3' exon	partial	TCONS_00013864	lincRNA	1.4026	1.6874	1.194	0.3149	0.0541	0.0633	0
chr1:16691844-16692050	MLT1	3' exon	partial	Ly96	protein_coding	0.3628	0.6048	0.1291	0	0.9833	1.0778	0.3684
chr10:89649483-89649792	MLT1	3' exon	partial	Scyl2	protein_coding	21.442	9.3786	10.9826	8.4121	1.8571	0.4285	0.5858
chr8:124510192-124510526	MLT1	3' exon	partial	TCONS_00101836	lincRNA	0.165	0.2063	0.2055	0.13	0	0	0
chr2:59821361-59821517	MLT1	3' exon	partial	Tanc1	protein_coding	2.0104	1.4269	0.9861	0.2248	0.2209	0	0.4138
chr12:111013158-111013343	MLT1	3' exon	partial	TCONS_00023417	lincRNA	0.2827	0.0643	0.1097	0.0304	0.0261	0	0.0392
chr9:29558750-29559089	MLT1	3' exon	partial	TCONS_00102530	lincRNA	0.4699	0.6072	0.4515	0.0741	0	0	0
chr11:29801845-29802311	MLT1	3' exon	partial	Eml6	protein_coding	1.2343	0.7717	0.2994	0.398	0	0.1	0
chrX:153068842-153069157	MLT1	3' exon	partial	lncRNA-OET-0X-428	lincRNA	0.7477	0.5754	0.6754	0	0	0	0
chr1:191076865-191077001	MLT1	3' exon	partial	Nsl1	protein_coding	0.0988	0.1236	0	0	0	0.1762	0.2258
chr7:24450438-24450581	MLT1	3' exon	partial	Irgc1	protein_coding	3.9991	2.1056	0.5243	0.0829	0	0.0625	0
chr9:99754954-99755437	MLT1	3' exon	partial	TCONS_00106995	lincRNA	0.0168	0	0.018	0.3977	0.0171	0	0.0128
chr2:126709781-126709997	MLT1	3' exon	partial	Usp50	protein_coding	11.65	14.6643	2.7409	7.2944	11.9595	3.4841	1.6928
chr6:56341680-56341792	MLT1	3' exon	partial	Pde1c	protein_coding	0.0095	0.0119	0.0202	0.0112	0	0	0
chr5:41039192-41039360	MLT1	3' exon	partial	TCONS_00077234	lincRNA	0.1727	0.096	0.1229	0	0	0	0
chr18:31153105-31153324	MLT1	3' exon	partial	Rit2	protein_coding	1.0709	0.7652	0.871	0	0	0	0
chr18:38971527-38971719	MLT1	3' exon	partial	Arhgap26	protein_coding	0.8876	1.0723	1.3329	0.3735	0	0	0
chr18:38933888-38934026	MLT1	3' exon	partial	Arhgap26	protein_coding	0.7424	1.3925	1.3869	0.4388	0	0	0
chr6:99918236-99918434	MLT1	3' exon	partial	TCONS_00085511	lincRNA	0.416	0.5444	0.5989	0.2745	0	0	0.0074
chr17:84021316-84021636	MLT1	3' exon	partial	TCONS_00049065	lincRNA	0.0771	0.1156	0.074	0.0091	0.0078	0	0.0059
chr13:98608829-98608936	MLT1	3' exon	partial	TCONS_00030986	lincRNA	0.2824	0.3838	0.3211	0.0073	0.0062	0	0
chr3:56347679-56347883	MLT1	3' exon	partial	TCONS_00067229	lincRNA	0.0933	0.05	0.0427	0	0	0	0
chr10:119591393-119591605	MLT1	3' exon	partial	TCONS_00010691	lincRNA	0.0479	0.03	0.0128	0.0142	0	0.0107	0.0091
chr1:70786116-70786555	MLT1	3' exon	partial	lncRNA-OET-01-479	lincRNA	1.2207	1.8319	1.1077	0.1082	0.062	0	0
chr7:83178510-83178865	MLT1	3' exon	partial	TCONS_00091207	lincRNA	1.9076	1.8986	1.787	0.4603	0	0.0347	0
chr5:43378849-43378991	MLT1	3' exon	partial	Gm43699	lincRNA	0.2956	0.308	0.4733	0	0	0	0
chr3:103522292-103522606	MLT1	3' exon	partial	TCONS_00068207	lincRNA	1.6224	2.1385	1.6851	0.1037	0.0446	0	0
chr15:6129185-6129466	MLT1	3' exon	partial	TCONS_00038382	lincRNA	0.0271	0.0339	0.0724	0.016	0	0	0
chr4:87592761-87592863	MLT1	3' exon	partial	TCONS_00074187	lincRNA	0.2089	0.2613	0.0446	0	0	0	0
chr2:155068505-155068626	MLT1	3' exon	partial	Ahcy	protein_coding	4.2986	4.0536	1.2036	0.1666	0.8596	1.4447	1.9858
chr5:147079004-147079128	MLT1	3' exon	partial	Polr1d	protein_coding	17.1179	17.5732	6.2968	8.6147	15.8137	8.2475	4.5365
chr3:152101796-152101907	MLT1	3' exon	partial	Gipc2	protein_coding	2.0072	2.51	1.0301	0.0913	0	0.0688	0.1764
chr7:128310358-128310508	MLT1	3' exon	partial	TCONS_00095596	lincRNA	1.4709	1.3535	1.7849	0.3363	0.0353	0	0
chr15:35307197-35307433	MLT1	3' exon	partial	lncRNA-OET-15-237	lincRNA	6.4771	8.6781	3.6217	0	0	0	0
chr11:4768131-4768279	MLT1	3' exon	partial	Nf2	protein_coding	9.2486	8.0834	4.8833	8.9355	7.6829	1.7728	1.8935
chr14:63179461-63179590	MLT1	5' exon	full	Fdft1	protein_coding	0.7117	1.8434	1.8992	0	0	0	0
chr8:31491851-31492183	MLT1	5' exon	full	TCONS_00096750	lincRNA	0.0731	0.0915	0.0703	0	0.0074	0	0
chr16:95528916-95529111	MLT1	5' exon	full	Erg	protein_coding	0	1.2475	0	0	0	0	0
chr5:116870696-116870852	MLT1	5' exon	full	TCONS_00082523	lincRNA	0.6515	0.8147	0.4173	0	0	0	0
chr16:58514084-58514337	MLT1	5' exon	full	St3gal6	protein_coding	0.3522	0.3579	0.2115	0.0521	0	0.0589	0.1677
chr4:100729505-100729827	MLT1	5' exon	full	TCONS_00070804	lincRNA	0	1.6808	0.3587	0	0	0	0
chr15:60922842-60923228	MLT1	5' exon	full	A1bg	protein_coding	0	1.1791	0.2876	0	0	0	0
chr9:97064537-97064941	MLT1	5' exon	full	Gm19325	lincRNA	0.0234	0.0146	0.0125	0.1523	0.1429	0.0104	0.0446
chr19:56009023-56009231	MLT1	5' exon	full	TCONS_00055347	lincRNA	0	0.4094	0.8738	0.1935	0	0	0
chr6:107277148-107277657	MLT1	5' exon	full	lncRNA-OET-06-165	lincRNA	7.6556	9.9347	10.1768	0.8539	0	0	0
chr12:24854640-24855110	MLT1	5' exon	full	Mboat2	protein_coding	2.1282	0.8871	0	0	0.7211	1.8969	2.1611
chr15:69319603-69319732	MLT1	5' exon	full	TCONS_00037164	lincRNA	1.6287	0.8147	1.3909	0	0	0	0
chr12:105899642-105900036	MLT1	5' exon	full	lncRNA-OET-12-313	lincRNA	1.1401	0.4752	2.0284	0.4493	0.3863	0.3387	0
chr5:42475864-42476122	MLT1	5' exon	partial	TCONS_00077278	lincRNA	0.5973	0.166	0.2834	0	0	0	0
chr2:4822655-4822796	MLT1	5' exon	partial	TCONS_00055556	lincRNA	9.244	6.7817	4.9997	1.7486	0	0	0
chr4:8840061-8840327	MLT1	5' exon	partial	Chd7	protein_coding	10.4597	9.0031	9.8606	6.424	4.5569	0.6054	0.8277
chr7:46082354-46082691	MLT1	5' exon	partial	Nomo1	protein_coding	1.2152	0.6429	0.2495	1.1604	0.8077	0.7082	1.0679
chrX:17612118-17612264	MLT1	5' exon	partial	Fundc1	protein_coding	0	0.0289	0.0247	0	0	0	0
chr7:80481896-80482148	MLT1	5' exon	partial	Blm	protein_coding	1.7841	2.6294	2.3806	0.5273	1.1011	0.6247	0.825
chr6:6172681-6172949	MLT1	5' exon	partial	Slc25a13	protein_coding	0.1347	0.758	0.8627	0.3185	0.0685	0.1201	0.2052
chr8:99734930-99735253	MLT1	5' exon	partial	TCONS_00101132	lincRNA	0.1394	0.8716	0.0744	1.5657	0	0.1243	0
chr8:127666007-127666286	MLT1	5' exon	partial	TCONS_00101969	lincRNA	0.071	0.1341	0.1064	0.0571	0.0092	0.0013	0
chr17:12834735-12834883	MLT1	5' exon	partial	TCONS_00047086	lincRNA	2.4617	3.9721	3.3907	0.0939	0	0	0
chr6:95675421-95675749	MLT1	5' exon	partial	Suclg2	protein_coding	0	0	0.5496	0.6087	0.5234	0	0.3921
chr13:47589216-47589334	MLT1	5' exon	partial	TCONS_00026990	lincRNA	0	0.3481	0.0991	0	0	0	0
chr11:23519919-23520250	MLT1	5' exon	partial	1700093K21Rik	protein_coding	0.3587	1.6147	0.3829	0.3392	0	0	0
chr2:65235494-65235624	MLT1	5' exon	partial	Cobll1	protein_coding	4.2272	5.6507	0.6224	0	0	0.1299	0
chr2:110037976-110038217	MLT1	5' exon	partial	Ccdc34	protein_coding	0.4247	0.1623	0.2519	0.0558	0	0.021	0.1348
chr3:31344414-31344800	MLT1	5' exon	partial	TCONS_00063883	lincRNA	23.9819	32.3957	40.5353	17.1567	1.9646	0.0449	0.0128
chr14:121536033-121536365	MLT1	5' exon	partial	TCONS_00036063	lincRNA	0.0791	0.1272	0.1146	0.0601	0.0115	0.005	0.0043
chr3:69197982-69198119	MLT1	5' exon	partial	TCONS_00064579	lincRNA	0.3836	0.2665	1.0009	0	0.0433	0	0
chr1:82694811-82694970	MLT1	5' exon	partial	Col4a3	protein_coding	0.2481	0.4137	0.3237	0	0	0	0
chr8:12963425-12963670	MLT1	5' exon	partial	TCONS_00099254	lincRNA	0.0869	0.0494	0.0674	0.028	0	0	0
chr8:113908075-113908296	MLT1	5' exon	partial	TCONS_00101532	lincRNA	0.5067	0.8065	1.0326	0.1089	0	0	0
chr6:100126442-100126818	MLT1	5' exon	partial	lncRNA-OET-06-191	lincRNA	0.285	2.1385	0.4564	0	0	0	0
chr3:96242790-96242869	MLT1	5' exon	partial	TCONS_00068005	lincRNA	3.3322	2.507	2.1015	2.4876	0.1928	0.2817	0.4883
chr2:74787947-74788185	MLT1	5' exon	partial	TCONS_00056861	lincRNA	0.9186	3.1591	1.2258	0	0	0	0
chr5:6444920-6445087	MLT1	5' exon	partial	TCONS_00076357	lincRNA	0.0506	0.0949	0	0	0	0	0
chr13:9340770-9340991	MLT1	5' exon	partial	Dip2c	protein_coding	3.8897	2.8514	2.7204	0.7929	0.1363	0.2391	0.2043
chr1:7528395-7528619	MLT1	5' exon	partial	TCONS_00000081	lincRNA	0.0378	0.0095	0	0	0	0.0135	0
chr6:95460314-95460732	MLT1	5' exon	partial	TCONS_00088089	lincRNA	0.1389	0.1738	0.0742	0.0411	0	0	0.0265
chr8:110438487-110438669	MLT1	5' exon	partial	TCONS_00098414	lincRNA	0.277	0.5196	0.2218	0.1637	0.1408	0.2469	0.1582
chr12:27113830-27114248	MLT1	5' exon	partial	TCONS_00024179	lincRNA	0.4729	0.8871	0.9255	0.1864	0	0	0
chr9:14891589-14891738	MLT1	5' exon	partial	TCONS_00105089	lincRNA	0.1495	0.088	0.0563	0.0104	0	0	0
chr16:10319558-10319811	MLT1	5' exon	partial	TCONS_00040947	lincRNA	0.1166	0.0972	0.166	0.0919	0	0	0
chr10:62144216-62144561	MLT1	5' exon	partial	2010107G23Rik	protein_coding	12.0249	11.7222	13.6376	3.927	0.276	0.0142	0
chr5:34615874-34616107	MLT1	5' exon	partial	Add1	protein_coding	0	0	0.2506	0	0	0.2092	0.5363
chr8:107564876-107565435	MLT1	5' exon	partial	TCONS_00101325	lincRNA	0.1906	0.1192	0.1526	0	0	0	0
chr18:46043929-46044035	MLT1	5' exon	partial	lncRNA-OET-18-056	lincRNA	0.6023	0.7532	0	0	0.3061	0	0
chr7:45014153-45014388	MLT1	5' exon	partial	Scaf1	protein_coding	2.5538	2.1956	1.1927	1.5096	0.3245	1.2804	0.8509
chr4:45643738-45644255	MLT1	5' exon	partial	TCONS_00073543	lincRNA	0.1225	0.186	0.1214	0.2586	0.0356	0.0156	0
chr2:136178171-136178406	MLT1	5' exon	partial	Pak7	protein_coding	1.0534	1.0214	1.0104	0.2076	0.0078	0	0
chr6:88905897-88905976	MLT1	5' exon	partial	Tpra1	protein_coding	72.2459	45.6221	5.893	1.4188	0	0.4279	1.0968
chr16:11045403-11045567	MLT1	5' exon	partial	TCONS_00040969	lincRNA	0.4141	5.0061	5.3344	2.0156	0.2245	0	0
chr11:118133221-118133358	MLT1	5' exon	partial	Cyth1	protein_coding	1.0614	1.4293	1.7431	1.4479	0.083	0	0
chr13:91099437-91099716	MLT1	5' exon	partial	Atg10	protein_coding	0.1754	0	0	0.4147	0	0	0
chr2:5001538-5001753	MLT1	5' exon	partial	Mcm10	protein_coding	8.5488	9.2018	9.1257	2.047	2.86	2.8936	3.379
chr5:31325753-31326063	MLT1	5' exon	partial	TCONS_00076975	lincRNA	5.7461	6.6532	3.0669	0.5661	0	0	0
chr13:41370236-41370539	MLT1	5' exon	partial	Nedd9	protein_coding	7.0939	8.4677	3.4421	0.3812	0	0	0
chr7:110926628-110926990	MLT1	5' exon	partial	Mrvi1	protein_coding	2.0314	1.2097	1.549	1.1437	1.3767	0.2587	0
chr2:167078348-167078874	MLT1	5' exon	partial	TCONS_00062788	lincRNA	0.1121	0.187	0.1197	0	0.038	0	0
chr9:107861552-107861705	MLT1	5' exon	partial	Rbm6	protein_coding	2.3429	2.1974	2.1884	4.8474	1.7863	1.0442	1.3383
chr7:80000751-80000915	MLT1	5' exon	partial	TCONS_00091081	lincRNA	0.2494	0.4366	0.213	0.059	0	0	0
chr7:121592694-121592785	MLT1	5' exon	partial	lncRNA-OET-07-327	lincRNA	3.3857	4.2339	2.5816	2.2873	0	0	0
chr9:73094772-73095022	MLT1	5' exon	partial	Rab27a	protein_coding	8.4293	8.5992	9.0197	2.9802	1.4349	0.5932	0.2765
chr8:94220498-94220600	MLT1	internal exon	partial	Nup93	protein_coding	1.8417	0	3.2766	1.4516	0	1.6416	0.4675
chr12:75752655-75752809	MLT1	internal exon	partial	TCONS_00024999	lincRNA	5.3512	4.3842	4.1365	0	0	0	0
chr6:98847680-98847938	MLT1	internal exon	partial	TCONS_00085477	lincRNA	0.2725	0.2613	0.3103	0.0215	0.0092	0	0
chr2:106956744-106956931	MLT1	internal exon	partial	lncRNA-OET-02-429	lincRNA	6.9716	7.3415	1.9584	0.4338	0	0	0
chr2:60001494-60001635	MLT1	internal exon	partial	Baz2b	protein_coding	17.5261	15.6547	12.0272	6.6601	3.1814	2.2317	2.3836
chr1:175576278-175576625	MLT1	internal exon	partial	Gm36307	lincRNA	31.9226	54.3956	45.3111	1.2442	0	0	0
chr16:91333937-91334019	MLT1	internal exon	partial	TCONS_00044286	lincRNA	0.7893	1.2064	0.6553	0.0518	0	0	0
chr5:113683261-113683380	MLT1	internal exon	partial	Cmklr1	protein_coding	0.3291	0.6715	0.4068	0.0614	0.0704	0	0
chr10:69607293-69607361	MLT1	internal exon	partial	TCONS_00009294	lincRNA	0.1904	0.7936	0.1355	0	0.129	0	0.0483
chr16:73094385-73094602	MLT1	internal exon	partial	TCONS_00042115	lincRNA	0.2031	0.127	0.1807	0	0	0	0
chr11:104558775-104558944	MLT1	internal exon	partial	lncRNA-OET-11-248	lincRNA	3.2327	4.8846	4.4573	0.3185	0	0	0
chr2:48064582-48064811	MLT1	internal exon	partial	Gm13481	lincRNA	1.13	1.0598	0.9047	0	0	0	0
chr4:12557100-12557518	MLT1	internal exon	partial	lncRNA-OET-04-707	lincRNA	2.1002	3.6768	3.587	0	0	0	0
chr7:73164555-73164678	MLT1	internal exon	partial	TCONS_00094377	lincRNA	0.2876	0.1199	0	0	0	0	0
chr17:31581489-31581841	MLT1	internal exon	partial	Pknox1	protein_coding	0.9047	0.3232	0	0.4584	0.2628	0.9216	1.1812
chr8:117717130-117717287	MLT1	internal exon	partial	TCONS_00101652	lincRNA	0.3052	0.2572	0.4391	0.1098	0.0135	0	0.0051
chr2:155157951-155158146	MLT1	internal exon	partial	Itch	protein_coding	0.7902	1.3833	2.1931	1.4947	1.9277	1.972	1.0832
chr15:24427314-24427632	MLT1	internal exon	partial	TCONS_00036479	lincRNA	0.0753	0.1883	0.3215	0.0297	0	0	0
chr2:167599503-167599738	MLT1	internal exon	partial	lncRNA-OET-02-489	lincRNA	1.0932	0.8203	0.2334	0	0	0	0
chr8:117842097-117842321	MLT1	internal exon	partial	TCONS_00098599	lincRNA	1.7595	0.3143	0.805	0	0	0	0
chr18:4810673-4810929	MLT1	internal exon	partial	TCONS_00049243	lincRNA	0.1174	0.0978	0.0209	0	0	0.0174	0.0298
chr8:117842338-117842536	MLT1	internal exon	partial	TCONS_00098599	lincRNA	1.7595	0.3143	0.805	0	0	0	0
chr1:74468519-74468791	MLT1	internal exon	partial	Usp37	protein_coding	1.2582	1.0868	1.4678	1.5182	1.3318	0.6359	0.4248
chr5:30874471-30874572	MLT1	internal exon	partial	Tmem214	protein_coding	13.4411	16.458	5.9784	1.3242	1.9926	1.9968	1.9194
chr12:105169505-105169685	MLT1	internal exon	partial	TCONS_00023236	lincRNA	3.8147	0.5021	1.5002	0.2374	0	0.179	0
chr3:154373569-154373840	MLT1	internal exon	partial	TCONS_00066217	lincRNA	0.0739	0.0924	0.0591	0	0	0	0
chr1:132803731-132803944	MLT1	internal exon	partial	lncRNA-OET-01-554	lincRNA	1.5676	1.6039	0.6085	0	0	0	0
chr1:132803957-132804145	MLT1	internal exon	partial	lncRNA-OET-01-554	lincRNA	1.5676	1.6039	0.6085	0	0	0	0
chr1:92962248-92962370	MLT1	internal exon	partial	TCONS_00002007	protein_coding	1.3413	0.6709	2.5772	0.3171	0	0	0
chr11:114525898-114526149	MLT1	internal exon	partial	TCONS_00020689	lincRNA	1.2144	1.5187	1.4816	0.2051	0	0	0
chr7:110310163-110310342	MLT1	internal exon	partial	Sbf2	protein_coding	12.5756	6.3508	3.8724	5.7183	0.7375	0.8622	0.9209
chr16:63490187-63490260	MLT1	internal exon	partial	lncRNA-OET-16-060	lincRNA	3.2152	1.1488	0.4903	0	0	0	0
chr14:105402996-105403167	MLT1	internal exon	partial	TCONS_00033637	lincRNA	1.0617	0.0885	0.3778	0.3347	0	0	0
chr10:91434053-91434177	MLT1	internal exon	partial	TCONS_00010087	lincRNA	0.1721	0.3228	0.1837	0.1017	0	0	0
chr4:53319007-53319190	MLT1	internal exon	partial	lncRNA-OET-04-150	lincRNA	0	0.2362	0	6.4762	0.576	0.3367	0
chr8:123445927-123446143	MLT1	internal exon	partial	Def8	protein_coding	0	0	0	1.3014	6.3409	1.6353	0.2795
chr7:24472200-24472338	MLT1	internal exon	partial	Plaur	protein_coding	0	0.1974	0	0.14	0.1604	0.4924	0.3306
chr5:74163850-74164118	MLT1	internal exon	partial	TCONS_00077718	lincRNA	0.3261	0.0816	0.174	0.0386	0	0	0
chr1:61470681-61470955	MLT1	internal exon	partial	Gm11588	lincRNA	0.1868	0.1752	0.2742	0.0828	0	0	0
chr15:36796184-36796344	MLT1	internal exon	partial	Ywhaz	protein_coding	4.8286	2.0127	3.4363	0.3171	0	0.2391	0
chr9:65650896-65651010	MLT1	internal exon	partial	Rbpms2	protein_coding	225.995	182.149	169.031	83.2295	17.8369	17.1476	6.2793
chr17:67476628-67476767	MLT1	internal exon	partial	TCONS_00046358	lincRNA	0.055	0.1377	0.0588	0	0.0112	0	0.0252
chr7:24085447-24085531	MLT1	internal exon	partial	Zfp180	protein_coding	0.3941	1.4785	0	0.4659	4.0062	0.3513	1.2006
chr2:18082431-18082758	MLT1	internal exon	partial	Mllt10	protein_coding	0.297	0.7427	0.4755	0.3511	0.1509	1.0587	1.6962
chr3:103525345-103525446	MLT1	internal exon	partial	lncRNA-OET-03-151	lincRNA	4.2003	3.5017	2.6903	0	0	0	0
chr11:76856201-76856578	MLT1	internal exon	partial	lncRNA-OET-11-049	lincRNA	0.3291	0.4115	0	1.9454	0.6691	0	0
chr19:40910967-40911117	MLT1	internal exon	partial	Zfp518a	protein_coding	26.1185	32.1429	16.3746	11.7633	4.6358	1.1086	1.263
chr17:45776142-45776377	MLT1	internal exon	partial	F630040K05Rik	lincRNA	3.6693	4.5884	2.8724	0.5784	0	0	0
chr5:142298793-142298970	MLT1	internal exon	partial	lncRNA-OET-05-397	lincRNA	7.5112	8.2187	4.5102	0	0	0	0
chr3:10446997-10447082	MLT1	internal exon	partial	lncRNA-OET-03-260	lincRNA	0	0	0	0.85	4.9699	1.538	0.4381
chr11:74919419-74919624	MLT1	internal exon	partial	Srr	protein_coding	0.4238	0.1766	0.4523	2.6719	0.5743	0.6295	0
chr4:144982179-144982272	MLT1	tagging	partial	Vps13d	protein_coding	0.6482	0.2786	0.2378	0.1796	0.2471	0.1535	0.1543
chr18:71953136-71953253	MLT1	tagging	partial	Dcc	protein_coding	0.0302	0.0126	0.0108	0	0	0	0
chr4:40201276-40201372	MLT1	tagging	partial	Aco1	protein_coding	1.0989	1.1746	0.8192	0.0435	0.0936	0.2189	0.1823
chr6:119620571-119620882	MLT1	tagging	partial	Erc1	protein_coding	0.0462	0.0577	0.0282	0.0468	0.0335	0.1058	0.0703
chr17:64429759-64429809	MLT1	tagging	partial	TCONS_00048643	lincRNA	0.1053	0.079	0.1573	0	0	0	0
chr7:117840424-117840512	MLT1	tagging	partial	TCONS_00091900	lincRNA	0.2614	0.25	0.0492	0	0	0	0
chr4:118671441-118671782	MLT1	tagging	partial	TCONS_00074834	protein_coding	0.3056	0.3301	0.2818	0.0328	0.0424	0.0124	0
chr5:123007772-123007859	MLT1	tagging	partial	Kdm2b	protein_coding	15.5628	20.1433	14.6428	0.2976	0.0853	0	0
chr1:189472549-189472704	MLT1	tagging	partial	TCONS_00007877	lincRNA	0.0669	0.1953	0.1191	0.0132	0	0	0
chr5:72676451-72676714	MLT1	tagging	partial	TCONS_00081421	lincRNA	0.3123	0.3296	0.4324	0.1731	0.0446	0.0044	0.0074
chrX:160529078-160529329	MLT1	tagging	partial	Phka2	protein_coding	0.7601	0.9091	0.5997	0.1172	0	0.0295	0.1258
chr17:33743215-33743501	MLT1	tagging	partial	Rab11b	protein_coding	0.4312	0.2996	0.1982	0.8426	0.5236	0.3203	0.333
chr11:25187994-25188130	MLT1	tagging	partial	TCONS_00014829	lincRNA	0.0413	0.0258	0.0661	0	0	0	0
chr1:97620757-97620881	MLT1	tagging	partial	D1Ertd622e	protein_coding	0.8689	0.656	0.5302	0.4873	0.0365	0.0107	0.0055
chr6:39817118-39817234	MLT1	tagging	partial	TCONS_00084319	lincRNA	2.9149	3.0764	3.2669	1.4946	0.0878	0.0122	0
chr17:64429449-64429591	MLT1	tagging	partial	TCONS_00048643	lincRNA	0.1053	0.079	0.1573	0	0	0	0
chr9:107053313-107053416	MLT1	tagging	partial	Manf	protein_coding	0.0853	0.0356	0.0152	0.042	0.0145	0.0063	0.0054
chr7:119599615-119599674	MLT1	tagging	partial	Acsm2	protein_coding	0.0467	0.0167	0.0428	0	0.0068	0	0
chr3:39777638-39777966	MLT1	tagging	partial	TCONS_00066979	protein_coding	0.0268	0.0154	0.0176	0.0024	0.0021	0	0
chr7:24340780-24340926	MLT1	tagging	partial	TCONS_00089805	lincRNA	0.2144	0.0894	0.0953	0	0	0	0
chr15:98887568-98887693	MLT1	tagging	partial	TCONS_00038045	lincRNA	0.025	0.1249	0.24	0.0591	0.0508	0.0891	0
chr17:11546563-11546690	MLT1	tagging	partial	TCONS_00047065	lincRNA	0.2399	0.2153	0.2339	0.1727	0.0106	0	0.004
chr9:107053807-107053951	MLT1	tagging	partial	Manf	protein_coding	0.0853	0.0356	0.0152	0.042	0.0145	0.0063	0.0054
chr7:114977032-114977101	MLT1	tagging	partial	RP23-370I17.3	lincRNA	4.2139	4.9469	4.4983	0.7219	0.035	0	0
chr6:21579352-21579543	MLT1	tagging	partial	TCONS_00086691	lincRNA	0.021	0.0438	0.0299	0.0083	0	0	0
chr3:102705013-102705360	MLT1	tagging	partial	TCONS_00065364	lincRNA	0.0567	0.0425	0.1815	0	0	0	0
chr1:24764380-24764562	MLT1	tagging	partial	Lmbrd1	protein_coding	0.5122	0.4777	0.1483	0.0103	0.3707	0.2244	0.205
chr15:85286234-85286291	MLT1	tagging	partial	Fbln1	protein_coding	0	0.0534	0	0.1766	0.1301	0	0.4225
chr1:21923516-21923768	MLT1	tagging	partial	TCONS_00000375	lincRNA	0.0208	0	0.0445	0	0	0	0
chr9:75486706-75486810	MLT1	tagging	partial	TCONS_00103690	lincRNA	0.8116	0.9889	1.0219	0.3608	0.0423	0.0185	0.0264
chr6:89267728-89268100	MLT1	tagging	partial	TCONS_00087905	lincRNA	0.0619	0.0111	0.0378	0	0	0	0
chr9:105989585-105989765	MLT1	tagging	partial	Col6a4	protein_coding	0.5085	0.318	0.0494	0	0.094	0.0618	0.0528
chr1:78620185-78620256	MLT1	tagging	partial	TCONS_00001561	lincRNA	0.0282	0.0705	0.0451	0	0	0	0
chr1:97619635-97619781	MLT1	tagging	partial	D1Ertd622e	protein_coding	0.8689	0.656	0.5302	0.4873	0.0365	0.0107	0.0055
chr5:65895660-65895917	MLT1	tagging	partial	Rhoh	protein_coding	3.1218	3.4426	1.5748	0.0857	0.0067	0	0.005
chr1:182906932-182907055	MLT1	tagging	partial	TCONS_00007739	lincRNA	0.0316	0.0554	0.0203	0.0374	0	0	0
chr10:113446988-113447152	MLT1	tagging	partial	TCONS_00010503	lincRNA	0.1395	0.2617	0.2978	0	0	0	0
chr14:102011067-102011217	MLT1	tagging	partial	TCONS_00033571	lincRNA	0.1842	0.1996	0.2097	0.029	0.0094	0	0
chr10:9451879-9452041	MLT1	tagging	partial	TCONS_00011297	lincRNA	0.002	0.0017	0.0007	0	0.0013	0	0.001
chr10:10488605-10488751	MLT1	tagging	partial	TCONS_00008210	protein_coding	0.0324	0.0694	0.0889	0.0219	0.0063	0	0
chr10:16952241-16952486	MLT1	tagging	partial	Gm20125	lincRNA	0.0305	0.0191	0.0163	0	0	0	0
chr9:45251139-45251388	MLT1	tagging	partial	BC049352	protein_coding	0.0638	0.0931	0.1022	0	0	0	0
chr19:57998734-57998849	MLT1	tagging	partial	CUFF.24950.1	lincRNA	0.0456	0.076	0.0974	0	0	0.0135	0.0463
chr10:53795684-53795828	MLT1	tagging	partial	TCONS_00012202	lincRNA	0.1915	0.196	0.3067	0.0412	0	0	0
chr12:24465987-24466119	MLT1	tagging	partial	TCONS_00021741	lincRNA	0.0303	0.0379	0.097	0	0	0	0
chr8:29256352-29256675	MLT1	tagging	partial	TCONS_00099803	lincRNA	0	0	0.0669	0.9639	0.085	0	0
chr8:18803069-18803166	MLT1	tagging	partial	Mcph1	protein_coding	1.7492	1.923	1.621	0.5852	0.3957	0.1756	0.0878
chr16:87363271-87363359	MLT1	tagging	partial	N6amt1	protein_coding	0.0203	0	0.0216	0	0.1442	0.0993	0.0849
chr3:69753381-69753587	MLT1	tagging	partial	Nmd3	protein_coding	0.3191	0.4043	0.2421	0.2532	0.2519	0.1684	0.0863
chr8:48155033-48155255	MLT1	tagging	partial	TCONS_00097156	lincRNA	0.0229	0.043	0.0245	0.1219	0	0.0306	0.0174
chr6:102165471-102165534	MLT1	tagging	partial	Cntn3	protein_coding	0.027	0.0338	0.0096	0	0	0	0
chr4:88413680-88413757	MLT1	tagging	partial	Hacd4	protein_coding	0.8474	0.647	0.3682	0.0621	0.0076	0.0201	0.04
chr19:59238706-59238876	MLT1	tagging	partial	Kcnk18	protein_coding	3.9796	3.4756	3.5249	1.2948	0.1574	0.0025	0.0063
chr7:123373562-123373671	MLT1	tagging	partial	TCONS_00092042	lincRNA	0.0291	0.0073	0.0622	0.1997	0.0178	0.0052	0.0266
chr5:139146219-139146375	MLT1	tagging	partial	Prkar1b	protein_coding	0.0227	0.0095	0.0486	0.0896	0.054	0.027	0.0462
chr4:131733878-131733965	MLT1	tagging	partial	TCONS_00075236	lincRNA	0.0388	0.1943	0.1866	0	0	0	0
chr18:29900632-29900927	MLT1	tagging	partial	TCONS_00049702	lincRNA	0.0824	0.0515	0.0293	0.0041	0	0	0
chr14:123179490-123179598	MLT1	tagging	partial	TCONS_00033898	lincRNA	3.2002	3.6385	3.3175	0.5725	0.0358	0	0
chr4:87174243-87174438	MLT1	tagging	partial	Slc24a2	protein_coding	0.3007	0.3635	0.3424	0.0948	0	0	0
chr4:103356517-103356668	MLT1	tagging	partial	Oma1	protein_coding	0.2913	0.1093	0.1088	0.0344	0.0148	0.0389	0.0444
chr10:10488809-10488973	MLT1	tagging	partial	TCONS_00008210	protein_coding	0.0324	0.0694	0.0889	0.0219	0.0063	0	0
chr4:87174591-87174723	MLT1	tagging	partial	Slc24a2	protein_coding	0.3007	0.3635	0.3424	0.0948	0	0	0
chr1:21923406-21923490	MLT1	tagging	partial	TCONS_00000375	lincRNA	0.0208	0	0.0445	0	0	0	0
chr12:24466276-24466399	MLT1	tagging	partial	TCONS_00021741	lincRNA	0.0303	0.0379	0.097	0	0	0	0
chr2:70877550-70877763	MLT1	tagging	partial	Gm13632	lincRNA	1.2252	1.1181	1.0958	0.3132	0	0	0
chr9:34803251-34803357	MLT1	tagging	partial	TCONS_00105612	lincRNA	0.018	0.0562	0.0672	0.0106	0	0	0
chr2:44412620-44412972	MLT1	tagging	partial	TCONS_00060350	lincRNA	0.018	0.015	0.0064	0.0142	0	0	0
chr3:35961976-35962293	MLT1	tagging	partial	Mccc1	protein_coding	0.0649	0.1218	0.0173	0.0192	0.033	0.1447	0.2102
chr19:57589428-57589534	MLT1	tagging	partial	TCONS_00053907	lincRNA	0.0289	0	0	0	0	0	0
chr4:9716288-9716627	MLT1	tagging	partial	TCONS_00069264	lincRNA	0.501	0.3365	0.1931	0	0.0141	0.0083	0.0141
chr7:45900198-45900363	MLT1	tagging	partial	Tmem143	protein_coding	0.4309	0.3169	0.23	0.015	0	0.0113	0.0483
chr2:92453007-92453293	MLT1	tagging	partial	Slc35c1	protein_coding	2.397	2.6401	1.9995	0.5067	0.2905	0.1839	0.5078
chr10:66549955-66549985	MLT1	tagging	partial	TCONS_00012490	lincRNA	0.0104	0.0049	0.0166	0	0.0013	0	0
chr13:56995953-56996260	MLT1	tagging	partial	TCONS_00027292	lincRNA	0.0499	0.0208	0.0355	0	0	0	0
chr6:85639995-85640298	MLT1	tagging	partial	Alms1	protein_coding	0.3626	0.5997	0.2872	0.2074	0.1546	0.1147	0.1336
chr3:10392212-10392384	MLT1	tagging	partial	Chmp4c	protein_coding	0	0	0.0188	0.0139	0.0419	0.1888	0.3136
chr8:42614776-42615121	MLT1	tagging	partial	TCONS_00100133	lincRNA	0.0105	0.0059	0.0041	0	0	0.0008	0
chr3:116835666-116835870	MLT1	tagging	partial	lncRNA-OET-03-303	lincRNA	0.127	0.1588	0.0904	0.8009	0.3443	0.1887	0.0645
chr8:18591587-18591746	MLT1	tagging	partial	TCONS_00096378	lincRNA	0.4012	0.439	0.4952	0.0445	0.0382	0.0112	0.0095
chr8:66891656-66891832	MLT1	tagging	partial	Naf1	protein_coding	0.1252	0.1479	0.1262	0.1727	0.6293	0.2232	0.1272
chr3:126784079-126784428	MLT1	tagging	partial	Camk2d	protein_coding	0.0781	0	0	0	0	0.2783	0.5944
chr18:44675451-44675777	MLT1	tagging	partial	TCONS_00050079	lincRNA	0.0715	0.0894	0.0382	0	0	0	0
chr3:10391826-10391891	MLT1	tagging	partial	Chmp4c	protein_coding	0	0	0.0188	0.0139	0.0419	0.1888	0.3136
chr16:9079743-9079925	MLT1	tagging	partial	TCONS_00042744	lincRNA	0.0544	0.1299	0.0687	0.0058	0	0	0
chr3:8635867-8635982	MLT1	tagging	partial	Gm32496	lincRNA	0.0913	0.1405	0.0825	0.0083	0	0	0
chr5:100734952-100735268	MLT1	tagging	partial	TCONS_00078378	lincRNA	0.4156	0.5266	0.4203	0.1875	0	0.0097	0.0292
chrX:11770132-11770262	MLT1	tagging	partial	TCONS_00110706	lincRNA	0.2992	0.2806	0.1757	0.0177	0	0	0
chr1:119969177-119969259	MLT1	tagging	partial	TCONS_00006273	lincRNA	0.4879	0.5121	0.4139	0.2112	0.0354	0	0
chr16:49415584-49415887	MLT1	tagging	partial	TCONS_00041896	lincRNA	0.2894	0.2355	0.1632	0.0323	0.0111	0.0049	0
chr9:120784266-120784366	MLT1	tagging	partial	TCONS_00107673	lincRNA	5.122	6.6988	5.5023	0.1867	0.0165	0	0
chr5:35573274-35573398	MLT1	tagging	partial	Trmt44	protein_coding	0.1503	0.047	0.0401	0.0889	0.4966	0.3684	0.2433
chr2:133368525-133368718	MLT1	tagging	partial	TCONS_00062064	lincRNA	0.0247	0.0371	0.037	0.0117	0.0025	0.0022	0
chr8:103521375-103521413	MLT1	tagging	partial	TCONS_00101177	lincRNA	0.0637	0.1036	0.0408	0.0151	0.0065	0	0.0049
chr10:93380482-93380792	MLT1	tagging	partial	TCONS_00013147	lincRNA	0.7101	0.2874	0.1139	0.0485	0.0209	0.011	0.0063
chr6:127117840-127118040	MLT1	tagging	partial	Ccnd2	protein_coding	0.0622	0.0219	0.0208	0.0805	0.0455	0.0087	0.0133
chr4:154866836-154867152	MLT1	tagging	partial	Ttc34	protein_coding	2.5262	2.6384	1.6968	0.179	0	0	0
chr14:69349340-69349388	MLT1	tagging	partial	Entpd4	protein_coding	0.0673	0.1823	0.0359	0.0133	0	0	0.0085
chr7:73122078-73122417	MLT1	tagging	partial	TCONS_00094378	lincRNA	0.2827	0.3535	0.2321	0.0514	0	0	0
chr7:6293967-6294176	MLT1	tagging	partial	Zfp667	protein_coding	0.2078	0.1559	0.1331	0.0491	0.0423	0	0.095
chr16:41968759-41968911	MLT1	tagging	partial	TCONS_00043537	protein_coding	0.0938	0.1119	0.0893	0.0051	0	0	0
chr13:49413121-49413290	MLT1	tagging	partial	TCONS_00029719	lincRNA	0.0692	0.0433	0.0985	0.0409	0	0	0
chr7:140105025-140105188	MLT1	tagging	partial	Echs1	protein_coding	2.1516	2.2238	1.1953	0.1557	0.1116	0.7436	0.6856
chr14:120490708-120491023	MLT1	tagging	partial	TCONS_00036018	lincRNA	0.0243	0.0304	0.0714	0.0431	0.0186	0.0434	0.0232
chr1:182245334-182245431	MLT1	tagging	partial	TCONS_00003650	lincRNA	0.0895	0.064	0.1147	0.006	0	0.0023	0
chr18:35502926-35503236	MLT1	tagging	partial	TCONS_00049863	lincRNA	0.0175	0.0218	0.0373	0.0103	0	0	0.0066
chr2:70876947-70877026	MLT1	tagging	partial	Gm13632	lincRNA	1.2252	1.1181	1.0958	0.3132	0	0	0
chrX:39061622-39061747	MLT1	tagging	partial	TCONS_00108800	lincRNA	0.0191	0.0184	0.011	0.0052	0	0.0013	0
chr11:119904074-119904260	MLT1	tagging	partial	TCONS_00020939	lincRNA	0.0164	0.0257	0.0219	0.1748	0.0418	0.0037	0.0188
chr14:27417501-27417585	MLT1	tagging	partial	TCONS_00034377	lincRNA	0.0895	0.0622	0.0743	0.0118	0.0051	0.0133	0.0265
chr15:5135815-5136119	MLT1	tagging	partial	TCONS_00036140	lincRNA	0.0125	0.0312	0.0266	0	0.0254	0.0111	0.0095
chr4:47175333-47175484	MLT1	tagging	partial	TCONS_00070085	lincRNA	0.0263	0.011	0	0	0	0	0
chr14:46369805-46369989	MLT1	tagging	partial	TCONS_00032531	lincRNA	0.0418	0.0348	0.0446	0	0	0	0
chr10:71461156-71461347	MLT1	tagging	partial	TCONS_00009384	lincRNA	0.0073	0.0076	0.0169	0.0086	0.0148	0.0032	0.0037
chr8:18591201-18591301	MLT1	tagging	partial	TCONS_00096378	lincRNA	0.4012	0.439	0.4952	0.0445	0.0382	0.0112	0.0095
chrX:39065247-39065363	MLT1	tagging	partial	TCONS_00108800	lincRNA	0.0191	0.0184	0.011	0.0052	0	0.0013	0
chr14:64883924-64884233	MLT1	tagging	partial	Hmbox1	protein_coding	0.1877	0.1429	0.1481	0.164	0.224	0.2037	0.2299
chr11:9221994-9222304	MLT1	tagging	partial	Abca13	protein_coding	0.1863	0.1483	0.1537	0.0801	0.0086	0	0
chr14:69567590-69567638	MLT1	tagging	partial	Gm21685	protein_coding	0.0561	0.1122	0.0359	0.0133	0	0.01	0
chr4:45844746-45844876	MLT1	tagging	partial	TCONS_00070051	lincRNA	0.0784	0.0735	0.0627	0	0	0	0
chr4:123206715-123207026	MLT1	tagging	partial	TCONS_00074947	lincRNA	0.0113	0.0564	0.0481	0.0267	0	0	0
chr11:95177724-95177862	MLT1	tagging	partial	TCONS_00020033	lincRNA	0.3873	0.3715	0.2729	0.0533	0.0038	0.0034	0
chr8:26271200-26271494	MLT1	tagging	partial	TCONS_00099699	lincRNA	0.1196	0.1196	0.1149	0	0	0	0
chr5:77178493-77178550	MLT1	tagging	partial	TCONS_00081508	lincRNA	0.0341	0.0597	0.0219	0	0	0	0
chr2:170703737-170704086	MLT1	tagging	partial	TCONS_00062913	lincRNA	0.136	0.1701	0.2489	0.0287	0	0	0
chr17:30591834-30592051	MLT1	tagging	partial	Glo1	protein_coding	0.0873	0.1092	0.1305	0.0413	0.071	0.1401	0.1995
chr1:79997710-79997834	MLT1	tagging	partial	TCONS_00001588	lincRNA	0.2233	0.1883	0.255	0.3561	0.0845	0.0324	0.0119
chr18:58989651-58989874	MLT1	tagging	partial	CUFF.23155.1	lincRNA	0.2852	0.1961	0.1065	0.6405	0.087	0	0
chr1:170374443-170374763	MLT1	tagging	partial	Nos1ap	protein_coding	0.1935	0.2572	0.1679	0.0429	0.0123	0	0.0184
chr9:37648820-37649098	MLT1	tagging	partial	Siae	protein_coding	1.4295	1.4247	0.8261	0.1906	0.3496	0.2012	0.2947
chr14:86150017-86150227	MLT1	tagging	partial	TCONS_00033400	lincRNA	0.4406	0.7347	0.3136	0	0	0	0
chr9:120784734-120784877	MLT1	tagging	partial	TCONS_00107673	lincRNA	5.122	6.6988	5.5023	0.1867	0.0165	0	0
chr9:34802574-34802710	MLT1	tagging	partial	TCONS_00105612	lincRNA	0.018	0.0562	0.0672	0.0106	0	0	0
chr4:104816939-104817269	MLT1	tagging	partial	C8a	protein_coding	0.0161	0.0604	0.0172	0.0952	0	0	0
chr1:73617450-73617761	MLT1	tagging	partial	TCONS_00005494	lincRNA	0.0634	0.0793	0.0451	0.075	0	0	0
chr10:18217003-18217328	MLT1	tagging	partial	Ccdc28a	protein_coding	1.2634	0.931	0.9392	0.4534	0.0688	0.0201	0.0172
chr8:31624730-31625009	MLT1	tagging	partial	TCONS_00099845	lincRNA	0.8111	0.8694	0.9895	0.4795	0.3534	0	0
chr7:80481577-80481703	MLT1	tagging	partial	Blm	protein_coding	1.7841	2.6294	2.3806	0.5273	1.1011	0.6247	0.825
chr19:15654665-15654806	MLT1	tagging	partial	TCONS_00054516	lincRNA	0.0775	0.0187	0.0218	0.0048	0.0014	0	0
chr9:86296620-86296944	MLT1	tagging	partial	TCONS_00103831	lincRNA	0	0	0.0965	0.1555	0.0167	0.0147	0
chr10:119613585-119613683	MLT1	tagging	partial	TCONS_00013880	lincRNA	0.0528	0.0293	0.0626	0.0104	0	0.0026	0.0067
chr10:124916155-124916385	MLT1	tagging	partial	TCONS_00010854	lincRNA	0.0292	0.0487	0.065	0.0173	0	0	0
chr6:51405335-51405402	MLT1	tagging	partial	TCONS_00087271	lincRNA	0.7911	0.7359	0.8651	0.0912	0.0098	0	0
chr10:9473408-9473572	MLT1	tagging	partial	TCONS_00011297	lincRNA	0.002	0.0017	0.0007	0	0.0013	0	0.001
chr16:95756753-95756860	MLT1	tagging	partial	TCONS_00044376	lincRNA	0.4041	0	0.2157	0	0	0	0
chr17:36975491-36975796	MLT1	tagging	partial	2410137M14Rik	protein_coding	0.0962	0.0601	0.0103	0.0341	0.0098	0	0.0073
chr5:77178671-77178782	MLT1	tagging	partial	TCONS_00081508	lincRNA	0.0341	0.0597	0.0219	0	0	0	0
chr12:41358793-41359077	MLT1	tagging	partial	TCONS_00022036	lincRNA	0.0044	0.0056	0.0047	0.0158	0	0	0.0237
chr1:162504853-162505222	MLT1	tagging	partial	TCONS_00007222	lincRNA	0.0382	0.0159	0.0272	0	0	0	0
chr3:54500710-54500841	MLT1	tagging	partial	TCONS_00067186	lincRNA	0.2447	0.102	0.0871	0.0643	0	0	0
chr8:23284742-23285084	MLT1	tagging	partial	TCONS_00096518	lincRNA	0	0	0.003	0.0469	0.0029	0.0051	0
chr2:7513744-7513932	MLT1	tagging	partial	TCONS_00055634	lincRNA	0.0866	0.2381	0.4066	0.0409	0	0	0
chr10:124915208-124915293	MLT1	tagging	partial	TCONS_00010854	lincRNA	0.0292	0.0487	0.065	0.0173	0	0	0
chr13:57941435-57941649	MLT1	tagging	partial	TCONS_00030017	lincRNA	1.6168	1.4391	1.4004	0.4082	0.0409	0	0
chr8:13322348-13322619	MLT1	tagging	partial	Tmco3	protein_coding	1.6227	0.9224	0.5039	0.157	0.09	0.0394	0.0225
chr5:91931426-91931697	MLT1	tagging	partial	TCONS_00077967	lincRNA	0	0	0.0516	0.6004	0.0738	0.0216	0.0553
chr10:9473198-9473333	MLT1	tagging	partial	TCONS_00011297	lincRNA	0.002	0.0017	0.0007	0	0.0013	0	0.001
chr12:118515897-118516205	MLT1	tagging	partial	TCONS_00025893	lincRNA	0	0.0127	0.0108	0	0	0	0
chr10:66550373-66550637	MLT1	tagging	partial	TCONS_00012490	lincRNA	0.0104	0.0049	0.0166	0	0.0013	0	0
chr13:32533947-32534301	MLT1	tagging	partial	lncRNA-OET-13-146	lincRNA	0.5486	0.3811	0.4066	0.054	0.0155	0	0
chr15:96277422-96277590	MLT1	tagging	partial	TCONS_00040239	lincRNA	0.5444	0.6969	0.5811	0.2758	0.303	0.0693	0.079
chr8:21230190-21230281	MLT1	tagging	partial	TCONS_00099445	lincRNA	0.0884	0.065	0.0943	0.0922	0.0423	0.0139	0
chr7:6307204-6307522	MLT1	tagging	partial	Zfp667	protein_coding	0.2906	0.3149	0.2275	0.0802	0.0295	0.0345	0.1844
chr2:57408571-57408875	MLT1	tagging	partial	TCONS_00060584	lincRNA	0.0212	0.0114	0.0291	0.0036	0.0031	0.0027	0.0023
chr1:43747811-43748000	MLT1	tagging	partial	Uxs1	protein_coding	3.8717	3.7134	1.8659	0.2444	0.0478	0.0335	0.0501
chr8:103521716-103522014	MLT1	tagging	partial	TCONS_00101177	lincRNA	0.0637	0.1036	0.0408	0.0151	0.0065	0	0.0049
chr6:84833793-84834099	MLT1	tagging	partial	Exoc6b	protein_coding	0.0505	0.1262	0.0359	0.0199	0	0.03	0.0512
chr12:109378373-109378638	MLT1	tagging	partial	TCONS_00025672	lincRNA	0.1728	0.1994	0.1561	0.0786	0	0	0
chr16:4434752-4434863	MLT1	tagging	partial	TCONS_00040642	lincRNA	0.0044	0.0713	0.1405	0.0104	0.0045	0	0
chr10:119615923-119616135	MLT1	tagging	partial	TCONS_00013880	lincRNA	0.0528	0.0293	0.0626	0.0104	0	0.0026	0.0067
chr2:4818115-4818263	MLT1	tagging	partial	TCONS_00059316	lincRNA	0.1644	0.1371	0.0585	0	0	0.0488	0
chr1:80059977-80060130	MLT1	tagging	partial	TCONS_00005661	lincRNA	0.5758	0.6372	0.5167	0.1566	0.0155	0	0
chr16:43828177-43828343	MLT1	tagging	partial	Drd3	protein_coding	0.0198	0.0124	0.0369	0.1461	0.1759	0.0308	0.0188
chr15:5136625-5136660	MLT1	tagging	partial	TCONS_00036140	lincRNA	0.0125	0.0312	0.0266	0	0.0254	0.0111	0.0095
chr10:31644052-31644362	MLT1	tagging	partial	TCONS_00011777	lincRNA	0.629	0.6102	0.6087	0.1182	0	0.0052	0
chr1:183417546-183417652	MLT1	tagging	partial	Hhipl2	protein_coding	0.2724	0.1362	0.2326	0.2254	0	0	0.0207
chr4:58993695-58993811	MLT1	tagging	partial	Dnajc25	protein_coding	0.081	0.076	0.1297	0	0	0.009	0.0077
chr14:26401456-26401567	MLT1	tagging	partial	TCONS_00031896	lincRNA	0.0405	0.0633	0.0108	0.0359	0.0206	0.0361	0.0308
chr15:93953314-93953532	MLT1	tagging	partial	TCONS_00040131	lincRNA	0.2301	0.2031	0.1878	0.04	0	0	0
chr13:15826534-15826673	MLT1	tagging	partial	TCONS_00028904	lincRNA	0.3877	0.0808	0.138	0.0764	0	0	0
chr12:105392915-105393069	MLT1	tagging	partial	TCONS_00023249	lincRNA	0.1517	0.2773	0.299	0.0276	0	0	0
chr14:49292767-49293001	MLT1	tagging	partial	TCONS_00032623	lincRNA	0.0126	0.0043	0.0024	0.0068	0	0.002	0.0035
chr2:4832200-4832380	MLT1	tagging	partial	TCONS_00059317	protein_coding	2.7261	2.7332	2.2729	0.3433	0.0082	0.0072	0
chr7:24339784-24339877	MLT1	tagging	partial	TCONS_00089805	lincRNA	0.2144	0.0894	0.0953	0	0	0	0
chr13:119651570-119651910	MLT1	tagging	partial	Ccl28	protein_coding	0.3476	0.2288	0.2832	0.0324	0.0093	0	0.0209
chr14:60543511-60543584	MLT1	tagging	partial	TCONS_00035211	lincRNA	0.1183	0.2662	0.2651	0.014	0.012	0	0
chr6:117482274-117482531	MLT1	tagging	partial	TCONS_00088429	lincRNA	0.0952	0.1428	0.1118	0.0225	0	0	0.0072
chr2:84003756-84003905	MLT1	tagging	partial	TCONS_00057013	lincRNA	0.0642	0.2756	0.271	0.0231	0.0028	0	0
chr19:4965069-4965173	MLT1	tagging	partial	Mrpl11	protein_coding	0.6187	0.5845	0.4256	0.065	0.5031	0.4289	0.2513
chr7:143897746-143897967	MLT1	tagging	partial	Gm498	protein_coding	0.2602	0.1953	0.1945	0.0615	0	0	0
chr5:72597316-72597381	MLT1	tagging	partial	TCONS_00081416	lincRNA	0.3973	0.6459	0.4157	0.0094	0	0	0
chr15:65172147-65172574	MLT1	tagging	partial	TCONS_00039324	lincRNA	0.1025	0.0757	0.0994	0	0	0	0
chr2:84006702-84006800	MLT1	tagging	partial	TCONS_00057013	lincRNA	0.0642	0.2756	0.271	0.0231	0.0028	0	0
chr1:37878981-37879075	MLT1	tagging	partial	Mitd1	protein_coding	2.4269	2.8014	2.1921	0.2207	0.7591	0.3328	0.2844
chr1:143747420-143747609	MLT1	tagging	partial	Glrx2	protein_coding	0.0302	0.0378	0.0215	0.1072	0.1946	0.0629	0.023
chr7:28193477-28193526	MLT1	tagging	partial	Dyrk1b	protein_coding	0.2858	0.2954	0.2366	0.4965	0.2016	0.078	0.0511
chr10:17847253-17847318	MLT1	tagging	partial	TCONS_00011481	lincRNA	0.0447	0.04	0.0136	0	0	0	0
chr5:30564172-30564520	MLT1	tagging	partial	TCONS_00076910	lincRNA	0.0599	0.0136	0.0058	0	0.0055	0	0.0041
chr16:95842089-95842226	MLT1	tagging	partial	lncRNA-OET-16-076	lincRNA	3.6314	4.4355	1.7129	0.0998	0	0	0.0643
chr13:97349220-97349541	MLT1	tagging	partial	TCONS_00030963	lincRNA	0.04	0.0285	0.0366	0.0067	0.0058	0.0051	0.0087
chr2:19350622-19350703	MLT1	tagging	partial	TCONS_00059678	lincRNA	0.041	0.0205	0.035	0.0097	0	0	0
chr13:43496065-43496497	MLT1	tagging	partial	TCONS_00026854	lincRNA	0.6861	0.7181	0.7896	0.2992	0.0049	0	0
chr16:22690741-22690962	MLT1	tagging	partial	TCONS_00041327	lincRNA	0.0881	0.0826	0.1176	0.0521	0	0	0
chr10:20832270-20832518	MLT1	tagging	partial	TCONS_00008436	lincRNA	0.106	0.0379	0.0808	0.0179	0	0	0
chr9:99621535-99621622	MLT1	tagging	partial	A4gnt	protein_coding	0.161	0.2517	0.043	0	0.0136	0	0
chr11:60902602-60902679	MLT1	tagging	partial	Natd1	protein_coding	11.7251	11.0883	6.1578	1.7533	0.9998	0.2418	0.3053
chr17:69294651-69294772	MLT1	tagging	partial	TCONS_00048810	lincRNA	1.1097	1.5089	0.9316	0.0382	0.011	0	0
chr11:24721553-24721766	MLT1	tagging	partial	Gm10466	lincRNA	0.8721	1.2637	1.197	0.3437	0.0281	0	0
chr12:110383504-110383575	MLT1	tagging	partial	TCONS_00025695	lincRNA	0.6993	0.6173	0.8783	0	0.0418	0.0367	0.0627
chr11:20375252-20375341	MLT1	tagging	partial	TCONS_00018001	lincRNA	0.2687	0.2688	0.2868	0.0953	0.0819	0	0
chr1:82392053-82392152	MLT1	tagging	partial	lncRNA-OET-01-268	lincRNA	1.8641	1.7483	0.7462	1.9284	0.4737	0.4154	0.3549
chr19:44306281-44306423	MLT1	tagging	partial	Scd2	protein_coding	0.0496	0.2583	0.0617	2.139	0.21	11.2961	3.1775
chr17:9593915-9594026	MLT1	tagging	partial	TCONS_00044779	lincRNA	0.0411	0.1028	0.1024	0	0.0139	0	0
chr9:24740364-24740540	MLT1	tagging	partial	Tbx20	protein_coding	0.1425	0	0.0761	0.1685	0.1449	0.8257	0.5427
chr7:36339866-36339987	MLT1	tagging	partial	TCONS_00093765	lincRNA	0.0906	0.0755	0.0967	0.0153	0	0	0
chr16:7460550-7460609	MLT1	tagging	partial	TCONS_00042684	lincRNA	0.5078	0.3419	0.3002	0.0554	0.0159	0.0209	0
chr16:7459811-7459913	MLT1	tagging	partial	TCONS_00042684	lincRNA	0.5078	0.3419	0.3002	0.0554	0.0159	0.0209	0
chr7:79808528-79808592	MLT1	tagging	partial	Mesp2	protein_coding	4.0005	3.6526	2.2892	1.7834	0.0752	0.0066	0
chr10:43701777-43701928	MLT1	tagging	partial	TCONS_00012052	lincRNA	0.2012	0.549	0.4687	0	0.0186	0	0
chr8:24218814-24218927	MLT1	tagging	partial	TCONS_00096547	lincRNA	0.0639	0.04	0	0	0	0	0
chr13:15766096-15766201	MLT1	tagging	partial	TCONS_00026251	lincRNA	0.0116	0	0.0124	0	0	0	0
chrX:166390164-166390480	MLT1	tagging	partial	Ofd1	protein_coding	1.6761	0.6669	0.732	0.2702	0.0774	0	0.058
chr19:27335718-27336008	MLT1	tagging	partial	Kcnv2	protein_coding	0.0722	0.1128	0.1156	0.1067	0.0183	0.0241	0.2199
chr4:136245138-136245241	MLT1	tagging	partial	Asap3	protein_coding	0.0717	0.0897	0.0459	0.017	0.0437	0.1406	0.0328
chr7:67171281-67171709	MLT1	tagging	partial	TCONS_00094296	lincRNA	0.3818	0.4204	0.3987	0.0981	0.0084	0	0
chr9:106162476-106162648	MLT1	tagging	partial	TCONS_00104223	lincRNA	0.0696	0.0652	0.0464	0	0.0354	0.0078	0.0132
chr19:3763947-3763976	MLT1	tagging	partial	TCONS_00053984	lincRNA	0.0482	0.0431	0.0589	0.0733	0.042	0.0553	0.0525
chr13:59966538-59966636	MLT1	tagging	partial	TCONS_00027400	lincRNA	0.2379	0.3967	0.6773	0	0	0	0
chr8:126069865-126069948	MLT1	tagging	partial	TCONS_00098895	lincRNA	0.0085	0.0106	0.013	0	0.0012	0	0.0009
chr19:3764169-3764369	MLT1	tagging	partial	TCONS_00053984	lincRNA	0.0482	0.0431	0.0589	0.0733	0.042	0.0553	0.0525
chr1:171643437-171643599	MLT1	tagging	partial	TCONS_00003400	lincRNA	0.0578	0.008	0.0069	0.0228	0.0131	0	0.0049
chr15:41688551-41688702	MLT1	tagging	partial	TCONS_00038980	lincRNA	0.0087	0.0217	0	0.0103	0	0	0.0066
chr11:62513601-62513689	MLT1	tagging	partial	Pigl	protein_coding	0.4428	0.5537	0.2701	0.5235	0.9859	0.5638	0.7708
chr2:53173910-53173997	MLT1	tagging	partial	Prpf40a	protein_coding	0.3992	0.4992	0.5036	0.7008	0.5656	0.2803	0.3224
chr8:88626173-88626274	MLT1	tagging	partial	TCONS_00100948	protein_coding	0.0884	0.1326	0.0755	0	0	0	0
chr14:65185101-65185250	MLT1	tagging	partial	TCONS_00033051	lincRNA	0.2423	0.2272	0.194	0	0	0	0
chr1:142894618-142894967	MLT1	tagging	partial	TCONS_00006808	lincRNA	0.0049	0.0123	0.0105	0.0058	0	0	0
chr1:75150885-75151240	MLT1	tagging	partial	Fam134a	protein_coding	0.332	0.2108	0.06	0.8937	1.1267	0.437	0.1712
chr3:132437243-132437634	MLT1	tagging	partial	TCONS_00068722	lincRNA	0.0725	0.0577	0.0704	0.0273	0	0	0
chr13:15765883-15765986	MLT1	tagging	partial	TCONS_00026251	lincRNA	0.0116	0	0.0124	0	0	0	0
chr6:48398275-48398331	MLT1	tagging	partial	Krba1	protein_coding	0.0947	0.1185	0.0674	0.0149	0.1027	0.1182	0.0721
chr11:52543196-52543600	MLT1	tagging	partial	TCONS_00015296	lincRNA	0.7258	0.78	0.3753	0.0268	0.0692	0.0303	0.0691
chr10:9451455-9451551	MLT1	tagging	partial	TCONS_00011297	lincRNA	0.002	0.0017	0.0007	0	0.0013	0	0.001
chrX:11860179-11860250	MLT1	tagging	partial	TCONS_00110710	lincRNA	0.0806	0.0882	0.1613	0.0119	0	0	0
chr1:143747697-143747753	MLT1	tagging	partial	Glrx2	protein_coding	0.0302	0.0378	0.0215	0.1072	0.1946	0.0629	0.023
chr14:66159521-66159859	MLT1	tagging	partial	Ptk2b	protein_coding	0.1189	0.0929	0.0476	0.0176	0	0.0132	0.0226
chr16:30850350-30850446	MLT1	tagging	partial	TCONS_00041457	lincRNA	2.2512	2.719	2.5555	0.4414	0.067	0	0
chr19:3763310-3763465	MLT1	tagging	partial	TCONS_00053984	lincRNA	0.0482	0.0431	0.0589	0.0733	0.042	0.0553	0.0525
chr1:185366373-185366492	MLT1	tagging	partial	Eprs	protein_coding	0.5875	0.6429	0.3833	0.3859	0.423	0.1964	0.2299
chr4:151023125-151023341	MLT1	tagging	partial	TCONS_00072352	lincRNA	0.4647	0.5008	0.4644	0.1169	0.0101	0.0132	0.0188
chr6:52399346-52399476	MLT1	tagging	partial	TCONS_00087315	lincRNA	0.0177	0.0222	0.0341	0	0	0	0
chr2:4839431-4839533	MLT1	tagging	partial	TCONS_00055562	lincRNA	1.2532	1.2482	1.0266	0.1507	0.0037	0.0032	0
chrX:11859796-11859917	MLT1	tagging	partial	TCONS_00110710	lincRNA	0.0806	0.0882	0.1613	0.0119	0	0	0
chr3:101371385-101371540	MLT1	tagging	partial	TCONS_00065346	lincRNA	0.3137	0.1509	0.2061	0.1426	0	0	0
chr8:25445980-25446202	MLT1	tagging	partial	TCONS_00099638	lincRNA	1.1476	1.16	1.0413	0.0876	0.0656	0.017	0.0109
chr6:48398049-48398173	MLT1	tagging	partial	Krba1	protein_coding	0.0947	0.1185	0.0674	0.0149	0.1027	0.1182	0.0721
chr4:127735452-127735597	MLT1	tagging	partial	TCONS_00071468	lincRNA	0.0576	0.081	0.0231	0	0	0	0
chr7:129694626-129694764	MLT1	tagging	partial	lncRNA-OET-07-015	lincRNA	0	0	0.0211	1.0396	0.9642	1.2153	0.5794
chr11:16501360-16501516	MLT1	tagging	partial	Sec61g	protein_coding	2.373	4.8103	1.6265	0.2067	0.2031	0.3117	0.3044
chr1:97616624-97616830	MLT1	tagging	partial	D1Ertd622e	protein_coding	0.8689	0.656	0.5302	0.4873	0.0365	0.0107	0.0055
chr9:106162808-106162892	MLT1	tagging	partial	TCONS_00104223	lincRNA	0.0696	0.0652	0.0464	0	0.0354	0.0078	0.0132
chr4:153643117-153643231	MLT1	tagging	partial	TCONS_00076085	lincRNA	0.481	0.6015	0.2162	0.0299	0	0	0
chr12:77629426-77629704	MLT1	tagging	partial	TCONS_00025046	lincRNA	0.2268	0.2669	0.2207	0.0473	0	0	0.0051
chr14:123175746-123175845	MLT1	tagging	partial	TCONS_00033898	lincRNA	3.2002	3.6385	3.3175	0.5725	0.0358	0	0
chr14:66160324-66160422	MLT1	tagging	partial	Ptk2b	protein_coding	0.1189	0.0929	0.0476	0.0176	0	0.0132	0.0226
chr6:48131581-48131715	MLT1	tagging	partial	Gm16630	lincRNA	0.1838	0.1217	0.1731	0.0128	0	0	0
chrX:130657659-130657811	MLT1	tagging	partial	TCONS_00110036	lincRNA	0.0289	0.0181	0.027	0.0043	0	0.0064	0.0138
chr10:74697047-74697280	MLT1	tagging	partial	TCONS_00012616	protein_coding	0.0137	0.0123	0.0084	0	0.005	0	0
chr17:68160677-68160786	MLT1	tagging	partial	TCONS_00046387	lincRNA	0.2311	0.3533	0.2193	0.0152	0.0261	0	0
chr7:121587342-121587453	MLT1	tagging	partial	TCONS_00095332	lincRNA	0.1694	0.2082	0.1563	0.0271	0	0	0
chr8:14899838-14900065	MLT1	tagging	partial	Cln8	protein_coding	0.0246	0	0.0722	0.24	1.6694	1.3871	1.5974
chr4:131731550-131731686	MLT1	tagging	partial	TCONS_00075236	lincRNA	0.0388	0.1943	0.1866	0	0	0	0
chr8:128656641-128656725	MLT1	tagging	partial	TCONS_00098948	lincRNA	0.0365	0.0342	0.0389	0	0	0	0
chr13:11514419-11514508	MLT1	tagging	partial	TCONS_00028798	lincRNA	0.0053	0.0099	0.0084	0	0.0027	0	0
chr6:34186363-34186484	MLT1	tagging	partial	TCONS_00084164	lincRNA	0.3859	0.2681	0.1831	0.1014	0	0	0
chr14:24561592-24561683	MLT1	tagging	partial	TCONS_00031825	lincRNA	0.3242	0.3589	0.3641	0.0399	0.0034	0	0
chr13:37731412-37731764	MLT1	tagging	partial	TCONS_00026710	lincRNA	0.013	0.0489	0.0556	0.0154	0.0132	0	0.0198
chr2:10255679-10255866	MLT1	tagging	partial	Itih5	protein_coding	0	0	0	0	0	0	0.0507
chr6:52401265-52401492	MLT1	tagging	partial	TCONS_00087315	lincRNA	0.0177	0.0222	0.0341	0	0	0	0
chr12:41354036-41354127	MLT1	tagging	partial	TCONS_00022036	lincRNA	0.0044	0.0056	0.0047	0.0158	0	0	0.0237
chr2:151762058-151762411	MLT1	tagging	partial	TCONS_00058321	protein_coding	0.0661	0.0414	0.0212	0.0156	0.0067	0	0.005
chr3:102147478-102147586	MLT1	tagging	partial	Casq2	protein_coding	0.4727	0.8868	0.996	0.2059	0.0253	0.0111	0.0379
chr13:43119272-43119357	MLT1	tagging	partial	TCONS_00029486	lincRNA	0.0905	0.1456	0.0967	0.0306	0	0	0.0099
chr3:10393566-10393699	MLT1	tagging	partial	Chmp4c	protein_coding	0	0	0.0188	0.0139	0.0419	0.1888	0.3136
chr14:69349606-69349681	MLT1	tagging	partial	Entpd4	protein_coding	0.0673	0.1823	0.0359	0.0133	0	0	0.0085
chr6:48398462-48398555	MLT1	tagging	partial	Krba1	protein_coding	0.0947	0.1185	0.0674	0.0149	0.1027	0.1182	0.0721
chr9:100982040-100982173	MLT1	tagging	partial	Pccb	protein_coding	2.6774	3.2966	1.5829	0.5357	2.2611	0.8444	0.847
chr8:25446399-25446485	MLT1	tagging	partial	TCONS_00099638	lincRNA	1.1476	1.16	1.0413	0.0876	0.0656	0.017	0.0109
chr10:74696795-74696870	MLT1	tagging	partial	TCONS_00012616	protein_coding	0.0137	0.0123	0.0084	0	0.005	0	0
chr12:7296965-7297365	MLT1	tagging	partial	TCONS_00023693	lincRNA	0.1068	0.1737	0.1255	0	0	0	0
chr10:17849789-17849889	MLT1	tagging	partial	TCONS_00011481	lincRNA	0.0447	0.04	0.0136	0	0	0	0
chr12:84601008-84601072	MLT1	tagging	partial	Abcd4	protein_coding	0.2713	0.2423	0.2207	0.0916	0.0263	0.2073	0.2066
chr17:16414424-16414775	MLT1	tagging	partial	TCONS_00044949	lincRNA	0.1004	0	0.0858	0	0	0	0
chr5:45529069-45529145	MLT1	tagging	partial	Med28	protein_coding	12.1761	15.3908	8.9572	1.4825	1.0072	0.5865	0.2948
chr15:23709468-23709692	MLT1	tagging	partial	TCONS_00038647	lincRNA	0.0914	0.1143	0.103	0	0	0	0
chr5:108371471-108371629	MLT1	tagging	partial	TCONS_00082142	lincRNA	0.0399	0.0997	0.1064	0	0	0	0
chr14:69567856-69567931	MLT1	tagging	partial	Gm21685	protein_coding	0.0561	0.1122	0.0359	0.0133	0	0.01	0
chr18:44357809-44357901	MLT1	tagging	partial	Myot	protein_coding	0.1145	0.0806	0.1223	0.0339	0	0	0
chr9:113604457-113604596	MLT1	tagging	partial	TCONS_00107491	lincRNA	1.1583	1.3207	1.4911	0.2014	0.1385	0	0
chr7:30866846-30866925	MLT1	tagging	partial	TCONS_00090178	lincRNA	0.0112	0.014	0.0119	0	2.021	2.1305	0.2722
chr8:66892017-66892142	MLT1	tagging	partial	Naf1	protein_coding	0.1252	0.1479	0.1262	0.1727	0.6293	0.2232	0.1272
chr8:126070273-126070304	MLT1	tagging	partial	TCONS_00098895	lincRNA	0.0085	0.0106	0.013	0	0.0012	0	0.0009
chr6:115578443-115578576	MLT1	tagging	partial	Tsen2	protein_coding	0.0327	0.0409	0.0349	0.1741	0.2827	0.1021	0.0436
chr13:43118191-43118492	MLT1	tagging	partial	TCONS_00029486	lincRNA	0.0905	0.1456	0.0967	0.0306	0	0	0.0099
chrX:100610613-100610906	MLT1	tagging	partial	Pdzd11	protein_coding	0.3747	0.4481	0.3075	0.1689	0.169	0.0689	0.0713
chr5:77448336-77448473	MLT1	tagging	partial	Gm34728	lincRNA	0.3968	0.5514	0.6589	0.2172	0	0	0
chr1:11269171-11269268	MLT1	tagging	partial	Prex2	protein_coding	0.1292	0.5926	0.4139	0.0509	0	0	0
chr16:30853274-30853429	MLT1	tagging	partial	TCONS_00041458	lincRNA	0.6006	0.6426	0.6213	0.1318	0.0252	0	0
chr14:31462890-31463161	MLT1	tagging	partial	TCONS_00034456	lincRNA	0.1666	0.2638	0.1659	0.105	0.0339	0	0.0085
chr14:74527168-74527286	MLT1	tagging	partial	TCONS_00035508	lincRNA	0.0809	0.059	0.036	0.0439	0.0034	0	0
chr6:145993884-145994154	MLT1	tagging	partial	TCONS_00089034	lincRNA	0	0.72	0.8536	0.3025	0.0325	0	0
chr11:67065626-67065744	MLT1	tagging	partial	Sco1	protein_coding	0.0177	0	0.0189	0.1677	0.1262	0.079	0.1891
chr5:37086395-37086541	MLT1	tagging	partial	Jakmip1	protein_coding	1.511	1.2929	0.7471	0.2633	0	0.0567	0.0606
chr18:4712703-4712753	MLT1	tagging	partial	TCONS_00051023	lincRNA	0.0306	0	0.0218	0	0.0104	0	0
chr10:108543445-108543560	MLT1	tagging	partial	TCONS_00010385	lincRNA	6.0788	6.4181	4.1965	0.4303	0	0	0
chr5:77180715-77180840	MLT1	tagging	partial	TCONS_00081510	lincRNA	0.0573	0	0	0	0.0194	0	0
chr6:148607474-148607787	MLT1	tagging	partial	Gm6313	lincRNA	0.0133	0	0	0	0	0	0
chr12:25828161-25828298	MLT1	tagging	partial	TCONS_00024134	lincRNA	0.0325	0.0507	0.052	0.0192	0	0	0
chr15:77623554-77623685	MLT1	tagging	partial	TCONS_00037393	protein_coding	0.3947	0.4833	0.3248	0.0486	0.0084	0	0
chr5:77180367-77180479	MLT1	tagging	partial	TCONS_00081510	lincRNA	0.0573	0	0	0	0.0194	0	0
chr1:152351416-152351767	MLT1	tagging	partial	TCONS_00003055	lincRNA	0.0203	0.0422	0.1082	0.008	0	0	0
chr10:13515145-13515438	MLT1	tagging	partial	Fuca2	protein_coding	0	0	0	0.1015	0.1745	0.4972	1.8953
chr7:19245959-19246274	MLT1	tagging	partial	Opa3	protein_coding	1.4245	1.1277	0.9955	0.6421	1.323	0.7673	0.6712
chr14:55231799-55232066	MLT1	tagging	partial	TCONS_00035076	lincRNA	0.0458	0.1261	0.0391	0	0	0	0
chr13:48750637-48750723	MLT1	tagging	partial	TCONS_00027011	lincRNA	0	0	0.0509	0	0	0	0
chr6:112618685-112618920	MLT1	tagging	partial	Rad18	protein_coding	0.3615	0.4026	0.3437	0.4875	0.2354	0.1259	0.1721
chr12:8874897-8875232	MLT1	tagging	partial	9930038B18Rik	lincRNA	0.6585	0.9517	0.7668	0.1517	0	0	0
chr9:104545953-104546095	MLT1	tagging	partial	TCONS_00104190	lincRNA	0.2191	0.3397	0.2759	0.0311	0.0045	0	0
chr2:150716581-150716897	MLT1	tagging	partial	TCONS_00062323	protein_coding	0.0095	0.0239	0.0204	0.0902	0.0485	0.119	0.3341
chr19:26483377-26483412	MLT1	tagging	partial	TCONS_00054724	lincRNA	0.6568	0.6735	0.575	0.1553	0.0534	0	0
chr10:60101540-60101883	MLT1	tagging	partial	Ascc1	protein_coding	0.8601	1.093	0.6516	0.0984	0.0846	0.0247	0.0951
chr8:18806418-18806539	MLT1	tagging	partial	Mcph1	protein_coding	1.7492	1.923	1.621	0.5852	0.3957	0.1756	0.0878
chr11:67065886-67066128	MLT1	tagging	partial	Sco1	protein_coding	0.0177	0	0.0189	0.1677	0.1262	0.079	0.1891
chr14:22613258-22613579	MLT1	tagging	partial	1700112E06Rik	protein_coding	0.07	0.0437	0.0432	0.0044	0	0	0
chr1:47259276-47259374	MLT1	tagging	partial	TCONS_00004902	lincRNA	0	0.0227	0.0582	0	0	0	0
chr12:73808696-73808983	MLT1	tagging	partial	TCONS_00022527	lincRNA	0.5798	0.5801	0.6465	0.1219	0.0065	0	0
chr7:134503926-134504255	MLT1	tagging	partial	TCONS_00092321	lincRNA	0.0868	0.2103	0.0753	0	0	0	0
chr8:121865904-121866167	MLT1	tagging	partial	TCONS_00098732	lincRNA	0.0175	0.0438	0.028	0.2173	0.1067	0.0234	0
chr13:45079799-45080132	MLT1	tagging	partial	Gm9817	protein_coding	0.5676	0.4889	0.2423	1.0438	0.0769	0.0562	0.1921
chr10:91588848-91589161	MLT1	tagging	partial	TCONS_00010096	lincRNA	0.0209	0.0261	0.0558	0.0041	0	0	0
chr1:71753842-71753946	MLT1	tagging	partial	TCONS_00001389	lincRNA	0.081	0.1164	0.1556	0.0431	0.0082	0	0
chr11:61148652-61148769	MLT1	tagging	partial	Tnfrsf13b	protein_coding	0.0652	0.0204	0.0174	0.5593	0.4809	0.0436	0.0373
chr14:74526962-74527056	MLT1	tagging	partial	TCONS_00035508	lincRNA	0.0809	0.059	0.036	0.0439	0.0034	0	0
chr10:13006231-13006488	MLT1	tagging	partial	Sf3b5	protein_coding	4.0558	4.4274	0.763	1.8964	1.47	0.8889	0.8418
chr14:122163637-122163847	MLT1	tagging	partial	TCONS_00033879	lincRNA	0.2247	0.2514	0.221	0.1958	0.1082	0	0.009
chr5:65643296-65643659	MLT1	tagging	partial	Pds5a	protein_coding	0.1479	0.1189	0.1128	0.5497	0.666	0.2072	0.4426
chr2:69118881-69118991	MLT1	tagging	partial	TCONS_00060728	lincRNA	0.0838	0.1178	0.1006	0.0124	0	0.0093	0.0159
chr14:75679027-75679191	MLT1	tagging	partial	TCONS_00035554	lincRNA	0.336	0.3362	0.287	0	0	0	0
chr19:26483123-26483348	MLT1	tagging	partial	TCONS_00054724	lincRNA	0.6568	0.6735	0.575	0.1553	0.0534	0	0
chr16:31284711-31284963	MLT1	tagging	partial	TCONS_00043276	lincRNA	0.0266	0.0221	0.0284	0	0	0	0.0067
chr16:95969041-95969299	MLT1	tagging	partial	TCONS_00042497	lincRNA	0.0775	0.0484	0.0414	0.0229	0	0	0.0443
chr1:162729482-162729730	MLT1	tagging	partial	Prrc2c	protein_coding	0.0152	0.019	0.0648	0.1076	0.1079	0.2028	0.0346
chr15:4517476-4517687	MLT1	tagging	partial	Plcxd3	protein_coding	0.0757	0.0631	0.0898	0.0199	0	0	0.0064
chr1:161101731-161101892	MLT1	tagging	partial	Klhl20	protein_coding	0.0452	0.0754	0.0724	0.1069	0.0459	0.0336	0.0861
chr14:39455367-39455729	MLT1	tagging	partial	TCONS_00034622	protein_coding	0.0177	0.0253	0.0054	0.006	0	0	0
chr13:48488746-48489045	MLT1	tagging	partial	Zfp169	protein_coding	0.6878	0.575	0.6476	0.0777	0.0039	0	0.0029
chr7:114930892-114931234	MLT1	tagging	partial	TCONS_00095184	lincRNA	0.0175	0	0.0093	0	0.0089	0	0
chr3:146446868-146447245	MLT1	tagging	partial	TCONS_00066087	lincRNA	0	0.024	0.0103	0	0.0098	0.0171	0.0073
chr5:3643272-3643505	MLT1	tagging	partial	Gatad1	protein_coding	1.3441	1.5608	1.1274	0.227	0.3904	0.5135	1.0968
chr3:95189942-95190102	MLT1	tagging	partial	Gabpb2	protein_coding	0.0349	0.0436	0.1117	0.5225	0.6029	0.1244	0.3011
chr7:122038153-122038538	MLT1	tagging	partial	Ears2	protein_coding	0.0984	0.1641	0.1051	0.2521	0.1834	0.2193	0.2749
chr5:143399089-143399195	MLT1	tagging	partial	Gm42504	lincRNA	0	0.0172	0.0294	0.0163	0.014	0	0.021
chr9:18856462-18856587	MLT1	tagging	partial	TCONS_00102316	protein_coding	0.0122	0	0	0	0	0	0
chr10:13006027-13006101	MLT1	tagging	partial	Sf3b5	protein_coding	4.0558	4.4274	0.763	1.8964	1.47	0.8889	0.8418
chr16:11598364-11598434	MLT1	tagging	partial	CUFF.18671.1	lincRNA	0	0.4202	0.4484	0.1986	0.427	0	0
chr13:11519558-11519837	MLT1	tagging	partial	TCONS_00028798	lincRNA	0.0053	0.0099	0.0084	0	0.0027	0	0
chr7:133319724-133319885	MLT1	tagging	partial	TCONS_00095694	lincRNA	0.2539	0.2005	0.1712	0	0	0	0
chr19:26482601-26482764	MLT1	tagging	partial	TCONS_00054724	lincRNA	0.6568	0.6735	0.575	0.1553	0.0534	0	0
chr17:17833969-17834106	MLT1	tagging	partial	Spaca6	protein_coding	0	0	0	0.0278	0.1354	0.1676	0.3521
chr18:65750975-65751215	MLT1	tagging	partial	Oacyl	protein_coding	1.2233	1.117	0.7877	0.3214	0	0.0173	0.0296
chr18:65751255-65751350	MLT1	tagging	partial	Oacyl	protein_coding	1.2233	1.117	0.7877	0.3214	0	0.0173	0.0296
chr2:158310277-158310381	MLT1	tagging	partial	Lbp	protein_coding	0	0	0	0.4166	0.0358	0	0
chr2:128612122-128612416	MLT1	tagging	partial	Anapc1	protein_coding	2.3511	1.5105	1.1973	0.6503	0.7126	0.3941	0.5832
chr4:5114159-5114500	MLT1	tagging	partial	TCONS_00069171	lincRNA	0.0596	0.0931	0.0795	0	0	0	0
chr12:105212894-105213178	MLT1	tagging	partial	Tcl1b4	protein_coding	1.3526	1.1632	1.3191	0.1806	0.0091	0	0.0103
chr3:138030136-138030350	MLT1	tagging	partial	TCONS_00068798	lincRNA	0.0941	0.0448	0.0239	0	0	0	0
chr3:102147586-102147716	MLT1	tagging	partial	Casq2	protein_coding	0.4727	0.8868	0.996	0.2059	0.0253	0.0111	0.0379
chr12:91386512-91386574	MLT1	tagging	partial	CUFF.11133.1	lincRNA	0.0494	0.0353	0.0527	0.0083	0.0143	0.0315	0.0323
chr8:62360001-62360237	MLT1	tagging	partial	TCONS_00097278	lincRNA	0.1244	0.0311	0.0443	0	0	0	0
chr17:65632128-65632464	MLT1	tagging	partial	Txndc2	protein_coding	3.7435	4.0119	3.0194	0.6419	0.0309	0	0
chr14:122163930-122164148	MLT1	tagging	partial	TCONS_00033879	lincRNA	0.2247	0.2514	0.221	0.1958	0.1082	0	0.009
chr9:110263062-110263202	MLT1	tagging	partial	TCONS_00107423	lincRNA	0.1659	0.1085	0.0817	0.0513	0.0467	0.0205	0.0136
chr5:5902226-5902280	MLT1	tagging	partial	TCONS_00076326	lincRNA	0.2477	0.6075	0.9661	0.1689	0.0387	0	0
chr12:107069908-107070058	MLT1	tagging	partial	TCONS_00025629	lincRNA	0.0529	0.0661	0.0752	0	0	0	0
chr10:72669566-72669704	MLT1	tagging	partial	Zwint	protein_coding	0.4896	0.4855	0.4145	0.2195	0.3089	0.5567	0.4371
chr11:73087205-73087411	MLT1	tagging	partial	1200014J11Rik	protein_coding	0.6645	0.6424	0.4696	0.4037	0.3534	0.1618	0.1171
chr10:14649595-14649819	MLT1	tagging	partial	TCONS_00008294	protein_coding	0.0288	0.018	0.0358	0.034	0.0146	0.0128	0.0219
chr7:80890789-80891036	MLT1	tagging	partial	Wdr73	protein_coding	1.8046	2.15	1.5359	1.9173	2.1443	0.7173	0.3807
chr7:129531732-129531879	MLT1	tagging	partial	TCONS_00095613	lincRNA	0.1168	0.1169	0.0499	0.0138	0	0	0
chr1:34446091-34446278	MLT1	tagging	partial	Imp4	protein_coding	2.7267	2.9546	2.3381	1.2683	1.4995	0.6603	0.4961
chr8:18803498-18803618	MLT1	tagging	partial	TCONS_00099372	lincRNA	0.6229	0.5193	0.7203	0.675	0.3694	0.0463	0.0395
chr2:6472009-6472135	MLT1	tagging	partial	Gm13391	lincRNA	2.9467	2.0179	2.3966	0.2488	0	0	0
chr5:30791756-30792007	MLT1	tagging	partial	TCONS_00080612	lincRNA	0.0624	0.0638	0.0848	0.0335	0.0058	0	0
chr9:20468887-20469156	MLT1	tagging	partial	Zfp426	protein_coding	0.8631	1.4046	1.4767	0.3914	0.2043	0.1581	0.1711
chr1:20839230-20839542	MLT1	tagging	partial	TCONS_00004330	lincRNA	0.2956	0.2541	0.1972	0.0437	0	0.0165	0
chr18:42684953-42685032	MLT1	tagging	partial	Ppp2r2b	protein_coding	0.9819	0.7913	1.0482	0.1032	0	0	0
chr16:4432215-4432540	MLT1	tagging	partial	TCONS_00040642	lincRNA	0.0044	0.0713	0.1405	0.0104	0.0045	0	0
chr8:103519886-103520331	MLT1	tagging	partial	TCONS_00101177	lincRNA	0.0637	0.1036	0.0408	0.0151	0.0065	0	0.0049
chr6:6602621-6602781	MLT1	tagging	partial	TCONS_00086483	lincRNA	0.0196	0.0491	0	0	0	0	0
chr6:88942274-88942300	MLT1	tagging	partial	TCONS_00085292	lincRNA	0.2031	0.1172	0.0751	0.0647	0.0079	0	0
chr6:88942113-88942238	MLT1	tagging	partial	TCONS_00085292	lincRNA	0.2031	0.1172	0.0751	0.0647	0.0079	0	0
chr17:10088996-10089201	MLT1	tagging	partial	TCONS_00047049	lincRNA	0.2715	0.1726	0.1867	0.0109	0	0	0.0035
chr5:127581386-127581601	MLT1	tagging	partial	TCONS_00079300	lincRNA	2.2664	3.0953	2.1964	0.1555	0.0315	0.0069	0
chr6:85945218-85945598	MLT1	tagging	partial	Dusp11	protein_coding	0.1217	0.1594	0.1546	0.0685	0.1767	0.439	0.534
chr9:73360605-73360715	MLT1	tagging	partial	TCONS_00103603	lincRNA	0.0161	0.0402	0.0193	0.0071	0	0	0
chr7:120183418-120183749	MLT1	tagging	partial	TCONS_00091944	protein_coding	4.202	4.8416	4.4031	0.4569	0.1286	0.0188	0
chr18:33386179-33386277	MLT1	tagging	partial	TCONS_00051480	protein_coding	0.3772	0.6118	0.6937	0.1678	0.0152	0.0033	0
chr10:120321224-120321419	MLT1	tagging	partial	TCONS_00010744	lincRNA	0.3096	0.3291	0.1157	0.0366	0	0	0
chr5:5666963-5667261	MLT1	tagging	partial	Steap2	protein_coding	1.9191	1.4813	0.3267	0.0724	0.0146	0.0032	0.0055
chr12:73809061-73809136	MLT1	tagging	partial	TCONS_00022527	lincRNA	0.5798	0.5801	0.6465	0.1219	0.0065	0	0
chr1:46661166-46661321	MLT1	tagging	partial	Dnah7c	protein_coding	5.0344	5.8186	4.7024	0.7665	0.0097	0.0085	0
chrX:38166938-38167327	MLT1	tagging	partial	TCONS_00111464	lincRNA	0.0302	0.0324	0.0184	0.0306	0.0088	0	0
chr13:48751127-48751298	MLT1	tagging	partial	TCONS_00027011	lincRNA	0	0	0.0509	0	0	0	0
chr11:61148420-61148635	MLT1	tagging	partial	Tnfrsf13b	protein_coding	0.0652	0.0204	0.0174	0.5593	0.4809	0.0436	0.0373
chr9:14884713-14884981	MLT1	tagging	partial	TCONS_00105089	lincRNA	0.1495	0.088	0.0563	0.0104	0	0	0
chr10:9483593-9483929	MLT1	tagging	partial	TCONS_00011297	lincRNA	0.002	0.0017	0.0007	0	0.0013	0	0.001
chr3:138159053-138159182	MLT1	tagging	partial	Trmt10a	protein_coding	0.1229	0.1537	0.1093	0.1332	0.354	0.2921	0.2106
chr1:57408832-57409127	MLT1	tagging	partial	9430016H08Rik	protein_coding	0.0131	0.0082	0.007	0.1704	0.2796	0.2569	0.1297
chrX:151779341-151779666	MLT1	tagging	partial	TCONS_00113144	lincRNA	0.0997	0.0534	0.0912	0.0168	0	0	0
chr13:48486265-48486335	MLT1	tagging	partial	Zfp169	protein_coding	0.6878	0.575	0.6476	0.0777	0.0039	0	0.0029
chr1:97619456-97619634	MLT1	tagging	partial	D1Ertd622e	protein_coding	0.8689	0.656	0.5302	0.4873	0.0365	0.0107	0.0055
chr6:145456494-145456818	MLT1	tagging	partial	TCONS_00086292	lincRNA	0.04	0.0438	0.0374	0.0237	0	0	0.0038
chr17:75391486-75391820	MLT1	tagging	partial	Ltbp1	protein_coding	0	0	0.0159	0	0	0	0
chr5:97295621-97295913	MLT1	tagging	partial	TCONS_00081846	lincRNA	0.0379	0.0316	0.0135	0.0149	0	0	0
chr14:70873417-70873544	MLT1	tagging	partial	2410012E07Rik	lincRNA	0.0352	0	0.0752	0	0	0.1256	0.161
chr18:4712776-4712879	MLT1	tagging	partial	TCONS_00051023	lincRNA	0.0306	0	0.0218	0	0.0104	0	0
chr3:145714401-145714582	MLT1	tagging	partial	TCONS_00068926	lincRNA	0.0171	0.0641	0.0365	0.0101	0	0	0
chr18:73990018-73990365	MLT1	tagging	partial	TCONS_00050636	lincRNA	0.1292	0.1172	0.1311	0.0611	0.0066	0	0.0025
chr6:52397683-52397836	MLT1	tagging	partial	TCONS_00087315	lincRNA	0.0177	0.0222	0.0341	0	0	0	0
chr4:33707536-33707910	MLT1	tagging	partial	TCONS_00073209	lincRNA	0.0493	0.019	0.0284	0.0045	0	0	0
chr14:29951165-29951498	MLT1	tagging	partial	TCONS_00031993	lincRNA	0.0169	0.0371	0.0226	0.0501	0.0129	0.0075	0.0064
chr19:9111279-9111399	MLT1	tagging	partial	Asrgl1	protein_coding	0.1051	0.0478	0.0816	0.0226	0.0097	0.0085	0.0582
chr17:26984472-26984557	MLT1	tagging	partial	Ggnbp1	protein_coding	0.0463	0.0174	0.0198	0.0492	0.0329	0.0124	0.0176
chr1:188583202-188583504	MLT1	tagging	partial	lncRNA-OET-01-320	lincRNA	0.0023	0	0.0321	0.0685	0.0047	0.0062	0.0071
chr5:42987415-42987773	MLT1	tagging	partial	TCONS_00077293	lincRNA	0.0162	0.099	0.1019	0.0024	0	0	0
chr19:57130283-57130565	MLT1	tagging	partial	Ablim1	protein_coding	1.6755	1.8195	0.7531	0.1043	0	0.0393	0.0336
chr16:77958407-77958752	MLT1	tagging	partial	TCONS_00044037	lincRNA	0.0517	0.0647	0.0276	0	0	0	0
chr10:21781121-21781290	MLT1	tagging	partial	TCONS_00008466	lincRNA	0.0518	0	0.0553	0	0	0	0
chr1:79995146-79995413	MLT1	tagging	partial	TCONS_00001588	lincRNA	0.2233	0.1883	0.255	0.3561	0.0845	0.0324	0.0119
chr18:75522178-75522412	MLT1	tagging	partial	TCONS_00050682	lincRNA	2.2993	2.1216	1.8587	0.4751	0.2496	0.0597	0.051
chr3:136047337-136047504	MLT1	tagging	partial	TCONS_00065876	lincRNA	0.3715	0.4803	0.3898	0.2382	0.0064	0	0.0048
chr9:99356882-99357234	MLT1	tagging	partial	Esyt3	protein_coding	0.7336	0.5396	0.4491	0.4081	0.1316	0.1058	0.1232
chr19:9110906-9111050	MLT1	tagging	partial	Asrgl1	protein_coding	0.1051	0.0478	0.0816	0.0226	0.0097	0.0085	0.0582
chr6:6602392-6602598	MLT1	tagging	partial	TCONS_00086483	lincRNA	0.0196	0.0491	0	0	0	0	0
chr13:24908527-24908643	MLT1	tagging	partial	Aldh5a1	protein_coding	0.6022	0.2955	0.3092	0.1352	0.0232	0.0204	0.029
chr12:89837026-89837282	MLT1	tagging	partial	TCONS_00025350	lincRNA	0.0338	0.0211	0.012	0.0067	0	0	0
chr13:57596525-57596927	MLT1	tagging	partial	CUFF.12857.1	lincRNA	0.0176	0.011	0.0094	0.0208	0	0	0
chr3:145714742-145714968	MLT1	tagging	partial	TCONS_00068926	lincRNA	0.0171	0.0641	0.0365	0.0101	0	0	0
chr19:9111175-9111222	MLT1	tagging	partial	Asrgl1	protein_coding	0.1051	0.0478	0.0816	0.0226	0.0097	0.0085	0.0582
chr18:53639131-53639494	MLT1	tagging	partial	TCONS_00050278	lincRNA	0.0601	0.1692	0.0321	0.0356	0	0	0
chr14:39009259-39009535	MLT1	tagging	partial	TCONS_00034603	lincRNA	0.0439	0.0549	0.0156	0.0086	0.0074	0	0
chr8:108367533-108367648	MLT1	tagging	partial	TCONS_00098309	lincRNA	0.0424	0.0186	0.0158	0	0.0022	0	0
chr16:4715867-4716002	MLT1	tagging	partial	Nmral1	protein_coding	1.2571	0.6176	0.3355	0.1592	0.2282	0.04	0.171
chr14:48092204-48092340	MLT1	tagging	partial	TCONS_00034885	lincRNA	0.1124	0	0.04	0.0443	0	0	0
chr1:188591902-188591991	MLT1	tagging	partial	lncRNA-OET-01-320	lincRNA	0.0023	0	0.0321	0.0685	0.0047	0.0062	0.0071
chr11:59486057-59486452	MLT1	tagging	partial	TCONS_00018915	protein_coding	10.668	11.3691	6.7748	1.4942	0.4697	0.3149	0.4865
chr5:78268096-78268498	MLT1	tagging	partial	TCONS_00077829	lincRNA	0.0149	0.0083	0.0053	0.0098	0.0017	0.0044	0.0038
chr13:15460487-15460742	MLT1	tagging	partial	NOMERGE_TCONS_00000410	lincRNA	0.2458	0.1272	0.1086	0.1704	0.0086	0	0
chr2:24961582-24961652	MLT1	tagging	partial	Zmynd19	protein_coding	10.5031	10.9918	7.637	5.9441	4.3495	0.4758	0.4196
chr11:10846031-10846163	MLT1	tagging	partial	TCONS_00014513	lincRNA	0.4363	0.5456	0.3756	0.0166	0	0	0
chr9:68176320-68176518	MLT1	tagging	partial	TCONS_00106476	protein_coding	0.2288	0.2673	0.1093	0.0107	0.0092	0	0
chr9:113609924-113610179	MLT1	tagging	partial	TCONS_00107494	lincRNA	0.1001	0.153	0.1425	0.0263	0.0226	0	0
chr6:25837391-25837510	MLT1	tagging	partial	TCONS_00083970	lincRNA	0.0171	0.0053	0.0023	0	0.0022	0	0
chr3:33816542-33816605	MLT1	tagging	partial	Ttc14	protein_coding	0.056	0.035	0.0726	0.3644	0.3581	0.2712	0.2561
chr1:188589822-188590228	MLT1	tagging	partial	lncRNA-OET-01-320	lincRNA	0.0023	0	0.0321	0.0685	0.0047	0.0062	0.0071
chr13:54592696-54592985	MLT1	tagging	partial	Cltb	protein_coding	13.467	15.5287	8.8906	2.7337	0.8923	0.229	0.1304
chr8:87186516-87186676	MLT1	tagging	partial	Gm10637	lincRNA	0.3847	0.3981	0.3399	0.0366	0	0	0
chrX:74294628-74294895	MLT1	tagging	partial	TCONS_00109318	lincRNA	0.1196	0.1495	0.1702	0.0942	0.2836	0	0
chr8:114135037-114135181	MLT1	tagging	partial	Nudt7	protein_coding	2.4866	3.9197	3.2899	0.4969	0.0356	0.0156	0.1067
chr8:42610775-42610937	MLT1	tagging	partial	TCONS_00100133	lincRNA	0.0105	0.0059	0.0041	0	0	0.0008	0
chr10:70701228-70701578	MLT1	tagging	partial	TCONS_00012571	lincRNA	0.0664	0.0484	0.0531	0.0065	0.0112	0.0049	0
chr6:111586992-111587132	MLT1	tagging	partial	TCONS_00088311	lincRNA	0.4955	0.6019	0.5742	0.0837	0.0144	0	0
chr6:111587206-111587301	MLT1	tagging	partial	TCONS_00088311	lincRNA	0.4955	0.6019	0.5742	0.0837	0.0144	0	0
chr5:123104003-123104164	MLT1	tagging	partial	Rhof	protein_coding	0.6664	0.5914	0.3442	0.3812	0.2185	0.1341	0.0819
chr16:92194402-92194791	MLT1	tagging	partial	TCONS_00042404	lincRNA	0.0692	0.0601	0.0534	0.0273	0.0039	0.0051	0.0029
chr5:150867361-150867485	MLT1	tagging	partial	Kl	protein_coding	0.0793	0.0992	0.1482	0.0234	0.0202	0	0
chr11:120674163-120674258	MLT1	tagging	partial	Aspscr1	protein_coding	1.0844	1.2122	0.3858	0.2719	0.4008	0.2343	0.2878
chr15:63929604-63929776	MLT1	tagging	partial	Fam49b	protein_coding	0.0124	0	0.0264	0.0877	0.0377	0.1542	0.273
chr1:42748749-42748931	MLT1	tagging	partial	TCONS_00000835	lincRNA	0.0233	0.035	0.0398	0.0055	0	0	0
chr12:86572588-86572715	MLT1	tagging	partial	TCONS_00022876	lincRNA	0.0408	0.0468	0.0327	0	0	0.003	0
chr14:18298163-18298507	MLT1	tagging	partial	TCONS_00031699	lincRNA	0.3216	0.39	0.4213	0.1844	0.1189	0.0565	0.0668
chr11:5205939-5206110	MLT1	tagging	partial	Kremen1	protein_coding	0	0	0.0595	0.1053	0.1132	0.0695	0.0933
chr12:17099233-17099453	MLT1	tagging	partial	TCONS_00021459	lincRNA	0.0317	0.0274	0.0269	0.0106	0.0008	0	0
chr6:148662304-148662660	MLT1	tagging	partial	TCONS_00089113	lincRNA	3.3127	2.3182	2.4006	1.0045	0.0785	0.0078	0
chr5:34597336-34597636	MLT1	tagging	partial	Add1	protein_coding	0.2877	0.1727	0.2825	0.0544	0.0585	0.0308	0.1315
chr13:15460324-15460455	MLT1	tagging	partial	NOMERGE_TCONS_00000410	lincRNA	0.2458	0.1272	0.1086	0.1704	0.0086	0	0
chr14:72651051-72651284	MLT1	tagging	partial	Fndc3a	protein_coding	0.3927	0.2526	0.3354	0.1061	0.0456	0.01	0.1282
chr14:102455650-102456076	MLT1	tagging	partial	TCONS_00033589	lincRNA	0.1167	0.1333	0.0975	0.018	0	0	0
chr7:43592775-43593126	MLT1	tagging	partial	Zfp719	protein_coding	0.0443	0.0277	0.0413	0.3793	0.0787	0.1183	0.0885
chr16:43828412-43828828	MLT1	tagging	partial	Drd3	protein_coding	0.0198	0.0124	0.0369	0.1461	0.1759	0.0308	0.0188
chr16:9055460-9055572	MLT1	tagging	partial	TCONS_00040883	lincRNA	0.0294	0.0736	0	0	0	0.0393	0
chr14:76365953-76366127	MLT1	tagging	partial	TCONS_00035586	lincRNA	0.0901	0.0433	0.0592	0.0246	0	0	0
chr8:43294530-43294582	MLT1	tagging	partial	Zfp42	protein_coding	0.0509	0.0796	0.0543	1.3688	0.7889	2.563	2.4516
chr16:5429800-5429962	MLT1	tagging	partial	TCONS_00040729	lincRNA	0.161	0.1007	0.0645	0	0	0.0179	0
chr2:103140618-103141028	MLT1	tagging	partial	TCONS_00057284	lincRNA	0.0597	0.0427	0.1002	0.0303	0	0	0
chr12:26240466-26240869	MLT1	tagging	partial	TCONS_00021797	lincRNA	0.0902	0.0903	0.0578	0	0	0	0
chr2:158757829-158758080	MLT1	tagging	partial	Ppp1r16b	protein_coding	0.0145	0.0182	0.0155	0.0687	0.3988	0	0
chr5:29684554-29684724	MLT1	tagging	partial	TCONS_00080584	lincRNA	0.0265	0.0398	0.0453	0.1003	0.3287	0.0945	0.0646
chr15:10868516-10868821	MLT1	tagging	partial	TCONS_00038483	lincRNA	0.0422	0.0615	0.0525	0	0	0	0
chr1:191791405-191791670	MLT1	tagging	partial	TCONS_00007962	lincRNA	0.032	0.016	0.0205	0	0	0.0057	0.0049
chr16:9055787-9056023	MLT1	tagging	partial	TCONS_00040883	lincRNA	0.0294	0.0736	0	0	0	0.0393	0
chr18:76808260-76808572	MLT1	tagging	partial	TCONS_00052329	lincRNA	0.4849	0.2021	0.4745	0.0478	0.0411	0	0
chr5:117770345-117770481	MLT1	tagging	partial	Ksr2	protein_coding	0.9866	0.8788	0.7719	0.0719	0.0034	0.003	0.0026
chr1:42748494-42748722	MLT1	tagging	partial	TCONS_00000835	lincRNA	0.0233	0.035	0.0398	0.0055	0	0	0
chr8:114134737-114134962	MLT1	tagging	partial	Nudt7	protein_coding	2.4866	3.9197	3.2899	0.4969	0.0356	0.0156	0.1067
chr8:121976175-121976255	MLT1	tagging	partial	Banp	protein_coding	4.7232	3.3266	2.1443	1.027	0.4967	0.7259	0.4135
chr11:119906935-119907289	MLT1	tagging	partial	TCONS_00020939	lincRNA	0.0164	0.0257	0.0219	0.1748	0.0418	0.0037	0.0188
chr19:56151792-56151969	MLT1	tagging	partial	TCONS_00053865	lincRNA	0.0724	0.1056	0.0772	0	0	0	0
chr2:32706386-32706460	MLT1	tagging	partial	Cdk9	protein_coding	0.4841	0.5575	0.5031	5.3313	2.1236	0.704	0.6015
chr14:61364790-61364999	MLT1	tagging	partial	Kpna3	protein_coding	8.2659	8.9195	7.8709	3.0005	0.4971	0.6572	0.5911
chr12:17099778-17099958	MLT1	tagging	partial	TCONS_00021459	lincRNA	0.0317	0.0274	0.0269	0.0106	0.0008	0	0
chr12:9154910-9155308	MLT1	tagging	partial	TCONS_00021226	lincRNA	0.101	0.0505	0.0108	0	0	0	0
chr2:165377497-165377768	MLT1	tagging	partial	Zfp334	protein_coding	3.2036	3.1263	2.6241	0.1188	0.0255	0.0037	0.0064
chr2:107133753-107134090	MLT1	tagging	partial	TCONS_00057386	lincRNA	0.0878	0.0412	0.0351	0.0389	0.0223	0	0
chr6:111586545-111586612	MLT1	tagging	partial	TCONS_00088311	lincRNA	0.4955	0.6019	0.5742	0.0837	0.0144	0	0
chr5:25756081-25756309	MLT1	tagging	partial	TCONS_00080507	lincRNA	0.0737	0.0692	0.0197	0	0	0	0
chr5:25756029-25756048	MLT1	tagging	partial	TCONS_00080507	lincRNA	0.0737	0.0692	0.0197	0	0	0	0
chr1:195127874-195128308	MLT1	tagging	partial	Cr1l	protein_coding	0.3162	0.3235	0.1943	0.0113	0.0195	0.0512	0.1022
chr12:24466396-24466507	MLT1	tagging	partial	TCONS_00021741	lincRNA	0.0303	0.0379	0.097	0	0	0	0
chr8:70883208-70883426	MLT1	tagging	partial	Slc5a5	protein_coding	0.0887	0.0739	0.1578	0.2097	0.2103	0	0
chr15:66877429-66877736	MLT1	tagging	partial	TCONS_00039356	lincRNA	0.2229	0.262	0.2236	0.0316	0.0045	0	0
chr18:80222641-80223012	MLT1	tagging	partial	Gm16286	protein_coding	1.5078	2.2096	1.1569	0.7799	2.2272	0.924	0.7177
chr3:151211589-151211932	MLT1	tagging	partial	TCONS_00066143	lincRNA	0.0253	0.4339	0.5093	0.0214	0.0037	0	0
chrX:74451734-74451826	MLT1	tagging	partial	Ikbkg	protein_coding	0.017	0.0142	0.0242	0.0602	0.4087	0.1867	0.2415
chr13:41751502-41751679	MLT1	tagging	partial	TCONS_00026800	lincRNA	0.377	0.3094	0.3459	0.2089	0.012	0	0
chr9:26974665-26974800	MLT1	tagging	partial	Acad8	protein_coding	0.0196	0	0	0.1857	0.2594	0.3325	0.2542
chr14:76366187-76366279	MLT1	tagging	partial	TCONS_00035586	lincRNA	0.0901	0.0433	0.0592	0.0246	0	0	0
chr11:120674449-120674703	MLT1	tagging	partial	Aspscr1	protein_coding	1.0844	1.2122	0.3858	0.2719	0.4008	0.2343	0.2878
chr18:15270793-15270937	MLT1	tagging	partial	TCONS_00051233	lincRNA	0.0793	0.2434	0.1847	0.017	0	0	0
chr13:77668181-77668515	MLT1	tagging	partial	TCONS_00030687	protein_coding	0.0394	0.0411	0.014	0.0078	0	0	0
chr8:43294232-43294355	MLT1	tagging	partial	Zfp42	protein_coding	0.0509	0.0796	0.0543	1.3688	0.7889	2.563	2.4516
chr19:26471592-26471720	MLT1	tagging	partial	TCONS_00054722	lincRNA	0.2921	0.3874	0.5007	0.0837	0.009	0	0
chr4:43502611-43502795	MLT1	tagging	partial	TCONS_00073459	lincRNA	0.0343	0.0601	0.0513	0.0406	0.0209	0.0122	0
chr14:22632808-22633061	MLT1	tagging	partial	TCONS_00031799	lincRNA	0.0298	0.016	0.0045	0	0	0	0
chr9:113610295-113610440	MLT1	tagging	partial	TCONS_00107494	lincRNA	0.1001	0.153	0.1425	0.0263	0.0226	0	0
chr3:94332207-94332397	MLT1	tagging	partial	Them4	protein_coding	0.7335	0.4387	0.4085	1.018	0.3566	0.398	0.2429
chr1:38793481-38793645	MLT1	tagging	partial	Lonrf2	protein_coding	0.3497	0.2943	0.481	0.2306	0.041	0.006	0
chr13:96919518-96919642	MLT1	tagging	partial	TCONS_00028086	lincRNA	0.0848	0.1724	0.1245	0	0	0	0
chr5:24161886-24162000	MLT1	tagging	partial	Klhl7	protein_coding	0	0.0597	0.0102	0.3501	0.1554	0.2214	0.1528
chr5:42980577-42980833	MLT1	tagging	partial	TCONS_00077293	lincRNA	0.0162	0.099	0.1019	0.0024	0	0	0
chrX:74295039-74295164	MLT1	tagging	partial	Taz	protein_coding	0.9915	0.9119	0.4536	0.1116	0.2773	0.0935	0.1398
chr7:80673954-80674209	MLT1	tagging	partial	Crtc3	protein_coding	0.0918	0.0191	0.0408	0.0362	0.0078	0.0273	0.0233
chrX:74450017-74450305	MLT1	tagging	partial	Ikbkg	protein_coding	0.017	0.0142	0.0242	0.0602	0.4087	0.1867	0.2415
chr1:80064799-80064878	MLT1	tagging	partial	TCONS_00005661	lincRNA	0.5758	0.6372	0.5167	0.1566	0.0155	0	0
chr5:24161395-24161595	MLT1	tagging	partial	Klhl7	protein_coding	0	0.0597	0.0102	0.3501	0.1554	0.2214	0.1528
chr2:30829687-30829904	MLT1	tagging	partial	Asb6	protein_coding	0	0.0177	0	0.7014	0.56	0.0755	0.0645
chr5:38191126-38191350	MLT1	tagging	partial	Zbtb49	protein_coding	0.372	0.1495	0.2411	0.0314	0	0	0
chr11:18428172-18428465	MLT1	tagging	partial	TCONS_00017915	lincRNA	0.0337	0.0169	0.0216	0.0159	0	0	0
chrX:66507581-66508003	MLT1	tagging	partial	TCONS_00111831	lincRNA	0.0043	0.0053	0.0136	0.0101	0	0.0038	0.0032
chr5:25755583-25755732	MLT1	tagging	partial	TCONS_00080507	lincRNA	0.0737	0.0692	0.0197	0	0	0	0
chr1:133291853-133292105	MLT1	tagging	partial	Plekha6	protein_coding	1.611	1.7083	1.3895	0.5942	0.131	0.0919	0.0982
chr8:79538085-79538287	MLT1	tagging	partial	TCONS_00100736	lincRNA	0.0157	0.0393	0.0419	0	0	0	0
chr3:32522290-32522364	MLT1	tagging	partial	Zfp639	protein_coding	0.5525	0.4825	0.2809	1.8145	0.6686	0.1642	0.1135
chr16:17283682-17283754	MLT1	tagging	partial	Pi4ka	protein_coding	1.6618	1.5948	0.4538	0.2285	0.3536	0.1033	0.4415
chr8:87187191-87187610	MLT1	tagging	partial	TCONS_00100918	lincRNA	0.4773	0.4939	0.4216	0.0454	0	0	0
chr16:92346745-92346870	MLT1	tagging	partial	Kcne1	protein_coding	0	0	0.0456	0.0505	0.0759	0	0
chr15:63929801-63929985	MLT1	tagging	partial	Fam49b	protein_coding	0.0124	0	0.0264	0.0877	0.0377	0.1542	0.273
chr1:133292179-133292259	MLT1	tagging	partial	Plekha6	protein_coding	1.611	1.7083	1.3895	0.5942	0.131	0.0919	0.0982
chr2:73283702-73283799	MLT1	tagging	partial	Cir1	protein_coding	1.6532	1.4058	1.5883	0.215	0.2689	0.2063	0.2896
chr15:60294293-60294849	MLT1	tagging	partial	TCONS_00039173	lincRNA	0.0666	0.111	0.1137	0.0184	0.0023	0	0
chr16:41970803-41970944	MLT1	tagging	partial	TCONS_00043537	protein_coding	0.0938	0.1119	0.0893	0.0051	0	0	0
chr1:47259070-47259191	MLT1	tagging	partial	TCONS_00004902	lincRNA	0	0.0227	0.0582	0	0	0	0
chr7:12930594-12930716	MLT1	tagging	partial	Rnf225	protein_coding	0	0	0.0748	1.0299	0.3664	0.0179	0.0305
chr5:24135700-24135744	MLT1	tagging	partial	Klhl7	protein_coding	0.0614	0	0.1638	1.125	0.156	0.2462	0.1403
chr6:86307444-86307674	MLT1	tagging	partial	TCONS_00087818	lincRNA	0.1173	0.1004	0.1648	0.0073	0.0063	0	0.0047
chr5:113691941-113692205	MLT1	tagging	partial	TCONS_00082374	protein_coding	0.0254	0.0529	0.0542	0.2903	0.0516	0.0226	0.0064
chr17:23698049-23698276	MLT1	tagging	partial	TCONS_00047386	protein_coding	0.1154	0.0721	0.0352	0.4483	0.1676	0.0147	0.0063
chr4:116133243-116133299	MLT1	tagging	partial	Lurap1	protein_coding	0.1176	0.1103	0.0565	0.0348	0.0418	0.0367	0.0537
chr10:63855893-63856124	MLT1	tagging	partial	Ctnna3	protein_coding	0.2151	0.1722	0.1837	0.0305	0	0	0
chr10:111882184-111882286	MLT1	tagging	partial	TCONS_00010463	lincRNA	0.0113	0	0.0091	0.0033	0	0	0
chr7:12930364-12930488	MLT1	tagging	partial	Rnf225	protein_coding	0	0	0.0748	1.0299	0.3664	0.0179	0.0305
chr6:145456151-145456316	MLT1	tagging	partial	TCONS_00086292	lincRNA	0.04	0.0438	0.0374	0.0237	0	0	0.0038
chr7:48921602-48921722	MLT1	tagging	partial	TCONS_00090599	lincRNA	0.1924	0.2631	0.2356	0.0273	0	0.0023	0.002
chr5:7182010-7182191	MLT1	tagging	partial	TCONS_00076363	protein_coding	6.3309	13.5972	6.6818	1.6175	1.318	0.4304	0.3746
chr5:136915438-136915536	MLT1	tagging	partial	Ift22	protein_coding	1.5352	1.4296	1.139	0.103	0.0111	0.0194	0.0415
chr18:69755892-69756016	MLT1	tagging	partial	TCONS_00052191	lincRNA	0.2757	0.4138	0.2747	0.0109	0	0	0
chr16:41972756-41973231	MLT1	tagging	partial	TCONS_00043537	protein_coding	0.0938	0.1119	0.0893	0.0051	0	0	0
chr2:142331255-142331648	MLT1	tagging	partial	TCONS_00062161	lincRNA	0.0108	0.0944	0.0691	0.0255	0	0	0
chr11:62694058-62694117	MLT1	tagging	partial	TCONS_00015620	lincRNA	0	0	0.0253	0.028	0	0.0211	0
chr4:70217256-70217368	MLT1	tagging	partial	Cdk5rap2	protein_coding	0.1989	0.1531	0.0871	0	0.0156	0.0227	0.035
chr12:9491559-9491754	MLT1	tagging	partial	TCONS_00023736	lincRNA	0.1123	0.1229	0.1573	0.1493	0.0428	0	0.016
chr5:7182246-7182440	MLT1	tagging	partial	TCONS_00076363	protein_coding	6.3309	13.5972	6.6818	1.6175	1.318	0.4304	0.3746
chr11:54863286-54863459	MLT1	tagging	partial	Hint1	protein_coding	2.2874	2.6718	2.6296	0.3863	0.0256	0	0
chr12:111454270-111454507	MLT1	tagging	partial	Tnfaip2	protein_coding	0	0	0.0813	0	0	0	0
chr7:125298214-125298370	MLT1	tagging	partial	lncRNA-OET-07-243	lincRNA	0.094	0.0784	0.1003	1.3704	0.0955	0.0558	0.0716
chr10:63856142-63856224	MLT1	tagging	partial	Ctnna3	protein_coding	0.2151	0.1722	0.1837	0.0305	0	0	0
chr7:98192472-98192549	MLT1	tagging	partial	B3gnt6	protein_coding	0.0137	0	0.0146	0.0162	0	0.0731	0.302
chr11:115116383-115116419	MLT1	tagging	partial	Cd300lf	protein_coding	2.8618	2.3006	2.073	0.2014	0	0	0
chr10:53501223-53501438	MLT1	tagging	partial	TCONS_00012190	lincRNA	0.1019	0.1529	0.1197	0.0121	0	0	0
chr9:123172056-123172173	MLT1	tagging	partial	Cdcp1	protein_coding	0.0412	0.0257	0.011	0.0608	0.0941	0.055	0.2586
chr9:60951652-60951862	MLT1	tagging	partial	TCONS_00103223	lincRNA	1.0757	1.2344	1.4753	0.2535	0.0277	0	0.0052
chr6:39817377-39817791	MLT1	tagging	partial	TCONS_00084319	lincRNA	2.9149	3.0764	3.2669	1.4946	0.0878	0.0122	0
chr9:96525582-96525810	MLT1	tagging	partial	Gm28729	lincRNA	0.0702	0.0399	0.0613	0.1735	0.0389	0	0
chr12:86575590-86575778	MLT1	tagging	partial	TCONS_00022876	lincRNA	0.0408	0.0468	0.0327	0	0	0.003	0
chr13:63462120-63462295	MLT1	tagging	partial	TCONS_00030223	lincRNA	0.01	0.0251	0.0322	0.0059	0.0102	0.0045	0
chr9:123171846-123171985	MLT1	tagging	partial	Cdcp1	protein_coding	0.0412	0.0257	0.011	0.0608	0.0941	0.055	0.2586
chrX:9663556-9663674	MLT1	tagging	partial	Dynlt3	protein_coding	0.0859	0.1968	0.1375	0.203	0.0145	0.0128	0.0545
chr12:86576175-86576282	MLT1	tagging	partial	TCONS_00022876	lincRNA	0.0408	0.0468	0.0327	0	0	0.003	0
chr8:106434424-106434511	MLT1	tagging	partial	TCONS_00101297	lincRNA	0.0125	0.0039	0.0266	0.0111	0	0.0056	0.0048
chr9:13595553-13595720	MLT1	tagging	partial	TCONS_00105047	lincRNA	0.0546	0.0598	0.0802	0.0081	0	0	0
chr8:60928706-60928986	MLT1	tagging	partial	Clcn3	protein_coding	0.5952	0.7282	0.5802	0.2601	0.1842	0.4498	0.5322
chr7:98192785-98193078	MLT1	tagging	partial	B3gnt6	protein_coding	0.0137	0	0.0146	0.0162	0	0.0731	0.302
chr8:114340692-114341083	MLT1	tagging	partial	TCONS_00101546	lincRNA	0.7891	0.8928	0.9226	0.311	0.4584	0.1675	0.1431
chrX:42365136-42365555	MLT1	tagging	partial	TCONS_00108840	lincRNA	0.0081	0.0102	0	0.0578	0.0083	0	0
chr4:34937832-34938141	MLT1	tagging	partial	TCONS_00069840	lincRNA	0.0463	0.301	0.3756	0.0219	0.0282	0	0
chr10:124923085-124923317	MLT1	tagging	partial	TCONS_00010854	lincRNA	0.0292	0.0487	0.065	0.0173	0	0	0
chr7:101887507-101887882	MLT1	tagging	partial	TCONS_00091530	lincRNA	0.1505	0.327	0.2368	0.2061	0.2094	0.0989	0.0483
chr17:56071487-56071565	MLT1	tagging	partial	Ubxn6	protein_coding	3.0265	2.1828	1.3942	0.8017	0.5872	0.3694	0.3921
chr8:106433963-106434295	MLT1	tagging	partial	TCONS_00101297	lincRNA	0.0125	0.0039	0.0266	0.0111	0	0.0056	0.0048
chr9:16016812-16016995	MLT1	tagging	partial	Fat3	protein_coding	0.0875	0.0365	0.0778	0	0	0	0
chrX:71297895-71297972	MLT1	tagging	partial	Mtm1	protein_coding	0.0355	0.0148	0.0253	0.028	0.0361	0.0422	0.1532
chr14:79250806-79250917	MLT1	tagging	partial	TCONS_00033324	lincRNA	0.095	0.1005	0.0546	0	0.0074	0	0
chr15:84757861-84758056	MLT1	tagging	partial	Arhgap8	protein_coding	0.0679	0.0424	0.1268	0.923	0.138	0.2118	0.4782
chr18:84763189-84763276	MLT1	tagging	partial	TCONS_00052511	lincRNA	0.1104	0.0894	0.0902	0.0384	0	0	0
chr4:70217714-70218041	MLT1	tagging	partial	Cdk5rap2	protein_coding	0.1989	0.1531	0.0871	0	0.0156	0.0227	0.035
chr1:93369516-93369659	MLT1	tagging	partial	Ppp1r7	protein_coding	1.377	1.2995	1.2995	0.5046	0.3622	0.3143	0.3618
chr7:101888069-101888081	MLT1	tagging	partial	TCONS_00091530	lincRNA	0.1505	0.327	0.2368	0.2061	0.2094	0.0989	0.0483
chr2:51416875-51416902	MLT1	tagging	partial	1700057H21Rik	lincRNA	0.0346	0.024	0.0328	0.0091	0	0	0
chr2:34939140-34939258	MLT1	tagging	partial	TCONS_00056255	lincRNA	0.0106	0.0132	0.0958	0.3246	0.0751	0.0941	0.1086
chr10:63855713-63855754	MLT1	tagging	partial	Ctnna3	protein_coding	0.2151	0.1722	0.1837	0.0305	0	0	0
chr16:73279084-73279525	MLT1	tagging	partial	TCONS_00042130	lincRNA	0	0	0.0246	0	0.0078	0	0
chr13:62862642-62862845	MLT1	tagging	partial	TCONS_00027479	lincRNA	0.1995	0.294	0.1293	0.0421	0.0652	0.0571	0.0705
chr18:35263037-35263220	MLT1	tagging	partial	Sil1	protein_coding	0.6738	0.5765	0.3123	0.0157	0.0946	0.0474	0.0743
chr16:3856324-3856475	MLT1	tagging	partial	Zfp174	protein_coding	0.6904	0.6326	0.3648	0.2667	0.0069	0.0122	0.0208
chr17:75392117-75392480	MLT1	tagging	partial	Ltbp1	protein_coding	0	0	0.0159	0	0	0	0
chr14:121507167-121507345	MLT1	tagging	partial	TCONS_00036059	lincRNA	1.0765	1.3187	0.9381	0.1818	0.0447	0	0
chr16:3856132-3856332	MLT1	tagging	partial	Zfp174	protein_coding	0.6904	0.6326	0.3648	0.2667	0.0069	0.0122	0.0208
chr16:30852099-30852237	MLT1	tagging	partial	TCONS_00041458	lincRNA	0.6006	0.6426	0.6213	0.1318	0.0252	0	0
chr4:99571402-99571855	MLT1	tagging	partial	TCONS_00074377	lincRNA	0.0265	0.0331	0.0057	0	0	0	0.0081
chr13:63459527-63459891	MLT1	tagging	partial	TCONS_00030223	lincRNA	0.01	0.0251	0.0322	0.0059	0.0102	0.0045	0
chr2:51417103-51417410	MLT1	tagging	partial	1700057H21Rik	lincRNA	0.0346	0.024	0.0328	0.0091	0	0	0
chr16:92319085-92319280	MLT1	tagging	partial	4930563D23Rik	protein_coding	0	0.0149	0.0254	0.0141	0	0	0
chr15:75899915-75900010	MLT1	tagging	partial	Eef1d	protein_coding	3.6164	2.2236	1.0004	0.4687	1.1236	1.7456	0.7229
chr8:36033318-36033506	MLT1	tagging	partial	lncRNA-OET-08-366	lincRNA	0.6368	0.637	0.4985	0	0.0432	0	0
chr10:53501034-53501190	MLT1	tagging	partial	TCONS_00012190	lincRNA	0.1019	0.1529	0.1197	0.0121	0	0	0
chr13:62861975-62862093	MLT1	tagging	partial	TCONS_00027479	lincRNA	0.1995	0.294	0.1293	0.0421	0.0652	0.0571	0.0705
chr7:120128212-120128450	MLT1	tagging	partial	Zp2	protein_coding	6.4429	3.7431	0.7082	0.2133	0.0432	0	0.0121
chr18:42071939-42072396	MLT1	tagging	partial	TCONS_00051678	lincRNA	0.0768	0.072	0.1024	0.0227	0	0	0
chr1:91247413-91247607	MLT1	tagging	partial	Ube2f	protein_coding	0.3452	0.2924	0.1783	0.1185	0.0566	0.0099	0.0254
chr1:105868131-105868576	MLT1	tagging	partial	TCONS_00006128	lincRNA	0.0749	0.0826	0.1222	0.0104	0.0045	0	0
chr4:140753331-140753427	MLT1	tagging	partial	TCONS_00071945	protein_coding	0.4308	0.3046	0.1713	0.0738	0.0242	0.0053	0
chr10:18252687-18252769	MLT1	tagging	partial	TCONS_00008325	lincRNA	0	0.0307	0.0262	0.0097	0	0	0.0062
chr2:179167053-179167114	MLT1	tagging	partial	TCONS_00063282	lincRNA	0.0866	0.1083	0.104	0.0384	0.066	0.0096	0
chr12:105605387-105605783	MLT1	tagging	partial	Bdkrb1	protein_coding	2.0518	2.0885	1.7573	0.1128	0	0	0.0363
chr11:31327768-31327894	MLT1	tagging	partial	TCONS_00018284	lincRNA	0.0562	0.0703	0.03	0	0	0	0
chr7:127192224-127192296	MLT1	tagging	partial	Cd2bp2	protein_coding	5.0862	5.0213	3.697	2.5121	2.0239	0.8053	0.8537
chr7:12807408-12807518	MLT1	tagging	partial	TCONS_00092907	protein_coding	0.1949	0.2119	0.3226	0.1336	0.0919	0.141	0.1054
chr18:25136540-25136685	MLT1	tagging	partial	Tpgs2	protein_coding	8.117	7.4744	5.8753	1.3257	0.115	0.0458	0.0235
chr5:119194917-119194962	MLT1	tagging	partial	TCONS_00082573	lincRNA	0.2863	0.179	0.3566	0.1128	0	0	0
chr13:70151082-70151209	MLT1	tagging	partial	TCONS_00030538	lincRNA	0.2313	0.2425	0.2796	0.0362	0	0.003	0
chr8:35763168-35763501	MLT1	tagging	partial	TCONS_00100030	lincRNA	0.2355	0.2335	0.26	0.0336	0.0041	0.0036	0.0124
chr10:18253592-18253662	MLT1	tagging	partial	TCONS_00008325	lincRNA	0	0.0307	0.0262	0.0097	0	0	0.0062
chr1:162532626-162532786	MLT1	tagging	partial	Mettl13	protein_coding	0.037	0.0154	0.0132	0.7003	0.4767	0.253	0.1222
chr10:66542197-66542388	MLT1	tagging	partial	TCONS_00012490	lincRNA	0.0104	0.0049	0.0166	0	0.0013	0	0
chr16:30851233-30851348	MLT1	tagging	partial	TCONS_00041458	lincRNA	0.6006	0.6426	0.6213	0.1318	0.0252	0	0
chr6:88544295-88544603	MLT1	tagging	partial	TCONS_00085282	lincRNA	4.0573	4.2029	4.7528	0.9894	0.0885	0	0
chr7:101888381-101888499	MLT1	tagging	partial	TCONS_00091530	lincRNA	0.1505	0.327	0.2368	0.2061	0.2094	0.0989	0.0483
chr7:120127109-120127237	MLT1	tagging	partial	Zp2	protein_coding	6.4429	3.7431	0.7082	0.2133	0.0432	0	0.0121
chr5:119195198-119195486	MLT1	tagging	partial	TCONS_00082573	lincRNA	0.2863	0.179	0.3566	0.1128	0	0	0
chr15:75898590-75898798	MLT1	tagging	partial	Eef1d	protein_coding	3.6164	2.2236	1.0004	0.4687	1.1236	1.7456	0.7229
chr8:11572944-11573081	MLT1	tagging	partial	TCONS_00099212	lincRNA	0.0319	0.01	0.0255	0.2734	0.0973	0.0142	0.0061
chr17:25444872-25445082	MLT1	tagging	partial	TCONS_00047494	lincRNA	0.2055	0.3971	0.2193	0.0442	0	0	0
chr18:25136378-25136519	MLT1	tagging	partial	Tpgs2	protein_coding	8.117	7.4744	5.8753	1.3257	0.115	0.0458	0.0235
chr7:127191991-127192145	MLT1	tagging	partial	Cd2bp2	protein_coding	5.0862	5.0213	3.697	2.5121	2.0239	0.8053	0.8537
chr7:28798110-28798279	MLT1	tagging	partial	Rinl	protein_coding	0	0	0	2.6163	3.6556	0.9863	1.4537
chr10:66541229-66541290	MLT1	tagging	partial	TCONS_00012490	lincRNA	0.0104	0.0049	0.0166	0	0.0013	0	0
chr5:143932563-143932748	MLT1	tagging	partial	Pms2	protein_coding	0.2919	0.4596	0.2423	0.6518	0.1868	0.0771	0.1564
chr16:30851678-30851748	MLT1	tagging	partial	TCONS_00041458	lincRNA	0.6006	0.6426	0.6213	0.1318	0.0252	0	0
chr8:90769795-90769967	MLT1	tagging	partial	TCONS_00097878	lincRNA	0.0699	0.035	0.0597	0.0165	0	0	0
chrX:130464812-130465264	MLT1	tagging	partial	Diap2	protein_coding	0	0.0161	0.0137	0	0.0131	0.0974	0.0931
chr16:30851528-30851547	MLT1	tagging	partial	TCONS_00041458	lincRNA	0.6006	0.6426	0.6213	0.1318	0.0252	0	0
chr10:95211754-95212209	MLT1	tagging	partial	TCONS_00013239	lincRNA	0.0289	0.0433	0.0616	0.0068	0.0059	0.0103	0.0088
chrX:130463611-130463791	MLT1	tagging	partial	Diap2	protein_coding	0	0.0161	0.0137	0	0.0131	0.0974	0.0931
chr15:79053278-79053431	MLT1	tagging	partial	Ankrd54	protein_coding	2.8669	2.8197	0.9284	5.2936	1.7355	0.3158	0.2944
chr11:21421409-21421545	MLT1	tagging	partial	TCONS_00018033	lincRNA	0.5334	0.7337	0.7402	0.0631	0	0	0
chr5:49877236-49877296	MLT1	tagging	partial	TCONS_00081149	lincRNA	0.0706	0.0883	0.3016	0.0835	0	0	0
chr16:9202320-9202393	MLT1	tagging	partial	TCONS_00040905	lincRNA	1.0553	2.3094	1.1265	0	0	0	0
chr13:70207511-70207670	MLT1	tagging	partial	TCONS_00027717	lincRNA	0.0664	0.0664	0.0851	0	0	0	0
chr7:28798789-28798926	MLT1	tagging	partial	Rinl	protein_coding	0	0	0	2.6163	3.6556	0.9863	1.4537
chr11:115116505-115116655	MLT1	tagging	partial	Cd300lf	protein_coding	2.8618	2.3006	2.073	0.2014	0	0	0
chr12:55507582-55507818	MLT1	tagging	partial	TCONS_00024706	lincRNA	0.1361	0.2127	0.1997	0.0704	0	0.0227	0.0065
chr9:122839747-122839832	MLT1	tagging	partial	Tcaim	protein_coding	1.2732	1.5139	1.03	1.1513	0.3179	0.0597	0.0442
chrX:130463401-130463519	MLT1	tagging	partial	Diap2	protein_coding	0	0.0161	0.0137	0	0.0131	0.0974	0.0931
chr7:127192399-127192507	MLT1	tagging	partial	Cd2bp2	protein_coding	5.0862	5.0213	3.697	2.5121	2.0239	0.8053	0.8537
chr2:124088025-124088227	MLT1	tagging	partial	TCONS_00061818	lincRNA	0.0262	0	0.028	0	0	0	0
chr7:118843313-118843516	MLT1	tagging	partial	Knop1	protein_coding	0.272	0.3504	0.3519	1.5494	2.2203	1.0432	0.9981
chr5:134144482-134144574	MLT1	tagging	partial	Gatsl2	protein_coding	0.1817	0.1641	0.1401	0.0835	0.0513	0.009	0.0077
chr5:30148264-30148540	MLT1	tagging	partial	Hadha	protein_coding	0.8954	1.1684	1.1636	0.1841	0.1847	0.2198	0.4744
chr13:101582635-101582750	MLT1	tagging	partial	TCONS_00031101	lincRNA	0.0962	0.2313	0.2764	0.035	0	0	0
chr19:3692810-3692970	MLT1	tagging	partial	TCONS_00052561	lincRNA	0.0149	0.0561	0.0638	0.0707	0	0	0
chr7:83624492-83624651	MLT1	tagging	partial	Tmc3	protein_coding	0.1935	0.3629	0.243	0.0135	0.0058	0	0.0087
chrX:105848805-105848883	MLT1	tagging	partial	Atrx	protein_coding	1.7046	1.3966	1.0039	0.4934	0.2868	0.3143	0.3447
chr8:94821919-94822212	MLT1	tagging	partial	Ciapin1	protein_coding	4.181	3.8506	3.85	0.5344	0.469	0.4365	0.4016
chr13:96715677-96715888	MLT1	tagging	partial	TCONS_00028069	lincRNA	0.0998	0.0304	0.0286	0.0144	0.0025	0.0022	0.0056
chrX:105848974-105849280	MLT1	tagging	partial	Atrx	protein_coding	1.7046	1.3966	1.0039	0.4934	0.2868	0.3143	0.3447
chr10:119419541-119419656	MLT1	tagging	partial	TCONS_00013864	lincRNA	1.4026	1.6874	1.194	0.3149	0.0541	0.0633	0
chrX:36667235-36667358	MLT1	tagging	partial	TCONS_00111414	lincRNA	0.0865	0.0811	0.0462	0	0.022	0.0193	0
chr7:83624776-83624940	MLT1	tagging	partial	Tmc3	protein_coding	0.1935	0.3629	0.243	0.0135	0.0058	0	0.0087
chr14:53726408-53726585	MLT1	tagging	partial	TCONS_00035018	lincRNA	0.202	0.2527	0.3697	0	0	0	0
chr6:79011108-79011245	MLT1	tagging	partial	TCONS_00087686	lincRNA	0.0279	0.0044	0.0037	0	0	0	0
chr13:96714884-96715187	MLT1	tagging	partial	TCONS_00028069	lincRNA	0.0998	0.0304	0.0286	0.0144	0.0025	0.0022	0.0056
chr7:122194690-122194709	MLT1	tagging	partial	TCONS_00092020	lincRNA	0.6836	1.1597	0.7805	0.1898	0.0302	0	0
chr13:70207322-70207480	MLT1	tagging	partial	TCONS_00027717	lincRNA	0.0664	0.0664	0.0851	0	0	0	0
chr8:94821630-94821712	MLT1	tagging	partial	Ciapin1	protein_coding	4.181	3.8506	3.85	0.5344	0.469	0.4365	0.4016
chr8:9143126-9143374	MLT1	tagging	partial	TCONS_00096118	lincRNA	0.0962	0.0656	0.028	0	0	0	0
chr3:66054870-66055071	MLT1	tagging	partial	Veph1	protein_coding	0.0759	0.1266	0.0991	0	0	0	0
chr5:86415876-86415964	MLT1	tagging	partial	Tmprss11a	protein_coding	0.0209	0.0653	0	0	0	0	0
chr5:21481271-21481559	MLT1	tagging	partial	Fam185a	protein_coding	1.6558	1.3136	1.2164	0.6525	0.0724	0.2222	0.0678
chr1:188593601-188593740	MLT1	tagging	partial	lncRNA-OET-01-320	lincRNA	0.0023	0	0.0321	0.0685	0.0047	0.0062	0.0071
chr4:133633980-133634197	MLT1	tagging	partial	Zdhhc18	protein_coding	3.5993	1.835	1.0344	0.6547	0.1689	0.074	0.1054
chr3:66055228-66055373	MLT1	tagging	partial	Veph1	protein_coding	0.0759	0.1266	0.0991	0	0	0	0
chr4:127908926-127909231	MLT1	tagging	partial	TCONS_00075104	lincRNA	4.4151	4.7922	6.3017	2.4926	0.3026	0	0
chr2:167503205-167503281	MLT1	tagging	partial	Rnf114	protein_coding	31.5492	25.4457	17.8024	2.5749	0.3163	0.7765	0.6635
chr8:23519895-23520263	MLT1	tagging	partial	TCONS_00099567	lincRNA	0.0287	0.0179	0.0612	0.0169	0	0	0
chr1:95266997-95267073	MLT1	tagging	partial	TCONS_00006002	lincRNA	0.0151	0	0	0.1783	0.0153	0	0
chr7:67591295-67591438	MLT1	tagging	partial	Lrrc28	protein_coding	1.1279	1.163	1.0192	0.1579	0.005	0.0353	0.0264
chr1:63126198-63126300	MLT1	tagging	partial	Gm20342	lincRNA	0	0	0.0105	0.0971	0.3172	0.1756	0.2901
chr12:111013646-111013772	MLT1	tagging	partial	TCONS_00023417	lincRNA	0.2827	0.0643	0.1097	0.0304	0.0261	0	0.0392
chr3:69070527-69070982	MLT1	tagging	partial	Kpna4	protein_coding	0.0136	0.0057	0.0339	0.2091	0.5763	0.7155	0.5285
chr8:33497654-33497706	MLT1	tagging	partial	TCONS_00096796	lincRNA	0.2351	0.1633	0.0837	0.0309	0	0	0
chr3:69755327-69755473	MLT1	tagging	partial	Nmd3	protein_coding	0.3191	0.4043	0.2421	0.2532	0.2519	0.1684	0.0863
chr12:54670498-54670587	MLT1	tagging	partial	Eapp	protein_coding	0.7547	1.1711	0.5047	0.2687	0.4252	0.47	0.2493
chr9:29559155-29559311	MLT1	tagging	partial	TCONS_00102530	lincRNA	0.4699	0.6072	0.4515	0.0741	0	0	0
chr8:113896372-113896616	MLT1	tagging	partial	TCONS_00101534	lincRNA	0.5308	0.8155	0.6475	0.0717	0	0	0
chr8:13115886-13116167	MLT1	tagging	partial	Cul4a	protein_coding	0.4994	0.2082	0.1579	0.0656	0.3572	0.2143	0.1972
chrX:98552474-98552558	MLT1	tagging	partial	Ophn1	protein_coding	0.742	0.7332	0.6869	0.227	0.0053	0	0
chr15:37696607-37696900	MLT1	tagging	partial	TCONS_00036677	lincRNA	0.026	0.0325	0.0208	0	0	0	0.005
chr8:127586855-127587057	MLT1	tagging	partial	TCONS_00101941	lincRNA	0.0038	0.0048	0	0.0045	0.0039	0.0203	0.0406
chr8:33497707-33497875	MLT1	tagging	partial	TCONS_00096796	lincRNA	0.2351	0.1633	0.0837	0.0309	0	0	0
chr8:33497087-33497307	MLT1	tagging	partial	TCONS_00096796	lincRNA	0.2351	0.1633	0.0837	0.0309	0	0	0
chr8:113896615-113896829	MLT1	tagging	partial	TCONS_00101534	lincRNA	0.5308	0.8155	0.6475	0.0717	0	0	0
chr15:67075438-67075721	MLT1	tagging	partial	TCONS_00037114	lincRNA	0.4671	0.5026	0.6261	0.0128	0.011	0	0.0165
chr19:29144555-29144867	MLT1	tagging	partial	Rcl1	protein_coding	1.6807	1.4011	0.8638	2.0974	2.4256	1.4056	0.64
chr11:60557198-60557260	MLT1	tagging	partial	Alkbh5	protein_coding	32.6317	28.3085	20.4207	4.0238	0.7815	1.0112	1.063
chr14:46066138-46066182	MLT1	tagging	partial	TCONS_00032521	lincRNA	0.0767	0.1598	0.1091	0.0302	0	0	0
chr14:46065887-46066110	MLT1	tagging	partial	TCONS_00032521	lincRNA	0.0767	0.1598	0.1091	0.0302	0	0	0
chr15:88674820-88674962	MLT1	tagging	partial	TCONS_00039970	lincRNA	0.0515	0.0644	0.1099	0.1217	0	0	0
chr7:105409726-105410173	MLT1	tagging	partial	Cnga4	protein_coding	0.2478	0.3099	0.127	0.0586	0.0202	0	0.0076
chr1:65545049-65545220	MLT1	tagging	partial	TCONS_00001308	protein_coding	0.096	0.057	0.0365	0.0231	0.0149	0.0029	0.0025
chr11:7172209-7172570	MLT1	tagging	partial	Adcy1	protein_coding	0.3896	0.18	0.1162	0.0291	0	0.0063	0.0053
chr11:4142130-4142363	MLT1	tagging	partial	Ccdc157	protein_coding	0.5107	0.3122	0.1696	1.0867	0.1384	0.0101	0.0519
chr11:40356631-40356746	MLT1	tagging	partial	TCONS_00018416	lincRNA	0.2845	0.3294	0.39	0.0789	0.0071	0	0
chr12:117390178-117390249	MLT1	tagging	partial	TCONS_00025874	lincRNA	0.0332	0.2492	0.3191	0.0393	0	0	0
chr1:65545389-65545510	MLT1	tagging	partial	TCONS_00001308	protein_coding	0.096	0.057	0.0365	0.0231	0.0149	0.0029	0.0025
chr13:118576296-118576479	MLT1	tagging	partial	TCONS_00031420	lincRNA	0.0228	0.0143	0	0.0135	0	0	0
chr11:40356421-40356595	MLT1	tagging	partial	TCONS_00018416	lincRNA	0.2845	0.3294	0.39	0.0789	0.0071	0	0
chr3:39898444-39898516	MLT1	tagging	partial	TCONS_00066982	lincRNA	0.0051	0.0127	0.0378	0.0359	0.0051	0	0
chr1:121910975-121911104	MLT1	tagging	partial	TCONS_00002504	lincRNA	0.1972	0.4814	0.461	0.0777	0.0095	0	0
chr8:126352164-126352678	MLT1	tagging	partial	Slc35f3	protein_coding	0.3242	0.1843	0.0629	0.0697	0.03	0	0
chr2:117860245-117860375	MLT1	tagging	partial	TCONS_00057547	lincRNA	0.8398	1.6036	1.272	0.161	0.0231	0.0101	0
chr18:58679679-58679880	MLT1	tagging	partial	Isoc1	protein_coding	0.5271	0.3066	0.4449	0.3189	0.3739	1.0599	2.0634
chr13:81779357-81779455	MLT1	tagging	partial	Gm17259	lincRNA	0.1472	0.2104	0.1272	0.0663	0.0356	0.0875	0.0641
chr2:152012821-152012975	MLT1	tagging	partial	TCONS_00062355	lincRNA	0.3115	0.269	0.285	0.114	0.0226	0.0066	0.0056
chr13:63814389-63814520	MLT1	tagging	partial	TCONS_00030236	lincRNA	0	0.0638	0	0.0905	0	0.0455	0.0194
chr18:58680005-58680106	MLT1	tagging	partial	Isoc1	protein_coding	0.5271	0.3066	0.4449	0.3189	0.3739	1.0599	2.0634
chr7:121585081-121585484	MLT1	tagging	partial	TCONS_00095332	lincRNA	0.1694	0.2082	0.1563	0.0271	0	0	0
chr13:81779699-81779946	MLT1	tagging	partial	Gm17259	lincRNA	0.1472	0.2104	0.1272	0.0663	0.0356	0.0875	0.0641
chr2:152012566-152012730	MLT1	tagging	partial	TCONS_00062355	lincRNA	0.3115	0.269	0.285	0.114	0.0226	0.0066	0.0056
chr9:121756046-121756207	MLT1	tagging	partial	Nktr	protein_coding	0.9703	0.7219	0.4851	1.7716	0.8241	0.5802	0.5706
chr12:17095514-17095628	MLT1	tagging	partial	TCONS_00021459	lincRNA	0.0317	0.0274	0.0269	0.0106	0.0008	0	0
chr14:79713147-79713658	MLT1	tagging	partial	TCONS_00033343	lincRNA	0.3373	0.1898	0.252	0.0199	0	0	0.0128
chr1:7528150-7528311	MLT1	tagging	partial	TCONS_00000081	lincRNA	0.0378	0.0095	0	0	0	0.0135	0
chr1:37441198-37441541	MLT1	tagging	partial	Mgat4a	protein_coding	1.6302	0.8139	0.5609	0.5718	0.261	0.1224	0.2865
chr4:39380883-39381103	MLT1	tagging	partial	TCONS_00073311	lincRNA	0.0699	0.1048	0.1044	0	0	0	0
chr4:39380776-39380911	MLT1	tagging	partial	TCONS_00073311	lincRNA	0.0699	0.1048	0.1044	0	0	0	0
chr1:193280432-193280603	MLT1	tagging	partial	TCONS_00003947	lincRNA	0.0096	0.0361	0.0411	0	0	0	0
chr15:76086173-76086226	MLT1	tagging	partial	Nrbp2	protein_coding	0.0206	0	0.044	0.2191	0.0837	0.0184	0.0157
chr13:44567155-44567484	MLT1	tagging	partial	TCONS_00029525	lincRNA	0.008	0.01	0.0343	0.0095	0.0163	0.1645	0.2689
chr9:72916399-72916495	MLT1	tagging	partial	Prtg	protein_coding	0.0141	0.0176	0.0075	0.0083	0	0.0314	0.0859
chr2:34937451-34937600	MLT1	tagging	partial	TCONS_00056255	lincRNA	0.0106	0.0132	0.0958	0.3246	0.0751	0.0941	0.1086
chr13:44566751-44566887	MLT1	tagging	partial	TCONS_00029525	lincRNA	0.008	0.01	0.0343	0.0095	0.0163	0.1645	0.2689
chr1:188593049-188593328	MLT1	tagging	partial	lncRNA-OET-01-320	lincRNA	0.0023	0	0.0321	0.0685	0.0047	0.0062	0.0071
chr16:84810119-84810185	MLT1	tagging	partial	Jam2	protein_coding	1.2746	1.7629	1.4431	0.2055	0.1178	0.1205	0.2647
chr13:44566366-44566549	MLT1	tagging	partial	TCONS_00029525	lincRNA	0.008	0.01	0.0343	0.0095	0.0163	0.1645	0.2689
chr13:44567008-44567030	MLT1	tagging	partial	TCONS_00029525	lincRNA	0.008	0.01	0.0343	0.0095	0.0163	0.1645	0.2689
chr7:72329446-72329558	MLT1	tagging	partial	TCONS_00094353	lincRNA	0.4259	0.5042	0.485	0.0873	0	0.0051	0
chr10:122555554-122555678	MLT1	tagging	partial	TCONS_00014012	lincRNA	0.0766	0.0639	0.0954	0.0377	0	0	0
chr11:38492492-38492841	MLT1	tagging	partial	Gm12130	lincRNA	2.4086	2.1657	1.1807	0.4301	0.0296	0	0
chr9:111516295-111516348	MLT1	tagging	partial	TCONS_00104481	lincRNA	0.1003	0.0982	0.0652	0.0103	0	0	0.0133
chr15:76085690-76086142	MLT1	tagging	partial	Nrbp2	protein_coding	0.0206	0	0.044	0.2191	0.0837	0.0184	0.0157
chr8:110438925-110439101	MLT1	tagging	partial	TCONS_00098414	lincRNA	0.277	0.5196	0.2218	0.1637	0.1408	0.2469	0.1582
chr1:7474608-7474886	MLT1	tagging	partial	TCONS_00000072	lincRNA	0.0879	0.1781	0.1819	0.0393	0.0027	0	0
chr10:122557829-122557926	MLT1	tagging	partial	TCONS_00014012	lincRNA	0.0766	0.0639	0.0954	0.0377	0	0	0
chr2:44860788-44861119	MLT1	tagging	partial	Gtdc1	protein_coding	1.0151	1.1649	1.4533	0.6495	0.1457	0.0532	0.0728
chr10:20304188-20304623	MLT1	tagging	partial	TCONS_00008409	lincRNA	0.1137	0.1745	0.1103	0.0367	0.0053	0	0.0039
chr13:74362297-74362342	MLT1	tagging	partial	Ccdc127	protein_coding	0.2943	0.2439	0.274	0.1416	0.1705	0.2593	0.1851
chr10:4391748-4391852	MLT1	tagging	partial	Gm21781	lincRNA	0	0.0083	0.0634	0.8035	0.275	0.1764	0.1709
chr4:126231426-126231575	MLT1	tagging	partial	Map7d1	protein_coding	0.2019	0.2525	0.1014	0.0842	0.0362	0.0106	0.0633
chr2:160486245-160486571	MLT1	tagging	partial	TCONS_00062592	lincRNA	0.1144	0.93	0.3053	0	0	0	0
chr13:41744607-41744861	MLT1	tagging	partial	TCONS_00026806	lincRNA	0.0965	0.161	0.0344	0	0	0	0
chr13:32452675-32452897	MLT1	tagging	partial	TCONS_00026608	lincRNA	0.0961	0.1888	0.1172	0.0325	0.014	0	0
chr4:126231284-126231371	MLT1	tagging	partial	Map7d1	protein_coding	0.2019	0.2525	0.1014	0.0842	0.0362	0.0106	0.0633
chr5:147407165-147407285	MLT1	tagging	partial	TCONS_00083495	lincRNA	0.1118	0.1271	0.0868	0.6127	0.2066	0.0815	0.0697
chr11:72562373-72562482	MLT1	tagging	partial	TCONS_00019347	lincRNA	0.0134	0.0504	0.0143	0	0	0	0
chr2:13162244-13162316	MLT1	tagging	partial	Rsu1	protein_coding	0.1363	0.0853	0.1274	0.0201	0.0693	0.0152	0.026
chr12:111545022-111545127	MLT1	tagging	partial	Eif5	protein_coding	9.0615	9.3765	7.4685	5.1454	11.5067	8.4897	2.8222
chr7:122037353-122037687	MLT1	tagging	partial	Ears2	protein_coding	0.0984	0.1641	0.1051	0.2521	0.1834	0.2193	0.2749
chr2:44479486-44479852	MLT1	tagging	partial	TCONS_00056392	lincRNA	0.1091	0.1114	0.0666	0.0263	0.0023	0	0
chr5:137706850-137707222	MLT1	tagging	partial	TCONS_00079622	lincRNA	0.3476	0.3431	0.2148	0.0649	0.0372	0.0326	0
chr17:88663367-88663484	MLT1	tagging	partial	lncRNA-OET-17-026	lincRNA	9.2381	13.7771	12.5277	0.3641	0.0348	0	0
chr4:133447233-133447606	MLT1	tagging	partial	TCONS_00071677	lincRNA	0.0348	0.0653	0.0558	0	0	0	0
chr11:57382654-57383125	MLT1	tagging	partial	TCONS_00018828	lincRNA	0.7326	0.5379	0.56	0.1229	0.0144	0	0.0036
chr11:20401838-20401958	MLT1	tagging	partial	TCONS_00014713	lincRNA	0.1034	0.1236	0.1391	0.0266	0.0046	0	0.0034
chr11:20402107-20402229	MLT1	tagging	partial	TCONS_00014713	lincRNA	0.1034	0.1236	0.1391	0.0266	0.0046	0	0.0034
chr6:115823002-115823122	MLT1	tagging	partial	TCONS_00085736	lincRNA	1.1421	1.3568	0.6096	0.6076	0.1161	0	0.174
chr12:52573360-52573417	MLT1	tagging	partial	TCONS_00022180	lincRNA	0	0	0.0088	0.0098	0.0084	0.0736	0.0503
chr8:106434527-106434584	MLT1	tagging	partial	TCONS_00101297	lincRNA	0.0125	0.0039	0.0266	0.0111	0	0.0056	0.0048
chr5:36112025-36112257	MLT1	tagging	partial	TCONS_00080779	protein_coding	0.3031	0.4	0.3415	0.0199	0	0	0
chr8:106433762-106433939	MLT1	tagging	partial	TCONS_00101297	lincRNA	0.0125	0.0039	0.0266	0.0111	0	0.0056	0.0048
chr9:18455692-18456185	MLT1	tagging	partial	Zfp558	protein_coding	0.1707	0.1829	0.2238	0.271	0.0942	0.0522	0.0371
chr5:78264305-78264664	MLT1	tagging	partial	TCONS_00077829	lincRNA	0.0149	0.0083	0.0053	0.0098	0.0017	0.0044	0.0038
chr10:96496989-96497270	MLT1	tagging	partial	TCONS_00013274	lincRNA	0	0.0203	0.0346	0	0	0	0
chr6:86349800-86349964	MLT1	tagging	partial	TCONS_00085199	lincRNA	0.0392	0.0204	0.0314	0.0155	0.01	0.0058	0.005
chr17:32496946-32497150	MLT1	tagging	partial	Cyp4f39	protein_coding	1.7119	1.1689	0.4989	0.1799	0.0055	0.063	0.0414
chr6:86349609-86349748	MLT1	tagging	partial	TCONS_00085199	lincRNA	0.0392	0.0204	0.0314	0.0155	0.01	0.0058	0.005
chr2:130266309-130266371	MLT1	tagging	partial	Tmc2	protein_coding	0.0445	0.0318	0.0475	0.1728	0.0323	0	0.0775
chr12:89836628-89836875	MLT1	tagging	partial	TCONS_00025350	lincRNA	0.0338	0.0211	0.012	0.0067	0	0	0
chr2:106465197-106465660	MLT1	tagging	partial	Gm14015	lincRNA	0.026	0.0108	0.0463	0.0205	0	0	0
chr17:88664764-88664911	MLT1	tagging	partial	TCONS_00049151	lincRNA	9.0499	18.9908	16.8069	0.8794	0	0	0
chr5:134403025-134403251	MLT1	tagging	partial	Gtf2ird1	protein_coding	0	0	0.0165	0.2011	0.2044	0.3446	0.5654
chr11:23048862-23049098	MLT1	tagging	partial	TCONS_00014782	lincRNA	0.0416	0.0832	0.0444	0	0.0761	0.0667	0.038
chr11:26547212-26547385	MLT1	tagging	partial	Vrk2	protein_coding	0	0	0	0	0.1666	0.1349	0.1344
chr5:121708490-121708614	MLT1	tagging	partial	TCONS_00082681	lincRNA	0	0	0	0.0535	0.0345	0.0202	0.0172
chr18:24486437-24486519	MLT1	tagging	partial	Rprd1a	protein_coding	0.9946	0.7818	0.7483	1.7135	1.1074	0.3631	0.5411
chr2:130266509-130266586	MLT1	tagging	partial	Tmc2	protein_coding	0.0445	0.0318	0.0475	0.1728	0.0323	0	0.0775
chr4:117306186-117306242	MLT1	tagging	partial	Rnf220	protein_coding	0.1379	0.2709	0.2312	0.0466	0	0	0
chr13:98697533-98697783	MLT1	tagging	partial	TCONS_00030995	lincRNA	3.7618	3.7318	3.051	0.3975	0.0427	0	0.016
chrX:8150652-8150859	MLT1	tagging	partial	Tbc1d25	protein_coding	0.6968	0.7162	0.3335	0.4072	0.5496	0.1392	0.1159
chr2:130267018-130267142	MLT1	tagging	partial	Tmc2	protein_coding	0.0445	0.0318	0.0475	0.1728	0.0323	0	0.0775
chr2:149843754-149843849	MLT1	tagging	partial	TCONS_00062286	lincRNA	0.4618	0.5405	0.4417	0.0655	0.0038	0	0.0028
chr9:58008162-58008665	MLT1	tagging	partial	TCONS_00103146	lincRNA	0.4629	0.4221	0.2986	0.0456	0.0588	0	0.0073
chr14:123240720-123241193	MLT1	tagging	partial	TCONS_00033915	lincRNA	0.0297	0.0247	0.0176	0	0	0	0
chr9:78131876-78132253	MLT1	tagging	partial	Ick	protein_coding	0.4068	0.537	0.3498	0.0401	0.0919	0.0302	0.0344
chr14:114530596-114530837	MLT1	tagging	partial	TCONS_00033748	lincRNA	0.0459	0	0.0196	0	0	0	0
chr16:44162943-44163128	MLT1	tagging	partial	Naa50	protein_coding	13.5818	10.8183	9.8285	5.607	1.837	2.7331	2.136
chr6:71458405-71458758	MLT1	tagging	partial	RP24-419M4.4	lincRNA	0.0282	0	0.1504	0.533	0.6874	0.6278	0.3648
chr6:30386114-30386214	MLT1	tagging	partial	Zc3hc1	protein_coding	0.0232	0	0.1609	0.8359	0.978	0.6612	0.3443
chr15:33762605-33762783	MLT1	tagging	partial	TCONS_00038818	lincRNA	0.1723	0.1693	0.2102	0.0485	0.0042	0	0
chr8:109447434-109447705	MLT1	tagging	partial	TCONS_00101362	lincRNA	0.8944	1.2627	0.9239	0.1194	0	0	0
chr1:172114312-172114682	MLT1	tagging	partial	Copa	protein_coding	4.5716	5.0762	4.5857	1.258	2.0031	1.8618	2.1611
chr9:47240954-47241429	MLT1	tagging	partial	TCONS_00105907	lincRNA	0.3615	0.1644	0.2456	0.0777	0.0111	0	0
chr12:109389436-109389907	MLT1	tagging	partial	TCONS_00025680	lincRNA	0.1093	0.0684	0.1556	0.0215	0.037	0	0
chr5:90600421-90600570	MLT1	tagging	partial	Rassf6	protein_coding	0.5618	0.5662	0.4028	0.0991	0	0	0
chr4:33702344-33702642	MLT1	tagging	partial	TCONS_00073209	lincRNA	0.0493	0.019	0.0284	0.0045	0	0	0
chr5:116324694-116324863	MLT1	tagging	partial	TCONS_00082503	lincRNA	0.1981	0.2212	0.204	0.0084	0	0	0
chr4:119224289-119224413	MLT1	tagging	partial	4930538K18Rik	protein_coding	0.8976	0.8717	0.9225	0.683	0.2378	0.1064	0.0945
chr9:78132646-78132790	MLT1	tagging	partial	Ick	protein_coding	0.4068	0.537	0.3498	0.0401	0.0919	0.0302	0.0344
chr15:90304163-90304306	MLT1	tagging	partial	TCONS_00037829	lincRNA	0.341	0.2941	0.3389	0.0139	0	0	0
chr17:67405398-67405546	MLT1	tagging	partial	TCONS_00048763	lincRNA	0.069	0.1209	0.0442	0	0	0	0.021
chr10:66539378-66539584	MLT1	tagging	partial	TCONS_00012490	lincRNA	0.0104	0.0049	0.0166	0	0.0013	0	0
chr6:30384958-30385118	MLT1	tagging	partial	Zc3hc1	protein_coding	0.0232	0	0.1609	0.8359	0.978	0.6612	0.3443
chr6:30385632-30385741	MLT1	tagging	partial	Zc3hc1	protein_coding	0.0232	0	0.1609	0.8359	0.978	0.6612	0.3443
chr17:36881941-36882079	MLT1	tagging	partial	Trim40	protein_coding	0.1843	0.1383	0.1967	0	0.2248	0	0
chr17:36881696-36881897	MLT1	tagging	partial	Trim40	protein_coding	0.1843	0.1383	0.1967	0	0.2248	0	0
chr7:30037219-30037751	MLT1	tagging	partial	Zfp14	protein_coding	0.072	0.0386	0.0329	0	0	0.0092	0.0235
chr12:42163475-42163774	MLT1	tagging	partial	TCONS_00024472	lincRNA	0.2409	0.4518	0.3616	0.0445	0	0	0
chr7:122193978-122194223	MLT1	tagging	partial	TCONS_00092020	lincRNA	0.6836	1.1597	0.7805	0.1898	0.0302	0	0
chrX:152277070-152277431	MLT1	tagging	partial	Kdm5c	protein_coding	0.6199	0.5501	0.4749	0.3664	0.5488	0.2673	0.3769
chrX:167241843-167242076	MLT1	tagging	partial	TCONS_00113405	protein_coding	0.2009	0.2252	0.0813	0.0164	0.007	0	0.0106
chrX:57937349-57937621	MLT1	tagging	partial	TCONS_00109023	lincRNA	0.0416	0.0624	0.0089	0.0098	0	0	0
chr12:7870964-7871311	MLT1	tagging	partial	TCONS_00023715	lincRNA	0.1069	0	0.057	0.0316	0	0	0
chr2:80196449-80196854	MLT1	tagging	partial	TCONS_00056944	lincRNA	0.0911	0.4844	0.4135	0.0269	0	0	0
chr2:44479957-44480143	MLT1	tagging	partial	TCONS_00056392	lincRNA	0.1091	0.1114	0.0666	0.0263	0.0023	0	0
chr1:64748250-64748697	MLT1	tagging	partial	TCONS_00005314	lincRNA	0.1022	0.0479	0.0819	0.0151	0	0.0114	0
chr1:64748080-64748205	MLT1	tagging	partial	TCONS_00005314	lincRNA	0.1022	0.0479	0.0819	0.0151	0	0.0114	0
chr1:106766577-106766834	MLT1	tagging	partial	Vps4b	protein_coding	0.3331	0.3439	0.3515	0.142	0.2048	0.2382	0.2832
chr14:18987033-18987401	MLT1	tagging	partial	TCONS_00034161	lincRNA	0.4569	0.6023	0.4878	0.1022	0	0	0
chr5:122681696-122681939	MLT1	tagging	partial	P2rx7	protein_coding	0	0	0.0196	0.0325	0.0839	0.1797	0.1047
chr18:25892072-25892145	MLT1	tagging	partial	TCONS_00051392	lincRNA	0.1074	0.2164	0.1401	0.0212	0.0061	0	0
chr2:152134248-152134459	MLT1	tagging	partial	TCONS_00062357	lincRNA	0	0.0127	0	0.0121	0	0	0
chr5:122682088-122682152	MLT1	tagging	partial	P2rx7	protein_coding	0	0	0.0196	0.0325	0.0839	0.1797	0.1047
chr4:117306460-117307055	MLT1	tagging	partial	Rnf220	protein_coding	0.1379	0.2709	0.2312	0.0466	0	0	0
chr2:135296264-135296774	MLT1	tagging	partial	Plcb1	protein_coding	0.3252	0.3786	0.2633	0.0928	0.0114	0	0
chr2:149845331-149845484	MLT1	tagging	partial	TCONS_00062286	lincRNA	0.4618	0.5405	0.4417	0.0655	0.0038	0	0.0028
chr7:43594472-43594653	MLT1	tagging	partial	Zfp719	protein_coding	0.0443	0.0277	0.0413	0.3793	0.0787	0.1183	0.0885
chr12:81755057-81755409	MLT1	tagging	partial	TCONS_00022726	lincRNA	0.0807	0.1388	0.1508	0.0358	0.0308	0.0719	0.0845
chr11:4940784-4940972	MLT1	tagging	partial	Nefh	protein_coding	2.5303	2.4743	1.9842	0.5955	0.1097	0.0641	0.0457
chr16:87668394-87668700	MLT1	tagging	partial	TCONS_00044174	lincRNA	0.0427	0.0534	0.0911	0.0336	0.0072	0.0063	0.0271
chr10:74683219-74683299	MLT1	tagging	partial	TCONS_00012616	protein_coding	0.0137	0.0123	0.0084	0	0.005	0	0
chr8:21254648-21254728	MLT1	tagging	partial	TCONS_00099447	lincRNA	0.0441	0.0771	0.047	0.125	0.0537	0	0.0067
chrX:66024438-66024618	MLT1	tagging	partial	TCONS_00109115	lincRNA	0.0347	0.0723	0.0987	0	0	0	0
chr11:23574610-23574717	MLT1	tagging	partial	0610010F05Rik	protein_coding	0.1412	0.2295	0.1507	0.1168	0.0431	0	0.1398
chr10:58803749-58803820	MLT1	tagging	partial	TCONS_00012250	lincRNA	0.0407	0.0436	0.0155	0.0206	0.0177	0.0078	0.0022
chr8:20579223-20579409	MLT1	tagging	partial	Gm21092	protein_coding	0.0652	0.0583	0.0099	0.2314	0.3316	0.4985	0.7311
chr9:24179983-24180208	MLT1	tagging	partial	TCONS_00105411	lincRNA	0.5383	0.3951	0.3997	0.083	0.0238	0.0104	0
chr5:148639820-148639969	MLT1	tagging	partial	TCONS_00083524	lincRNA	0.0986	0.1179	0.1602	0.0051	0.0131	0.0038	0.0033
chr13:17700056-17700197	MLT1	tagging	partial	TCONS_00026303	protein_coding	0.0187	0	0	0.3198	0.3414	0.1746	0.206
chr10:79973931-79974133	MLT1	tagging	partial	Grin3b	protein_coding	0	0	0	0.1159	0.4318	0.0874	0.0747
chr9:103521747-103521894	MLT1	tagging	partial	TCONS_00104168	lincRNA	0.4911	1.0236	0.6116	0	0	0	0
chr8:19694100-19694280	MLT1	tagging	partial	Gm6483	protein_coding	0.0609	0.0507	0.0433	0.096	0.1238	0.2351	0.4018
chr7:28190713-28190841	MLT1	tagging	partial	Dyrk1b	protein_coding	0.2858	0.2954	0.2366	0.4965	0.2016	0.078	0.0511
chr15:27174839-27174940	MLT1	tagging	partial	TCONS_00038705	lincRNA	0.0826	0	0.0881	0.0651	0	0	0
chr12:84026509-84026793	MLT1	tagging	partial	TCONS_00022781	protein_coding	0.0067	0.0167	0.0427	0.0079	0	0	0
chr2:149843465-149843496	MLT1	tagging	partial	TCONS_00062286	lincRNA	0.4618	0.5405	0.4417	0.0655	0.0038	0	0.0028
chr10:120542313-120542790	MLT1	tagging	partial	TCONS_00010755	lincRNA	0.0771	0.1928	0.1235	0.0152	0.0784	0.0115	0.0489
chr18:35502666-35502911	MLT1	tagging	partial	TCONS_00049863	lincRNA	0.0175	0.0218	0.0373	0.0103	0	0	0.0066
chr12:44547657-44547822	MLT1	tagging	partial	TCONS_00024482	lincRNA	0.3039	0.157	0.2186	0.0391	0.0067	0	0.005
chr11:51581456-51581732	MLT1	tagging	partial	Col23a1	protein_coding	0.1186	0.089	0.211	0.2524	0.0161	0.0211	0.012
chr17:83152387-83152723	MLT1	tagging	partial	TCONS_00049039	lincRNA	0.4133	0.3981	0.6082	0.1189	0.0284	0	0.0213
chr16:31529535-31530036	MLT1	tagging	partial	TCONS_00043288	lincRNA	0	0.5828	0.2073	0	0	0	0
chr8:126055514-126055627	MLT1	tagging	partial	TCONS_00098895	lincRNA	0.0085	0.0106	0.013	0	0.0012	0	0.0009
chr8:88028840-88028989	MLT1	tagging	partial	TCONS_00097827	lincRNA	0.2876	0.5558	0.2512	0	0.0266	0	0
chr3:102704724-102704939	MLT1	tagging	partial	TCONS_00065364	lincRNA	0.0567	0.0425	0.1815	0	0	0	0
chr8:99149505-99149680	MLT1	tagging	partial	CUFF.45216.1	lincRNA	1.2568	0.9611	0.8814	0.3929	0.0211	0	0.004
chr5:3471854-3472068	MLT1	tagging	partial	Cdk6	protein_coding	0.0858	0.0715	0.0458	0	0.0145	0.0255	0.0327
chr2:49020271-49020595	MLT1	tagging	partial	Mbd5	protein_coding	0.1102	0.1503	0.0962	0.0474	0	0.1071	0.1373
chr12:84026959-84027156	MLT1	tagging	partial	TCONS_00022781	protein_coding	0.0067	0.0167	0.0427	0.0079	0	0	0
chr11:70378460-70378593	MLT1	tagging	partial	TCONS_00019280	lincRNA	0.0221	0.0138	0.0589	0.0522	0.2131	0.0885	0.0588
chr8:123517460-123517670	MLT1	tagging	partial	Gas8	protein_coding	0.3812	0.4528	0.2645	0.0451	0	0	0.0073
chr11:70380124-70380653	MLT1	tagging	partial	TCONS_00019280	lincRNA	0.0221	0.0138	0.0589	0.0522	0.2131	0.0885	0.0588
chr12:70737641-70737864	MLT1	tagging	partial	TCONS_00024915	lincRNA	0.0528	0.0377	0.0724	0	0.0077	0	0
chr3:10469571-10469672	MLT1	tagging	partial	TCONS_00063517	lincRNA	0	0.05	0.1281	0.0158	0.0271	0.0832	0.0203
chr14:45775886-45776062	MLT1	tagging	partial	TCONS_00032503	lincRNA	0.0114	0.0285	0.0852	0.3775	0	0	0
chr7:119599363-119599445	MLT1	tagging	partial	Acsm2	protein_coding	0.0467	0.0167	0.0428	0	0.0068	0	0
chr1:42302670-42302831	MLT1	tagging	partial	TCONS_00004819	lincRNA	0.0777	0.0648	0.0967	0	0	0	0
chr5:147550644-147550841	MLT1	tagging	partial	Pan3	protein_coding	6.2051	4.6457	5.0304	3.1101	0.6328	0.6205	0.7392
chr11:4940396-4940683	MLT1	tagging	partial	Nefh	protein_coding	2.5303	2.4743	1.9842	0.5955	0.1097	0.0641	0.0457
chr7:97730488-97730791	MLT1	tagging	partial	Aqp11	protein_coding	0.022	0.0069	0.0235	0.1823	0.2575	0.0245	0.0042
chr11:84234840-84235131	MLT1	tagging	partial	Acaca	protein_coding	0.0391	0	0.0334	0.1203	0.1433	0.1675	0.0835
chr5:90645002-90645180	MLT1	tagging	partial	TCONS_00081667	lincRNA	0.4145	0.2915	0.4517	0.1429	0	0	0
chr9:50089677-50089846	MLT1	tagging	partial	TCONS_00102921	lincRNA	0	0	0.0788	0.1841	0.05	0	0.0062
chr12:91682826-91682924	MLT1	tagging	partial	Ston2	protein_coding	0.033	0	0.0352	0.156	0	0	0
chr11:109234499-109234732	MLT1	tagging	partial	Rgs9	protein_coding	0.2238	0.0746	0.1752	0.0882	0	0.0133	0.0227
chr15:5703892-5704043	MLT1	tagging	partial	CUFF.16489.1	lincRNA	0.4482	0.4701	0.463	0.0684	0	0	0
chr7:19937727-19937913	MLT1	tagging	partial	Igsf23	protein_coding	1.1582	1.3047	0.8787	0.0679	0.0195	0.0171	0
chr14:75578795-75579063	MLT1	tagging	partial	Spert	protein_coding	0.3512	0.4392	0.3337	0.0319	0.0078	0	0
chr6:90519028-90519229	MLT1	tagging	partial	Aldh1l1	protein_coding	1.3454	2.0648	1.632	0	0	0	0.0932
chr11:109234168-109234285	MLT1	tagging	partial	Rgs9	protein_coding	0.2238	0.0746	0.1752	0.0882	0	0.0133	0.0227
chr11:55158493-55158597	MLT1	tagging	partial	Slc36a2	protein_coding	0	0	0.0297	0	0	0	0
chr12:91682604-91682693	MLT1	tagging	partial	Ston2	protein_coding	0.033	0	0.0352	0.156	0	0	0
chr2:131072232-131072308	MLT1	tagging	partial	Siglec1	protein_coding	0	0	0	0.0945	0	0	0
chr16:44718762-44718909	MLT1	tagging	partial	TCONS_00041800	lincRNA	0.0269	0.0252	0.0861	0.2463	0.0273	0.024	0.0512
chr14:34233138-34233294	MLT1	tagging	partial	Fam35a	protein_coding	0.3241	0.3879	0.2224	0.0657	0.0235	0.0124	0.0071
chr14:68432611-68432958	MLT1	tagging	partial	TCONS_00033116	lincRNA	0.3167	0.3074	0.3336	0.0591	0	0	0
chr11:90620344-90620559	MLT1	tagging	partial	Stxbp4	protein_coding	0.4151	0.8825	0.5908	0.0982	0.0422	0	0
chr14:17045062-17045159	MLT1	tagging	partial	TCONS_00034138	lincRNA	0.0238	0.0419	0.0484	0.0038	0	0	0
chr10:39046476-39046681	MLT1	tagging	partial	Lama4	protein_coding	0.6809	0.5259	0.5345	0.071	0	0.0179	0.0305
chr6:148660414-148660775	MLT1	tagging	partial	TCONS_00089113	lincRNA	3.3127	2.3182	2.4006	1.0045	0.0785	0.0078	0
chr9:50089374-50089531	MLT1	tagging	partial	TCONS_00102921	lincRNA	0	0	0.0788	0.1841	0.05	0	0.0062
chr7:34838447-34838601	MLT1	tagging	partial	TCONS_00090226	lincRNA	0.9854	0.7506	0.7746	0.0741	0.0273	0	0
chr4:58710677-58710760	MLT1	tagging	partial	TCONS_00073788	lincRNA	0.014	0.0281	0.018	0.01	0.0029	0	0.0021
chr2:130268387-130268596	MLT1	tagging	partial	Tmc2	protein_coding	0.0445	0.0318	0.0475	0.1728	0.0323	0	0.0775
chr7:19937578-19937678	MLT1	tagging	partial	Igsf23	protein_coding	1.1582	1.3047	0.8787	0.0679	0.0195	0.0171	0
chr14:22603595-22603767	MLT1	tagging	partial	1700112E06Rik	protein_coding	0.07	0.0437	0.0432	0.0044	0	0	0
chr2:161365892-161366249	MLT1	tagging	partial	TCONS_00058608	lincRNA	0.0144	0.0072	0.0216	0.0034	0.0015	0	0
chr16:8578527-8578789	MLT1	tagging	partial	Abat	protein_coding	0.1299	0.1137	0.1664	0.0307	0.0528	0.0232	0.0099
chr2:152109993-152110319	MLT1	tagging	partial	Srxn1	protein_coding	0	0.0836	0.0428	0.2845	0.1902	0.3217	0.336
chr7:27212644-27212932	MLT1	tagging	partial	Itpkc	protein_coding	0	0	0	2.7337	1.4364	0.916	0.0978
chr19:12716319-12716510	MLT1	tagging	partial	Keg1	protein_coding	0.2992	0.5388	0.4089	0.0142	0	0	0.0091
chr6:91726657-91726786	MLT1	tagging	partial	Slc6a6	protein_coding	2.6371	3.558	2.6298	1.3127	6.0668	1.0825	0.7928
chr8:14272860-14272981	MLT1	tagging	partial	TCONS_00099313	lincRNA	0.0242	0.0656	0.125	0.1576	0.0452	0.054	0.04
chr7:6514093-6514230	MLT1	tagging	partial	TCONS_00092741	protein_coding	0.1759	0.0916	0.0782	0	0	0	0
chr2:24891686-24891944	MLT1	tagging	partial	Ehmt1	protein_coding	0	0	0.0231	0.2733	0.1028	0.0386	0.055
chr16:5486117-5486480	MLT1	tagging	partial	TCONS_00040746	lincRNA	0.0087	0.0072	0.0093	0.0651	0.0029	0.08	0.0088
chr6:148660849-148660970	MLT1	tagging	partial	TCONS_00089113	lincRNA	3.3127	2.3182	2.4006	1.0045	0.0785	0.0078	0
chr1:178954221-178954315	MLT1	tagging	partial	Smyd3	protein_coding	0.4159	0.3634	0.3041	0.0404	0.029	0.0355	0.0738
chr7:37446865-37447237	MLT1	tagging	partial	TCONS_00090294	lincRNA	0.0759	0.0569	0.0972	0.0179	0	0	0
chr8:32886508-32886590	MLT1	tagging	partial	TCONS_00096775	lincRNA	0.0393	0.021	0	0.0066	0	0	0
chr2:142461281-142461741	MLT1	tagging	partial	TCONS_00062173	protein_coding	0.0138	0	0.022	0.0813	0.014	0	0
chr5:127580920-127581024	MLT1	tagging	partial	TCONS_00079300	lincRNA	2.2664	3.0953	2.1964	0.1555	0.0315	0.0069	0
chr8:32886807-32886924	MLT1	tagging	partial	TCONS_00096775	lincRNA	0.0393	0.021	0	0.0066	0	0	0
chr2:84947407-84947642	MLT1	tagging	partial	Slc43a3	protein_coding	1.0115	1.4499	0.8164	0.5542	0.6771	2.2429	0.8643
chrX:112347004-112347232	MLT1	tagging	partial	Apool	protein_coding	0.2273	0.1777	0.1213	0.0168	0.0433	0.0633	0.1298
chr7:30055454-30055679	MLT1	tagging	partial	Zfp82	protein_coding	0.3313	0.2193	0.3017	0.2419	0.0396	0.0695	0.0519
chr18:11974457-11974588	MLT1	tagging	partial	Tmem241	protein_coding	0.3515	0.4677	0.4131	0.0534	0.0262	0.0086	0.027
chr1:162502453-162502529	MLT1	tagging	partial	TCONS_00007222	lincRNA	0.0382	0.0159	0.0272	0	0	0	0
chr8:42598294-42598501	MLT1	tagging	partial	TCONS_00100133	lincRNA	0.0105	0.0059	0.0041	0	0	0.0008	0
chr14:49277578-49277908	MLT1	tagging	partial	TCONS_00032623	lincRNA	0.0126	0.0043	0.0024	0.0068	0	0.002	0.0035
chr11:90532204-90532712	MLT1	tagging	partial	Stxbp4	protein_coding	0.2831	0.0833	0.2489	0.0984	0	0	0.0254
chr2:144174664-144174854	MLT1	tagging	partial	TCONS_00062201	lincRNA	0.2717	0.4247	0.2175	0	0	0	0
chr15:55257370-55257455	MLT1	tagging	partial	Deptor	protein_coding	2.387	1.441	1.2008	0.3082	0.4741	0.6725	0.5851
chr1:37871759-37871900	MLT1	tagging	partial	TCONS_00000704	protein_coding	1.2403	1.6327	1.1847	0	0.0664	0	0.0994
chr5:122137697-122137913	MLT1	tagging	partial	Ccdc63	protein_coding	0.0136	0.0509	0.0217	0.1604	0.0483	0.0121	0
chr7:24540399-24540479	MLT1	tagging	partial	Irgq	protein_coding	0.0087	0	0.0279	2.7072	1.925	0.6635	0.5338
chr6:53885811-53886032	MLT1	tagging	partial	Cpvl	protein_coding	0.2457	0.3937	0.4181	0.0545	0	0.0068	0
chr2:136178029-136178140	MLT1	tagging	partial	Pak7	protein_coding	1.0534	1.0214	1.0104	0.2076	0.0078	0	0
chr7:24539983-24540042	MLT1	tagging	partial	Irgq	protein_coding	0.0087	0	0.0279	2.7072	1.925	0.6635	0.5338
chr5:142257636-142257714	MLT1	tagging	partial	TCONS_00083301	lincRNA	0.1292	0.0539	0.115	0.0255	0	0	0
chr11:83608410-83608540	MLT1	tagging	partial	Ccl6	protein_coding	0.0481	0.0601	0.044	0.0081	0.007	0	0.0052
chr9:95890009-95890176	MLT1	tagging	partial	Atr	protein_coding	0.3291	0.0686	0.0293	0.0162	0	0.0367	0.0627
chr2:5118605-5118773	MLT1	tagging	partial	TCONS_00055595	lincRNA	0.0101	0.1135	0.1938	0.0596	0.0308	0	0
chr7:24538815-24538966	MLT1	tagging	partial	Irgq	protein_coding	0.0087	0	0.0279	2.7072	1.925	0.6635	0.5338
chr11:32640613-32640926	MLT1	tagging	partial	TCONS_00018319	lincRNA	0	0	0.0438	0.3272	0.0313	0.0274	0.0625
chrX:40387005-40387089	MLT1	tagging	partial	TCONS_00111506	lincRNA	0.0243	0.0012	0	0.0022	0	0	0
chr5:21487929-21488058	MLT1	tagging	partial	Fam185a	protein_coding	0.3669	0.1147	0.2938	0	0	0	0
chr1:39663626-39663716	MLT1	tagging	partial	TCONS_00000749	lincRNA	0.7471	0.6045	0.3002	0.0416	0.0089	0	0.0134
chr4:115756958-115757159	MLT1	tagging	partial	Efcab14	protein_coding	1.4736	1.2214	1.0792	0.8306	0.1045	0.0916	0.1566
chr4:134868066-134868118	MLT1	tagging	partial	Rhd	protein_coding	1.9678	1.9139	1.8672	0	0	0	0
chr17:36254859-36254976	MLT1	tagging	partial	Rpp21	protein_coding	0.8199	0.6836	0.1751	0.0431	0.6853	0.4223	0.3053
chr9:95890402-95890466	MLT1	tagging	partial	Atr	protein_coding	0.3291	0.0686	0.0293	0.0162	0	0.0367	0.0627
chr7:24540186-24540216	MLT1	tagging	partial	Irgq	protein_coding	0.0087	0	0.0279	2.7072	1.925	0.6635	0.5338
chr7:82002297-82002745	MLT1	tagging	partial	TCONS_00091162	lincRNA	0.0087	0.0218	0.0093	0	0	0	0
chr14:52021467-52021537	MLT1	tagging	partial	TCONS_00032710	lincRNA	0.1163	0.0291	0.0248	0.2612	0.13	0.1037	0.0531
chr15:40276385-40276555	MLT1	tagging	partial	TCONS_00036739	lincRNA	0.0312	0.0488	0.075	0.0277	0	0	0
chr16:10319878-10320002	MLT1	tagging	partial	TCONS_00040947	lincRNA	0.1166	0.0972	0.166	0.0919	0	0	0
chr10:39671601-39671946	MLT1	tagging	partial	TCONS_00008750	lincRNA	0.0566	0.0088	0.0679	0.0251	0.0072	0.0126	0.0431
chr4:127865902-127866024	MLT1	tagging	partial	TCONS_00075098	lincRNA	0	0.0886	0.126	0.0279	0	0	0
chr14:18988255-18988447	MLT1	tagging	partial	TCONS_00034161	lincRNA	0.4569	0.6023	0.4878	0.1022	0	0	0
chr15:40277748-40277954	MLT1	tagging	partial	TCONS_00036739	lincRNA	0.0312	0.0488	0.075	0.0277	0	0	0
chr7:30975023-30975196	MLT1	tagging	partial	Fam187b	protein_coding	0.9244	0.7917	0.3785	0.0449	0	0.0339	0.0096
chr14:87862049-87862207	MLT1	tagging	partial	TCONS_00033436	lincRNA	0.1317	0.136	0.0428	0	0	0	0
chr11:21044676-21044915	MLT1	tagging	partial	TCONS_00018022	lincRNA	0.0249	0.0467	0.0266	0.0147	0.0253	0	0
chr9:89315944-89316118	MLT1	tagging	partial	TCONS_00103900	lincRNA	0.2487	0.1943	0.0332	0.0367	0	0	0
chr19:15734050-15734167	MLT1	tagging	partial	TCONS_00054528	lincRNA	0.0302	0.0034	0.0029	0	0.0028	0	0
chr10:122140662-122140733	MLT1	tagging	partial	TCONS_00010805	protein_coding	0.1659	0.1646	0.1955	0.044	0.0087	0	0.0022
chr18:66242558-66242767	MLT1	tagging	partial	TCONS_00052113	lincRNA	0.0529	0.1984	0.1412	0.0313	0	0	0
chr6:48417218-48417283	MLT1	tagging	partial	Krba1	protein_coding	0.5009	0.6264	0.2025	0.009	0.1852	0.1285	0.0983
chr8:26488314-26488414	MLT1	tagging	partial	TCONS_00099706	lincRNA	0.0281	0.0234	0.02	0	0	0	0.0036
chr14:49540227-49540447	MLT1	tagging	partial	TCONS_00032646	lincRNA	0.0796	0.0996	0.0255	0.0094	0	0	0
chr18:83486134-83486201	MLT1	tagging	partial	TCONS_00050892	lincRNA	0.1372	0.1716	0.1239	0.0686	0.0107	0	0
chr16:11674973-11675079	MLT1	tagging	partial	Snx29	protein_coding	0.3587	0.7102	0.3829	0.2827	0.2279	0.04	0.0228
chr19:42651036-42651231	MLT1	tagging	partial	TCONS_00053552	lincRNA	2.6033	1.9365	1.4709	0.209	0.0186	0	0
chr15:80429694-80429802	MLT1	tagging	partial	TCONS_00039744	lincRNA	0.6233	0.6479	0.5271	0.1483	0.0082	0	0
chr5:142249027-142249097	MLT1	tagging	partial	TCONS_00083299	lincRNA	0.2929	0.5493	0.3439	0.0346	0	0	0
chr4:136770455-136770572	MLT1	tagging	partial	Ephb2	protein_coding	0.0142	0.0177	0	0.0503	0	0.0506	0.1081
chr7:143897577-143897746	MLT1	tagging	partial	Gm498	protein_coding	0.2602	0.1953	0.1945	0.0615	0	0	0
chr7:81604449-81604830	MLT1	tagging	partial	Homer2	protein_coding	0.7211	0.6813	0.6603	0.2084	0.0652	0.06	0.1074
chr2:59587514-59587809	MLT1	tagging	partial	TCONS_00056595	lincRNA	0.3229	0.1731	0.2462	0	0	0	0
chr19:7597523-7597617	MLT1	tagging	partial	Lgals12	protein_coding	0.4223	0.528	0.6085	0.3495	0.0215	0.0188	0.0161
chr2:35990845-35991006	MLT1	tagging	partial	TCONS_00060227	lincRNA	0.2577	0.2707	0.3521	0.1706	0.0105	0	0
chr14:24566629-24566922	MLT1	tagging	partial	TCONS_00031825	lincRNA	0.3242	0.3589	0.3641	0.0399	0.0034	0	0
chr3:69203663-69204055	MLT1	tagging	partial	TCONS_00064578	lincRNA	0.1149	0.1245	0.0245	0	0	0	0
chr7:6158702-6158841	MLT1	tagging	partial	TCONS_00089282	lincRNA	0.0118	0.0074	0.0189	0.0349	0	0.0263	0.018
chr19:48104289-48104437	MLT1	tagging	partial	TCONS_00055249	lincRNA	0.1249	0.2602	0.3332	0.123	0	0	0
chr14:32578622-32578723	MLT1	tagging	partial	Ercc6	protein_coding	0.4821	0.4545	0.4355	0.4297	0.7238	0.2578	0.1751
chr2:152135346-152135480	MLT1	tagging	partial	TCONS_00062357	lincRNA	0	0.0127	0	0.0121	0	0	0
chr16:92348199-92348354	MLT1	tagging	partial	Kcne1	protein_coding	0	0	0.0456	0.0505	0.0759	0	0
chr7:121987352-121987564	MLT1	tagging	partial	TCONS_00095340	lincRNA	0.1228	0	0.0437	0.121	0.2288	0.0912	0.1091
chr6:108076824-108076898	MLT1	tagging	partial	Setmar	protein_coding	2.0275	2.1974	1.467	0.1065	0.0916	0.0602	0.0172
chr8:109491491-109491751	MLT1	tagging	partial	CUFF.45329.1	lincRNA	1.0225	1.1851	1.8103	0.0295	0	0	0
chr1:72301947-72302157	MLT1	tagging	partial	Tmem169	protein_coding	4.6093	5.5004	4.2596	0.5761	0.0268	0.0235	0.01
chr5:127726310-127726508	MLT1	tagging	partial	TCONS_00082919	lincRNA	0.3518	0.4495	0.4817	0.1266	0	0	0
chr1:132804929-132805186	MLT1	tagging	partial	TCONS_00002700	lincRNA	0.4345	0.4155	0.3001	0.1511	0	0	0
chr16:9078096-9078235	MLT1	tagging	partial	TCONS_00042744	lincRNA	0.0544	0.1299	0.0687	0.0058	0	0	0
chr12:31592870-31592968	MLT1	tagging	partial	Bcap29	protein_coding	0.4661	0.4795	0.3401	0.1186	0.1559	0.1157	0.0854
chr8:18888038-18888250	MLT1	tagging	partial	Agpat5	protein_coding	0.408	0.3028	0.1452	0.2392	0.2394	0.1094	0.0581
chr15:60891555-60891708	MLT1	tagging	partial	TCONS_00039185	lincRNA	0.1474	0.0768	0.0918	0	0	0	0
chr10:37676796-37676973	MLT1	tagging	partial	TCONS_00011862	lincRNA	0.0338	0.0169	0.0289	0	0	0	0
chr7:7282526-7282720	MLT1	tagging	partial	TCONS_00092797	lincRNA	0.1579	0.0987	0.1011	0.0187	0.3531	0.2392	0.1563
chr17:80073329-80073392	MLT1	tagging	partial	TCONS_00048988	lincRNA	0.0701	0.0487	0.0997	0	0.0079	0	0
chr2:93363564-93363709	MLT1	tagging	partial	TCONS_00061238	lincRNA	0.0381	0	0.0136	0	0	0	0
chr12:54553172-54553275	MLT1	tagging	partial	TCONS_00022211	lincRNA	0.076	0.0396	0.0203	0.0075	0	0	0
chr12:73811958-73812226	MLT1	tagging	partial	TCONS_00022527	lincRNA	0.5798	0.5801	0.6465	0.1219	0.0065	0	0
chr6:40495734-40496032	MLT1	tagging	partial	TCONS_00084366	protein_coding	0.0306	0.0024	0.0266	0.0339	0.0311	0.0324	0.0248
chr7:120104915-120105168	MLT1	tagging	partial	Tmem159	protein_coding	0.785	0.3272	0.3352	0.8043	2.2343	3.5917	1.8732
chr8:127702890-127703186	MLT1	tagging	partial	TCONS_00101975	lincRNA	1.3275	1.5362	1.6441	0.3881	0.0357	0	0.0016
chr2:164491444-164491799	MLT1	tagging	partial	Dbndd2	protein_coding	0.0501	0.0251	0.0107	0.2252	0.1529	0.0804	0.0229
chr2:84007110-84007376	MLT1	tagging	partial	TCONS_00057013	lincRNA	0.0642	0.2756	0.271	0.0231	0.0028	0	0
chr15:78755946-78756021	MLT1	tagging	partial	Mfng	protein_coding	0.6888	0.8014	0.3197	0.0071	0.0061	0	0.0091
chr19:5079570-5079702	MLT1	tagging	partial	Tmem151a	protein_coding	0.347	0.2963	0.0632	0.2501	0	0.0075	0
chr16:21641227-21641385	MLT1	tagging	partial	Vps8	protein_coding	0.4005	0.2862	0.2443	0.4734	0.1745	0.102	0.0871
chr8:14127016-14127385	MLT1	tagging	partial	CUFF.43669.1	lincRNA	0.039	0.0488	0.0139	0.0077	0	0	0
chr6:67297343-67297440	MLT1	tagging	partial	Serbp1	protein_coding	0.5953	0.5685	0.4705	0.3274	0.6122	0.8289	0.8137
chr18:34150052-34150221	MLT1	tagging	partial	TCONS_00051498	lincRNA	0.2042	0.2554	0.1962	0.0483	0	0	0
chr17:36854901-36854987	MLT1	tagging	partial	Trim26	protein_coding	0.5546	0.3579	0.3628	0.1586	0.0546	0.0478	0.2725
chr17:56269263-56269329	MLT1	tagging	partial	Ticam1	protein_coding	0.0451	0.0322	0.0413	0.3733	0.4585	0.4365	0.2356
chr6:72126633-72126877	MLT1	tagging	partial	TCONS_00087551	lincRNA	0.1772	0.1801	0.0828	0	0	0.0148	0.0127
chr8:61465915-61466136	MLT1	tagging	partial	TCONS_00097264	lincRNA	0.006	0.0075	0.0257	0.0142	0	0	0.0183
chr9:97068322-97068499	MLT1	tagging	partial	Gm26767	lincRNA	0	0.0249	0.0426	0.4718	1.0344	0.3557	0.1975
chr10:43348277-43348378	MLT1	tagging	partial	Pdss2	protein_coding	1.8882	1.8968	1.9148	0.3646	0.4798	0.0898	0.0863
chr7:121586032-121586437	MLT1	tagging	partial	TCONS_00095332	lincRNA	0.1694	0.2082	0.1563	0.0271	0	0	0
chr12:17099980-17100021	MLT1	tagging	partial	TCONS_00021459	lincRNA	0.0317	0.0274	0.0269	0.0106	0.0008	0	0
chr15:78942235-78942330	MLT1	tagging	partial	Nol12	protein_coding	1.7394	1.471	1.1592	0.6181	0.971	0.3764	0.2833
chr8:10747649-10747769	MLT1	tagging	partial	lncRNA-OET-08-318	lincRNA	0.8114	1.1098	1.1639	0.0899	0	0	0
chr2:78835966-78836213	MLT1	tagging	partial	TCONS_00060975	lincRNA	0.0192	0.024	0.0614	0	0	0	0
chr15:80213829-80214014	MLT1	tagging	partial	Mgat3	protein_coding	0.007	0	0.015	0.4316	0.2212	0.8135	0.1123
chr9:99620946-99621297	MLT1	tagging	partial	A4gnt	protein_coding	0.161	0.2517	0.043	0	0.0136	0	0
chr2:166800584-166800634	MLT1	tagging	partial	Trp53rkb	protein_coding	0.2293	0.1649	0.0673	0.2169	0.1865	0.1073	0.1703
chr17:47623610-47623709	MLT1	tagging	partial	Gm20517	protein_coding	7.6362	6.1033	0.8974	3.6995	3.9406	1.457	0.7114
chr15:83867356-83867541	MLT1	tagging	partial	Efcab6	protein_coding	5.3322	4.4552	3.7779	1.1158	0.024	0	0
chr9:62080326-62080682	MLT1	tagging	partial	Glce	protein_coding	0.1497	0.0702	0.1198	0.2212	0.038	0.0167	0.1283
chr12:54394629-54394816	MLT1	tagging	partial	TCONS_00022206	protein_coding	0.2482	0.1647	0.0703	0.006	0.0206	0	0.027
chr5:75652197-75652287	MLT1	tagging	partial	Kit	protein_coding	2.8076	2.495	1.9432	0.7538	0.0627	0.0092	0.0157
chr18:69860875-69860945	MLT1	tagging	partial	TCONS_00050583	lincRNA	0.0193	0	0.0062	0.0023	0	0	0
chr2:74794310-74794450	MLT1	tagging	partial	TCONS_00056861	lincRNA	0.1016	0.244	0.1389	0.0192	0	0	0
chr6:115941575-115941653	MLT1	tagging	partial	TCONS_00088406	lincRNA	0.3276	0.3385	0.2129	0.0168	0	0	0
chr2:69796355-69796619	MLT1	tagging	partial	Phospho2	protein_coding	21.2878	28.7685	24.3435	8.9437	1.3374	0.2443	0.2505
chr11:25789252-25789452	MLT1	tagging	partial	TCONS_00014841	lincRNA	0.2478	0.3457	0.346	0.0676	0	0	0
chr17:36855025-36855151	MLT1	tagging	partial	Trim26	protein_coding	0.5546	0.3579	0.3628	0.1586	0.0546	0.0478	0.2725
chr12:17689037-17689245	MLT1	tagging	partial	TCONS_00023905	lincRNA	0.138	0.0863	0.1228	0.0272	0	0	0
chr5:111984646-111984887	MLT1	tagging	partial	TCONS_00082302	lincRNA	0.0294	0.0147	0.0376	0	0	0	0
chr13:58443427-58443595	MLT1	tagging	partial	TCONS_00027356	lincRNA	3.0206	2.833	1.4657	0.1623	0	0	0
chr1:162503238-162503450	MLT1	tagging	partial	TCONS_00007222	lincRNA	0.0382	0.0159	0.0272	0	0	0	0
chr2:171949503-171949648	MLT1	tagging	partial	TCONS_00058899	lincRNA	0.7951	0.6929	0.4115	0	0	0	0
chr5:149897092-149897169	MLT1	tagging	partial	TCONS_00083564	lincRNA	0.1832	0.1273	0.2064	0.0241	0	0.0091	0
chr1:75312833-75313008	MLT1	tagging	partial	TCONS_00001490	lincRNA	0.0508	0.0413	0.0407	0.2705	0.2869	0.3852	0.275
chr7:91327231-91327417	MLT1	tagging	partial	TCONS_00091325	lincRNA	0	0.2875	0.2454	0.0073	0	0	0
chr1:188592789-188593020	MLT1	tagging	partial	lncRNA-OET-01-320	lincRNA	0.0023	0	0.0321	0.0685	0.0047	0.0062	0.0071
chr11:35086337-35086387	MLT1	tagging	partial	TCONS_00015002	lincRNA	0.7224	0.9281	0.6655	0.2457	0.2414	0.0088	0.0075
chr2:45403087-45403326	MLT1	tagging	partial	TCONS_00056414	lincRNA	0.0046	0.0172	0.0098	0	0	0	0
chr3:104472099-104472286	MLT1	tagging	partial	Lrig2	protein_coding	0.0368	0.0329	0.0393	0.0186	0.0107	0.0187	0.0681
chr4:90192220-90192282	MLT1	tagging	partial	Gm12629	lincRNA	0.0677	0.0953	0.0723	0.04	0	0	0
chr7:117673938-117674225	MLT1	tagging	partial	TCONS_00095216	lincRNA	0.0151	0.0753	0.1125	0	0	0	0
chr19:15735185-15735267	MLT1	tagging	partial	TCONS_00054528	lincRNA	0.0302	0.0034	0.0029	0	0.0028	0	0
chrX:162812202-162812422	MLT1	tagging	partial	Txlng	protein_coding	4.614	5.4009	5.6413	1.6175	1.6907	0.5021	0.3882
chr1:186248831-186249022	MLT1	tagging	partial	TCONS_00007845	lincRNA	0.2092	0.1798	0.1395	0	0	0	0
chr15:61792850-61793086	MLT1	tagging	partial	TCONS_00039238	lincRNA	0	0.0234	0.06	0	0	0	0
chr14:22613020-22613138	MLT1	tagging	partial	1700112E06Rik	protein_coding	0.07	0.0437	0.0432	0.0044	0	0	0
chr9:46373973-46374201	MLT1	tagging	partial	TCONS_00105899	protein_coding	0	0	0.0608	0.0505	0	0.0127	0
chr16:38497489-38497577	MLT1	tagging	partial	Timmdc1	protein_coding	0.2171	0.1323	0.0594	0.1053	0.1641	0.1836	0.1696
chr4:32507265-32507388	MLT1	tagging	partial	TCONS_00069761	protein_coding	0.0302	0.0472	0.0403	0.0134	0.0077	0	0
chr14:40899338-40899480	MLT1	tagging	partial	TCONS_00034646	lincRNA	0.0258	0.0092	0.0236	0.0392	0.0112	0.0033	0.0309
chrX:130663553-130663869	MLT1	tagging	partial	TCONS_00110036	lincRNA	0.0289	0.0181	0.027	0.0043	0	0.0064	0.0138
chr1:190445989-190446169	MLT1	tagging	partial	TCONS_00003859	lincRNA	1.3023	1.2945	0.8555	0.079	0	0	0
chr2:106464504-106464834	MLT1	tagging	partial	Gm14015	lincRNA	0.026	0.0108	0.0463	0.0205	0	0	0
chr6:113340615-113340712	MLT1	tagging	partial	Camk1	protein_coding	0.051	0	0	0.2412	0.2592	0.1818	1.2428
chr17:26642804-26642949	MLT1	tagging	partial	Ergic1	protein_coding	0.4301	0.4337	0.2666	0.1312	0.0423	0.0618	0.0951
chr17:15887397-15887493	MLT1	tagging	partial	TCONS_00047228	lincRNA	1.1416	1.6391	1.4218	0.05	0	0	0
chr16:3780753-3780849	MLT1	tagging	partial	TCONS_00040623	lincRNA	0.0125	0.0104	0.0445	0.7147	0.1399	0.0334	0.073
chr14:33215288-33215456	MLT1	tagging	partial	lncRNA-OET-14-031	lincRNA	0.9484	1.0389	0.6861	1.8069	0.1673	0.0699	0.1373
chr5:122833074-122833139	MLT1	tagging	partial	TCONS_00082746	lincRNA	0.0304	0.019	0.0162	0.018	0.4323	0.0948	0
chr18:41352452-41352533	MLT1	tagging	partial	TCONS_00050012	lincRNA	0.0167	0.0348	0.0594	0	0	0	0
chr18:24009833-24009982	MLT1	tagging	partial	Zfp191	protein_coding	0.1371	0.1617	0.1631	0.1019	0.0319	0.1013	0.1074
chr1:159132239-159132424	MLT1	tagging	partial	TCONS_00007149	lincRNA	0.1126	0.0939	0.0481	0.1243	0.0305	0.0067	0.0057
chr11:42788412-42788520	MLT1	tagging	partial	TCONS_00018456	lincRNA	0.1131	0.0471	0.0335	0	0	0	0
chr13:114220261-114220486	MLT1	tagging	partial	TCONS_00028486	lincRNA	0.163	0.2574	0.119	0.071	0	0.0076	0.0131
chr9:88714036-88714237	MLT1	tagging	partial	Mthfsl	protein_coding	0.2203	0.1127	0.2352	0.0474	0.0611	0.0089	0.0534
chr10:65534348-65534509	MLT1	tagging	partial	TCONS_00012416	protein_coding	0.1233	0.1982	0.1692	0	0	0	0
chr4:40201803-40201994	MLT1	tagging	partial	Aco1	protein_coding	1.0989	1.1746	0.8192	0.0435	0.0936	0.2189	0.1823
chr1:61310805-61310905	MLT1	tagging	partial	TCONS_00001207	lincRNA	0.6478	0.5626	0.6531	0.0213	0	0	0
chr5:119468942-119469407	MLT1	tagging	partial	TCONS_00082575	lincRNA	0.4373	0.4125	0.303	0.0635	0	0	0
chr2:181828161-181828308	MLT1	tagging	partial	Myt1	protein_coding	0.8005	0.8249	0.4114	0.2015	0.0301	0	0
chr7:80098535-80098628	MLT1	tagging	partial	Idh2	protein_coding	0	0	0.0455	0.4535	1.0398	1.9374	2.3371
chr6:115939085-115939145	MLT1	tagging	partial	Rho	protein_coding	0.0093	0.0349	0.0298	0.022	0	0	0
chr14:24570541-24570769	MLT1	tagging	partial	TCONS_00031827	lincRNA	0.0154	0.0322	0.0604	0.0122	0	0	0
chr1:51509699-51510042	MLT1	tagging	partial	TCONS_00004933	lincRNA	1.2294	1.5243	1.8684	0.1971	0.0106	0	0.0079
chr7:38220599-38220744	MLT1	tagging	partial	Plekhf1	protein_coding	0.0308	0.0154	0.0394	0.1237	0.2377	0.4608	0.5437
chr7:121578293-121578440	MLT1	tagging	partial	TCONS_00095332	lincRNA	0.1694	0.2082	0.1563	0.0271	0	0	0
chr7:127490315-127490438	MLT1	tagging	partial	Fbrs	protein_coding	7.3061	5.9001	5.0029	2.0521	1.2351	0.9283	0.4927
chr16:11661092-11661159	MLT1	tagging	partial	Snx29	protein_coding	1.2756	0.9235	0.9317	0.6746	0.4095	0.0898	0.1023
chr5:3953147-3953296	MLT1	tagging	partial	Akap9	protein_coding	0.1557	0.0649	0.0775	0.0245	0.0211	0.0093	0.0711
chr5:122275158-122275376	MLT1	tagging	partial	TCONS_00079138	lincRNA	0.1754	0.2193	0.2247	0.0829	0	0	0
chr18:38973949-38974412	MLT1	tagging	partial	TCONS_00049979	lincRNA	0.0222	0.0278	0.0474	0.0131	0	0	0
chr7:25665652-25665765	MLT1	tagging	partial	Exosc5	protein_coding	0.6585	0.6767	0.1183	1.2719	1.2593	0.494	0.3128
chr1:166947658-166948064	MLT1	tagging	partial	TCONS_00007370	lincRNA	0.0972	0.1041	0.1333	0.0164	0	0	0
chr1:191660273-191660419	MLT1	tagging	partial	TCONS_00003898	lincRNA	0.058	0.2321	0.3179	0.0274	0.0118	0	0
chr16:11884511-11884577	MLT1	tagging	partial	Cpped1	protein_coding	0	0.0262	0.0224	0	0.1278	0.0747	0.1916
chr6:108509692-108510154	MLT1	tagging	partial	Itpr1	protein_coding	0.4355	0.3717	0.2952	0.1798	0.0141	0.0062	0.0158
chr13:33986994-33987154	MLT1	tagging	partial	Serpinb6a	protein_coding	0.1257	0.1048	0.1342	0	0.1278	0.0747	0.1595
chr9:47252902-47253054	MLT1	tagging	partial	TCONS_00105911	lincRNA	0.1211	0.1641	0.1401	0.0239	0	0	0
chr2:172196987-172197065	MLT1	tagging	partial	TCONS_00062990	lincRNA	0.1846	0.1949	0.2189	0.0388	0.0042	0	0
chr7:125922581-125922927	MLT1	tagging	partial	TCONS_00092073	lincRNA	0.045	0	0.048	0.4122	0.0686	0.0301	0.0086
chr2:113120631-113121065	MLT1	tagging	partial	lncRNA-OET-02-145	lincRNA	0	0	0.0678	0.2629	0	0	0
chr14:76367931-76368332	MLT1	tagging	partial	TCONS_00035590	lincRNA	0.6994	0.6247	0.9599	0.0591	0	0	0.038
chr7:122191219-122191438	MLT1	tagging	partial	TCONS_00092020	lincRNA	0.6836	1.1597	0.7805	0.1898	0.0302	0	0
chr9:42145027-42145164	MLT1	tagging	partial	TCONS_00102768	lincRNA	1.4273	1.5676	1.0467	0.3815	0	0	0
chr19:41605025-41605191	MLT1	tagging	partial	TCONS_00053520	lincRNA	0	0.0791	0.0976	0.0249	0.0143	0.0125	0.0054
chr10:86072145-86072364	MLT1	tagging	partial	Syn3	protein_coding	0.0114	0	0.0243	0.0135	0	0.0102	0
chr16:22690578-22690673	MLT1	tagging	partial	TCONS_00041327	lincRNA	0.0881	0.0826	0.1176	0.0521	0	0	0
chr2:168966199-168966275	MLT1	tagging	partial	TCONS_00058846	lincRNA	0.075	0.1563	0.0534	0.266	0.0762	0.1337	0.3808
chr7:83623531-83623653	MLT1	tagging	partial	Tmc3	protein_coding	0.1935	0.3629	0.243	0.0135	0.0058	0	0.0087
chr6:115938840-115939074	MLT1	tagging	partial	Rho	protein_coding	0.0093	0.0349	0.0298	0.022	0	0	0
chr16:11660772-11661003	MLT1	tagging	partial	Snx29	protein_coding	1.2756	0.9235	0.9317	0.6746	0.4095	0.0898	0.1023
chr12:3452689-3452864	MLT1	tagging	partial	Asxl2	protein_coding	0.1146	0.0955	0.163	0.4213	0.3493	0.363	0.4168
chr16:56005356-56005633	MLT1	tagging	partial	Zbtb11	protein_coding	1.1648	0.9559	0.7383	1.8505	0.925	0.9733	0.4436
chr6:91477523-91477597	MLT1	tagging	partial	Tmem43	protein_coding	0.9027	0.1026	0.1752	0.9702	0.4171	0.8046	0.25
chr16:42417457-42417627	MLT1	tagging	partial	TCONS_00043553	lincRNA	0.0252	0.8198	0.4845	0	0	0.0225	0
chr16:13859785-13859861	MLT1	tagging	partial	Pdxdc1	protein_coding	7.0715	6.6532	5.1044	1.5924	0.5477	0.5403	0.8207
chr4:82682090-82682261	MLT1	tagging	partial	TCONS_00070524	protein_coding	0.0156	0.0098	0.0389	0.0031	0	0	0
chr15:76368309-76368502	MLT1	tagging	partial	TCONS_00039544	lincRNA	1.1192	1.4096	0.6913	0.7939	0.5364	0.3492	0.14
chr7:128310545-128310693	MLT1	tagging	partial	TCONS_00095596	lincRNA	1.4709	1.3535	1.7849	0.3363	0.0353	0	0
chr2:166349387-166349778	MLT1	tagging	partial	TCONS_00058755	lincRNA	0.0594	0.0689	0.0407	0.0201	0	0	0
chr14:8296390-8296615	MLT1	tagging	partial	Fam107a	protein_coding	0.0126	0	0.0135	0.015	0	0	0.0482
chr14:12323009-12323222	MLT1	tagging	partial	TCONS_00031587	lincRNA	0.0539	0.0673	0.0431	0	0.0137	0	0
chr5:45203986-45204298	MLT1	tagging	partial	TCONS_00080942	lincRNA	0.1705	0.0656	0.14	0.0155	0	0	0
chr5:122137950-122138127	MLT1	tagging	partial	Ccdc63	protein_coding	0.0136	0.0509	0.0217	0.1604	0.0483	0.0121	0
chrX:90223193-90223361	MLT1	tagging	partial	TCONS_00112280	lincRNA	0	0	0.0195	0	0	0	0
chr6:116679203-116679288	MLT1	tagging	partial	TCONS_00088420	lincRNA	0.0157	0.0065	0.0111	0.0185	0	0	0
chr1:176778891-176778999	MLT1	tagging	partial	Cep170	protein_coding	0.1912	0.1993	0.1361	0.1131	0.324	0.1847	0.0971
chr11:82876334-82876410	MLT1	tagging	partial	Rad51d	protein_coding	1.3886	1.6714	1.0659	0.3013	0.1639	0.1391	0.1584
chr3:27344875-27345024	MLT1	tagging	partial	TCONS_00063789	lincRNA	0.0355	0.0666	0.0189	0.021	0	0	0
chr4:126231625-126231886	MLT1	tagging	partial	Map7d1	protein_coding	0.2019	0.2525	0.1014	0.0842	0.0362	0.0106	0.0633
chr8:123403166-123403262	MLT1	tagging	partial	Tcf25	protein_coding	8.5479	7.3853	5.309	1.2494	2.6542	1.0805	0.9943
chr13:111368351-111368525	MLT1	tagging	partial	Gm6270	lincRNA	0.1425	0.3564	0.2282	0	0	0	0
chr15:43367169-43367378	MLT1	tagging	partial	TCONS_00038996	lincRNA	0.2651	0.2526	0.2965	0.0075	0	0	0
chr15:96008486-96008664	MLT1	tagging	partial	TCONS_00040193	lincRNA	0.0206	0	0.0055	0	0	0	0
chr14:79251433-79251668	MLT1	tagging	partial	TCONS_00033324	lincRNA	0.095	0.1005	0.0546	0	0.0074	0	0
chr10:64488998-64489078	MLT1	tagging	partial	Ctnna3	protein_coding	0.1597	0.0571	0.1827	0.0405	0	0	0
chr1:167935715-167935953	MLT1	tagging	partial	TCONS_00007396	lincRNA	0.1093	0.1055	0.0967	0.0406	0.0032	0	0
chr4:40773954-40774067	MLT1	tagging	partial	TCONS_00073366	lincRNA	2.0204	2.6444	2.1855	0.0478	0.0548	0.024	0.0821
chr8:108365672-108365999	MLT1	tagging	partial	TCONS_00098309	lincRNA	0.0424	0.0186	0.0158	0	0.0022	0	0
chr10:45993539-45993830	MLT1	tagging	partial	TCONS_00008933	lincRNA	0.1987	0.2067	0.1633	0.0374	0.0071	0	0
chr17:66524059-66524289	MLT1	tagging	partial	TCONS_00048753	lincRNA	0.0289	0.0723	0.0308	0	0	0	0
chr7:30287000-30287094	MLT1	tagging	partial	TCONS_00090130	lincRNA	0.0049	0.0061	0.0261	0.0693	0.0397	0.0044	0.0074
chr5:100679702-100680047	MLT1	tagging	partial	Hpse	protein_coding	2.6533	1.4257	1.3941	0.5882	0.0211	0.037	0.0316
chr8:31523308-31523635	MLT1	tagging	partial	TCONS_00096759	lincRNA	0.0149	0.0558	0.0635	0	0	0	0
chr5:49047215-49047397	MLT1	tagging	partial	TCONS_00081063	lincRNA	0.0242	0.0057	0.0032	0	0.0015	0.0013	0
chr7:30285702-30285860	MLT1	tagging	partial	TCONS_00090130	lincRNA	0.0049	0.0061	0.0261	0.0693	0.0397	0.0044	0.0074
chr7:89136570-89136652	MLT1	tagging	partial	Tmem135	protein_coding	0.6834	0.9116	0.616	0.1257	0.0412	0.1218	0.0925
chr4:62388719-62388802	MLT1	tagging	partial	Slc31a1	protein_coding	0.9815	1.0739	0.8818	0.9766	0.3741	0.3645	0.4423
chr7:105732622-105732880	MLT1	tagging	partial	Rrp8	protein_coding	8.6774	9.663	10.7505	4.4181	3.4768	1.7501	1.3024
chr3:97288979-97289606	MLT1	tagging	partial	TCONS_00065256	lincRNA	0.0105	0.0588	0.0446	0.0062	0.0106	0	0.008
chr14:41170081-41170152	MLT1	tagging	partial	Sftpd	protein_coding	0.0125	0.0312	0.0267	0	0	0.0056	0
chrX:73357921-73358022	MLT1	tagging	partial	Zfp275	protein_coding	0.0054	0.0068	0.0291	0.1867	0.0166	0.0922	0.1078
chr6:54992065-54992189	MLT1	tagging	partial	Ggct	protein_coding	2.7929	1.7178	1.816	0.4625	0.0185	0.0081	0.0208
chr6:54991994-54992006	MLT1	tagging	partial	Ggct	protein_coding	2.7929	1.7178	1.816	0.4625	0.0185	0.0081	0.0208
chr13:26700154-26700380	MLT1	tagging	partial	TCONS_00029167	lincRNA	0.0362	0.0113	0.0193	0.0214	0	0	0
chr11:70635794-70635910	MLT1	tagging	partial	TCONS_00019294	lincRNA	0.017	0.0213	0.0303	0.1073	0.0288	0.0202	0.0259
chr6:97504791-97504863	MLT1	tagging	partial	TCONS_00088124	lincRNA	0.4918	0.4362	0.5128	0.2772	0.0581	0.0102	0.0131
chr1:57359183-57359348	MLT1	tagging	partial	4930558J18Rik	lincRNA	0.0486	0.0101	0.0346	0.0096	0.0165	0	0.0555
chr17:83319432-83319522	MLT1	tagging	partial	TCONS_00049041	protein_coding	0.1642	0.2212	0.1349	0	0.0128	0	0
chr1:19336585-19336807	MLT1	tagging	partial	TCONS_00000334	lincRNA	0.0556	0.0795	0.0551	0.0047	0.004	0	0
chr3:30545313-30545505	MLT1	tagging	partial	Mecom	protein_coding	0.0653	0.07	0.0199	0.2535	0.0948	0.0332	0.0781
chr3:100494601-100495063	MLT1	tagging	partial	TCONS_00065331	protein_coding	2.8181	3.1664	1.4816	0.2114	0.0595	0.0956	0.0495
chr11:79781425-79781524	MLT1	tagging	partial	9130204K15Rik	lincRNA	4.8611	3.1893	0.9136	0.1619	0	0.0305	0.0261
chr19:27580708-27580859	MLT1	tagging	partial	TCONS_00054751	lincRNA	0.1576	0.335	0.2355	0.0373	0	0	0
chr8:61468637-61468742	MLT1	tagging	partial	TCONS_00097264	lincRNA	0.006	0.0075	0.0257	0.0142	0	0	0.0183
chr15:28151477-28151652	MLT1	tagging	partial	TCONS_00038734	lincRNA	0.0315	0.0492	0.0168	0	0	0	0.006
chr3:103005363-103005854	MLT1	tagging	partial	Sike1	protein_coding	0.0166	0.0069	0.0324	0.137	0.2413	0.0787	0.1282
chr17:9326592-9326729	MLT1	tagging	partial	TCONS_00044759	lincRNA	0.911	1.0227	0.8399	0.1346	0.0105	0.0031	0.0026
chr6:99919300-99919387	MLT1	tagging	partial	TCONS_00085511	lincRNA	0.416	0.5444	0.5989	0.2745	0	0	0.0074
chr18:38507580-38507683	MLT1	tagging	partial	TCONS_00051618	lincRNA	0.1853	0.2538	0.3769	0.0104	0	0	0.0538
chr3:142936126-142936246	MLT1	tagging	partial	TCONS_00068878	lincRNA	0.1122	0.3741	0.306	0.0147	0.0127	0.0111	0
chr6:99589274-99589403	MLT1	tagging	partial	TCONS_00088161	lincRNA	0.1569	0.049	0.1465	0.0927	0.0199	0.0175	0
chr2:172607942-172608005	MLT1	tagging	partial	TCONS_00058928	lincRNA	0.2782	0.2609	0.3341	0.0822	0	0.062	0
chr4:5885985-5886057	MLT1	tagging	partial	TCONS_00072635	lincRNA	0.0262	0.0219	0	0	0	0	0
chr7:99780080-99780130	MLT1	tagging	partial	F730035P03Rik	lincRNA	0	0	0	0.7249	0.4285	0.0342	0.0292
chr8:125391481-125391542	MLT1	tagging	partial	TCONS_00098858	lincRNA	0.2443	2.0654	1.9618	0.055	0.0059	0	0.0089
chr16:91138415-91138887	MLT2	3' exon	full	TCONS_00044279	lincRNA	0.5912	0.7392	0.4207	0	0	0	0
chr18:10227585-10227888	MLT2	3' exon	full	TCONS_00049374	lincRNA	0.4988	0.3119	0.5325	0.2948	0	0.4446	0
chr2:44455026-44455353	MLT2	3' exon	partial	TCONS_00060352	lincRNA	0.6072	0.3797	0.1852	0.0513	0	0	0
chr11:8667642-8668014	MLT2	3' exon	partial	TCONS_00017754	lincRNA	0.0621	0.0259	0.1105	0	0	0.0738	0.0236
chr7:71282505-71282998	MLT2	3' exon	partial	TCONS_00094348	lincRNA	0.0996	0.1245	0.1063	0	0	0	0
chr18:42686332-42686792	MLT2	3' exon	partial	Ppp2r2b	protein_coding	0.9819	0.7913	1.0482	0.1032	0	0	0
chr11:89918874-89919313	MLT2	3' exon	partial	TCONS_00016478	lincRNA	0.5757	0.5235	0.391	0	0	0	0
chr6:8256027-8256254	MLT2	3' exon	partial	Rpa3	protein_coding	6.8552	6.1414	5.8979	0.8467	1.0401	0.912	0.8572
chr15:3385846-3386226	MLT2	3' exon	partial	Ghr	protein_coding	0	0.0421	0	0	0	0	0
chr5:116332862-116333186	MLT2	3' exon	partial	lncRNA-OET-05-360	lincRNA	1.3267	2.2811	1.2392	0.2941	0	0	0
chr10:14385784-14386047	MLT2	5' exon	full	TCONS_00008284	lincRNA	0.4454	0.8046	0.5283	0	0	0	0
chrX:71984715-71985071	MLT2	5' exon	full	Fate1	protein_coding	0.2534	0	0.2705	0	0	0	0
chr18:44671930-44672094	MLT2	5' exon	partial	TCONS_00050078	lincRNA	0.0838	0.1048	0.0894	0	0	0	0
chr1:114813711-114814141	MLT2	5' exon	partial	TCONS_00002366	lincRNA	0.0399	0	0.0071	0	0.0203	0	0
chr9:86686611-86687048	MLT2	5' exon	partial	Me1	protein_coding	20.0707	29.8651	29.8173	3.8726	0.0605	0.1593	0
chr12:100466748-100467078	MLT2	5' exon	partial	lncRNA-OET-12-060	lincRNA	2.3443	1.4346	1.4909	1.946	0.9127	1.0226	1.8994
chr2:19973386-19973500	MLT2	5' exon	partial	TCONS_00059697	protein_coding	0.3164	0.1978	0.1351	0	0	0	0
chr1:82415581-82415909	MLT2	5' exon	partial	TCONS_00005704	lincRNA	0.3308	0.2068	0.1766	1.1733	0	0	0.2519
chr12:24466523-24466680	MLT2	5' exon	partial	TCONS_00021741	lincRNA	0.0303	0.0379	0.097	0	0	0	0
chr10:108543538-108543781	MLT2	5' exon	partial	TCONS_00010385	lincRNA	6.0788	6.4181	4.1965	0.4303	0	0	0
chrX:75166142-75166237	MLT2	5' exon	partial	TCONS_00109353	lincRNA	0.1994	0.3428	0.0532	0	0	0	0.019
chr10:43700501-43701171	MLT2	5' exon	partial	TCONS_00012052	lincRNA	0.2012	0.549	0.4687	0	0.0186	0	0
chr3:36479176-36479607	MLT2	internal exon	partial	1810062G17Rik	protein_coding	0.9873	0.4115	0.7026	0.3891	0	0	0
chr6:134065982-134066420	MLT2	internal exon	partial	Etv6	protein_coding	0.6023	0	0	1.1868	6.3268	0.8948	0.7645
chr12:86584714-86584812	MLT2	internal exon	partial	TCONS_00022883	lincRNA	0.7424	0.3095	0	0	0	0	0
chr9:65453265-65453416	MLT2	internal exon	partial	Mtfmt	protein_coding	0.3499	0.4025	0.3735	0.1324	0.128	0.1622	0.1812
chr10:116132561-116132783	MLT2	internal exon	partial	lncRNA-OET-10-408	lincRNA	4.4031	5.5061	4.7003	1.3014	0.373	0	0
chr1:157889739-157890081	MLT2	internal exon	partial	TCONS_00003163	lincRNA	1.438	2.1578	1.228	0	0	0	0
chr17:26283960-26284076	MLT2	tagging	partial	Luc7l	protein_coding	0.5019	0.2984	0.4128	0.5058	2.0658	1.32	0.5451
chr5:42984106-42984385	MLT2	tagging	partial	TCONS_00077293	lincRNA	0.0162	0.099	0.1019	0.0024	0	0	0
chr11:74379086-74379414	MLT2	tagging	partial	TCONS_00016002	lincRNA	0.0892	0.1953	0.0953	0.0527	0	0	0
chr15:92371481-92371635	MLT2	tagging	partial	Gm26760	lincRNA	0.0574	0.0319	0.0476	0.0528	0.013	0.0114	0.034
chr10:5568364-5568502	MLT2	tagging	partial	TCONS_00011168	lincRNA	0	0.0073	0.0934	0.3243	0.0356	0.0364	0.0222
chr2:180004154-180004304	MLT2	tagging	partial	TCONS_00063310	lincRNA	0.0811	0.0761	0.0649	0.048	0	0	0
chr18:56935424-56935584	MLT2	tagging	partial	TCONS_00050367	lincRNA	0.0721	0.0451	0.1282	0.284	0.0366	0	0
chr13:109944079-109944525	MLT2	tagging	partial	TCONS_00031230	lincRNA	0.1388	0.09	0.0933	0.0061	0	0	0
chr15:92370919-92371059	MLT2	tagging	partial	Gm26760	lincRNA	0.0574	0.0319	0.0476	0.0528	0.013	0.0114	0.034
chr2:144528890-144529307	MLT2	tagging	partial	Polr3f	protein_coding	0.5766	0.4206	0.4959	0.303	0.2605	0.1713	0.1952
chr10:124079644-124079774	MLT2	tagging	partial	TCONS_00014045	lincRNA	0.2397	0.1689	0.1256	0.0103	0	0	0
chr18:56935896-56935980	MLT2	tagging	partial	TCONS_00050367	lincRNA	0.0721	0.0451	0.1282	0.284	0.0366	0	0
chr15:96020252-96020382	MLT2	tagging	partial	TCONS_00040193	lincRNA	0.0206	0	0.0055	0	0	0	0
chr2:133370750-133371004	MLT2	tagging	partial	TCONS_00062064	lincRNA	0.0247	0.0371	0.037	0.0117	0.0025	0.0022	0
chr18:56935248-56935408	MLT2	tagging	partial	TCONS_00050367	lincRNA	0.0721	0.0451	0.1282	0.284	0.0366	0	0
chr7:44500535-44500643	MLT2	tagging	partial	Fam71e1	protein_coding	0.1298	0.2434	0.0693	0	0.033	0.0578	0
chr15:35936556-35936956	MLT2	tagging	partial	Cox6c	protein_coding	2.0313	3.1957	1.3174	0.4906	1.3988	1.6159	1.938
chr7:129227025-129227514	MLT2	tagging	partial	TCONS_00092241	lincRNA	0.0785	0.2618	0.3352	0	0	0	0
chr10:7216811-7216948	MLT2	tagging	partial	TCONS_00008142	lincRNA	0.0535	0.0287	0.0082	0.0271	0.0078	0	0
chr5:65801158-65801247	MLT2	tagging	partial	N4bp2	protein_coding	1.3645	0.6749	0.587	0.3973	0.1656	0.1271	0.1706
chr7:36324511-36324604	MLT2	tagging	partial	TCONS_00093764	lincRNA	0.0267	0.0333	0.1423	0	0	0	0
chr14:35962930-35963244	MLT2	tagging	partial	TCONS_00034538	lincRNA	0.5918	0.4625	0.3685	0.0292	0.0084	0	0
chr18:45147545-45147648	MLT2	tagging	partial	TCONS_00050097	lincRNA	0.0052	0.0098	0.0028	0.0031	0	0	0
chr16:30850693-30851047	MLT2	tagging	partial	TCONS_00041457	lincRNA	2.2512	2.719	2.5555	0.4414	0.067	0	0
chr11:69727659-69727864	MLT2	tagging	partial	TCONS_00015805	lincRNA	0	0	0	0	0	0	0.0233
chr11:8667404-8667501	MLT2	tagging	partial	TCONS_00017754	lincRNA	0.0621	0.0259	0.1105	0	0	0.0738	0.0236
chr10:121249890-121250056	MLT2	tagging	partial	CUFF.5987.1	lincRNA	0.0306	0.0143	0.0204	0	0.0078	0	0
chr10:87985059-87985118	MLT2	tagging	partial	lncRNA-OET-10-136	lincRNA	0	0	0	1.1559	0.0469	0.0164	0
chr10:121250062-121250162	MLT2	tagging	partial	CUFF.5987.1	lincRNA	0.0306	0.0143	0.0204	0	0.0078	0	0
chr13:114215638-114216138	MLT2	tagging	partial	TCONS_00031348	lincRNA	0.194	0.299	0.3515	0.0267	0.0046	0.0201	0.0412
chr11:69727462-69727615	MLT2	tagging	partial	TCONS_00015805	lincRNA	0	0	0	0	0	0	0.0233
chr16:56098964-56099061	MLT2	tagging	partial	Senp7	protein_coding	0.1913	0.1472	0.1257	0.0522	0.0898	0.0525	0.0785
chr6:145456833-145456999	MLT2	tagging	partial	TCONS_00086292	lincRNA	0.04	0.0438	0.0374	0.0237	0	0	0.0038
chr5:116870834-116871164	MLT2	tagging	partial	TCONS_00082523	lincRNA	0.6515	0.8147	0.4173	0	0	0	0
chr6:11477284-11477380	MLT2	tagging	partial	TCONS_00086541	lincRNA	0.0822	0.0457	0.0195	0.0324	0	0	0
chr1:185757105-185757168	MLT2	tagging	partial	lncRNA-OET-01-631	lincRNA	0.9144	1.5134	0.89	0.1272	0	0	0
chr6:85989010-85989385	MLT2	tagging	partial	TCONS_00087811	lincRNA	0.02	0.0333	0.0498	0.0236	0.0745	0.2376	0.0304
chr14:26128036-26128111	MLT2	tagging	partial	Duxbl2	protein_coding	0.2227	0.7736	0.7132	0.5266	0.2012	0.0882	0.0377
chr14:26267685-26267760	MLT2	tagging	partial	Duxbl3	protein_coding	0.2483	0.0259	0.0442	0.1468	0.0526	0.0646	0.0394
chr3:99219834-99220210	MLT2	tagging	partial	Wars2	protein_coding	0.2724	0.2044	0.1817	0.0966	0.8583	0.3095	0.1763
chr17:8519392-8519569	MLT2	tagging	partial	TCONS_00044731	lincRNA	0.1114	0.1045	0.0694	0.022	0.0094	0	0
chr10:58808780-58809101	MLT2	tagging	partial	TCONS_00012250	lincRNA	0.0407	0.0436	0.0155	0.0206	0.0177	0.0078	0.0022
chr11:22757067-22757259	MLT2	tagging	partial	Gm12057	protein_coding	0.0295	0.0431	0.0473	0.0116	0	0	0
chr14:45776251-45776766	MLT2	tagging	partial	TCONS_00032503	lincRNA	0.0114	0.0285	0.0852	0.3775	0	0	0
chr5:30976276-30976398	MLT2	tagging	partial	Tcf23	protein_coding	0	0	0	0.0427	0.4954	0.3298	0.2681
chr14:76359489-76359594	MLT2	tagging	partial	TCONS_00035586	lincRNA	0.0901	0.0433	0.0592	0.0246	0	0	0
chr7:121582820-121583042	MLT2	tagging	partial	TCONS_00095332	lincRNA	0.1694	0.2082	0.1563	0.0271	0	0	0
chrX:17612499-17612654	MLT2	tagging	partial	Fundc1	protein_coding	0	0.0289	0.0247	0	0	0	0
chr5:46985370-46985853	MLT2	tagging	partial	TCONS_00080995	lincRNA	0.1167	0.1042	0.0712	0.0066	0	0	0
chr4:98903725-98903960	MLT2	tagging	partial	TCONS_00074354	lincRNA	1.7854	1.8915	2.33	0.6734	0.0876	0	0.0036
chr14:25988417-25988492	MLT2	tagging	partial	Duxbl1	protein_coding	1.429	1.5636	2.3154	1.5386	0.415	0.3412	0.1943
chr5:135405516-135405633	MLT2	tagging	partial	Hip1	protein_coding	0.4656	0.3016	0.2874	0.2785	1.2887	1.2799	1.4696
chr14:66593255-66593456	MLT2	tagging	partial	TCONS_00033093	lincRNA	0.189	0.2512	0.2522	0	0	0	0
chr3:96792350-96792766	MLT2	tagging	partial	TCONS_00068062	lincRNA	0.018	0.0226	0.0963	0.1919	0.0917	0.2411	0.206
chr18:13360046-13360533	MLT2	tagging	partial	TCONS_00049454	lincRNA	0.1837	0.1723	0.1308	0.1086	0	0.0136	0
chr10:123107711-123107844	MLT2	tagging	partial	Usp15	protein_coding	3.4149	2.4251	2.2783	1.0485	0.1796	0.1607	0.1317
chr2:43251769-43251877	MLT2	tagging	partial	TCONS_00060336	lincRNA	0.0566	0.0413	0.0302	0.0279	0	0	0
chr6:104520388-104520638	MLT2	tagging	partial	TCONS_00088236	lincRNA	0	0	0.029	0.0321	0	0	0
chrX:82359351-82359446	MLT2	tagging	partial	TCONS_00112211	lincRNA	0	0.0073	0	0.0069	0	0	0
chr5:26682253-26682370	MLT2	tagging	partial	TCONS_00080519	lincRNA	0.171	0.095	0.2028	0.0225	0	0	0
chr16:38495799-38495879	MLT2	tagging	partial	Timmdc1	protein_coding	0.2171	0.1323	0.0594	0.1053	0.1641	0.1836	0.1696
chr4:119175651-119176034	MLT2	tagging	partial	Ermap	protein_coding	0.0195	0	0.0104	0.0346	0.0099	0	0
chr5:26682664-26682861	MLT2	tagging	partial	TCONS_00080519	lincRNA	0.171	0.095	0.2028	0.0225	0	0	0
chr10:57709714-57709983	MLT2	tagging	partial	Pkib	protein_coding	0.139	0.226	0.2968	0.0329	0.0141	0	0
chr11:103881136-103881300	MLT2	tagging	partial	Nsf	protein_coding	6.0843	4.7264	4.0347	0.4048	0.174	0.4695	0.2909
chr15:22154039-22154182	MLT2	tagging	partial	TCONS_00036452	lincRNA	0.353	0.538	0.3062	0.013	0	0	0
chrX:82360486-82360614	MLT2	tagging	partial	TCONS_00112211	lincRNA	0	0.0073	0	0.0069	0	0	0
chr10:37676195-37676288	MLT2	tagging	partial	TCONS_00011862	lincRNA	0.0338	0.0169	0.0289	0	0	0	0
chr3:39906358-39906451	MLT2	tagging	partial	TCONS_00064126	lincRNA	0.0422	0.0264	0.0338	0	0.0107	0	0
chr7:91330976-91331357	MLT2	tagging	partial	TCONS_00091325	lincRNA	0	0.2875	0.2454	0.0073	0	0	0
chr19:40827895-40828278	MLT2	tagging	partial	TCONS_00053492	protein_coding	0.2088	0.2175	0.2043	0.1234	0	0.0155	0
chr7:4441687-4441917	MLT2	tagging	partial	Rdh13	protein_coding	0	0.0511	0.0145	0.0644	0.2493	0.1336	0.2179
chr10:111882670-111883102	MLT2	tagging	partial	TCONS_00010463	lincRNA	0.0113	0	0.0091	0.0033	0	0	0
chr8:13820254-13820340	MLT2	tagging	partial	TCONS_00096285	lincRNA	1.2389	1.668	0.6666	0.0177	0	0	0
chr4:119176066-119176099	MLT2	tagging	partial	Ermap	protein_coding	0.0195	0	0.0104	0.0346	0.0099	0	0
chr11:62665384-62665765	MLT2	tagging	partial	TCONS_00015611	lincRNA	0.6241	0.6385	0.3634	0.3577	0.2115	0.2023	0.3457
chr10:122132298-122132479	MLT2	tagging	partial	TCONS_00010804	protein_coding	0.205	0.2183	0.2593	0.0583	0.0116	0	0.0029
chr10:72799319-72799622	MLT2	tagging	partial	TCONS_00009418	lincRNA	0.0243	0.0051	0.0065	0.012	0	0.0036	0.0031
chr2:19973661-19973775	MLT2	tagging	partial	TCONS_00059697	protein_coding	0.3164	0.1978	0.1351	0	0	0	0
chr8:13819840-13820019	MLT2	tagging	partial	TCONS_00096285	lincRNA	1.2389	1.668	0.6666	0.0177	0	0	0
chr19:29027461-29027544	MLT2	tagging	partial	TCONS_00053209	lincRNA	0.0699	0.1136	0.1193	0.0248	0.0213	0.0311	0.0745
chr18:51785931-51786069	MLT2	tagging	partial	TCONS_00051869	lincRNA	0.182	0.2275	0.1511	0.0319	0	0	0
chr2:32970093-32970197	MLT2	tagging	partial	TCONS_00056236	lincRNA	0	0	0.0294	0.2168	0.1492	0.0327	0.0489
chr18:50858858-50859065	MLT2	tagging	partial	TCONS_00051850	protein_coding	0.1895	0.3554	1.2134	0.224	0	0	0
chr11:6123772-6124126	MLT2	tagging	partial	Nudcd3	protein_coding	1.2711	1.1656	0.9434	0.2147	0.0615	0.0863	0.2489
chr5:69574410-69574529	MLT2	tagging	partial	Guf1	protein_coding	0.9671	0.7638	0.8306	0.0602	0.0444	0.0259	0.1108
chr9:70090386-70090499	MLT2	tagging	partial	Fam81a	protein_coding	0.0712	0.0223	0.019	0.021	0	0	0
chr13:15765506-15765603	MLT2	tagging	partial	TCONS_00026251	lincRNA	0.0116	0	0.0124	0	0	0	0
chr4:33702923-33703164	MLT2	tagging	partial	TCONS_00073209	lincRNA	0.0493	0.019	0.0284	0.0045	0	0	0
chr8:72715807-72715976	MLT2	tagging	partial	Nwd1	protein_coding	0.2062	0.182	0.1165	0.043	0	0.0108	0.0046
chrX:60182863-60183092	MLT2	tagging	partial	Mcf2	protein_coding	0.429	0.3874	0.4961	0.0282	0	0.0106	0
chr12:47382819-47383065	MLT2	tagging	partial	TCONS_00024538	lincRNA	0	0	0	0.2223	0.0191	0.0168	0
chr2:34937501-34937635	MLT2	tagging	partial	TCONS_00056255	lincRNA	0.0106	0.0132	0.0958	0.3246	0.0751	0.0941	0.1086
chr13:17954037-17954169	MLT2	tagging	partial	TCONS_00026308	protein_coding	0.0981	0.1022	0.0989	0.1546	0.0388	0	0.0166
chr6:100105010-100105362	MLT2	tagging	partial	TCONS_00088191	lincRNA	0.5493	0.5299	0.4663	0.0557	0.0053	0.0047	0
chr15:92138336-92138643	MLT2	tagging	partial	Cntn1	protein_coding	0.9837	1.467	0.9723	0.2757	0.037	0.0195	0.0111
chr12:105583016-105583214	MLT2	tagging	partial	TCONS_00025614	lincRNA	0.1221	0.1527	0.1694	0.0577	0.0372	0	0
chr10:46093877-46094077	MLT2	tagging	partial	TCONS_00008940	lincRNA	0.1218	0.1108	0.1182	0.0131	0	0	0
chr8:36796827-36796896	MLT2	tagging	partial	TCONS_00096884	lincRNA	0.0032	0.004	0.0068	0	0	0	0
chr3:132431558-132431706	MLT2	tagging	partial	TCONS_00068722	lincRNA	0.0725	0.0577	0.0704	0.0273	0	0	0
chr5:30040106-30040323	MLT2	tagging	partial	TCONS_00080594	lincRNA	0.061	0.0611	0.1694	0.101	0.1985	0.0762	0.0093
chr4:86933982-86934443	MLT2	tagging	partial	Acer2	protein_coding	0	0	0.0122	0.311	0.6511	0.6117	0.27
chr8:36796531-36796755	MLT2	tagging	partial	TCONS_00096884	lincRNA	0.0032	0.004	0.0068	0	0	0	0
chr10:5812451-5812670	MLT2	tagging	partial	Mtrf1l	protein_coding	0.0432	0.0216	0.0461	0.1327	0.1668	0.077	0.0855
chr16:41832298-41832643	MLT2	tagging	partial	TCONS_00043510	lincRNA	0.1111	0.0694	0.0949	0	0	0	0
chr2:26455333-26455563	MLT2	tagging	partial	Notch1	protein_coding	0.0995	0.1082	0.0878	0.1126	0.0528	0.1041	0.0428
chr1:65124043-65124417	MLT2	tagging	partial	Gm28845	protein_coding	0.3359	0.21	0.1034	0.0535	0.0394	0.0058	0
chr6:136352206-136352504	MLT2	tagging	partial	TCONS_00086144	lincRNA	0.1418	0.1048	0.1583	0.0229	0.0066	0	0
chr8:78916227-78916347	MLT2	tagging	partial	TCONS_00100716	lincRNA	0.0696	0.2612	0.1115	0	0	0	0
chr2:44532990-44533087	MLT2	tagging	partial	TCONS_00056410	lincRNA	0.1147	0.1639	0.1924	0.0387	0	0	0
chr5:34226298-34226582	MLT2	tagging	partial	lncRNA-OET-05-277	lincRNA	1.2526	1.2816	1.2358	0.3366	0.0193	0	0
chr4:123811425-123811495	MLT2	tagging	partial	Rhbdl2	protein_coding	0	0	0	0.1667	0.0819	0.1257	0.5215
chr4:123811147-123811303	MLT2	tagging	partial	Rhbdl2	protein_coding	0	0	0	0.1667	0.0819	0.1257	0.5215
chr15:84917024-84917333	MLT2	tagging	partial	Gm29666	protein_coding	0	0	0.0411	0.0546	0.0705	0.0618	0.1173
chr18:15275337-15275522	MLT2	tagging	partial	TCONS_00051233	lincRNA	0.0793	0.2434	0.1847	0.017	0	0	0
chr13:47374615-47374867	MLT2	tagging	partial	TCONS_00026966	lincRNA	0.0744	0.0349	0.0199	0.022	0	0	0
chr11:9866542-9866738	MLT2	tagging	partial	TCONS_00017801	lincRNA	0.0063	0.0039	0.0034	0.0224	0.0016	0	0
chr4:139649579-139649683	MLT2	tagging	partial	Gm21969	protein_coding	3.7741	3.7609	2.5809	0.7669	0.3597	0.6483	1.2875
chr6:35606899-35607026	MLT2	tagging	partial	TCONS_00086916	lincRNA	0.3291	0.5326	0.4133	0.0229	0	0	0
chr17:37542345-37542519	MLT2	tagging	partial	TCONS_00048080	lincRNA	0.0468	0.0219	0.0499	0	0	0	0
chr1:75681879-75682048	MLT2	tagging	partial	TCONS_00001519	lincRNA	0.1105	0.1152	0.0983	0.0218	0	0	0
chr10:71457886-71458137	MLT2	tagging	partial	TCONS_00009384	lincRNA	0.0073	0.0076	0.0169	0.0086	0.0148	0.0032	0.0037
chr6:76097230-76097589	MLT2	tagging	partial	TCONS_00087646	lincRNA	0.0345	0.0431	0.2208	0	0	0	0
chr13:47374507-47374567	MLT2	tagging	partial	TCONS_00026966	lincRNA	0.0744	0.0349	0.0199	0.022	0	0	0
chr14:115212548-115212907	MLT2	tagging	partial	TCONS_00033769	protein_coding	0.0367	0	0.0039	0	0	0	0
chr2:44532600-44532830	MLT2	tagging	partial	TCONS_00056410	lincRNA	0.1147	0.1639	0.1924	0.0387	0	0	0
chr13:41749172-41749320	MLT2	tagging	partial	TCONS_00026800	lincRNA	0.377	0.3094	0.3459	0.2089	0.012	0	0
chr15:60995326-60995679	MLT2	tagging	partial	TCONS_00036990	lincRNA	0.0616	0.1211	0.0564	0	0	0	0
chr10:118977226-118977377	MLT2	tagging	partial	TCONS_00010663	lincRNA	0.1328	0.0712	0.1164	0.0168	0	0	0
chr15:43177829-43178202	MLT2	tagging	partial	TCONS_00036781	lincRNA	0.0157	0.0196	0.0335	0	0	0	0
chr15:43177694-43177771	MLT2	tagging	partial	TCONS_00036781	lincRNA	0.0157	0.0196	0.0335	0	0	0	0
chr5:14014031-14014252	MLT2	tagging	partial	TCONS_00076443	lincRNA	0.0152	0.1137	0.1294	0.0179	0	0	0
chrX:93974886-93975159	MLT2	tagging	partial	AU015836	protein_coding	38.9097	45.9848	47.8309	4.5723	0.5213	0.0762	0.1302
chr14:49281603-49281641	MLT2	tagging	partial	TCONS_00032623	lincRNA	0.0126	0.0043	0.0024	0.0068	0	0.002	0.0035
chr3:88922536-88922594	MLT2	tagging	partial	Dap3	protein_coding	2.7705	3.5415	1.9936	0.1698	0.1565	0.2561	0.3204
chr5:53381984-53382106	MLT2	tagging	partial	TCONS_00081205	lincRNA	0.1797	0.2247	0.277	0	0	0	0
chr13:90111145-90111406	MLT2	tagging	partial	Tmem167	protein_coding	0.2349	0.3545	0.1167	0.1915	0.3458	0.462	0.2745
chr14:64512885-64513274	MLT2	tagging	partial	TCONS_00033034	lincRNA	0.0774	0	0.0929	0.2287	0.0885	0.0172	0.0295
chr17:35441682-35441783	MLT2	tagging	partial	H2-Q7	protein_coding	0	0	0.0176	2.3435	1.4189	0.2871	0.0252
chr9:46242328-46242514	MLT2	tagging	partial	Apoa4	protein_coding	0	0.0338	0	0.1278	0.055	0.0964	0
chr10:8802869-8803086	MLT2	tagging	partial	Sash1	protein_coding	1.8008	2.5589	2.7087	0.6774	0.2496	0.2554	0.2182
chr17:35472468-35472587	MLT2	tagging	partial	H2-Q10	protein_coding	0	0.0122	0.0104	0.4975	0.1393	0.0087	0.0075
chr14:49281178-49281234	MLT2	tagging	partial	TCONS_00032623	lincRNA	0.0126	0.0043	0.0024	0.0068	0	0.002	0.0035
chr14:64513302-64513401	MLT2	tagging	partial	TCONS_00033034	lincRNA	0.0774	0	0.0929	0.2287	0.0885	0.0172	0.0295
chr13:54107852-54108014	MLT2	tagging	partial	Sfxn1	protein_coding	0.052	0.0434	0.037	0.041	0.2645	0.3866	0.5153
chrX:75166386-75166547	MLT2	tagging	partial	TCONS_00109354	lincRNA	0.1157	0.2411	0.0823	0	0	0	0.0294
chr8:64978394-64978899	MT2	3' exon	partial	TCONS_00100410	protein_coding	1.5835	1.5841	2.0284	0.9735	0	0	0
chr5:109549248-109549681	MT2	3' exon	partial	TCONS_00082179	lincRNA	0.2378	0.2602	0.2538	0.1757	0.0604	0.0265	0.0679
chr12:69622729-69623169	MT2	5' exon	full	lncRNA-OET-12-359	lincRNA	0	0	0.1936	3.431	0	0	0
chr1:153938870-153939364	MT2	5' exon	full	lncRNA-OET-01-273	lincRNA	0	0.2181	0.3724	3.9184	3.7238	0	0
chr10:45177725-45178270	MT2	5' exon	full	Popdc3	protein_coding	1.6801	0.4202	0.3587	3.9727	0	0	0.5118
chr4:59138815-59139313	MT2	5' exon	full	AI481877	protein_coding	0	0.4435	0	4.1934	2.8845	6.9554	0.2701
chr15:6545852-6546345	MT2	5' exon	full	lncRNA-OET-15-401	lincRNA	0	0	0	2.5816	0.3171	0	0.1584
chr9:20367764-20368257	MT2	5' exon	full	Zfp560	protein_coding	4.3139	1.7982	2.763	3.7401	0	0	0
chr2:111281493-111281987	MT2	5' exon	full	lncRNA-OET-02-140	lincRNA	0	0.3876	0	5.8626	0.3151	0	0
chr3:157703870-157704363	MT2	5' exon	full	lncRNA-OET-03-310	lincRNA	0	0.3194	0	5.4347	0.7788	0	0.389
chr1:152483510-152484003	MT2	5' exon	full	Colgalt2	protein_coding	1.373	0.4292	0	7.7105	0.3489	0	0
chrX:17696686-17697185	MT2	5' exon	full	lncRNA-OET-0X-062	lincRNA	0	0	0.2016	3.1264	0	0.1684	0
chr14:75840465-75840957	MT2	5' exon	full	Tpt1	protein_coding	1.0081	1.2606	0	13.1099	3.0742	2.0966	0.2559
chr11:76862300-76862722	MT2	5' exon	full	lncRNA-OET-11-049	lincRNA	0.0261	0	0.0557	2.0659	0.2121	0	0.0199
chr16:18518835-18519328	MT2	5' exon	full	lncRNA-OET-16-135	lincRNA	0	0.2716	0.2318	7.7022	3.532	0	0
chr17:27281584-27282077	MT2	5' exon	full	TCONS_00045335	lincRNA	0.5411	1.3532	0.5776	4.1579	1.1	0.2411	0
chr10:61042548-61043041	MT2	5' exon	full	Gm20625	lincRNA	0	0	0	0.612	1.5787	1.538	0.1314
chr8:23369335-23369827	MT2	5' exon	full	lncRNA-OET-08-089	lincRNA	0	0	0	4.015	0	0	0
chr3:10445407-10445926	MT2	5' exon	full	lncRNA-OET-03-260	lincRNA	0	0	0	0.4058	4.5361	2.7536	0.7843
chr13:76077210-76077703	MT2	5' exon	full	Arsk	protein_coding	0	0.3471	0.5926	5.9072	0.8465	0	0.4228
chr12:118924402-118924960	MT2	5' exon	full	Abcb5	protein_coding	0.2683	0.6709	0	1.2686	2.9996	0.2391	0
chr5:139487557-139488049	MT2	5' exon	full	lncRNA-OET-05-162	lincRNA	0	0	0	5.1107	8.7886	1.1856	0.5065
chr5:94377033-94377526	MT2	5' exon	full	AA792892	protein_coding	3.8694	4.2339	5.1632	5.1465	0.9833	0	0
chr12:83630936-83631434	MT2	5' exon	full	Rbm25	protein_coding	2.1842	4.4121	4.3045	7.7468	1.5371	0	0.3839
chr6:61784741-61785286	MT2	5' exon	full	Ccser1	protein_coding	3.0013	3.7531	2.9126	4.8386	0.2774	0	0
chr11:102422957-102423527	MT2	5' exon	full	lncRNA-OET-11-004	lincRNA	0	0	0	0.132	2.4962	1.8903	0.17
chr11:59887417-59887910	MT2	5' exon	full	lncRNA-OET-11-373	lincRNA	0	0.8147	1.7386	5.3915	0.6623	0.2903	0
chr2:132645642-132646135	MT2	5' exon	full	AU019990	lincRNA	0	0	0	2.3455	1.4667	0.1608	0.1374
chr11:76868174-76868676	MT2	5' exon	full	lncRNA-OET-11-049	lincRNA	0	0	0	5.3915	0.6181	0	0
chr13:40776893-40777385	MT2	5' exon	full	lncRNA-OET-13-356	lincRNA	0	0	0	4.2799	0	0	0.5013
chr15:84752476-84752968	MT2	5' exon	full	Arhgap8	protein_coding	2.3007	0.3596	0	5.7801	1.1694	0.2563	0.4381
chrX:77803089-77803582	MT2	5' exon	full	Gm14742	lincRNA	0	0	0.3016	3.6739	0.5743	0	0.4303
chr7:127731967-127732465	MT2	5' exon	full	Ctf2	protein_coding	0.7915	1.3196	0	3.1191	0	0.2352	0
chr5:127541325-127541824	MT2	5' exon	full	Tmem132c	protein_coding	0	0	0	4.0548	0.8046	0.4703	0
chr4:53328473-53328966	MT2	5' exon	full	lncRNA-OET-04-150	lincRNA	0	0	0	4.2405	0.3646	0.3197	0
chr17:27287560-27288053	MT2	5' exon	full	TCONS_00045338	lincRNA	0	1.2097	1.0326	12.5802	0.9833	0	0
chr1:58767161-58767654	MT2	5' exon	full	lncRNA-OET-01-156	lincRNA	0	0	0	3.8908	0	0	0
chr10:117728084-117728576	MT2	5' exon	full	lncRNA-OET-10-008	lincRNA	0	0	0	6.5955	2.2054	1.6575	0.4721
chr2:69728871-69729370	MT2	5' exon	full	Ppig	protein_coding	0	0	0.3374	4.1104	8.0323	2.5355	0.9629
chr3:140760527-140761026	MT2	5' exon	full	TCONS_00068848	lincRNA	0.1625	0	0.0867	1.3445	0.1651	0	0
chr19:34154736-34155228	MT2	5' exon	full	Ankrd22	protein_coding	0	0.3876	0.9925	5.1298	0.3151	0	0
chr13:110153143-110153636	MT2	5' exon	full	lncRNA-OET-13-083	lincRNA	0	0	0	3.8908	1.3382	0	0.2506
chr4:101980859-101981352	MT2	5' exon	full	Gm12790	protein_coding	0	0	0	4.0436	0.2897	0	0.2171
chr3:157726215-157726708	MT2	5' exon	full	lncRNA-OET-03-311	lincRNA	0	0.3412	0	4.6773	1.6641	0.2432	0.2078
chr6:86491620-86492062	MT2	5' exon	full	lncRNA-OET-06-031	lincRNA	0	0	0	5.17	16.4474	6.6262	0.6661
chr11:60040026-60040494	MT2	5' exon	full	Pemt	protein_coding	0	0	0	16.2575	52.919	56.9074	6.7326
chr13:91254120-91254613	MT2	5' exon	full	lncRNA-OET-13-064	lincRNA	0	0	0	1.6268	0.1399	0.1226	0
chr5:115557047-115557494	MT2	5' exon	full	Rplp0	protein_coding	0.6651	0	0	106.932	192.674	36.7527	4.052
chr2:49179907-49180400	MT2	5' exon	full	Mbd5	protein_coding	0.2705	0.6766	0.2888	3.1984	1.65	0.2411	0.6181
chr6:61778748-61779293	MT2	5' exon	full	Ccser1	protein_coding	2.0595	2.2535	0.8244	2.1305	0	0	0
chr16:56048038-56048536	MT2	5' exon	full	Senp7	protein_coding	1.0553	0	0	6.2381	0.2682	0	0
chr13:62726496-62726989	MT2	5' exon	full	Platr25	lincRNA	0	0	0	5.9072	0.8465	0	0.2114
chr7:5696853-5697389	MT2	5' exon	full	lncRNA-OET-07-371	lincRNA	1.8241	0.7604	0	0.7189	0	0	0
chr16:19945677-19946169	MT2	5' exon	full	lncRNA-OET-16-136	lincRNA	0.2683	0.3355	0.2864	3.8058	0	0.2391	0.2043
chr5:116147049-116147541	MT2	5' exon	full	Ccdc60	protein_coding	2.6774	1.0302	0.6596	1.2174	0.2094	0.3671	0
chr5:67043547-67044038	MT2	5' exon	full	Limch1	protein_coding	0.411	0	0.2925	2.2677	0	0.1221	0.1043
chr11:109466197-109466685	MT2	5' exon	partial	Slc16a6	protein_coding	0	0.3299	0	11.5405	16.3593	3.9976	0.2009
chr11:94628824-94629316	MT2	5' exon	partial	Lrrc59	protein_coding	11.5317	12.8181	5.5492	4.5877	3.9819	4.3398	3.2621
chr1:85603757-85604244	MT2	5' exon	partial	Sp110	protein_coding	4.3102	3.7056	2.013	2.0702	2.3277	0.8404	0.4103
chr2:5924599-5925150	MT2	5' exon	partial	Dhtkd1	protein_coding	6.1069	3.4712	5.3338	21.6599	15.5197	5.1959	1.2685
chr7:103415552-103416039	MT2	5' exon	partial	Usp17lc	protein_coding	0	0	0	1.2476	0.2682	0	0.2009
chr5:103630594-103631086	MT2	5' exon	partial	Slc10a6	protein_coding	0.7981	0.998	1.0223	4.9692	0.3786	0.0948	0.0405
chr12:21741315-21741808	MT2	5' exon	partial	TCONS_00023984	lincRNA	0.1449	0.2356	0.1392	0.0514	0	0	0.011
chr10:60552555-60553053	MT2	5' exon	partial	lncRNA-OET-10-073	lincRNA	0	0	0	1.6347	0.1833	0	0.0916
chr10:83386009-83386449	MT2	5' exon	partial	TCONS_00009927	lincRNA	0.0901	0.0151	0.034	0.1819	0.0637	0.3555	0.2259
chr9:108653494-108653928	MT2	5' exon	partial	Arih2	protein_coding	0.1405	0.7908	0.875	0.3323	2.9046	3.0061	1.9621
chr13:59627984-59628104	MT2	internal exon	partial	Naa35	protein_coding	38.2139	18.3571	21.6401	6.0606	9.9483	3.9461	3.3718
chr4:112929355-112929842	MT2	internal exon	partial	lncRNA-OET-04-232	lincRNA	0	0	0.1867	0.8013	0.1111	0	0.0333
chr10:7795943-7796383	MT2	internal exon	partial	Ppil4	protein_coding	1.3748	1.2821	1.1442	0.2479	0.2842	0.1662	0.1065
chr15:90890429-90890841	MT2	tagging	partial	TCONS_00040049	lincRNA	0.2935	0.2854	0.2019	0.0848	0.0066	0	0.0099
chr10:118246325-118246657	MT2	tagging	partial	TCONS_00010641	lincRNA	0.0486	0	0.0058	0.0638	0	0	0
chr15:98889544-98890037	MT2	tagging	partial	TCONS_00040368	lincRNA	0.0417	0.0587	0.0501	0.1171	0.053	0.0465	0.0318
chr6:116691078-116691572	MT2	tagging	partial	Tmem72	protein_coding	1.3531	1.3212	1.7135	0.7151	0.0749	0.0104	0.0118
chr3:95369679-95369755	MT2	tagging	partial	TCONS_00065096	lincRNA	0	0	0	0.3625	0.0312	0	0
chr13:6957962-6958090	MT2	tagging	partial	TCONS_00028681	lincRNA	3.9654	2.8071	2.9497	3.7518	0.3301	0.0051	0.0043
chr3:95369558-95369656	MT2	tagging	partial	TCONS_00065096	lincRNA	0	0	0	0.3625	0.0312	0	0
chr17:70963412-70963657	MT2	tagging	partial	TCONS_00048837	lincRNA	3177.64	4704.3	5624.05	5223.75	5348.64	4419.22	5088.63
chr9:14419316-14419814	MT2	tagging	partial	TCONS_00105068	lincRNA	0	0	0.0332	0.8583	0.0527	0.0277	0.0316
chr5:43204745-43205073	MT2	tagging	partial	TCONS_00077310	lincRNA	0.1615	0.202	0.0862	0	0	0	0.0205
chr19:61174753-61175244	MT2	tagging	partial	Gm7102	protein_coding	0	0.0246	0.1049	6.2281	0.4396	0.2803	0.1946
chr18:32025874-32026367	MT2	tagging	partial	lncRNA-OET-18-206	lincRNA	0	0	0.3477	5.0064	0.9934	0	0
chr3:51218012-51218497	MT2	tagging	partial	TCONS_00067121	lincRNA	0.0105	0.0132	0.0337	0.0249	0.0535	0.15	0.0401
chr18:3011312-3011745	MT2	tagging	partial	lncRNA-OET-18-147	lincRNA	0	0	0	0	0	1.1535	7.8851
chr6:116685155-116685649	MT2	tagging	partial	TCONS_00088420	lincRNA	0.0157	0.0065	0.0111	0.0185	0	0	0
chr13:7633903-7634343	MT2	tagging	partial	TCONS_00028701	protein_coding	0.0018	0.0112	0.0076	0.0042	0	0	0
chr6:70783945-70784189	MT2	tagging	partial	Rpia	protein_coding	0.679	0.8038	0.8601	1.1453	1.0216	0.3066	0.6137
chr12:109757261-109757447	MT2	tagging	partial	TCONS_00023352	protein_coding	0.0605	0.1087	0.0403	0	0	0	0.0029
chr5:110737918-110737946	MT2	tagging	partial	Ep400	protein_coding	7.4486	5.9978	4.408	1.9715	0.6942	0.5804	0.5201
chr4:33628727-33629211	MT2	tagging	partial	TCONS_00069803	lincRNA	0	0.0092	0.0156	0.0779	0.0744	0.0196	0
chr13:24470942-24471060	MT2	tagging	partial	Cmah	protein_coding	0.0085	0.0106	0.0453	0.01	0	0.0038	0.0032
chr7:85880253-85880433	MT2	tagging	partial	TCONS_00091249	protein_coding	0.0024	0	0.0078	0.241	0.037	0.0022	0
chr5:137721893-137722008	MT2	tagging	partial	lncRNA-OET-05-022	lincRNA	5.4371	6.5931	5.7161	10.2752	8.0393	2.3864	0.7215
chr9:13783155-13783676	MT2A	3' exon	full	Mtmr2	protein_coding	4.2563	3.4217	5.5172	6.4698	1.5453	1.084	0.9262
chr15:76409393-76409585	MT2A	3' exon	full	Mroh1	protein_coding	0.6394	0.1142	0.1463	0.216	0.0928	0.4071	0.5565
chr3:139797768-139798230	MT2A	3' exon	full	TCONS_00068839	lincRNA	0.8048	0.5032	0.4295	1.2686	0.2727	0	0
chr6:25800254-25800523	MT2A	3' exon	full	Pot1a	protein_coding	0.194	0.5053	0.3968	0.172	0.1807	0.0432	0.0985
chr17:33329306-33329515	MT2A	3' exon	partial	Zfp81	protein_coding	0.2478	0.2846	0.1998	0.0777	0.1388	0.1533	0.1001
chr11:23092641-23093050	MT2A	3' exon	partial	TCONS_00018111	lincRNA	0.3971	0.4711	0.3478	0.0241	0.0104	0.0091	0.0853
chr17:4883284-4883481	MT2A	3' exon	partial	TCONS_00046860	lincRNA	1.1301	0.9911	1.0184	0.1215	0.0298	0.0131	0.0112
chr1:185756730-185757116	MT2A	3' exon	partial	lncRNA-OET-01-631	lincRNA	0.9144	1.5134	0.89	0.1272	0	0	0
chr1:136969912-136970058	MT2A	3' exon	partial	TCONS_00006697	lincRNA	0.1425	0	0	0	0	1.2703	1.6281
chr5:34477566-34478034	MT2A	3' exon	partial	Fam193a	protein_coding	2.0155	1.6667	1.3881	0.1922	0.0826	0.1014	0.1238
chr12:73808088-73808257	MT2A	3' exon	partial	TCONS_00022527	lincRNA	0.5798	0.5801	0.6465	0.1219	0.0065	0	0
chr16:39953578-39953866	MT2A	3' exon	partial	TCONS_00041724	lincRNA	0.1797	0.1605	0.064	0.0202	0	0	0
chr14:86148256-86148578	MT2A	3' exon	partial	TCONS_00035732	lincRNA	1.4463	2.713	1.3234	0	0	0	0
chr11:111626137-111626480	MT2A	3' exon	partial	TCONS_00020589	protein_coding	0	0	0	0	0	0	0
chr19:11667698-11667854	MT2A	3' exon	partial	Oosp1	protein_coding	155.844	135.144	102.349	18.4772	2.0281	0.0988	0
chr16:20450851-20451362	MT2A	3' exon	partial	TCONS_00043037	lincRNA	0.2715	0.1358	0.029	0.5135	2.0971	2.0808	0.8063
chr5:136076375-136076679	MT2A	3' exon	partial	Upk3bl	protein_coding	0.1009	0.3153	0.1346	0.1192	0.0256	0	0
chr4:70711586-70712008	MT2A	3' exon	partial	TCONS_00073929	lincRNA	0.0856	0.2034	0.0548	0.0101	0	0	0
chr8:69710659-69711051	MT2A	5' exon	full	Zfp869	protein_coding	8.1853	3.0707	2.6213	6.774	5.8244	3.6479	1.8702
chr8:124459610-124459876	MT2A	5' exon	full	TCONS_00101828	lincRNA	1.2123	1.1791	1.0065	0.1592	0	0	0
chr13:107061201-107061703	MT2A	5' exon	full	TCONS_00028295	lincRNA	0.2758	0.2938	0.2181	0.0362	0.0208	0	0
chr12:79009088-79009555	MT2A	5' exon	full	Tmem229b	protein_coding	0	0	0	16.7737	93.7454	6.323	0.6753
chr5:99835781-99836081	MT2A	5' exon	full	TCONS_00081887	lincRNA	0	0	0.0963	0	0	0	0
chr16:9201933-9202228	MT2A	5' exon	full	TCONS_00040902	lincRNA	0.8292	0.3456	0.7376	0	0	0	0
chr6:86307035-86307374	MT2A	5' exon	partial	TCONS_00087818	lincRNA	0.1173	0.1004	0.1648	0.0073	0.0063	0	0.0047
chr1:133928897-133929433	MT2A	5' exon	partial	Prelp	protein_coding	0.6337	1.0896	0.2537	0.0936	0	0	0
chr1:184110733-184111197	MT2A	5' exon	partial	TCONS_00003713	lincRNA	0.2235	0.163	0.1988	0	0.0189	0	0
chr8:127531158-127531655	MT2A	5' exon	partial	TCONS_00101932	lincRNA	0.0581	0.0242	0.0207	0	0	0.0863	0.1032
chr18:54220067-54220187	MT2A	5' exon	partial	TCONS_00051898	lincRNA	0.3208	0.8024	0.5137	0.1897	0	0	0
chr5:124139961-124140362	MT2A	5' exon	partial	Pitpnm2	protein_coding	0.376	0.2111	0.1311	0.1089	0.078	0	0.0117
chr4:31146632-31147051	MT2A	5' exon	partial	TCONS_00073110	lincRNA	0.0167	0.0209	0.0356	0	0	0	0
chr8:15582132-15582559	MT2A	5' exon	partial	TCONS_00096362	lincRNA	0.9041	1.3046	1.5591	0.0822	0	0.062	0
chr8:23286784-23287077	MT2A	5' exon	partial	TCONS_00096518	lincRNA	0	0	0.003	0.0469	0.0029	0.0051	0
chr5:122140691-122141127	MT2A	5' exon	partial	Ccdc63	protein_coding	0.0136	0.0509	0.0217	0.1604	0.0483	0.0121	0
chr15:97070021-97070500	MT2A	5' exon	partial	TCONS_00040269	lincRNA	0.3208	0.2006	0.2569	0.0948	0.2446	0.0715	0
chr5:140151218-140151640	MT2A	5' exon	partial	Mad1l1	protein_coding	0.0411	0.0685	0.1023	0.0324	0.0696	0.1342	0.0938
chr11:60021188-60021545	MT2A	5' exon	partial	Pemt	protein_coding	0	0	0	0	6.7139	1.717	0
chr15:81312514-81313079	MT2A	5' exon	partial	TCONS_00039761	lincRNA	0.6462	1.5354	1.7245	0.1528	0	0	0
chr12:81828920-81829045	MT2A	5' exon	partial	Pcnx	protein_coding	1.2541	1.5683	0.9736	0.1348	0	0	0
chr12:111014113-111014493	MT2A	internal exon	partial	TCONS_00023417	lincRNA	0.2827	0.0643	0.1097	0.0304	0.0261	0	0.0392
chr6:88998591-88998809	MT2A	internal exon	partial	TCONS_00085294	lincRNA	1.1401	0.7128	0.6085	0.2246	0	0	0
chr12:86568214-86568574	MT2A	internal exon	partial	TCONS_00022876	lincRNA	0.1444	0.9032	0.4626	0	0	0	0
chr10:25300953-25301249	MT2A	internal exon	partial	lncRNA-OET-10-282	lincRNA	12.2779	15.3536	6.1164	0	0	0	0
chr3:97257248-97257716	MT2A	tagging	partial	TCONS_00065252	lincRNA	0.0161	0.0201	0.0859	0.0887	0.0164	0.0191	0.0082
chr17:34461968-34462050	MT2A	tagging	partial	TCONS_00047868	lincRNA	8.2689	10.7272	10.756	1.9369	0.1358	0.0125	0
chr17:34461763-34461805	MT2A	tagging	partial	TCONS_00047868	lincRNA	8.2689	10.7272	10.756	1.9369	0.1358	0.0125	0
chr11:23090328-23090407	MT2A	tagging	partial	TCONS_00018111	lincRNA	0.3971	0.4711	0.3478	0.0241	0.0104	0.0091	0.0853
chr9:96104195-96104698	MT2A	tagging	partial	TCONS_00106894	lincRNA	0	0	0.1235	2.9172	0.4703	0.2749	0.1175
chr17:37545285-37545524	MT2A	tagging	partial	TCONS_00048080	lincRNA	0.0468	0.0219	0.0499	0	0	0	0
chr7:26665264-26665302	MT2A	tagging	partial	TCONS_00093393	lincRNA	0.4866	0.9331	0.6926	0.0384	0	0	0.0988
chr3:73637826-73638340	MT2A	tagging	partial	Bche	protein_coding	0.0302	0.0094	0.0241	0	0	0	0.0115
chr5:50357482-50357597	MT2A	tagging	partial	TCONS_00077404	lincRNA	0.0469	0.0586	0.1001	0.0139	0	0	0
chr19:53039333-53039439	MT2A	tagging	partial	Xpnpep1	protein_coding	0	0	0	0.2662	0.1335	0.3178	0.2573
chr5:50357164-50357478	MT2A	tagging	partial	TCONS_00077404	lincRNA	0.0469	0.0586	0.1001	0.0139	0	0	0
chr5:115846069-115846161	MT2A	tagging	partial	Cit	protein_coding	1.4352	1.6007	0.9937	0.5044	3.3909	0.8643	0.6499
chr14:120804786-120805021	MT2A	tagging	partial	TCONS_00036028	lincRNA	0.0247	0.0618	0.0792	0	0	0	0
chr17:15081221-15081498	MT2A	tagging	partial	TCONS_00047191	lincRNA	0	0.0357	0.0304	0.0337	0.0435	0	0
chr5:115367476-115367561	MT2A	tagging	partial	TCONS_00078911	lincRNA	0.0537	0.0723	0.0794	0.2002	0.3317	0.1546	0.0849
chr1:70785048-70785144	MT2A	tagging	partial	TCONS_00005428	lincRNA	0.372	0.504	0.3227	0.0367	0.0158	0	0
chr12:113511778-113511888	MT2A	tagging	partial	TCONS_00023519	lincRNA	0.0151	0.0189	0	0.0358	0	0	0
chr12:84026016-84026398	MT2A	tagging	partial	TCONS_00022781	protein_coding	0.0067	0.0167	0.0427	0.0079	0	0	0
chr6:79026716-79026814	MT2A	tagging	partial	TCONS_00085023	lincRNA	0.5237	0.6055	0.618	0.0622	0.0027	0	0.004
chr5:115366953-115367237	MT2A	tagging	partial	TCONS_00078911	lincRNA	0.0537	0.0723	0.0794	0.2002	0.3317	0.1546	0.0849
chr12:86577559-86577742	MT2A	tagging	partial	TCONS_00022876	lincRNA	0.0408	0.0468	0.0327	0	0	0.003	0
chr2:72457548-72457986	MT2A	tagging	partial	TCONS_00060815	lincRNA	0.6694	0.7374	0.4764	0	0	0	0
chr9:20647605-20648092	MT2A	tagging	partial	Ubl5	protein_coding	0.8491	1.1748	1.0993	0.7903	0.8172	0.3784	0.2752
chr9:111516857-111516960	MT2A	tagging	partial	TCONS_00104481	lincRNA	0.1003	0.0982	0.0652	0.0103	0	0	0.0133
chr9:20648593-20649130	MT2A	tagging	partial	Ubl5	protein_coding	0.8491	1.1748	1.0993	0.7903	0.8172	0.3784	0.2752
chr6:147202687-147202891	MT2A	tagging	partial	lncRNA-OET-06-228	lincRNA	1.1971	1.1643	0.8993	0.2271	0	0	0.0338
chr12:105901426-105901691	MT2A	tagging	partial	TCONS_00023269	lincRNA	0.6356	0.6712	0.6484	0.4342	0.0862	0.0252	0
chr13:62862146-62862547	MT2A	tagging	partial	TCONS_00027479	lincRNA	0.1995	0.294	0.1293	0.0421	0.0652	0.0571	0.0705
chr3:101313986-101314259	MT2A	tagging	partial	TCONS_00068162	lincRNA	0.1075	0.1344	0.0574	0	0	0	0
chr18:82284157-82284367	MT2A	tagging	partial	TCONS_00050819	protein_coding	0.3123	0.1597	0.3788	0.0503	0	0	0
chr12:17110633-17111071	MT2A	tagging	partial	TCONS_00021459	lincRNA	0.0317	0.0274	0.0269	0.0106	0.0008	0	0
chr4:66768089-66768315	MT2A	tagging	partial	TCONS_00070419	lincRNA	0.2675	0.4339	0.3395	0.0769	0.0073	0	0
chr8:128657448-128657761	MT2A	tagging	partial	TCONS_00098948	lincRNA	0.0365	0.0342	0.0389	0	0	0	0
chr4:49513475-49513944	MT2A	tagging	partial	Mrpl50	protein_coding	0.4832	0.8862	0.7049	0.4951	0.4257	0.7465	0.6379
chr4:143420123-143420469	MT2A	tagging	partial	Pramef8	protein_coding	4.7445	4.2505	4.0064	2.4781	0.4895	0.5554	0.4099
chr1:183412030-183412321	MT2A	tagging	partial	TCONS_00003693	lincRNA	6.8861	6.6444	3.7662	1.186	0.7778	0.1591	0.1036
chr5:115367329-115367446	MT2A	tagging	partial	TCONS_00078911	lincRNA	0.0537	0.0723	0.0794	0.2002	0.3317	0.1546	0.0849
chr17:33108506-33108679	MT2A	tagging	partial	Zfp563	protein_coding	0.4363	0.5324	0.3591	0.0497	0.0267	0.0375	0.0761
chr18:53132829-53132872	MT2A	tagging	partial	TCONS_00050250	lincRNA	0.0695	0.0773	0.0577	0	0.0039	0.0551	0.0206
chr10:62151934-62152097	MT2A	tagging	partial	TCONS_00012338	lincRNA	0	0.0896	0.0765	0	0	0	0
chr2:24939655-24940049	MT2A	tagging	partial	TCONS_00055889	lincRNA	0.0429	0.0671	0.0458	0.0444	0.0654	0.0048	0.0041
chr7:65796656-65796873	MT2A	tagging	partial	TCONS_00094279	protein_coding	0.1551	0.2493	0.1182	0.0786	0	0	0
chr11:92767124-92767559	MT2A	tagging	partial	TCONS_00019917	lincRNA	0.0671	0.084	0.0215	0.0873	0	0	0
chr3:18846513-18847001	MT2A	tagging	partial	TCONS_00066563	lincRNA	0.0728	0.0506	0.0432	0.0287	0.0247	0	0
chr15:66874672-66874932	MT2A	tagging	partial	TCONS_00039356	lincRNA	0.2229	0.262	0.2236	0.0316	0.0045	0	0
chr3:94448863-94448923	MT2A	tagging	partial	Mrpl9	protein_coding	3.9186	4.2558	2.7507	0.6093	1.0379	0.8407	0.5036
chr8:23520254-23520495	MT2A	tagging	partial	TCONS_00099567	lincRNA	0.0287	0.0179	0.0612	0.0169	0	0	0
chr6:34765740-34765939	MT2A	tagging	partial	Cald1	protein_coding	0	0.0101	0	0	0	0	0.0245
chr2:144409003-144409184	MT2A	tagging	partial	Csrp2bp	protein_coding	7.7351	7.8043	6.4946	0.8296	0.8308	0.2722	0.2641
chr2:45733588-45733776	MT2A	tagging	partial	Gm13465	lincRNA	2.1533	2.1542	2.1262	0.3819	0	0	0
chr16:84856152-84856196	MT2A	tagging	partial	Gabpa	protein_coding	0.1341	0.0839	0	2.22	1.4998	1.7933	1.4301
chr17:15319196-15319541	MT2A	tagging	partial	TCONS_00047203	lincRNA	0.0257	0.0321	0.0165	0	0	0	0
chr12:105585209-105585555	MT2A	tagging	partial	TCONS_00025612	lincRNA	0.2705	0.6766	0.8303	0	0.0688	0	0
chr4:32047025-32047331	MT2A	tagging	partial	CUFF.31645.1	lincRNA	0.3107	0.5181	0.2843	0.0875	0	0	0
chr7:80242229-80242269	MT2A	tagging	partial	TCONS_00091092	protein_coding	0.9531	1.1624	0.3768	0.2226	0.1675	0.1101	0.1255
chr19:9866089-9866193	MT2A	tagging	partial	TCONS_00052831	lincRNA	1.2437	10.8871	5.3992	0.9803	1.4329	0	0.1894
chrX:132049486-132049864	MT2A	tagging	partial	TCONS_00112854	lincRNA	0.3452	0.1818	0.1358	0	0.0185	0	0
chr7:27970934-27971182	MT2A	tagging	partial	Zfp780b	protein_coding	0.0106	0	0.0113	0.0376	0	0.1985	0.0969
chr14:24561689-24562197	MT2A	tagging	partial	TCONS_00031825	lincRNA	0.3242	0.3589	0.3641	0.0399	0.0034	0	0
chr7:65796190-65796257	MT2A	tagging	partial	TCONS_00094279	protein_coding	0.1551	0.2493	0.1182	0.0786	0	0	0
chr11:29512312-29512588	MT2A	tagging	partial	Prorsd1	protein_coding	0.2161	0.2911	0.1952	0.1769	0.1859	0.2519	0.2279
chr13:99543303-99543817	MT2A	tagging	partial	TCONS_00031028	lincRNA	0.5126	0.3876	0.4963	0.1691	0.0364	0.0106	0
chr8:48155550-48155633	MT2A	tagging	partial	TCONS_00097156	lincRNA	0.0229	0.043	0.0245	0.1219	0	0.0306	0.0174
chr13:52911997-52912072	MT2A	tagging	partial	Auh	protein_coding	1.332	1.3017	1.147	0.1456	0.0569	0.0299	0.0682
chr17:15319014-15319172	MT2A	tagging	partial	TCONS_00047203	lincRNA	0.0257	0.0321	0.0165	0	0	0	0
chr18:82284571-82284847	MT2A	tagging	partial	TCONS_00050819	protein_coding	0.3123	0.1597	0.3788	0.0503	0	0	0
chr8:23286672-23286795	MT2A	tagging	partial	TCONS_00096518	lincRNA	0	0	0.003	0.0469	0.0029	0.0051	0
chr8:13148791-13149228	MT2A	tagging	partial	Cul4a	protein_coding	0.7164	0.4063	0.2223	0.0886	0.2625	0.2302	0.3172
chr6:65646969-65647370	MT2A	tagging	partial	TCONS_00084849	lincRNA	0.2181	0.3986	0.3402	0.0496	0	0	0
chr14:74526123-74526430	MT2A	tagging	partial	TCONS_00035508	lincRNA	0.0809	0.059	0.036	0.0439	0.0034	0	0
chr6:147202944-147202964	MT2A	tagging	partial	lncRNA-OET-06-228	lincRNA	1.1971	1.1643	0.8993	0.2271	0	0	0.0338
chr8:105973919-105973976	MT2A	tagging	partial	TCONS_00098192	lincRNA	3.3415	3.4078	2.632	3.3752	1.3851	0.5205	0.173
chr8:105974248-105974668	MT2A	tagging	partial	TCONS_00098192	lincRNA	3.3415	3.4078	2.632	3.3752	1.3851	0.5205	0.173
chr8:115815747-115815992	MT2A	tagging	partial	TCONS_00101557	lincRNA	0.0081	0.0508	0.0174	0	0	0	0
chr13:63460208-63460647	MT2A	tagging	partial	TCONS_00030223	lincRNA	0.01	0.0251	0.0322	0.0059	0.0102	0.0045	0
chr2:144408708-144408865	MT2A	tagging	partial	TCONS_00062217	lincRNA	0.2095	0.2619	0.1342	0.0495	0.0426	0	0.1595
chr3:96242895-96243008	MT2A	tagging	partial	TCONS_00068005	lincRNA	3.3322	2.507	2.1015	2.4876	0.1928	0.2817	0.4883
chr3:132681077-132681455	MT2A	tagging	partial	Aimp1	protein_coding	0.0161	0.0706	0.0258	0.0191	0.1394	0.1222	0.1658
chr17:37533093-37533454	MT2A	tagging	partial	TCONS_00045830	protein_coding	0.0529	0.0441	0.0565	0.0104	0	0	0
chr8:27055574-27056046	MT2A	tagging	partial	Prosc	protein_coding	0.415	0.4488	0.1916	2.4665	4.1276	1.0998	0.3075
chr14:114079430-114079817	MT2A	tagging	partial	TCONS_00035962	lincRNA	0.0118	0.0074	0.0314	0	0	0	0
chr1:40869730-40869799	MT2A	tagging	partial	TCONS_00000807	lincRNA	0.0148	0.0259	0.0221	0.0035	0	0.0026	0
chr10:41915685-41915718	MT2A	tagging	partial	Armc2	protein_coding	0.5297	0.4654	0.5196	0.1185	0.0291	0	0
chr9:32134456-32134801	MT2A	tagging	partial	TCONS_00105563	lincRNA	0.0979	0.1224	0.0522	0	0.0332	0.0582	0.0745
chr3:94448958-94448986	MT2A	tagging	partial	Mrpl9	protein_coding	3.9186	4.2558	2.7507	0.6093	1.0379	0.8407	0.5036
chr11:23089918-23090289	MT2A	tagging	partial	TCONS_00018111	lincRNA	0.3971	0.4711	0.3478	0.0241	0.0104	0.0091	0.0853
chr2:150243478-150243848	MT2A	tagging	partial	Zfp937	protein_coding	0.2102	0.269	0.1566	0.0058	0.0298	0.0479	0.0484
chr6:48132361-48132418	MT2A	tagging	partial	Gm16630	lincRNA	0.1838	0.1217	0.1731	0.0128	0	0	0
chr1:42746085-42746527	MT2A	tagging	partial	TCONS_00000835	lincRNA	0.0233	0.035	0.0398	0.0055	0	0	0
chr13:54459017-54459577	MT2A	tagging	partial	Thoc3	protein_coding	4.7622	4.7014	4.4998	4.391	4.4472	2.031	1.5618
chr8:120656123-120656498	MT2A	tagging	partial	Emc8	protein_coding	6.6872	6.8974	4.1014	1.5334	0.5529	0.3294	0.324
chr5:73948764-73949230	MT2A	tagging	partial	TCONS_00077714	lincRNA	0.0626	0.1304	0.0445	0.074	0.4239	0.3345	0.2223
chrX:74409317-74409407	MT2A	tagging	partial	G6pdx	protein_coding	11.3194	13.7982	11.7705	0.9572	0.3135	0.0481	0.1057
chr4:116031985-116032528	MT2A	tagging	partial	Nsun4	protein_coding	10.9623	13.3117	12.5012	1.86	0.258	0.0565	0.0773
chr5:43228991-43229511	MT2A	tagging	partial	TCONS_00077312	lincRNA	0.0183	0.0344	0.0196	0.0433	0	0.0082	0.0279
chr1:70784428-70784861	MT2A	tagging	partial	TCONS_00005428	lincRNA	0.372	0.504	0.3227	0.0367	0.0158	0	0
chr9:86223113-86223252	MT2A	tagging	partial	TCONS_00103826	lincRNA	0.1792	0.181	0.2723	0.0733	0	0	0
chr5:140636148-140636322	MT2A	tagging	partial	Ttyh3	protein_coding	8.6096	9.5779	2.7453	1.5202	0.2842	0	0.0426
chr3:82761428-82761446	MT2A	tagging	partial	Gm30043	lincRNA	0.7334	0.5792	0.4395	0.0304	0.0654	0.0115	0
chr4:33707061-33707239	MT2A	tagging	partial	TCONS_00073209	lincRNA	0.0493	0.019	0.0284	0.0045	0	0	0
chr3:39782400-39782573	MT2A	tagging	partial	TCONS_00066979	protein_coding	0.0268	0.0154	0.0176	0.0024	0.0021	0	0
chr1:24815833-24816253	MT2A	tagging	partial	TCONS_00004437	lincRNA	0.1709	0.1527	0.189	0.0433	0.0062	0	0
chr3:101314828-101314999	MT2A	tagging	partial	TCONS_00068162	lincRNA	0.1075	0.1344	0.0574	0	0	0	0
chr14:114079340-114079379	MT2A	tagging	partial	TCONS_00035962	lincRNA	0.0118	0.0074	0.0314	0	0	0	0
chr10:41915124-41915595	MT2A	tagging	partial	Armc2	protein_coding	0.5297	0.4654	0.5196	0.1185	0.0291	0	0
chr6:113721609-113722054	MT2A	tagging	partial	Tatdn2	protein_coding	0.0714	0.0595	0.0805	0.2674	0.3348	0.1503	0.2403
chr18:35262512-35262774	MT2A	tagging	partial	Sil1	protein_coding	0.6738	0.5765	0.3123	0.0157	0.0946	0.0474	0.0743
chr8:44778218-44778579	MT2A	tagging	partial	TCONS_00100172	lincRNA	0.0356	0.049	0.0608	0.0042	0	0	0
chr6:120520247-120520474	MT2A	tagging	partial	Cecr5	protein_coding	0.0474	0.1186	0.1519	0.1402	0.0482	0.1057	0.0542
chr15:76409320-76409360	MT2A	tagging	partial	Mroh1	protein_coding	0.6394	0.1142	0.1463	0.216	0.0928	0.4071	0.5565
chr8:23520571-23520736	MT2A	tagging	partial	TCONS_00099567	lincRNA	0.0287	0.0179	0.0612	0.0169	0	0	0
chr13:63460720-63460753	MT2A	tagging	partial	TCONS_00030223	lincRNA	0.01	0.0251	0.0322	0.0059	0.0102	0.0045	0
chr6:115550626-115551064	MT2A	tagging	partial	Tsen2	protein_coding	0.007	0.0264	0.015	0.0998	0.2144	0.1065	0.1178
chr6:48132086-48132178	MT2A	tagging	partial	Gm16630	lincRNA	0.1838	0.1217	0.1731	0.0128	0	0	0
chr5:48394070-48394399	MT2A	tagging	partial	Pacrgl	protein_coding	0.0532	0.0148	0.0441	0.0768	0.1501	0.1053	0.0855
chrX:5431647-5431851	MT2A	tagging	partial	TCONS_00107852	lincRNA	0.2417	0.3303	0.258	0.0266	0	0	0
chrX:5431302-5431452	MT2A	tagging	partial	TCONS_00107852	lincRNA	0.2417	0.3303	0.258	0.0266	0	0	0
chr7:65796251-65796432	MT2A	tagging	partial	TCONS_00094279	protein_coding	0.1551	0.2493	0.1182	0.0786	0	0	0
chr12:33327353-33327627	MT2A	tagging	partial	Atxn7l1	protein_coding	0.0652	0.0136	0.058	0.0128	0.011	0.0194	0.091
chr1:172137950-172138233	MT2A	tagging	partial	Pex19	protein_coding	1.3602	1.4733	1.3171	0.6755	1.0589	0.2659	0.3736
chr8:23521308-23521359	MT2A	tagging	partial	TCONS_00099567	lincRNA	0.0287	0.0179	0.0612	0.0169	0	0	0
chr8:69666421-69666636	MT2A	tagging	partial	Zfp964	protein_coding	0.77	0.7818	0.472	0.2704	0.0155	0.0204	0.0174
chr2:144281683-144281926	MT2A	tagging	partial	TCONS_00062208	lincRNA	0.0781	0.0488	0	0	0	0.0348	0
chr15:84918902-84919159	MT2A	tagging	partial	Gm29666	protein_coding	0	0	0.0411	0.0546	0.0705	0.0618	0.1173
chr12:32875001-32875112	MT2A	tagging	partial	TCONS_00024324	lincRNA	0.6572	0.7045	0.5011	0	0	0	0
chr8:78915127-78915308	MT2A	tagging	partial	TCONS_00100714	lincRNA	0.2071	0.518	0.3158	0	0	0	0
chr19:14394466-14394510	MT2A	tagging	partial	TCONS_00054486	lincRNA	0.3242	0.1532	0.2692	0.1448	0	0	0
chr4:131731131-131731369	MT2A	tagging	partial	TCONS_00075236	lincRNA	0.0388	0.1943	0.1866	0	0	0	0
chr7:80242089-80242229	MT2A	tagging	partial	TCONS_00091092	protein_coding	0.9531	1.1624	0.3768	0.2226	0.1675	0.1101	0.1255
chr15:84919200-84919374	MT2A	tagging	partial	Gm29666	protein_coding	0	0	0.0411	0.0546	0.0705	0.0618	0.1173
chr8:124761336-124761662	MT2A	tagging	partial	TCONS_00098829	lincRNA	0.1475	0.2221	0.1735	0.2847	0.0122	0.0027	0
chr6:35996859-35997372	MT2A	tagging	partial	TCONS_00084209	lincRNA	0.354	0.2604	0.2445	0.0985	0	0	0
chr7:132053704-132054050	MT2A	tagging	partial	Cpxm2	protein_coding	2.3452	3.7362	3.4866	0.3925	0.0327	0.0095	0.0245
chr9:86545857-86546036	MT2A	tagging	partial	Dopey1	protein_coding	2.6304	1.5329	0.627	0.3019	0.0779	0.1821	0.0583
chr7:132054099-132054142	MT2A	tagging	partial	Cpxm2	protein_coding	2.3452	3.7362	3.4866	0.3925	0.0327	0.0095	0.0245
chr8:9968976-9969349	MT2A	tagging	partial	TCONS_00099183	protein_coding	3.1968	2.7733	2.0125	0.4038	0.162	0.1055	0.0694
chr2:13880145-13880521	MT2A	tagging	partial	TCONS_00059571	lincRNA	0.0653	0	0.0348	0	0	0	0
chr13:67487295-67487758	MT2A	tagging	partial	Zfp58	protein_coding	4.1978	5.825	5.0178	0.1217	0.0369	0.0594	0.0646
chr6:66546005-66546447	MT2A	tagging	partial	Mad2l1	protein_coding	2.0151	2.116	2.2936	0.7636	0.7922	0.3799	0.2919
chr3:82761039-82761391	MT2A	tagging	partial	Gm30043	lincRNA	0.7334	0.5792	0.4395	0.0304	0.0654	0.0115	0
chr11:60002525-60002773	MT2A	tagging	partial	TCONS_00015507	protein_coding	0.1694	0.339	0.1447	0.3205	1.4124	0.7853	0.1549
chr7:51857985-51858200	MT2A	tagging	partial	TCONS_00094148	protein_coding	0.0244	0.0183	0.0208	0.2882	0.114	0.0304	0.0446
chr5:30789268-30789344	MT2A	tagging	partial	TCONS_00080612	lincRNA	0.0624	0.0638	0.0848	0.0335	0.0058	0	0
chr13:51639067-51639187	MT2A	tagging	partial	TCONS_00029791	lincRNA	0	0.012	0.0308	0.0114	0	0	0.022
chr14:75558647-75558722	MT2A	tagging	partial	TCONS_00033256	lincRNA	0.0526	0.0614	0.0637	0.0083	0.0071	0.0031	0
chr2:98095537-98095746	MT2A	tagging	partial	TCONS_00057229	lincRNA	0.0318	0	0.0339	0.0751	0	0	0
chr8:33047623-33048127	MT2B	3' exon	full	TCONS_00096776	lincRNA	4.9365	13.1693	11.5932	0.3891	0	0	0
chr8:57509941-57510300	MT2B	3' exon	full	lncRNA-OET-08-006	lincRNA	6.8891	14.8029	9.2184	1.606	0.0986	0.3459	1.3302
chr1:71985578-71986066	MT2B	3' exon	full	4933417E11Rik	lincRNA	0.1657	0.6216	0.2948	0	0	0	0
chr1:40276850-40277403	MT2B	3' exon	full	Il1r1	protein_coding	6.5365	4.182	4.3813	0.5392	0	0	0
chr4:133215373-133215885	MT2B	3' exon	full	Gpr3	protein_coding	11.3833	13.9254	15.0572	15.5059	11.3199	0	0
chrX:119749062-119749495	MT2B	3' exon	partial	Gm14929	lincRNA	0	0	0	0.261	0.0374	0	0.014
chr2:35147576-35147693	MT2B	3' exon	partial	Cntrl	protein_coding	0.9496	0.5481	0.5459	0.0864	0.0743	0	0.2225
chr8:128710625-128710742	MT2B	3' exon	partial	Itgb1	protein_coding	6.3376	4.1093	2.4221	0.925	1.2726	2.5804	2.6815
chr17:23609241-23609287	MT2B	3' exon	partial	Zscan10	protein_coding	0.6666	0.741	0.6325	0.2627	0.3012	0.066	0.2256
chr2:168799639-168799807	MT2B	3' exon	partial	TCONS_00058842	lincRNA	0.123	0.2307	0	0.8726	0.8128	0.1645	0.0468
chr5:31143933-31144084	MT2B	3' exon	partial	Gtf3c2	protein_coding	0	0.0588	0.1506	0.2779	0.5257	0.4191	0.5371
chr3:94487492-94487587	MT2B	3' exon	partial	Celf3	protein_coding	0.4413	0.6439	0.5496	0.1739	0	0.0656	0.1681
chr15:98187889-98188461	MT2B	3' exon	partial	Olfr287	protein_coding	1.1823	1.0678	0.7713	0	0	0	0
chr14:77793581-77793680	MT2B	3' exon	partial	Gm1587	protein_coding	1.8625	2.7124	2.0386	0.446	0	0	0
chr12:64541599-64542211	MT2B	3' exon	partial	TCONS_00022358	lincRNA	0	0	0.2078	0	0	0	0
chr19:44436370-44436483	MT2B	3' exon	partial	TCONS_00053594	lincRNA	0.3225	0.8569	0.2582	0	0	0	0
chr1:163673881-163674112	MT2B	3' exon	partial	TCONS_00007271	lincRNA	0.0152	0.0095	0.0324	0.0179	0.0077	0	0
chr12:55115121-55115527	MT2B	3' exon	partial	Srp54a	protein_coding	1.7652	1.4457	0.9156	0.3233	0.0885	0.133	0.0757
chr2:32237645-32238198	MT2B	3' exon	partial	Pomt1	protein_coding	1.5914	0.4683	0.4997	0.1107	0	0	0.6417
chr10:128445392-128445758	MT2B	3' exon	partial	Rnf41	protein_coding	0.0597	0.0249	0	0.4002	0.3644	0.0533	0.091
chr4:90354382-90354629	MT2B	3' exon	partial	TCONS_00074244	protein_coding	1.1306	1.4023	1.2559	0.0869	0.0187	0.0041	0
chr13:97348226-97348278	MT2B	3' exon	partial	TCONS_00030963	lincRNA	0.04	0.0285	0.0366	0.0067	0.0058	0.0051	0.0087
chr7:119771955-119772445	MT2B	3' exon	partial	TCONS_00095283	lincRNA	0.0512	0.096	0.0683	0.0454	0.052	0.0228	0.0292
chr8:36419377-36419887	MT2B	3' exon	partial	TCONS_00096868	lincRNA	0.2131	0.3258	0.3034	0.056	0	0	0
chr2:72458045-72458468	MT2B	3' exon	partial	TCONS_00060815	lincRNA	0.6694	0.7374	0.4764	0	0	0	0
chr19:23923342-23923389	MT2B	3' exon	partial	Apba1	protein_coding	3.865	3.7445	1.9151	0.9981	0.1073	0	0.0301
chr17:25987344-25987454	MT2B	3' exon	partial	Rab11fip3	protein_coding	0.7594	0.6485	0.4449	0.3832	0.2165	0.3962	0.2328
chr7:134385451-134385931	MT2B	5' exon	full	D7Ertd443e	protein_coding	0	0.3095	0.2642	8.7769	9.0559	0.2206	0
chr4:120831360-120831940	MT2B	5' exon	full	Nfyc	protein_coding	6.3845	9.1501	9.8019	1.4418	3.2815	1.4706	0.8195
chr13:59965996-59966404	MT2B	5' exon	full	TCONS_00027400	lincRNA	0.2379	0.3967	0.6773	0	0	0	0
chr2:11603906-11604446	MT2B	5' exon	full	Rbm17	protein_coding	0	0	0	2.295	8.3318	0	0
chr7:26527806-26528060	MT2B	5' exon	full	TCONS_00093385	lincRNA	0.2073	1.0369	0.6638	0.2451	0	0	0
chr19:29261057-29261171	MT2B	5' exon	full	Jak2	protein_coding	1.3879	0	0	0	0	0	0
chr13:68041089-68041617	MT2B	5' exon	full	lncRNA-OET-13-046	lincRNA	0	0	0	3.5789	0	0	0
chr15:63844940-63845520	MT2B	5' exon	full	Gsdmc2	protein_coding	6.0653	4.7903	5.7931	1.5096	0	0	0
chr3:32512147-32512268	MT2B	5' exon	full	Zfp639	protein_coding	0.2516	0.472	0.235	1.7848	0.4796	0.1962	0.1437
chr15:63912061-63912636	MT2B	5' exon	full	Gsdmc4	protein_coding	0.9772	0.4073	0.6954	1.1553	0	0.2903	0
chr2:132587540-132588045	MT2B	5' exon	full	Gpcpd1	protein_coding	0	0	0.3126	1.0387	3.2748	0.5221	1.5613
chr3:93068549-93069072	MT2B	5' exon	full	Gm4858	protein_coding	0	0	0	3.7122	2.3939	0	0.1993
chr13:119950602-119950913	MT2B	5' exon	full	B020031M17Rik	protein_coding	0	0	0	12.8522	0.1754	0.3076	0.2628
chr13:95323364-95323854	MT2B	5' exon	full	TCONS_00028035	protein_coding	201.018	170.831	194.372	21.8304	0.859	0.0837	0
chr4:11898330-11898813	MT2B	5' exon	full	TCONS_00072828	lincRNA	2.1002	2.101	0.8968	0.4966	0	0	0
chr4:90364629-90365117	MT2B	5' exon	full	TCONS_00074244	protein_coding	2.1164	2.5363	3.0123	0.2085	0	0	0
chr13:119830003-119830354	MT2B	5' exon	full	TCONS_00031445	protein_coding	0.347	1.5187	0.1852	39.7918	5.8199	0.7732	0
chr1:6205919-6206376	MT2B	5' exon	full	Rb1cc1	protein_coding	0	0	0	8.6702	28.9422	0	0
chr13:63406022-63406500	MT2B	5' exon	full	Fancc	protein_coding	0	1.3902	1.1868	0	0	0	0.2419
chr13:119845235-119845554	MT2B	5' exon	full	TCONS_00028552	protein_coding	0.1889	0.2362	0.1008	17.4188	0.48	0.0842	0.0719
chr4:90218706-90219073	MT2B	5' exon	full	Zfp352	protein_coding	0	0	0.4369	5.8063	0.208	0	0.1558
chr13:120153783-120154099	MT2B	5' exon	full	Gm20767	protein_coding	0	0.0777	0	2.423	0.1894	0	0.0473
chr7:122965216-122965876	MT2B	5' exon	full	Rbbp6	protein_coding	0	0	0	7.8861	0.4843	0	0
chr3:93676066-93676577	MT2B	5' exon	full	Tdpoz1	protein_coding	0	0	0	4.8803	1.6785	1.2265	0
chr3:94178057-94178347	MT2B	5' exon	full	Gm10696	protein_coding	0	0	0	4.0216	1.0639	0	0.3986
chr3:94054641-94055151	MT2B	5' exon	full	Gm9125	protein_coding	0	0	0	3.9042	0	0	0
chr5:106774073-106774505	MT2B	5' exon	full	TCONS_00078523	lincRNA	0.4968	1.398	0.2652	0.1469	0	0	0
chr14:122161828-122162354	MT2B	5' exon	full	TCONS_00033879	lincRNA	0.1339	0.0558	0.0477	0.0792	0.0454	0.0398	0.017
chr17:36272020-36272580	MT2B	5' exon	full	Trim39	protein_coding	0.6579	0.8995	0.59	0.7156	2.0599	1.3449	0.5478
chr7:21190182-21190760	MT2B	5' exon	full	Gm5157	protein_coding	0.1995	0	0	10.1428	0.6084	0.1778	0.3039
chr3:121252604-121253204	MT2B	5' exon	full	Tmem56	protein_coding	0	0	0	2.3193	4.3509	0.4769	0.1358
chr6:54959355-54959936	MT2B	5' exon	full	lncRNA-OET-06-338	lincRNA	0	0	0	3.4572	4.2111	0	0
chr13:59767759-59768288	MT2B	5' exon	full	Isca1	protein_coding	0.4788	1.7964	1.5335	0.1887	0	0	0.3647
chrX:111556528-111557107	MT2B	5' exon	full	Rps6ka6	protein_coding	1.0805	1.8424	2.2019	1.858	0.0998	0	0
chr7:20730395-20730960	MT2B	5' exon	full	Gm10668	protein_coding	0.4093	0.7677	0.6553	7.9836	0.416	0	0.3117
chr18:84934683-84935260	MT2B	5' exon	full	Fbxo15	protein_coding	0	0	0	321.616	1087.79	600.002	160.672
chr2:167489098-167489613	MT2B	5' exon	full	Spata2	protein_coding	0.7981	1.5968	0.8519	5.4724	0.4868	0.1423	0.1216
chr4:119536941-119537234	MT2B	5' exon	full	Foxj3	protein_coding	0.3869	2.1774	1.8587	1.6011	0.1967	0	0
chr7:22719481-22720046	MT2B	5' exon	full	Gm4567	protein_coding	1.3966	0.2495	0.8519	4.4817	0	0.1778	0
chr7:23278671-23279237	MT2B	5' exon	full	Gm6902	protein_coding	0.1995	0.7485	1.0649	7.784	0.2028	0.3557	0
chr5:100122557-100123124	MT2B	5' exon	full	Tmem150c	protein_coding	0	0	0	2.7956	2.2034	0.3513	0
chr16:19098887-19099458	MT2B	5' exon	full	TCONS_00043014	lincRNA	0.2194	0.9603	1.2881	0.2594	0	0	0
chr5:124362873-124363472	MT2B	5' exon	full	Cdk2ap1	protein_coding	0	0	0	28.944	69.5364	18.8265	1.0968
chr14:23732720-23733244	MT2B	5' exon	full	Kcnma1	protein_coding	1.4068	1.0826	0.231	0.2559	0	0	0
chr6:24821243-24821486	MT2B	5' exon	full	Hyal5	protein_coding	0.4729	0.2957	0.2524	0.5591	0	0	0
chr13:119894603-119894925	MT2B	5' exon	full	Tcstv1	protein_coding	1.4572	2.2921	0.9844	0.9153	0.081	0.0609	0.0607
chr13:120316722-120317087	MT2B	5' exon	full	Tcstv3	protein_coding	1.3879	3.9671	1.9049	7.0324	0	0.3535	0
chr7:123228506-123229071	MT2B	5' exon	partial	Slc5a11	protein_coding	0	0	0	0.6989	1.2019	9.748	4.7274
chr1:162730707-162730860	MT2B	5' exon	partial	Prrc2c	protein_coding	0.0152	0.019	0.0648	0.1076	0.1079	0.2028	0.0346
chr10:80416076-80416340	MT2B	5' exon	partial	Tcf3	protein_coding	2.9287	2.0143	1.0942	2.5103	1.8607	0.4568	0.223
chr17:35958438-35958547	MT2B	5' exon	partial	Abcf1	protein_coding	5.8602	5.5926	4.7741	7.931	13.6385	4.3986	3.2299
chr8:57488866-57489021	MT2B	5' exon	partial	Sap30	protein_coding	0.9253	0.45	0.2195	0.4862	0.0523	0	0
chr2:152421434-152421689	MT2B	5' exon	partial	CUFF.27565.1	lincRNA	0.1664	0.1408	0.1149	0.0289	0.01	0.0175	0.0075
chr6:37876462-37876481	MT2B	5' exon	partial	Trim24	protein_coding	0	0	0.2417	1.0707	2.7617	0.6054	1.5518
chr7:80997366-80997478	MT2B	5' exon	partial	Zfp592	protein_coding	2.9642	3.1365	3.1643	0.5392	0	0	0.3473
chr9:108359827-108359949	MT2B	5' exon	partial	Usp4	protein_coding	7.6851	7.4981	4.5075	1.5975	1.116	1.2797	1.9295
chr8:71880427-71880960	MT2B	5' exon	partial	TCONS_00100623	lincRNA	0	0.1353	0.231	0.7676	0.11	0.0965	0
chr10:75947497-75948085	MT2B	5' exon	partial	TCONS_00012655	lincRNA	0.021	0	0.0449	0.2485	0.0427	0	0
chr13:103457583-103457692	MT2B	5' exon	partial	TCONS_00028236	lincRNA	0.2179	0	0.0582	0	0	0	0
chr1:84866514-84866754	MT2B	5' exon	partial	Fbxo36	protein_coding	0	0.184	0.0785	0	0	0.0656	0.112
chr3:96655989-96656123	MT2B	5' exon	partial	Itga10	protein_coding	0	0.8248	0.8449	0	0.1341	0.1176	0
chr18:38298309-38298433	MT2B	5' exon	partial	Rnf14	protein_coding	4.9112	0.6141	4.1941	4.645	2.7458	1.0944	1.4961
chr2:157003213-157003339	MT2B	5' exon	partial	Dsn1	protein_coding	10.3973	6.255	5.8795	1.9269	2.2852	1.1522	0.2996
chr8:119943971-119944120	MT2B	5' exon	partial	Usp10	protein_coding	0	0	0	2.2332	1.5361	1.1786	0.5754
chr19:31055499-31055844	MT2B	5' exon	partial	TCONS_00053255	lincRNA	0.0583	0.0365	0.0156	0.0862	0.0296	0.013	0.0111
chr10:69182771-69183395	MT2B	5' exon	partial	Rhobtb1	protein_coding	0.7199	0.616	0.5663	0.0224	0.1156	0	0
chr6:87006389-87006957	MT2B	5' exon	partial	TCONS_00085243	lincRNA	0.0382	0	0.0408	0.0451	0.1553	0	0.0291
chr4:117121797-117121979	MT2B	5' exon	partial	Btbd19	protein_coding	0.0556	0	0.089	0.2956	0.3107	0.3962	0.1058
chr11:116842237-116842354	MT2B	5' exon	partial	Jmjd6	protein_coding	18.6284	16.9324	9.1105	18.7248	6.5067	3.9499	1.5
chr2:35423158-35423548	MT2B	5' exon	partial	Ggta1	protein_coding	42.5635	39.9194	19.1683	5.897	1.6901	0.8892	8.1041
chr10:109230134-109230646	MT2B	5' exon	partial	TCONS_00010391	lincRNA	0.072	0	0.1921	0.0425	0	0	0
chr3:96629117-96629395	MT2B	5' exon	partial	Rbm8a	protein_coding	0.18	0.2251	0.0641	1.7026	0.122	0	0.0457
chr11:94842429-94842571	MT2B	5' exon	partial	TCONS_00020020	lincRNA	1.1953	0.7034	0.6755	0.1663	0	0	0
chr3:96628795-96628981	MT2B	5' exon	partial	Rbm8a	protein_coding	0.18	0.2251	0.0641	1.7026	0.122	0	0.0457
chr13:119913775-119913954	MT2B	5' exon	partial	TCONS_00031455	protein_coding	0.0682	0.1706	0	3.1451	0	0	0
chr1:37843380-37843859	MT2B	5' exon	partial	Tsga10	protein_coding	0.2768	0.2203	0.1478	0.0298	0.0384	0.0224	0.0767
chr14:40922300-40922517	MT2B	5' exon	partial	Tspan14	protein_coding	1.4577	2.1874	0.9336	0.3447	0	0	0.111
chr13:120262958-120263274	MT2B	5' exon	partial	AF067061	protein_coding	0.0816	0.102	0	2.0574	0.0553	0.0727	0.1243
chr15:100434154-100434579	MT2B	5' exon	partial	TCONS_00040448	lincRNA	0.0212	0	0.0452	0	0.0215	0	0
chr5:53624326-53624722	MT2B	5' exon	partial	Rbpj	protein_coding	2.2827	3.0707	2.6582	0.8587	0.2461	0.5241	0.3424
chr5:26683463-26683902	MT2B	5' exon	partial	TCONS_00076786	lincRNA	0	0	0.0704	0.039	0	0	0
chr6:122263222-122263518	MT2B	5' exon	partial	TCONS_00088549	lincRNA	0.1292	0.4849	0.2759	0	0	0	0
chr13:120172300-120172620	MT2B	5' exon	partial	TCONS_00028585	protein_coding	0.2354	0.5152	0.1466	0.6263	0.0199	0	0
chr10:21978891-21979062	MT2B	5' exon	partial	Sgk1	protein_coding	0	0	0	0	1.0434	2.1958	1.4853
chr13:119913286-119913604	MT2B	5' exon	partial	TCONS_00031455	protein_coding	0.0682	0.1706	0	3.1451	0	0	0
chr14:40922034-40922279	MT2B	5' exon	partial	Tspan14	protein_coding	1.4577	2.1874	0.9336	0.3447	0	0	0.111
chr13:120153433-120153612	MT2B	5' exon	partial	Gm20767	protein_coding	0	0.0777	0	2.423	0.1894	0	0.0473
chr13:98708769-98708864	MT2B	5' exon	partial	TCONS_00028136	lincRNA	0.3607	0.4511	0.1925	0	0	0	0
chr18:68365328-68365513	MT2B	5' exon	partial	TCONS_00050574	lincRNA	0.4454	0.1857	0	0.3511	0	0	0
chr4:144389421-144390068	MT2B	5' exon	partial	Gm13125	protein_coding	1.303	1.3578	1.3909	0	0	0	0
chr13:65058343-65058918	MT2B	5' exon	partial	TCONS_00027525	lincRNA	0.0397	0.0695	0.0593	0	0.0081	0.0071	0.0242
chrX:7703581-7703733	MT2B	5' exon	partial	Gpkow	protein_coding	0.8082	1.5159	1.2941	5.7328	7.8045	3.9619	4.0008
chr7:141400096-141400183	MT2B	5' exon	partial	Taldo1	protein_coding	6.3605	3.9019	0.8968	4.2565	6.9536	9.1993	6.855
chr7:123232598-123233196	MT2B	internal exon	partial	Slc5a11	protein_coding	0	0	0	0.9677	3.0509	16.294	8.5197
chr1:75184376-75184458	MT2B	internal exon	partial	Atg9a	protein_coding	17.0434	9.4724	8.9524	19.51	53.6255	24.8367	5.563
chr16:38417056-38417131	MT2B	internal exon	partial	Pla1a	protein_coding	0	0	0	0	0.4819	0.2817	0.1204
chr4:6419195-6419294	MT2B	internal exon	partial	Nsmaf	protein_coding	0.0958	0.1049	0.1279	0.0142	0	0.0747	0.1733
chr13:96391666-96391796	MT2B	internal exon	partial	Poc5	protein_coding	14.5103	15.877	21.6853	18.4415	4.425	1.94	1.1051
chr2:25529418-25529529	MT2B	internal exon	partial	Traf2	protein_coding	0.0288	0.036	0.123	0.4596	0.2635	0.2053	0.1645
[truncated: 8,624 more rows]
