# Supplementary material for: Long terminal repeats power evolution of genes and gene expression programs in mammalian oocytes and zygotes
Source: HighWire-hosted journal article supplement (doi:10.1101/gr.216150.116), 2017-05-18
Supplement: Supplemental_Table_S3.xlsx [file Supplemental_Table_S3.xlsx]

## Sheet: Table S3
Franke et al. - Table S3 NGS data collection
species	stages	sequenced RNA	NGS type	reference ID	use	reference
Mus musculus	oocyte & early development stages	total RNA	Illumina, 76nt, paired end	E-MTAB-2950	Fig. 2B, 2C, 3, 4B, 4C, 6A-C, S3, S5A, S5C, S5D	Abe et al., 2015
Mus musculus	oocyte & zygote	total RNA , polyA	Illumina, 76nt, paired end	E-MTAB-4775	Fig. 2B, 2C, 3, 4B, 4C, 5A, 6, 7A, S3, S4B, S5C, S5D	Karlic et al., 2016
Mus musculus	oocyte & 2-cell stage	polyA	Illumina, 50nt, single end	PRJDB2994	Fig. 4A	Hamazaki et al, 2015
Mus musculus	oocyte	polyA	Illumina, 40nt, single end	ERP000689	Fig. 4A	Smallwood et al., 2011
Mus musculus	primordial germ cells	polyA (Smart-seq)	Illumina, 101nt, single end	GSE41908	Fig. 4A	Yamaguchi et al., 2013
Mus musculus	spermatogenesis	polyA	Illumina, 100nt, single end	GSE35005	Fig.4A	Gan et al., 2012
Mus musculus	early development stages	polyA	Illumina, 43-73nt, single end	GSE45719	Fig.4A, S3B	Deng et al., 2014
Mus musculus	oocyte & early development stages	ribo-	SOLiD 5500xl, 50nt, single end	DRA001066	Fig. S5B	Park et al., 2013
Mus musculus	oocyte	small RNA	Illumina HiSeq 2000, 50nt, single end	GSE45983	Fig. 6F	Garcia-Lopez et al., 2014
Mus musculus	oocyte & zygote	total RNA	Illumina, 125nt, paired end	GSE86470	Fig. 4D, 4E	this report
Mesocricetus auratus	oocyte	total RNA	Illumina, 125nt, paired end	GSE86470	Fig. 2B, 2C, 4D, 4E, 5C, 7A	this report
Bos taurus	oocyte & early development stages	total RNA, polyA	Illumina, 80nt, single end	GSE52415	Fig. 2B, 2C	Graf et al., 2014
Homo sapiens	oocyte & early development stages	polyA	Illumina HiSeq 2000, 90nt, paired end	GSE44183	Fig. 2B, 2C, S6B	Xue et al. 2013
