# Supplementary material for: Long terminal repeats power evolution of genes and gene expression programs in mammalian oocytes and zygotes
Source: HighWire-hosted journal article supplement (doi:10.1101/gr.216150.116), 2017-05-18
Supplement: Supplemental_Table_S5.xlsx [file Supplemental_Table_S5.xlsx]

## Sheet: Sheet 1
Franke et al. Table S5 - Annotation of class III (ERVL) LTR exaptations in Mesocricetus auratus
genome coordinates	LTR group	exaptation type	full / partial	host gene	oocyte [LTR FPKM]
NW_004801729.1:3136055-3136256	ERV3-16A3_LTR	tagging	partial	mA.13521.1	0.00375
NW_004801637.1:13473920-13474016	Eutr10	3' exon	partial	Ninl	0.0005
NW_004801633.1:12185513-12185629	Eutr10	tagging	partial	mA.5782.1	0.0013
NW_004801959.1:154062-154267	LTR101_Mam	5' exon	partial	mA.17373.1	0.0024
NW_004801618.1:24409659-24409895	LTR101_Mam	tagging	partial	Pet117	0.00035
NW_004801626.1:8163316-8163531	LTR105_Mam	tagging	partial	mA.4792.1	0.0008
NW_004801609.1:3598809-3599038	LTR16	5' exon	partial	mA.1885.1	0.00025
NW_004801659.1:299484-299683	LTR16	5' exon	partial	mA.8536.1	0.0048
NW_004801627.1:3046381-3046791	LTR16	internal exon	partial	mA.4863.1	0.0008
NW_004801742.1:3115537-3115608	LTR16	tagging	partial	mA.14021.1	0.40795
NW_004801792.1:1884810-1885001	LTR16A	3' exon	partial	mA.15705.2	0.0004
NW_004801637.1:19036019-19036136	LTR16A	internal exon	partial	Scp2d1	0.0001
NW_004801704.1:6190614-6190916	LTR16A	tagging	partial	mA.12197.1	0.00235
NW_004801633.1:12181260-12181421	LTR16A1	5' exon	partial	mA.5781.1	0.00025
NW_004801691.1:8388314-8388545	LTR16A1	3' exon	partial	mA.11110.1	0.0005
NW_004801673.1:2008161-2008497	LTR16A1	tagging	partial	mA.9637.1	0.0035
NW_004801705.1:4885445-4885539	LTR16A1	tagging	partial	Ogfod2	0.0003
NW_004801729.1:5036234-5036584	LTR16A2	tagging	partial	Itga9	0.0023
NW_004801679.1:4093643-4093817	LTR16B1	3' exon	partial	mA.10135.1	0.0004
NW_004801641.1:5004938-5005352	LTR16B1	internal exon	partial	mA.6850.1	0.00275
NW_004801626.1:10665245-10665548	LTR16B2	tagging	partial	mA.4814.1	0.0025
NW_004801651.1:10316341-10316679	LTR16C	5' exon	partial	mA.7873.1	0.0002
NW_004801728.1:3710924-3711089	LTR16C	3' exon	partial	mA.13445.1	0.003
NW_004801616.1:5101485-5101754	LTR16C	internal exon	partial	mA.3343.3	0.0001
NW_004801654.1:564590-564896	LTR16C	internal exon	partial	mA.8080.1	0.00355
NW_004801652.1:9029837-9029957	LTR16C	tagging	partial	mA.7989.1	0.00135
NW_004801691.1:4410838-4411018	LTR16C	tagging	partial	mA.11065.1	0.0058
NW_004801618.1:5893507-5893759	LTR16D	tagging	partial	Dtwd1	0.0005
NW_004801630.1:298867-299040	LTR16D1	tagging	partial	mA.5286.1	0.0187
NW_004801630.1:299072-299303	LTR16D1	tagging	partial	mA.5286.1	0.0187
NW_004801610.1:2453583-2453671	LTR16E1	tagging	partial	Shc3	0.0041
NW_004801615.1:1700826-1701299	LTR16E1	tagging	partial	Ccdc53	0.00185
NW_004801679.1:6955417-6955580	LTR16E1	tagging	partial	mA.10157.1	0.0033
NW_004801713.1:318481-318572	LTR16E1	tagging	partial	mA.12600.1	0.00805
NW_004801752.1:4272564-4272641	LTR16E1	tagging	partial	LOC106022263	0.00015
NW_004805253.1:4639-4824	LTR16E2	3' exon	partial	mA.18014.1	18.6773
NW_004801607.1:9971269-9971465	LTR16E2	internal exon	partial	mA.1485.1	0.00015
NW_004801742.1:2919171-2919245	LTR16E2	internal exon	partial	mA.14018.1	0.00025
NW_004805253.1:4270-4401	LTR16E2	tagging	partial	mA.18014.1	18.6773
NW_004801653.1:176720-177230	LTR33	3' exon	full	mA.8027.1	0.00895
NW_004801604.1:31535856-31536025	LTR33	3' exon	partial	mA.276.2	0.00215
NW_004801643.1:91583-91809	LTR33	3' exon	partial	mA.7062.1	1.0726
NW_004801611.1:8509687-8510088	LTR33	internal exon	partial	mA.2320.1	0.00055
NW_004801640.1:3876641-3876871	LTR33	internal exon	partial	mA.6662.1	0.00015
NW_004801695.1:5878038-5878358	LTR33	internal exon	partial	mA.11446.1	0.00575
NW_004801607.1:18943865-18944097	LTR33	tagging	partial	mA.1554.1	0.0003
NW_004801608.1:10567834-10568152	LTR33	tagging	partial	mA.1669.1	0.002
NW_004801610.1:79590-79756	LTR33	tagging	partial	mA.2034.1	0.1924
NW_004801696.1:5849601-5849741	LTR33	tagging	partial	Smpdl3b	0.00085
NW_004801723.1:6440782-6441014	LTR33	tagging	partial	LOC106022114	0.00115
NW_004801754.1:4505721-4505822	LTR33	tagging	partial	mA.14494.1	0.0002
NW_004804161.1:3419-3757	LTR33	tagging	partial	LOC101828357	0.44625
NW_004801754.1:4505869-4506093	LTR33	tagging	partial	mA.14494.1	0.0002
NW_004801680.1:3937009-3937263	LTR33A	5' exon	full	Ntrk3	0.00025
NW_004801609.1:140-270	LTR33A	5' exon	partial	LOC101835552	7.69505
NW_004801729.1:3742527-3742840	LTR33A	3' exon	partial	Mobp	0.01185
NW_004801604.1:20794122-20794279	LTR33A	internal exon	partial	Pde6c	0.0011
NW_004801679.1:6471044-6471181	LTR33A	internal exon	partial	LOC106021749	0.0013
NW_004801604.1:2161330-2161751	LTR33A	tagging	partial	Casp7	0.00235
NW_004801794.1:2333757-2333822	LTR33A	tagging	partial	Ttf1	0.0028
NW_004801708.1:5461404-5461785	LTR33A_	5' exon	partial	Rragd	0.00185
NW_004801689.1:283393-283511	LTR33A_	3' exon	partial	mA.10816.2	0.01995
NW_004801608.1:23689540-23689659	LTR33A_	tagging	partial	LOC106022882	5e-05
NW_004801630.1:16405670-16406091	LTR33A_	tagging	partial	mA.5423.1	0.0002
NW_004801671.1:58464-58802	LTR33A_	tagging	partial	Rad51c	0.04085
NW_004801689.1:1711830-1711936	LTR33A_	tagging	partial	mA.10828.1	0.0002
NW_004801739.1:4492605-4492839	LTR33A_	tagging	partial	mA.13916.1	0.0002
NW_004801935.1:176460-176616	LTR33C	3' exon	partial	LOC101833307	0.05645
NW_004801793.1:506088-506183	LTR33C	3' exon	partial	LOC106022448	0.04305
NW_004801691.1:1878702-1878830	LTR33C	internal exon	partial	Piwil3	0.00575
NW_004801647.1:9578187-9578394	LTR33C	tagging	partial	mA.7559.1	0.0001
NW_004801647.1:9577971-9578166	LTR33C	tagging	partial	mA.7559.1	0.0001
NW_004803370.1:12435-12781	LTR40a	3' exon	partial	mA.17703.1	0.5616
NW_004801612.1:25756642-25756949	LTR40a	internal exon	partial	mA.2538.1	0
NW_004801676.1:4174189-4174359	LTR40a	internal exon	partial	mA.9829.1	0.0001
NW_004801606.1:23323267-23323348	LTR40a	tagging	partial	mA.1277.1	5e-05
NW_004801691.1:8508393-8508721	LTR40a	tagging	partial	mA.11113.1	0.0131
NW_004806591.1:3208-3334	LTR40b	3' exon	partial	LOC101832004	0.879
NW_004801671.1:8908725-8908794	LTR40b	tagging	partial	Tnfaip1	0.00315
NW_004805705.1:7322-7499	LTR40b	tagging	partial	LOC106022950	0.1245
NW_004801722.1:2754385-2754539	LTR40c	3' exon	partial	mA.13185.1	0.00205
NW_004801748.1:1360857-1361241	LTR40c	tagging	partial	mA.14200.2	0.001
NW_004801859.1:813495-813667	LTR41	3' exon	partial	mA.16904.2	0.0007
NW_004801678.1:211608-212108	LTR41	internal exon	partial	mA.10017.1	0.0021
NW_004801766.1:3255533-3255652	LTR41	tagging	partial	Tulp3	0.00055
NW_004801832.1:1612985-1613098	LTR41	tagging	partial	Atp5sl	0.00235
NW_004801604.1:55354409-55354584	LTR41B	tagging	partial	Dhcr7	0.0003
NW_004801678.1:541910-542545	LTR41C	internal exon	partial	mA.10018.6	0.00195
NW_004801625.1:4234526-4234960	LTR41C	tagging	partial	mA.4705.1	0.01245
NW_004801742.1:2913220-2913429	LTR50	3' exon	partial	mA.14018.2	0.00015
NW_004801678.1:934845-935150	LTR50	internal exon	partial	mA.10023.4	0.0197
NW_004801693.1:7816253-7816414	LTR50	internal exon	partial	mA.11230.1	0.00015
NW_004801620.1:19857884-19858154	LTR50	tagging	partial	mA.3970.1	0.00115
NW_004801637.1:13051874-13052086	LTR50	tagging	partial	LOC101827323	0.0113
NW_004801637.1:13052115-13052353	LTR50	tagging	partial	LOC101827323	0.0113
NW_004801813.1:646729-646867	LTR50	tagging	partial	LOC101825443	0.00045
NW_004801715.1:3498589-3498655	LTR52	3' exon	partial	LOC101822603	0.00285
NW_004802425.1:19588-19953	LTR55	tagging	partial	LOC101829411	12.3542
NW_004801608.1:28748222-28748241	LTR67B	tagging	partial	mA.1796.1	0.00125
NW_004801696.1:2249058-2249311	LTR67B	tagging	partial	Trim62	0.00125
NW_004801696.1:2248907-2249008	LTR67B	tagging	partial	Trim62	0.00125
NW_004801792.1:1189632-1189717	LTR67B	tagging	partial	mA.15696.1	0.00265
NW_004801628.1:837151-837269	LTR75	internal exon	partial	Abcg1	0.0006
NW_004801802.1:1164063-1164306	LTR79	internal exon	partial	mA.15967.1	0.0026
NW_004801723.1:6443030-6443162	LTR79	tagging	partial	LOC106022114	0.0005
NW_004801753.1:3740154-3740263	LTR79	tagging	partial	mA.14435.2	0.00105
NW_004801724.1:940223-940357	LTR80A	internal exon	partial	Mboat2	0.0023
NW_004801624.1:18775909-18776021	LTR80B	internal exon	partial	Ubtf	0.0001
NW_004801642.1:362770-363126	LTR82A	tagging	partial	LOC106021393	0.01915
NW_004801642.1:363263-363385	LTR82A	tagging	partial	LOC106021393	0.01915
NW_004801672.1:7626631-7626845	LTR82A	tagging	partial	LOC101823832	0.00055
NW_004801653.1:4503874-4504111	LTR82B	tagging	partial	Pvrl3	0.00905
NW_004801634.1:14424749-14425080	LTR84a	3' exon	partial	mA.5921.2	0.00045
NW_004801735.1:5757591-5757724	LTR84a	tagging	partial	Ube3a	0.00215
NW_004801689.1:4906630-4906758	LTR86A1	tagging	partial	Kcnq3	5e-05
NW_004801705.1:1562441-1562608	LTR86A1	tagging	partial	Glt1d1	0.00145
NW_004801636.1:5377553-5377684	LTR86A2	tagging	partial	Mut	0.00165
NW_004801704.1:1631474-1631646	LTR87	3' exon	partial	Maoa	0.0005
NW_004801614.1:16303851-16303945	LTR87	internal exon	partial	Flii	0.0003
NW_004801721.1:4123577-4123913	LTR87	internal exon	partial	mA.13113.1	0.0002
NW_004801822.1:1515312-1515508	LTR87	internal exon	partial	Fam161b	0.00285
NW_004801676.1:8927226-8927295	LTR87	tagging	partial	mA.9890.1	0.00015
NW_004801622.1:7306089-7306163	LTR89B	tagging	partial	Kmt2a	0.0281
NW_004801667.1:7253646-7253776	LTR89B	tagging	partial	Smc2	0.00655
NW_004801689.1:4870060-4870222	LTR89B	tagging	partial	Hhla1	0.00405
NW_004801673.1:3091991-3092177	LTR89B	tagging	partial	mA.9647.1	0.0004
NW_004801673.1:3092276-3092454	LTR89B	tagging	partial	mA.9647.1	0.0004
NW_004801719.1:3039496-3039925	MER21B	5' exon	full	Cnot2	0.0001
NW_004801646.1:2465529-2465930	MER21B	5' exon	partial	Erg	0.0005
NW_004801663.1:9244405-9244785	MER21B	5' exon	partial	Fnip2	0.0008
NW_004801689.1:1361989-1362089	MER21B	internal exon	partial	mA.10823.1	0.00055
NW_004801606.1:196609-196846	MER21B	tagging	partial	mA.1133.4	0.0865
NW_004801618.1:6719502-6719626	MER21B	tagging	partial	mA.3643.1	0.00035
NW_004801636.1:10244661-10244815	MER21B	tagging	partial	mA.6175.2	0.0076
NW_004801636.1:10245311-10245479	MER21B	tagging	partial	mA.6175.2	0.0076
NW_004801636.1:10269812-10269974	MER21B	tagging	partial	mA.6176.1	0.012
NW_004801636.1:10270645-10270913	MER21B	tagging	partial	mA.6176.1	0.012
NW_004801636.1:13462617-13462748	MER21B	tagging	partial	LOC101832796	0.0192
NW_004801636.1:13469895-13470054	MER21B	tagging	partial	LOC101832796	0.0192
NW_004801636.1:13477899-13478111	MER21B	tagging	partial	mA.6246.1	0.00455
NW_004801641.1:9982448-9982921	MER21B	tagging	partial	Cenpn	0.0336
NW_004801678.1:9893785-9894102	MER21B	tagging	partial	mA.10098.1	0.001
NW_004801736.1:487228-487391	MER21B	tagging	partial	mA.13772.1	0.0646
NW_004801605.1:20411954-20412456	MER21C	5' exon	partial	Cat	0
NW_004801628.1:15634194-15634444	MER21C	5' exon	partial	Tet1	0.00015
NW_004801660.1:8239362-8239859	MER21C	5' exon	partial	mA.8691.1	0.0001
NW_004801899.1:420295-420713	MER21C	5' exon	partial	mA.17254.1	0.0009
NW_004801622.1:7289439-7289513	MER21C	3' exon	partial	Ift46	0.00075
NW_004801778.1:893442-893990	MER21C	3' exon	partial	LOC106022382	0.00215
NW_004801780.1:4050306-4050490	MER21C	internal exon	partial	mA.15320.2	0.00055
NW_004801606.1:4380248-4380597	MER21C	tagging	partial	Iws1	0.0062
NW_004801636.1:10256564-10256717	MER21C	tagging	partial	mA.6175.4	0.0043
NW_004801628.1:15633923-15634156	MER21C	tagging	partial	Tet1	0.00015
NW_004801636.1:10256259-10256429	MER21C	tagging	partial	mA.6175.4	0.0043
NW_004801636.1:13462944-13463217	MER21C	tagging	partial	LOC101832796	0.0192
NW_004811019.1:858-925	MER21C	tagging	partial	mA.18574.1	4.6108
NW_004801641.1:14930829-14931005	MER54A	tagging	partial	Banp	0.0007
NW_004801670.1:10120640-10120752	MER54B	3' exon	partial	Slc25a14	0.00085
NW_004801799.1:1871983-1872327	MER54B	tagging	partial	Znf471	0.00135
NW_004801752.1:4308351-4308436	MER54B	tagging	partial	LOC106022263	0.01345
NW_004801607.1:4591207-4591756	MER68	internal exon	partial	Pde4d	0.00195
NW_004801728.1:2932212-2932589	MER68	internal exon	partial	mA.13440.1	0.00175
NW_004801690.1:3478218-3478403	MER68	tagging	partial	Gabbr2	0.0005
NW_004801690.1:3478014-3478187	MER68	tagging	partial	Gabbr2	0.0005
NW_004801646.1:11870381-11870563	MER70A	internal exon	partial	mA.7507.3	0
NW_004801640.1:15488992-15489099	MER70B	5' exon	partial	mA.6771.1	0.0003
NW_004801622.1:13996939-13997374	MER73	5' exon	full	Arhgap20	0.00015
NW_004801673.1:1955071-1955881	MER73	5' exon	full	mA.9636.1	0.0014
NW_004801616.1:8176879-8177099	MER73	5' exon	partial	mA.3367.1	0.00015
NW_004801616.1:8177142-8177270	MER73	5' exon	partial	mA.3367.1	0.00015
NW_004801652.1:13630036-13630182	MER73	tagging	partial	LOC101834989	0.0001
NW_004801606.1:23445461-23445608	MER74A	internal exon	partial	mA.1278.1	0.0005
NW_004801606.1:23445900-23445968	MER74A	internal exon	partial	mA.1278.1	0.0005
NW_004801614.1:17844588-17844690	MER74A	tagging	partial	Iba57	0.00015
NW_004801694.1:3414072-3414175	MER74A	tagging	partial	mA.11310.2	0.0386
NW_004801657.1:2150226-2150634	MER74B	tagging	partial	Trim35	0.11225
NW_004801717.1:6138048-6138158	MER74B	tagging	partial	Gtf2f1	0.0034
NW_004801747.1:3893987-3894388	MER74B	tagging	partial	mA.14186.1	0.00135
NW_004801763.1:4094455-4094965	MER74B	tagging	partial	LOC101840855	0.00445
NW_004801654.1:9596175-9596417	MER74C	5' exon	full	mA.8207.1	0.00095
NW_004801665.1:11223484-11223576	MER76	internal exon	partial	Nutf2	0.00035
NW_004801819.1:454113-454541	MER76	internal exon	partial	LOC106022537	0.0017
NW_004801743.1:3540494-3541049	MER77	internal exon	partial	mA.14067.1	0.00255
NW_004801705.1:1127471-1127741	MER77	tagging	partial	mA.12214.1	0.02
NW_004801705.1:1128042-1128300	MER77	tagging	partial	mA.12214.1	0.02
NW_004801721.1:5282905-5282975	MER77	tagging	partial	mA.13124.1	0.00015
NW_004801721.1:5283366-5283546	MER77	tagging	partial	mA.13124.1	0.00015
NW_004801819.1:1482022-1482363	MER77B	5' exon	partial	Fbxo27	0.0014
NW_004801618.1:11622855-11623490	MER77B	3' exon	partial	mA.3702.2	0.0019
NW_004801606.1:4380718-4380776	MER77B	tagging	partial	Iws1	0.0062
NW_004804732.1:6643-6952	MLT1A	5' exon	partial	mA.17942.1	0.1697
NW_004801622.1:13509962-13510179	MLT1A	5' exon	partial	Sik2	5e-05
NW_004801608.1:28289092-28289347	MLT1A	3' exon	partial	mA.1792.1	0
NW_004801649.1:1533918-1534246	MLT1A	internal exon	partial	LOC106021485	0.01395
NW_004801623.1:18382506-18382633	MLT1A	internal exon	partial	mA.4367.1	0.0001
NW_004801623.1:18382823-18382964	MLT1A	internal exon	partial	mA.4367.1	0.0001
NW_004801606.1:23445803-23445889	MLT1A	internal exon	partial	mA.1278.1	0.0005
NW_004801611.1:8379442-8379502	MLT1A	internal exon	partial	mA.2320.1	0.0011
NW_004801606.1:23445624-23445778	MLT1A	internal exon	partial	mA.1278.1	0.0005
NW_004801649.1:982842-982926	MLT1A	tagging	partial	Adamtsl1	0.03925
NW_004801691.1:5004313-5004533	MLT1A	tagging	partial	LOC106021848	5e-05
NW_004801645.1:1883235-1883414	MLT1A	tagging	partial	Ube3d	0.0006
NW_004801717.1:644241-644400	MLT1A	tagging	partial	mA.12798.1	0.0187
NW_004801618.1:8399171-8399495	MLT1A	tagging	partial	Anapc1	0.0014
NW_004801649.1:982983-983113	MLT1A	tagging	partial	Adamtsl1	0.03925
NW_004801723.1:4189363-4189420	MLT1A	tagging	partial	Bdh2	0.00145
NW_004801610.1:14227292-14227501	MLT1A	tagging	partial	Slc35b3	0.0024
NW_004801637.1:19080902-19081210	MLT1A	tagging	partial	Scp2d1	0.0007
NW_004801673.1:1330013-1330161	MLT1A	tagging	partial	mA.9628.9	0.0315
NW_004801654.1:8290285-8290410	MLT1A	tagging	partial	mA.8192.1	0.0006
NW_004801691.1:821700-821911	MLT1A	tagging	partial	LOC106021852	0.0006
NW_004801790.1:2665327-2665612	MLT1A	tagging	partial	mA.15624.1	0.0059
NW_004801611.1:7948490-7948750	MLT1A	tagging	partial	mA.2311.1	0.00045
NW_004801632.1:18154716-18154909	MLT1A	tagging	partial	Map3k13	0.00055
NW_004801673.1:1330290-1330435	MLT1A	tagging	partial	mA.9628.9	0.0315
NW_004801644.1:5410081-5410186	MLT1A	tagging	partial	mA.7179.1	0.00075
NW_004801611.1:16852113-16852454	MLT1A	tagging	partial	Mtus1	0.0114
NW_004801676.1:2579147-2579263	MLT1A	tagging	partial	mA.9823.1	0.0046
NW_004801618.1:18027371-18027725	MLT1A	tagging	partial	mA.3726.1	0.00075
NW_004801750.1:2526995-2527221	MLT1A	tagging	partial	Htatip2	0.00365
NW_004801799.1:1931135-1931471	MLT1A	tagging	partial	Znf667	0.0015
NW_004801623.1:20809500-20809761	MLT1A0	5' exon	full	mA.4376.1	0
NW_004801628.1:7940530-7940832	MLT1A0	5' exon	full	mA.5072.1	0.0002
NW_004801638.1:13824870-13825039	MLT1A0	5' exon	partial	mA.6439.1	0.0001
NW_004801628.1:4336571-4336663	MLT1A0	3' exon	partial	Ggt5	0.0011
NW_004801716.1:6656054-6656253	MLT1A0	3' exon	partial	Trio	0.0001
NW_004801681.1:55282-55543	MLT1A0	3' exon	partial	mA.10243.2	0.0489
NW_004801679.1:5881030-5881122	MLT1A0	3' exon	partial	mA.10149.2	0.00285
NW_004801695.1:5753901-5753977	MLT1A0	3' exon	partial	mA.11444.1	0.00015
NW_004801609.1:15697545-15697800	MLT1A0	3' exon	partial	mA.1977.1	0.00015
NW_004801716.1:6232284-6232447	MLT1A0	3' exon	partial	mA.12788.1	0.0014
NW_004801620.1:20273653-20273792	MLT1A0	internal exon	partial	Baz2b	0.0003
NW_004801687.1:2941059-2941387	MLT1A0	internal exon	partial	mA.10685.1	0.00015
NW_004801710.1:4159420-4159590	MLT1A0	internal exon	partial	Dnah7	0.0005
NW_004801606.1:36156815-36157092	MLT1A0	internal exon	partial	mA.1368.1	0
NW_004801675.1:11333616-11333685	MLT1A0	tagging	partial	mA.9801.1	0.01035
NW_004801659.1:5065357-5065450	MLT1A0	tagging	partial	Ca12	0.0004
NW_004806568.1:3509-3634	MLT1A0	tagging	partial	Fbxl12	2.06695
NW_004801765.1:1165346-1165447	MLT1A0	tagging	partial	mA.14788.3	0.0189
NW_004801690.1:4252808-4252916	MLT1A0	tagging	partial	Ccdc180	0.03495
NW_004801738.1:1891551-1891785	MLT1A0	tagging	partial	mA.13862.1	0.0013
NW_004801637.1:19338788-19339072	MLT1A0	tagging	partial	Polr3f	0.0001
NW_004801624.1:13539956-13540201	MLT1A0	tagging	partial	Prkca	0.00065
NW_004801736.1:487811-487870	MLT1A0	tagging	partial	mA.13772.1	0.0646
NW_004801617.1:23738767-23738845	MLT1A0	tagging	partial	Ston2	0.00075
NW_004801611.1:16846257-16846351	MLT1A0	tagging	partial	Mtus1	0.0114
NW_004801667.1:8802579-8802915	MLT1A0	tagging	partial	mA.9200.1	0.0006
NW_004801612.1:13506159-13506280	MLT1A0	tagging	partial	Hnf4g	0
NW_004801792.1:1884118-1884293	MLT1A0	tagging	partial	mA.15705.2	0.0004
NW_004801622.1:354578-354822	MLT1A0	tagging	partial	Tbrg1	0.04555
NW_004801691.1:7837353-7837465	MLT1A0	tagging	partial	mA.11100.1	0.00395
NW_004801923.1:107939-108048	MLT1A0	tagging	partial	Sult1c3	0.01785
NW_004801777.1:2090055-2090213	MLT1A0	tagging	partial	LOC106022377	0.0003
NW_004801608.1:19228365-19228428	MLT1A0	tagging	partial	mA.1716.1	0
NW_004801653.1:7234817-7235125	MLT1A0	tagging	partial	mA.8055.1	0.00045
NW_004801765.1:1920825-1921155	MLT1A0	tagging	partial	Fat3	0.00195
NW_004801607.1:16078732-16078960	MLT1A0	tagging	partial	mA.1527.1	5e-05
NW_004801611.1:23117300-23117441	MLT1A0	tagging	partial	Dctd	0.00025
NW_004801612.1:13506298-13506457	MLT1A0	tagging	partial	Hnf4g	0
NW_004801676.1:7780086-7780399	MLT1A0	tagging	partial	mA.9864.2	0.0133
NW_004801674.1:9397539-9397862	MLT1A0	tagging	partial	mA.9744.1	0.00065
NW_004801625.1:15701250-15701470	MLT1A0	tagging	partial	Rnf219	0.0006
NW_004801773.1:2119884-2120018	MLT1A0	tagging	partial	Sp4	0.00125
NW_004801640.1:14437953-14438026	MLT1A0	tagging	partial	mA.6760.3	0.00015
NW_004801614.1:22855873-22855901	MLT1A0	tagging	partial	mA.3160.1	0.0017
NW_004801617.1:23739179-23739457	MLT1A0	tagging	partial	Ston2	0.00075
NW_004801742.1:1656382-1656579	MLT1A0	tagging	partial	mA.13992.3	0.011
NW_004801756.1:3760992-3761164	MLT1A0	tagging	partial	mA.14538.1	0.0031
NW_004801607.1:11936393-11936739	MLT1A1	5' exon	full	mA.1490.1	0.00065
NW_004801674.1:7893540-7893858	MLT1A1	5' exon	full	Prkce	0.0001
NW_004801604.1:12451998-12452337	MLT1A1	5' exon	partial	Cnnm2	0.00055
NW_004801671.1:6892543-6892658	MLT1A1	5' exon	partial	Cdk5r1	0.0005
NW_004801742.1:4871449-4871662	MLT1A1	5' exon	partial	mA.14040.1	0.0008
NW_004801631.1:3797356-3797727	MLT1A1	3' exon	partial	LOC106021225	0.01115
NW_004801610.1:27894291-27894431	MLT1A1	3' exon	partial	Lrrc16a	0
NW_004801701.1:1929525-1929871	MLT1A1	internal exon	partial	mA.11896.1	0.00105
NW_004801661.1:6300566-6300670	MLT1A1	internal exon	partial	mA.8757.2	0.01075
NW_004801604.1:20797700-20797843	MLT1A1	internal exon	partial	Pde6c	0.0011
NW_004801686.1:8506386-8506518	MLT1A1	internal exon	partial	mA.10664.4	0.00015
NW_004801731.1:1152329-1152449	MLT1A1	internal exon	partial	mA.13606.2	0.00255
NW_004801604.1:14990132-14990267	MLT1A1	tagging	partial	mA.162.1	0.0002
NW_004801798.1:1816744-1817054	MLT1A1	tagging	partial	mA.15862.1	0.00125
NW_004801719.1:5699871-5700227	MLT1A1	tagging	partial	mA.12930.1	0.00065
NW_004803370.1:14142-14520	MLT1A1	tagging	partial	mA.17703.1	0.5616
NW_004801686.1:4143959-4144070	MLT1A1	tagging	partial	mA.10609.1	0.00175
NW_004801604.1:46868294-46868420	MLT1A1	tagging	partial	Ms4a3	0
NW_004801739.1:3066160-3066322	MLT1A1	tagging	partial	mA.13898.1	0.00325
NW_004801624.1:1910176-1910255	MLT1A1	tagging	partial	mA.4428.1	0.00235
NW_004801620.1:20983693-20983823	MLT1A1	tagging	partial	mA.3983.1	0.0001
NW_004806568.1:3216-3282	MLT1A1	tagging	partial	Fbxl12	2.06695
NW_004801621.1:6412094-6412424	MLT1A1	tagging	partial	mA.4008.1	0.0001
NW_004801606.1:10784763-10784884	MLT1A1	tagging	partial	Kiaa1328	0.00325
NW_004801704.1:5852897-5853025	MLT1A1	tagging	partial	mA.12195.1	0.00065
NW_004801723.1:352099-352366	MLT1A1	tagging	partial	mA.13218.1	0.04445
NW_004801620.1:20938265-20938357	MLT1A1	tagging	partial	mA.3983.2	0.00135
NW_004801689.1:5376562-5376653	MLT1A1	tagging	partial	Tmem71	0.00085
NW_004801672.1:5833003-5833181	MLT1A1	tagging	partial	mA.9579.2	0.00085
NW_004801686.1:7846779-7846897	MLT1A1	tagging	partial	mA.10658.1	0.0013
NW_004801605.1:30405795-30405907	MLT1A1	tagging	partial	mA.956.1	0.0012
NW_004801658.1:7184164-7184259	MLT1A1	tagging	partial	Mitd1	5e-05
NW_004801617.1:9471335-9471444	MLT1A1	tagging	partial	mA.3491.1	0.0004
NW_004801762.1:54675-54734	MLT1A1	tagging	partial	mA.14717.1	2.90705
NW_004801713.1:317965-318070	MLT1A1	tagging	partial	Asap3	0.0225
NW_004801798.1:1817341-1817483	MLT1A1	tagging	partial	mA.15862.1	0.00125
NW_004801652.1:12391030-12391325	MLT1B	5' exon	full	mA.8013.1	5e-05
NW_004801638.1:14266742-14267113	MLT1B	5' exon	partial	mA.6448.2	0.00035
NW_004801671.1:10229072-10229274	MLT1B	5' exon	partial	Ssh2	0.0001
NW_004801621.1:6442903-6443133	MLT1B	5' exon	partial	mA.4009.1	0.00025
NW_004801606.1:23483907-23484208	MLT1B	3' exon	partial	Cables1	0.0001
NW_004801630.1:9972358-9972656	MLT1B	3' exon	partial	mA.5388.1	0.00085
NW_004801673.1:1491811-1491967	MLT1B	3' exon	partial	mA.9629.1	0.0041
NW_004801638.1:16809643-16809958	MLT1B	3' exon	partial	Tspyl5	0.0006
NW_004801604.1:25661898-25662238	MLT1B	internal exon	partial	mA.243.1	0
NW_004801627.1:19563919-19564271	MLT1B	internal exon	partial	Trak2	0.0001
NW_004801605.1:11563001-11563312	MLT1B	internal exon	partial	LOC106021867	0.00015
NW_004801661.1:11327000-11327134	MLT1B	internal exon	partial	Top2a	0.00055
NW_004801631.1:6498552-6498895	MLT1B	internal exon	partial	Sec16b	0.0002
NW_004801614.1:15824952-15825081	MLT1B	internal exon	partial	mA.3076.1	0.0008
NW_004801729.1:660567-660753	MLT1B	tagging	partial	mA.13482.1	0.01015
NW_004801622.1:12961274-12961446	MLT1B	tagging	partial	mA.4189.1	0.00095
NW_004801625.1:15700164-15700469	MLT1B	tagging	partial	Rnf219	0.0006
NW_004801859.1:491660-491871	MLT1B	tagging	partial	Krba1	0.0114
NW_004801610.1:4542708-4542846	MLT1B	tagging	partial	LOC101835041	0.0005
NW_004801608.1:17977739-17978035	MLT1B	tagging	partial	Fuca2	0.0002
NW_004801715.1:6680869-6681150	MLT1B	tagging	partial	mA.12764.1	0.00135
NW_004801644.1:10943417-10943844	MLT1B	tagging	partial	Ltbp1	0.0022
NW_004801800.1:787767-787916	MLT1B	tagging	partial	mA.15929.1	0.00125
NW_004801646.1:193924-194190	MLT1B	tagging	partial	Zbtb21	0.02225
NW_004801734.1:1762048-1762100	MLT1B	tagging	partial	Lrrc30	0.0516
NW_004801744.1:339558-339722	MLT1B	tagging	partial	Adcy1	0.05655
NW_004801613.1:6379814-6379994	MLT1B	tagging	partial	Parvb	0.00085
NW_004801674.1:9354214-9354436	MLT1B	tagging	partial	mA.9743.2	0.0001
NW_004801631.1:12960383-12960431	MLT1B	tagging	partial	Slc19a2	0.00275
NW_004801856.1:6752-7135	MLT1B	tagging	partial	mA.16871.1	2.2489
NW_004801694.1:6660662-6660789	MLT1B	tagging	partial	mA.11349.1	0.0087
NW_004801610.1:4539187-4539361	MLT1B	tagging	partial	Znf169	0.00035
NW_004801624.1:13659596-13659753	MLT1B	tagging	partial	Cacng5	0.00045
NW_004801723.1:1665129-1665460	MLT1B	tagging	partial	mA.13234.1	0.0083
NW_004801622.1:12961489-12961621	MLT1B	tagging	partial	mA.4189.1	0.00095
NW_004801613.1:26109168-26109269	MLT1B	tagging	partial	Ercc5	0
NW_004801673.1:1495139-1495233	MLT1B	tagging	partial	mA.9629.1	0.0041
NW_004801695.1:6372679-6372816	MLT1B	tagging	partial	LOC106021891	0.00035
NW_004801629.1:14054711-14054841	MLT1B	tagging	partial	mA.5238.1	0.00145
NW_004801638.1:13507792-13507900	MLT1B	tagging	partial	mA.6433.1	0.0015
NW_004801610.1:9555438-9555538	MLT1B	tagging	partial	Rnf182	0.00015
NW_004801604.1:1967321-1967510	MLT1B	tagging	partial	mA.52.1	0.0004
NW_004801697.1:9118510-9118838	MLT1B	tagging	partial	Srgap1	0.00095
NW_004801604.1:2205520-2205592	MLT1B	tagging	partial	mA.60.1	0.0003
NW_004801715.1:6682073-6682149	MLT1B	tagging	partial	mA.12764.1	0.00135
NW_004801687.1:9746366-9746485	MLT1B	tagging	partial	LOC101823211	0.0002
NW_004801605.1:53821675-53822042	MLT1B	tagging	partial	mA.1105.1	0
NW_004801610.1:9555874-9555994	MLT1B	tagging	partial	Rnf182	0.00015
NW_004801746.1:2478563-2478801	MLT1B	tagging	partial	mA.14138.1	0.01025
NW_004801624.1:13659965-13660122	MLT1B	tagging	partial	Cacng5	0.00045
NW_004801691.1:6144473-6144620	MLT1B	tagging	partial	mA.11084.1	0.00185
NW_004801689.1:1254782-1255048	MLT1C	3' exon	partial	mA.10822.3	0.03555
NW_004801607.1:19617241-19617495	MLT1C	3' exon	partial	mA.1563.1	0.0001
NW_004801606.1:23452287-23452651	MLT1C	3' exon	partial	mA.1278.1	0.00015
NW_004801613.1:6834432-6834618	MLT1C	internal exon	partial	mA.2669.1	5e-05
NW_004801723.1:354318-354516	MLT1C	internal exon	partial	mA.13218.1	0.05085
NW_004801688.1:835432-835684	MLT1C	internal exon	partial	mA.10775.1	0.01175
NW_004801604.1:1509624-1509847	MLT1C	tagging	partial	mA.46.1	0.0013
NW_004801791.1:2195393-2195594	MLT1C	tagging	partial	Galnt9	0.0005
NW_004801681.1:4214208-4214417	MLT1C	tagging	partial	mA.10288.1	0.002
NW_004801619.1:15970979-15971125	MLT1C	tagging	partial	mA.3828.1	0.00265
NW_004801758.1:1462221-1462449	MLT1C	tagging	partial	Kcnt1	0.001
NW_004801611.1:18845186-18845283	MLT1C	tagging	partial	Zfp42	0.00265
NW_004801731.1:96010-96345	MLT1C	tagging	partial	Taf1a	0.0617
NW_004801681.1:4213881-4214025	MLT1C	tagging	partial	mA.10288.1	0.002
NW_004801615.1:173917-174218	MLT1C	tagging	partial	LOC101844096	0.0246
NW_004801614.1:17483295-17483689	MLT1C	tagging	partial	Znf496	0.00035
NW_004801845.1:74023-74266	MLT1C	tagging	partial	Ikbkg	0.337
NW_004801845.1:72372-72635	MLT1C	tagging	partial	Ikbkg	0.337
NW_004801627.1:4949257-4949576	MLT1C2	5' exon	partial	Tns1	0.001
NW_004801648.1:2536971-2537374	MLT1C2	3' exon	full	mA.7610.1	0.00045
NW_004801617.1:10268815-10269039	MLT1C2	3' exon	partial	mA.3497.1	0.00035
NW_004801625.1:15484292-15484495	MLT1C2	3' exon	partial	mA.4725.1	0.00015
NW_004801678.1:2439952-2440124	MLT1C2	3' exon	partial	Grid1	0.00935
NW_004801680.1:4461183-4461326	MLT1C2	3' exon	partial	Acan	0.0012
NW_004801765.1:809466-809912	MLT1C2	3' exon	partial	mA.14782.1	0.00265
NW_004801606.1:2494774-2494859	MLT1C2	internal exon	partial	mA.1178.1	0.00065
NW_004801640.1:15972110-15972313	MLT1C2	internal exon	partial	mA.6776.1	0.00055
NW_004801686.1:8514039-8514278	MLT1C2	internal exon	partial	mA.10664.5	0.00065
NW_004801689.1:1423585-1423832	MLT1C2	internal exon	partial	mA.10825.1	0.0004
NW_004801604.1:77576150-77576437	MLT1C2	tagging	partial	mA.751.1	0.00015
NW_004801606.1:38041287-38041578	MLT1C2	tagging	partial	mA.1372.3	0.0065
NW_004801608.1:18394166-18394450	MLT1C2	tagging	partial	Plagl1	0.00095
NW_004801619.1:19059724-19059843	MLT1C2	tagging	partial	Trmt44	0.00015
NW_004801622.1:20854282-20854461	MLT1C2	tagging	partial	Tbc1d21	0.0003
NW_004801658.1:1511761-1511953	MLT1C2	tagging	partial	LOC101823559	0.01605
NW_004801636.1:8291362-8291751	MLT1C2	tagging	partial	mA.6150.1	0.0003
NW_004801641.1:13227430-13227586	MLT1C2	tagging	partial	Gse1	0.0007
NW_004801673.1:1333487-1333554	MLT1C2	tagging	partial	mA.9628.5	0.0151
NW_004801644.1:14232343-14232477	MLT1C2	tagging	partial	Gpatch11	0.00115
NW_004801652.1:7812733-7812870	MLT1C2	tagging	partial	mA.7975.1	0.0008
NW_004801717.1:5943961-5944023	MLT1C2	tagging	partial	Cd70	0.0056
NW_004801689.1:3195364-3195719	MLT1C2	tagging	partial	LOC106021828	0.001
NW_004801726.1:6466171-6466472	MLT1C2	tagging	partial	mA.13396.1	0.0006
NW_004801691.1:6298198-6298475	MLT1C2	tagging	partial	Ksr2	0.03045
NW_004801691.1:6298989-6299079	MLT1C2	tagging	partial	Ksr2	0.03045
NW_004801734.1:3308797-3308958	MLT1C2	tagging	partial	mA.13712.1	0.00395
NW_004801694.1:2958200-2958492	MLT1C2	tagging	partial	mA.11302.1	0.00275
NW_004801758.1:1463095-1463260	MLT1C2	tagging	partial	Kcnt1	0.001
NW_004801758.1:2366991-2367062	MLT1C2	tagging	partial	Dph7	0.0576
NW_004801734.1:3309385-3309468	MLT1C2	tagging	partial	mA.13712.1	0.00395
NW_004801758.1:2366525-2366608	MLT1C2	tagging	partial	Dph7	0.0576
NW_004801777.1:2591377-2591546	MLT1C2	tagging	partial	mA.15170.1	0.00045
NW_004801604.1:15449280-15449637	MLT1D	5' exon	full	mA.168.1	5e-05
NW_004801746.1:4858230-4858676	MLT1D	5' exon	full	mA.14168.1	0.00055
NW_004801737.1:2663784-2664036	MLT1D	5' exon	partial	mA.13829.3	0.0027
NW_004801703.1:1825950-1826226	MLT1D	3' exon	full	mA.12140.1	0.02115
NW_004801640.1:15636675-15636998	MLT1D	3' exon	partial	Tmtc1	0.00125
NW_004801606.1:33015698-33015854	MLT1D	3' exon	partial	mA.1330.2	0.0002
NW_004801770.1:3043409-3043792	MLT1D	3' exon	partial	mA.15013.1	0.00185
NW_004801638.1:12040398-12040837	MLT1D	3' exon	partial	Dpys	0.0004
NW_004801613.1:17869965-17870233	MLT1D	3' exon	partial	Ano6	0
NW_004801959.1:158027-158416	MLT1D	3' exon	partial	mA.17373.1	0.01465
NW_004801661.1:6300746-6301092	MLT1D	internal exon	partial	mA.8757.4	0.0114
NW_004801681.1:5769532-5769888	MLT1D	internal exon	partial	mA.10303.1	5e-05
NW_004801604.1:20795940-20796427	MLT1D	internal exon	partial	Pde6c	0.0011
NW_004801674.1:5382826-5382953	MLT1D	internal exon	partial	mA.9706.3	0.00165
NW_004801749.1:2540653-2540904	MLT1D	tagging	partial	mA.14249.1	0.00195
NW_004801656.1:4900193-4900403	MLT1D	tagging	partial	mA.8292.1	0.00035
NW_004801604.1:71538498-71538672	MLT1D	tagging	partial	Cd2bp2	0.00015
NW_004801686.1:8666227-8666334	MLT1D	tagging	partial	Ercc6l2	0.0001
NW_004801664.1:3598578-3598723	MLT1D	tagging	partial	Etv1	0.00165
NW_004801646.1:2357706-2357837	MLT1D	tagging	partial	mA.7411.1	0.00305
NW_004801605.1:50517762-50517987	MLT1D	tagging	partial	Cir1	0.00105
NW_004801649.1:5880141-5880402	MLT1D	tagging	partial	mA.7695.1	0.00865
NW_004801625.1:2996981-2997043	MLT1D	tagging	partial	mA.4696.1	0.0011
NW_004801633.1:13380159-13380352	MLT1D	tagging	partial	mA.5794.1	0.0001
NW_004801612.1:1599894-1600144	MLT1D	tagging	partial	Ubxn2b	0.0251
NW_004801655.1:1367469-1367711	MLT1D	tagging	partial	Kdm4c	0.0024
NW_004801877.1:837630-837826	MLT1D	tagging	partial	Qki	0.0042
NW_004801624.1:6660590-6660971	MLT1D	tagging	partial	Cd300lf	0.00015
NW_004801676.1:8926757-8927146	MLT1D	tagging	partial	mA.9890.1	0.00015
NW_004801674.1:5383455-5383674	MLT1D	tagging	partial	mA.9706.1	0.0081
NW_004801633.1:13380435-13380512	MLT1D	tagging	partial	mA.5794.1	0.0001
NW_004801613.1:12233163-12233518	MLT1D	tagging	partial	LOC101841249	0.00925
NW_004801687.1:5272820-5273159	MLT1D	tagging	partial	LOC106021815	0.0037
NW_004801604.1:71538189-71538265	MLT1D	tagging	partial	Cd2bp2	0.00015
NW_004801673.1:6693543-6693793	MLT1D	tagging	partial	mA.9656.1	0.0007
NW_004801686.1:3453849-3454068	MLT1D	tagging	partial	mA.10603.2	0.0037
NW_004801671.1:7562062-7562469	MLT1D	tagging	partial	mA.9507.3	0.0022
NW_004801605.1:50517630-50517704	MLT1D	tagging	partial	Cir1	0.00105
NW_004801686.1:3453409-3453617	MLT1D	tagging	partial	mA.10603.2	0.0037
NW_004801664.1:3598280-3598521	MLT1D	tagging	partial	Etv1	0.00165
NW_004801604.1:13726511-13726649	MLT1D	tagging	partial	mA.149.1	0.0001
NW_004801761.1:4184427-4184848	MLT1D	tagging	partial	Adamts17	0.0013
NW_004801614.1:23311625-23311768	MLT1D	tagging	partial	mA.3164.1	0.00245
NW_004801695.1:6779832-6779968	MLT1E1	internal exon	partial	mA.11460.1	0.0001
NW_004801658.1:7639256-7639345	MLT1E1	tagging	partial	Mgat4a	0.02565
NW_004801691.1:1951849-1952014	MLT1E1	tagging	partial	mA.11012.1	0.0008
NW_004801745.1:2770564-2771107	MLT1E1A	internal exon	partial	Rps6ka6	0.00165
NW_004801695.1:5298273-5298625	MLT1E1A	internal exon	partial	mA.11439.1	5e-05
NW_004801693.1:2212515-2212724	MLT1E1A	tagging	partial	mA.11194.2	0.00335
NW_004801622.1:9178399-9178476	MLT1E1A	tagging	partial	mA.4176.1	0.001
NW_004801654.1:8610573-8610732	MLT1E2	internal exon	partial	mA.8195.1	0.00145
NW_004801905.1:93015-93239	MLT1E2	internal exon	partial	LOC101822370	0.0154
NW_004801624.1:1667096-1667145	MLT1E2	tagging	partial	mA.4422.1	0.0022
NW_004801723.1:6385026-6385296	MLT1E2	tagging	partial	mA.13260.1	0.0372
NW_004801742.1:1361734-1361795	MLT1E2	tagging	partial	mA.13989.1	0.01875
NW_004801709.1:2555969-2556296	MLT1E2	tagging	partial	Fam185a	0.0078
NW_004801616.1:439414-439542	MLT1E2	tagging	partial	Rasgef1b	0.04705
NW_004801644.1:9545380-9545593	MLT1E2	tagging	partial	mA.7229.1	0.0001
NW_004801694.1:6659859-6660205	MLT1E2	tagging	partial	mA.11349.1	0.0087
NW_004801744.1:382032-382192	MLT1E2	tagging	partial	Adcy1	0.01805
NW_004801604.1:31525501-31525705	MLT1E3	internal exon	partial	mA.276.1	0.00015
NW_004801653.1:4892906-4893191	MLT1E3	internal exon	partial	mA.8050.1	0.0003
NW_004801631.1:14414929-14414970	MLT1E3	internal exon	partial	Cd247	0.00075
NW_004801631.1:14415030-14415276	MLT1E3	internal exon	partial	Cd247	0.00075
NW_004801729.1:2267306-2267556	MLT1E3	tagging	partial	Nktr	0.0009
NW_004801612.1:6533776-6534214	MLT1E3	tagging	partial	Cpa6	0.0012
NW_004801605.1:2833053-2833527	MLT1E3	tagging	partial	mA.800.1	0.00895
NW_004801670.1:2320673-2321158	MLT1F	5' exon	full	mA.9397.1	0.0004
NW_004801645.1:11532719-11533141	MLT1F	3' exon	partial	mA.7345.1	0.00045
NW_004801638.1:14296591-14296892	MLT1F	3' exon	partial	mA.6449.1	0.00055
NW_004801723.1:700796-701230	MLT1F	internal exon	partial	mA.13220.1	0.00065
NW_004801621.1:17006157-17006603	MLT1F	internal exon	partial	mA.4058.1	0.0002
NW_004801781.1:1761319-1761389	MLT1F	tagging	partial	mA.15370.1	0.00125
NW_004801617.1:5714272-5714630	MLT1F	tagging	partial	mA.3471.1	0.002
NW_004801894.1:10-211	MLT1F	tagging	partial	Znf558	421.38
NW_004801626.1:9194239-9194317	MLT1F	tagging	partial	Otx1	0.0019
NW_004801722.1:2773847-2773961	MLT1F	tagging	partial	mA.13185.3	0.00035
NW_004801630.1:16219290-16219456	MLT1F	tagging	partial	mA.5421.1	0.0009
NW_004801622.1:8886843-8887088	MLT1F	tagging	partial	Bud13	0.00305
NW_004801630.1:16218762-16218872	MLT1F	tagging	partial	mA.5421.1	0.0009
NW_004801681.1:2685991-2686438	MLT1F1	3' exon	full	mA.10263.1	0.0005
NW_004801651.1:2658922-2659141	MLT1F1	3' exon	partial	mA.7812.1	0.00065
NW_004801681.1:2688567-2688885	MLT1F1	internal exon	partial	mA.10263.1	0.00045
NW_004801701.1:1758545-1758941	MLT1F1	internal exon	partial	mA.11894.1	0.00025
NW_004801689.1:1338047-1338179	MLT1F1	tagging	partial	mA.10823.1	0.0149
NW_004801859.1:824725-825120	MLT1F1	tagging	partial	mA.16906.1	0.0017
NW_004801819.1:191582-191743	MLT1F1	tagging	partial	LOC101838020	0.0601
NW_004801659.1:7885139-7885388	MLT1F1	tagging	partial	mA.8612.2	0.00145
NW_004801689.1:1337863-1338002	MLT1F1	tagging	partial	mA.10823.1	0.0149
NW_004801622.1:6159171-6159565	MLT1F1	tagging	partial	mA.4127.1	0.0039
NW_004801819.1:191062-191367	MLT1F1	tagging	partial	LOC101838020	0.0601
NW_004802425.1:18116-18220	MLT1F1	tagging	partial	LOC101829411	12.3542
NW_004802425.1:17838-17962	MLT1F1	tagging	partial	LOC101829411	12.3542
NW_004805253.1:6941-7118	MLT1F2	5' exon	full	mA.18014.1	0.1566
NW_004801723.1:3982551-3982960	MLT1F2	5' exon	full	Manba	5e-05
NW_004801693.1:5562515-5563013	MLT1F2	3' exon	partial	mA.11207.1	0.0004
NW_004801686.1:8790529-8790789	MLT1F2	3' exon	partial	mA.10668.1	0.00085
NW_004801771.1:1948781-1949148	MLT1F2	3' exon	partial	Apba2	0.0015
NW_004801695.1:3350343-3350804	MLT1F2	internal exon	partial	mA.11413.1	0.001
NW_004805253.1:6360-6485	MLT1F2	internal exon	partial	mA.18014.1	0.35665
NW_004801799.1:1095866-1095956	MLT1F2	tagging	partial	Znf304	0.015
NW_004801799.1:1095639-1095775	MLT1F2	tagging	partial	Znf304	0.015
NW_004801608.1:30200840-30201138	MLT1F2	tagging	partial	mA.1819.1	0.00025
NW_004801673.1:6186978-6187166	MLT1G	3' exon	partial	mA.9654.1	0.0012
NW_004801801.1:904271-904472	MLT1G	internal exon	partial	Jade3	0.00085
NW_004801627.1:15498470-15498715	MLT1G	tagging	partial	Gpr1	0.0007
NW_004801627.1:15498766-15498901	MLT1G	tagging	partial	Gpr1	0.0007
NW_004801900.1:409448-409855	MLT1G	tagging	partial	Ptpn5	0.0091
NW_004801608.1:15052592-15053068	MLT1G1	3' exon	full	mA.1703.1	0.0001
NW_004801654.1:10623059-10623554	MLT1G1	tagging	partial	mA.8222.1	0.0001
NW_004801698.1:2974205-2974405	MLT1G1	tagging	partial	mA.11735.1	0.0004
NW_004801615.1:23064162-23064447	MLT1G3	5' exon	partial	Csrp2	5e-05
NW_004801763.1:3453154-3453333	MLT1G3	5' exon	partial	Vash1	0.00015
NW_004801686.1:8631697-8632102	MLT1G3	3' exon	partial	Ercc6l2	0.00065
NW_004801636.1:66551-66700	MLT1G3	internal exon	partial	B3gat2	0.05375
NW_004801624.1:13661356-13661525	MLT1G3	tagging	partial	Cacng5	0.00045
NW_004801609.1:11111203-11111418	MLT1G3	tagging	partial	Ssuh2	0.0012
NW_004801684.1:9290130-9290320	MLT1G3	tagging	partial	Slamf8	0.00145
NW_004801673.1:9252087-9252324	MLT1G3	tagging	partial	Fam174a	0.0004
NW_004801763.1:3452988-3453100	MLT1G3	tagging	partial	Vash1	0.00015
NW_004801694.1:3461775-3461896	MLT1H	5' exon	partial	mA.11311.1	0.0044
NW_004801781.1:433189-433411	MLT1H	5' exon	partial	mA.15335.2	0.0022
NW_004801688.1:9968953-9969373	MLT1H	5' exon	partial	mA.10806.1	0.0002
NW_004801737.1:4352019-4352394	MLT1H	3' exon	partial	mA.13837.2	0.00225
NW_004801860.1:591906-592264	MLT1H	3' exon	partial	mA.16915.1	0.0033
NW_004801649.1:9056835-9057144	MLT1H	3' exon	partial	Tek	0.0011
NW_004801723.1:1720333-1720507	MLT1H	internal exon	partial	mA.13235.2	0.00085
NW_004801667.1:8236231-8236439	MLT1H	tagging	partial	mA.9195.2	0.00065
NW_004801637.1:12612538-12612839	MLT1H	tagging	partial	Srxn1	0.0042
NW_004801631.1:6012762-6013155	MLT1H	tagging	partial	mA.5483.1	0.001
NW_004801679.1:5878763-5878982	MLT1H	tagging	partial	mA.10149.2	0.00285
NW_004801796.1:219738-219991	MLT1H	tagging	partial	mA.15776.2	0.26525
NW_004801638.1:16666335-16666605	MLT1H	tagging	partial	mA.6483.1	0.00035
NW_004801615.1:7208101-7208287	MLT1H	tagging	partial	mA.3235.2	0.00265
NW_004801637.1:12612215-12612297	MLT1H	tagging	partial	Srxn1	0.0042
NW_004801715.1:1954414-1954639	MLT1H	tagging	partial	mA.12736.1	0.0021
NW_004801679.1:336815-337023	MLT1H1	internal exon	partial	Tecr	0.06445
NW_004801623.1:10472287-10472514	MLT1H1	internal exon	partial	mA.4327.2	0.00025
NW_004801610.1:5382974-5383433	MLT1H1	internal exon	partial	mA.2077.1	0.0004
NW_004801628.1:6567310-6567503	MLT1H1	tagging	partial	mA.5064.1	0.00175
NW_004801646.1:3931356-3931561	MLT1H1	tagging	partial	mA.7428.1	0.0129
NW_004801860.1:598687-599095	MLT1H2	5' exon	partial	mA.16915.1	0.0011
NW_004801648.1:7545720-7545827	MLT1H2	internal exon	partial	mA.7632.2	0.0003
NW_004801739.1:5149955-5150127	MLT1H2	internal exon	partial	mA.13925.1	0.0002
NW_004801613.1:23656361-23656469	MLT1H2	internal exon	partial	LOC101836265	0
NW_004801691.1:8509730-8509950	MLT1H2	tagging	partial	mA.11113.1	0.0131
NW_004801644.1:9126710-9126816	MLT1H2	tagging	partial	mA.7222.1	0.00085
NW_004801608.1:28288774-28289060	MLT1I	3' exon	partial	mA.1792.1	0
NW_004801693.1:5974003-5974182	MLT1I	3' exon	partial	mA.11212.3	0.0019
NW_004801671.1:5825123-5825467	MLT1I	3' exon	partial	mA.9489.2	0.0024
NW_004801658.1:2498118-2498489	MLT1I	internal exon	partial	mA.8460.1	0.00115
NW_004801636.1:4335971-4336107	MLT1I	internal exon	partial	mA.6129.2	0.00035
NW_004801629.1:9105087-9105233	MLT1I	internal exon	partial	mA.5196.1	0.0001
NW_004802813.1:4181-4304	MLT1I	tagging	partial	mA.17599.1	0.6155
NW_004801610.1:6171629-6171753	MLT1I	tagging	partial	mA.2083.1	0.00025
NW_004801631.1:6013375-6013442	MLT1I	tagging	partial	mA.5483.1	0.001
NW_004801626.1:10664025-10664139	MLT1I	tagging	partial	mA.4814.1	0.0025
NW_004801634.1:3359865-3360080	MLT1I	tagging	partial	mA.5873.1	0.0013
NW_004801667.1:8219015-8219150	MLT1I	tagging	partial	mA.9195.1	0.0004
NW_004801635.1:12928543-12928803	MLT1I	tagging	partial	Ttc4	5e-05
NW_004801631.1:6013165-6013243	MLT1I	tagging	partial	mA.5483.1	0.001
NW_004801663.1:189255-189564	MLT1I	tagging	partial	mA.8916.1	0.05175
NW_004801620.1:19847026-19847392	MLT1I	tagging	partial	mA.3970.1	0.0004
NW_004801882.1:277078-277158	MLT1I	tagging	partial	mA.17145.1	0.0034
NW_004801626.1:11531914-11532223	MLT1J	3' exon	partial	mA.4824.1	0.0002
NW_004801651.1:11212496-11212717	MLT1J	3' exon	partial	LOC106021505	5e-05
NW_004801704.1:6190991-6191440	MLT1J	3' exon	partial	mA.12197.1	0.00235
NW_004801641.1:4991616-4991796	MLT1J	3' exon	partial	mA.6850.2	0.00115
NW_004801604.1:61416134-61416382	MLT1J	internal exon	partial	mA.597.1	0
NW_004801630.1:5740152-5740273	MLT1J	internal exon	partial	Tpra1	0.0001
NW_004801706.1:8437755-8438102	MLT1J	internal exon	partial	mA.12389.1	0.00085
NW_004801636.1:11832460-11832619	MLT1J	tagging	partial	Med20	0.00285
NW_004801679.1:2944419-2944521	MLT1J	tagging	partial	Gab1	0.0074
NW_004801682.1:4418084-4418248	MLT1J	tagging	partial	mA.10356.1	0.0008
NW_004801723.1:6426002-6426238	MLT1J	tagging	partial	LOC106022114	0.0081
NW_004801638.1:14351443-14351588	MLT1J	tagging	partial	mA.6450.1	5e-05
NW_004801681.1:2460611-2460803	MLT1J	tagging	partial	mA.10262.2	0.0085
NW_004801613.1:2473188-2473362	MLT1J	tagging	partial	Mgat3	0.01145
NW_004801695.1:4979122-4979329	MLT1J	tagging	partial	mA.11434.1	0.0046
NW_004801792.1:2144044-2144329	MLT1J	tagging	partial	mA.15708.1	0.003
NW_004801734.1:4674829-4674997	MLT1J	tagging	partial	mA.13729.1	0.0016
NW_004801623.1:10491386-10491624	MLT1J	tagging	partial	mA.4327.3	0.00045
NW_004801790.1:2502295-2502751	MLT1J	tagging	partial	mA.15621.1	0.0032
NW_004801622.1:20901199-20901356	MLT1J	tagging	partial	mA.4279.1	0.0003
NW_004801689.1:4872860-4873039	MLT1J	tagging	partial	Hhla1	0.00405
NW_004801686.1:1059618-1059783	MLT1J	tagging	partial	mA.10571.1	0.0343
NW_004801705.1:1549210-1549405	MLT1J	tagging	partial	mA.12217.1	0.0143
NW_004801643.1:132403-132514	MLT1J	tagging	partial	mA.7065.1	0.05435
NW_004801626.1:9846627-9846710	MLT1J	tagging	partial	LOC106021162	0.0007
NW_004801713.1:5350131-5350212	MLT1J1	3' exon	partial	Rsg1	0.0008
NW_004801792.1:2590588-2590654	MLT1J1	tagging	partial	Grk5	0.0028
NW_004801729.1:2016702-2016770	MLT1J1	tagging	partial	mA.13505.1	0.00695
NW_004801729.1:2016590-2016625	MLT1J1	tagging	partial	mA.13505.1	0.00695
NW_004801729.1:662558-662742	MLT1J1	tagging	partial	mA.13483.1	0.00195
NW_004801651.1:2916402-2916494	MLT1J1	tagging	partial	mA.7817.1	0.00015
NW_004801730.1:3509434-3509658	MLT1J2	3' exon	partial	mA.13578.6	0.00055
NW_004801604.1:3793944-3794253	MLT1J2	internal exon	partial	mA.70.1	0.00035
NW_004801754.1:4113676-4113935	MLT1J2	internal exon	partial	mA.14485.1	0.00015
NW_004802418.1:27488-27567	MLT1J2	tagging	partial	mA.17517.1	0.35685
NW_004801796.1:218673-218817	MLT1J2	tagging	partial	mA.15776.2	0.26525
NW_004801607.1:18949493-18949581	MLT1J2	tagging	partial	mA.1555.1	5e-05
NW_004801621.1:6154988-6155277	MLT1K	5' exon	full	Csnk1g3	0.00155
NW_004801688.1:1172711-1172869	MLT1K	5' exon	partial	Usb1	0.0015
NW_004801761.1:3187770-3187897	MLT1K	5' exon	partial	mA.14706.1	0.0002
NW_004801749.1:4208871-4208947	MLT1K	3' exon	partial	LOC101841925	0.0039
NW_004801686.1:2922278-2922449	MLT1K	internal exon	partial	Smad5	0.00015
NW_004801604.1:18454986-18455281	MLT1K	internal exon	partial	Znf518a	5e-05
NW_004801608.1:2514235-2514478	MLT1K	internal exon	partial	mA.1638.1	0.00175
NW_004801614.1:2343089-2343437	MLT1K	internal exon	partial	Srr	0.00035
NW_004801687.1:2946502-2946698	MLT1K	internal exon	partial	mA.10685.1	0.0005
NW_004801713.1:4927626-4927834	MLT1K	internal exon	partial	LOC101829639	0.0001
NW_004801693.1:7399264-7399364	MLT1K	tagging	partial	mA.11227.1	0.00025
NW_004801693.1:7399001-7399158	MLT1K	tagging	partial	mA.11227.1	0.00025
NW_004801686.1:1058946-1059192	MLT1K	tagging	partial	mA.10571.1	0.0343
NW_004801658.1:8286725-8286868	MLT1K	tagging	partial	mA.8499.1	5e-05
NW_004801667.1:8803018-8803258	MLT1K	tagging	partial	mA.9200.1	0.0006
NW_004801630.1:16405537-16405654	MLT1K	tagging	partial	mA.5423.1	0.0002
NW_004801754.1:4503658-4504159	MLT1K	tagging	partial	mA.14493.1	0.00245
NW_004801698.1:3005874-3006059	MLT1K	tagging	partial	mA.11735.2	0.0024
NW_004801721.1:95614-95760	MLT1K	tagging	partial	Plekhf1	0.07695
NW_004801845.1:178050-178399	MLT1K	tagging	partial	Slc10a3	0.03335
NW_004801769.1:3499498-3499745	MLT1K	tagging	partial	Rfx5	0.00175
NW_004801753.1:4296959-4297200	MLT1L	3' exon	partial	mA.14442.1	0.00025
NW_004801730.1:532033-532426	MLT1L	internal exon	partial	mA.13559.2	0.0027
NW_004801618.1:6717377-6717553	MLT1L	internal exon	partial	mA.3643.1	0.0008
NW_004801624.1:13660994-13661156	MLT1L	tagging	partial	Cacng5	0.00045
NW_004801715.1:1853109-1853353	MLT1L	tagging	partial	Ccdc3	0.0041
NW_004801651.1:4548632-4548873	MLT1L	tagging	partial	mA.7825.2	0.00735
NW_004801634.1:14569541-14569716	MLT1L	tagging	partial	mA.5921.3	0.0001
NW_004801641.1:16403509-16403610	MLT1L	tagging	partial	Tcf25	0.00115
NW_004801848.1:894214-894273	MLT1M	tagging	partial	LOC101844788	0.07835
NW_004801642.1:4713580-4713702	MLT1M	tagging	partial	Lama4	0.0001
NW_004801805.1:840574-840763	MLT1M	tagging	partial	mA.16044.1	0.006
NW_004801691.1:8414500-8414572	MLT1M	tagging	partial	mA.11111.1	0.2377
NW_004801784.1:200584-200784	MLT1M	tagging	partial	mA.15419.2	0.0423
NW_004801792.1:1189935-1190029	MLT1N2	3' exon	partial	mA.15696.1	0.00265
NW_004801674.1:2692426-2692698	MLT1N2	internal exon	partial	mA.9691.1	0.0006
NW_004801608.1:28748107-28748221	MLT1N2	tagging	partial	mA.1796.1	0.00125
NW_004801761.1:3650621-3650789	MLT1N2	tagging	partial	mA.14709.1	0.0105
NW_004801728.1:5110902-5111326	MLT1O	3' exon	partial	mA.13456.1	5e-05
NW_004801605.1:19739041-19739548	MLT1O	tagging	partial	Kiaa1549l	0.0004
NW_004801643.1:2858905-2859167	MLT1O	tagging	partial	mA.7100.1	0.00105
NW_004801610.1:4694856-4695317	MLT2B1	3' exon	partial	mA.2074.1	0.0005
NW_004801607.1:3683850-3684346	MLT2B1	internal exon	partial	mA.1453.1	0.00055
NW_004801606.1:27916530-27916809	MLT2B1	internal exon	partial	mA.1301.1	5e-05
NW_004801649.1:5882875-5883314	MLT2B1	tagging	partial	mA.7695.1	0.00865
NW_004801643.1:91313-91477	MLT2B1	tagging	partial	mA.7062.1	1.0726
NW_004801643.1:90862-91062	MLT2B1	tagging	partial	mA.7062.1	1.0726
NW_004801613.1:17971007-17971445	MLT2B1	tagging	partial	mA.2755.1	0.0006
NW_004806664.1:6094-6263	MLT2B1	tagging	partial	mA.18199.1	0.1746
NW_004801715.1:3931743-3931842	MLT2B2	tagging	partial	mA.12753.1	0.00125
NW_004801736.1:780652-780908	MLT2B2	tagging	partial	mA.13778.1	0.04255
NW_004801723.1:4298822-4299256	MLT2B3	5' exon	partial	mA.13251.1	0.00025
NW_004801664.1:2086436-2086680	MLT2B3	5' exon	partial	Znf277	0.0003
NW_004801818.1:1376696-1376823	MLT2B3	5' exon	partial	LOC101840060	0.00035
NW_004801604.1:50464177-50464736	MLT2B3	3' exon	partial	mA.435.1	0
NW_004801608.1:14000456-14000927	MLT2B3	3' exon	partial	mA.1694.1	5e-05
NW_004801613.1:12819393-12819591	MLT2B3	3' exon	partial	mA.2721.2	0.0012
NW_004801613.1:12819735-12820077	MLT2B3	internal exon	partial	mA.2721.2	0.00035
NW_004801788.1:1261603-1261699	MLT2B3	internal exon	partial	Znf438	0.0018
NW_004801729.1:2316663-2316776	MLT2B3	tagging	partial	Sec22c	0.0002
NW_004801611.1:1175207-1175491	MLT2B3	tagging	partial	mA.2248.1	0.01925
NW_004801813.1:1634404-1634483	MLT2B3	tagging	partial	Atrx	0.00035
NW_004801737.1:4330171-4330377	MLT2B3	tagging	partial	mA.13837.1	0.0004
NW_004801762.1:58473-58571	MLT2B3	tagging	partial	mA.14717.1	2.90705
NW_004801608.1:25826488-25826641	MLT2B3	tagging	partial	mA.1777.1	0.00045
NW_004801694.1:2815712-2816160	MLT2B3	tagging	partial	mA.11297.1	0.00155
NW_004801638.1:14296450-14296547	MLT2B3	tagging	partial	mA.6449.1	0.00055
NW_004801620.1:9803420-9803488	MLT2B3	tagging	partial	mA.3942.1	0.0137
NW_004801664.1:2087248-2087367	MLT2B3	tagging	partial	Znf277	0.00335
NW_004801614.1:14287732-14287977	MLT2B4	tagging	partial	LOC101826162	0.0011
NW_004801765.1:1437860-1438293	MLT2B4	tagging	partial	Smco4	0.01015
NW_004801643.1:192192-192325	MLT2B4	tagging	partial	mA.7067.1	0.01385
NW_004801681.1:7781542-7781978	MLT2B4	tagging	partial	mA.10321.1	0.00295
NW_004801799.1:1827741-1828041	MLT2B5	internal exon	partial	Smim17	0.00015
NW_004801671.1:1343030-1343155	MLT2B5	internal exon	partial	Brip1	0.00265
NW_004801607.1:9911191-9911345	MLT2B5	internal exon	partial	Srek1	0.0017
NW_004801690.1:8010101-8010165	MLT2B5	tagging	partial	Kif24	0.0019
NW_004801619.1:15929987-15930052	MLT2B5	tagging	partial	mA.3823.1	0.0028
NW_004801620.1:20934224-20934529	MLT2C1	tagging	partial	mA.3983.2	0.00135
NW_004801609.1:28792282-28792376	MLT2C1	tagging	partial	mA.2026.1	0
NW_004801766.1:1928074-1928154	MLT2C1	tagging	partial	Fgf6	0.01125
NW_004801731.1:5322275-5322632	MLT2C2	tagging	partial	Kctd3	0.0056
NW_004801606.1:31585067-31585392	MLT2C2	tagging	partial	mA.1327.1	0.0005
NW_004801621.1:13518389-13518591	MLT2C2	tagging	partial	mA.4044.3	0.0065
NW_004801630.1:5769301-5769566	MLT2D	5' exon	full	mA.5350.1	0.00025
NW_004801742.1:2056268-2056535	MLT2D	5' exon	partial	mA.14002.1	0.003
NW_004801615.1:20872081-20872332	MLT2D	5' exon	partial	mA.3288.4	0.0002
NW_004801758.1:2233997-2234153	MLT2D	tagging	partial	mA.14597.1	0.01755
NW_004807475.1:2120-2262	MLT2D	tagging	partial	LOC106023026	1.20135
NW_004801794.1:1814899-1815219	MLT2D	tagging	partial	Gtf3c5	0.0339
NW_004801794.1:1814724-1814784	MLT2D	tagging	partial	Gtf3c5	0.0339
NW_004801608.1:25458784-25459033	MLT2D	tagging	partial	Mtrf1l	5e-05
NW_004801713.1:3712047-3712153	MLT2D	tagging	partial	Aldh4a1	0.00155
NW_004801735.1:4265761-4266012	MLT2D	tagging	partial	mA.13763.1	0.01215
NW_004801730.1:3508813-3509111	MLT2D	tagging	partial	mA.13578.6	0.00055
NW_004801626.1:3686433-3686845	MLT2F	internal exon	partial	mA.4774.1	0.00175
NW_004801667.1:315889-316499	MLT2F	tagging	partial	Mbd1	0.0173
NW_004801793.1:505822-506002	MLT2F	tagging	partial	LOC106022448	0.04305
NW_004801935.1:175950-176437	MLT2F	tagging	partial	LOC101833307	0.05645
NW_004801605.1:2336799-2337216	MT2A	5' exon	full	mA.796.1	0.0002
NW_004801760.1:438647-439107	MT2A	5' exon	full	Rims3	0.01655
NW_004801606.1:30084593-30084946	MT2A	5' exon	full	Znf407	0
NW_004801678.1:554929-555322	MT2A	5' exon	full	mA.10018.1	0.00555
NW_004801739.1:4753090-4753546	MT2A	5' exon	full	Nsmce2	5e-05
NW_004801788.1:1900203-1900641	MT2A	5' exon	full	Kiaa1462	0.00015
NW_004801611.1:18807400-18807740	MT2A	5' exon	partial	mA.2378.1	0.0001
NW_004801766.1:3244198-3244529	MT2A	5' exon	partial	LOC101844157	0.00015
NW_004801768.1:3548095-3548493	MT2A	5' exon	partial	Xrcc2	0.0001
NW_004801691.1:6915256-6915796	MT2A	5' exon	partial	mA.11096.1	0.0029
NW_004801685.1:412976-413299	MT2A	5' exon	partial	mA.10517.6	0.04645
NW_004801629.1:17866129-17866549	MT2A	5' exon	partial	mA.5259.1	0.0001
NW_004801715.1:3897833-3898359	MT2A	5' exon	partial	mA.12752.2	0.00105
NW_004801673.1:6693960-6694396	MT2A	5' exon	partial	mA.9656.1	0.0007
NW_004801685.1:412277-412407	MT2A	5' exon	partial	mA.10517.6	0.04645
NW_004801819.1:1906189-1906310	MT2A	5' exon	partial	Leutx	0.00065
NW_004801676.1:8512332-8512442	MT2A	5' exon	partial	mA.9866.1	0.00105
NW_004806251.1:2063-2242	MT2A	5' exon	partial	mA.18152.1	0.134
NW_004801818.1:1319881-1320069	MT2A	5' exon	partial	LOC101840060	0.0003
NW_004801630.1:16217083-16217234	MT2A	5' exon	partial	mA.5420.1	0.0005
NW_004801628.1:9119713-9120007	MT2A	5' exon	partial	mA.5086.1	0.0107
NW_004801701.1:4613603-4613804	MT2A	5' exon	partial	LOC106021934	0.00115
NW_004801608.1:30355972-30356256	MT2A	5' exon	partial	mA.1821.1	0
NW_004803440.1:4745-5107	MT2A	5' exon	partial	mA.17724.1	2.9973
NW_004801640.1:12221071-12221579	MT2A	5' exon	partial	mA.6716.3	0.0008
NW_004806251.1:757-1193	MT2A	3' exon	full	mA.18152.1	23.1573
NW_004801610.1:15196540-15196759	MT2A	3' exon	full	Rreb1	0.0002
NW_004801737.1:1114057-1114620	MT2A	3' exon	partial	Ptprt	0.0096
NW_004801706.1:3537867-3538224	MT2A	3' exon	partial	mA.12342.1	0.0003
NW_004801604.1:46841647-46841888	MT2A	3' exon	partial	LOC101824114	0.00105
NW_004801628.1:16184607-16184965	MT2A	3' exon	partial	mA.5142.1	0.0001
NW_004801734.1:1661364-1661872	MT2A	3' exon	partial	mA.13697.1	0.0006
NW_004801695.1:3351731-3352190	MT2A	3' exon	partial	mA.11413.1	0.0054
NW_004801680.1:4380717-4381077	MT2A	3' exon	partial	mA.10181.2	0.00145
NW_004801677.1:4385328-4385565	MT2A	3' exon	partial	mA.9956.1	0.0025
NW_004801640.1:8644385-8644640	MT2A	3' exon	partial	mA.6687.1	0.00015
NW_004801631.1:13198814-13199332	MT2A	3' exon	partial	mA.5548.1	0.0005
NW_004801667.1:7184544-7185019	MT2A	3' exon	partial	mA.9189.1	0.00045
NW_004801686.1:1059800-1059995	MT2A	3' exon	partial	mA.10571.1	0.0343
NW_004801746.1:3942987-3943457	MT2A	3' exon	partial	mA.14158.1	0.00025
NW_004801667.1:4422226-4422717	MT2A	3' exon	partial	mA.9182.1	0.00015
NW_004801630.1:9859362-9859501	MT2A	3' exon	partial	mA.5386.2	0.0001
NW_004801705.1:2014235-2014667	MT2A	3' exon	partial	mA.12223.1	0.00225
NW_004801735.1:2406778-2406890	MT2A	3' exon	partial	LOC101832666	0.0002
NW_004801681.1:921780-922272	MT2A	3' exon	partial	mA.10249.1	0.00105
NW_004803440.1:4601-4682	MT2A	3' exon	partial	mA.17724.1	2.67905
NW_004801607.1:683322-683835	MT2A	internal exon	partial	mA.1437.1	0.00115
NW_004801611.1:5345353-5345829	MT2A	internal exon	partial	mA.2306.1	0.0005
NW_004801734.1:1749882-1750305	MT2A	internal exon	partial	Lrrc30	0.00155
NW_004801638.1:7827234-7827349	MT2A	internal exon	partial	mA.6391.1	5e-05
NW_004801731.1:2277038-2277268	MT2A	internal exon	partial	mA.13620.6	0.0016
NW_004801675.1:3871072-3871322	MT2A	internal exon	partial	mA.9768.1	0.00015
NW_004801606.1:365302-365728	MT2A	internal exon	partial	mA.1136.2	0.00275
NW_004801678.1:7448826-7449017	MT2A	internal exon	partial	mA.10077.2	0.0019
NW_004801816.1:1063110-1063299	MT2A	internal exon	partial	Kif3b	0.0009
NW_004801667.1:9664911-9665394	MT2A	internal exon	partial	mA.9204.1	0.00035
NW_004801707.1:4858786-4859175	MT2A	internal exon	partial	mA.12422.1	0.0001
NW_004801730.1:2194029-2194359	MT2A	internal exon	partial	LOC101824903	0.00345
NW_004801672.1:5842996-5843523	MT2A	internal exon	partial	mA.9579.2	0.00035
NW_004802489.1:22660-23072	MT2A	internal exon	partial	mA.17532.1	0.07585
NW_004801734.1:5197662-5197713	MT2A	internal exon	partial	mA.13739.1	0.0009
NW_004801629.1:18040324-18040721	MT2A	internal exon	partial	mA.5260.1	0.0001
NW_004801693.1:6076678-6076856	MT2A	internal exon	partial	Nod2	0.0002
NW_004801619.1:22647695-22647783	MT2A	tagging	partial	Dusp18	0.00055
NW_004801626.1:3693836-3694153	MT2A	tagging	partial	mA.4774.1	0.0014
NW_004801649.1:5878987-5879434	MT2A	tagging	partial	mA.7695.1	0.00865
NW_004801691.1:8431918-8432002	MT2A	tagging	partial	mA.11111.1	0.2377
NW_004801723.1:739631-739788	MT2A	tagging	partial	mA.13220.1	0.00155
NW_004801775.1:435433-435875	MT2A	tagging	partial	Slc9a6	0.50555
NW_004801622.1:12961846-12962230	MT2A	tagging	partial	mA.4189.1	0.00095
NW_004801701.1:6383873-6383922	MT2A	tagging	partial	mA.11977.1	0.00075
NW_004801634.1:989563-989988	MT2A	tagging	partial	Zfp2	0.0097
NW_004801684.1:7040382-7040586	MT2A	tagging	partial	Rgs7	0.00265
NW_004801775.1:435231-435337	MT2A	tagging	partial	Slc9a6	0.50555
NW_004801681.1:2082526-2082609	MT2A	tagging	partial	Ankub1	0.00025
NW_004801792.1:1616691-1617075	MT2A	tagging	partial	mA.15702.1	0.01475
NW_004801677.1:10427452-10427596	MT2A	tagging	partial	mA.10011.1	0.0033
NW_004801734.1:3309012-3309338	MT2A	tagging	partial	mA.13712.1	0.00395
NW_004813431.1:302-435	MT2A	tagging	partial	Rsl1d1	686.763
NW_004801632.1:4424609-4424730	MT2A	tagging	partial	LOC101838658	0.00095
NW_004801724.1:3992934-3992987	MT2A	tagging	partial	Trappc12	0.0026
NW_004801613.1:24359971-24360168	MT2A	tagging	partial	Amhr2	0.00015
NW_004801656.1:12337513-12337909	MT2A	tagging	partial	mA.8326.1	0.0001
NW_004801622.1:21189357-21189409	MT2A	tagging	partial	Rec114	0.0014
NW_004801619.1:15928783-15929076	MT2A	tagging	partial	mA.3823.1	0.0028
NW_004801619.1:15952531-15952754	MT2A	tagging	partial	mA.3826.1	0.0029
NW_004801691.1:8400884-8401206	MT2A	tagging	partial	mA.11111.1	0.2377
NW_004801622.1:21189559-21190058	MT2A	tagging	partial	Rec114	0.0014
NW_004801606.1:4010263-4010635	MT2A	tagging	partial	mA.1193.1	0.00025
NW_004801680.1:6614033-6614156	MT2A	tagging	partial	mA.10215.1	0.00155
NW_004801694.1:6659387-6659822	MT2A	tagging	partial	mA.11349.1	0.0087
NW_004801626.1:3694166-3694233	MT2A	tagging	partial	mA.4774.1	0.0014
NW_004801734.1:3339980-3340354	MT2A	tagging	partial	mA.13714.1	0.0015
NW_004801681.1:2083117-2083444	MT2A	tagging	partial	Ankub1	0.00025
NW_004801735.1:2406895-2407111	MT2A	tagging	partial	LOC101832666	0.0002
NW_004801630.1:9859114-9859318	MT2A	tagging	partial	mA.5386.2	0.0001
NW_004801808.1:1931863-1932032	MT2A	tagging	partial	Ei24	0.00075
NW_004801680.1:6614184-6614232	MT2A	tagging	partial	mA.10215.1	0.00155
NW_004801728.1:3711554-3711596	MT2A	tagging	partial	mA.13445.1	0.003
NW_004801606.1:4020014-4020514	MT2A	tagging	partial	mA.1193.1	0.00175
NW_004801619.1:15952312-15952375	MT2A	tagging	partial	mA.3826.1	0.0029
NW_004801613.1:19038281-19038592	MT2A	tagging	partial	Slc38a4	0.0004
NW_004801607.1:13206627-13207187	MT2A	tagging	partial	LOC101825446	0.00345
NW_004801681.1:2082711-2082782	MT2A	tagging	partial	Ankub1	0.00025
NW_004801690.1:725014-725491	MT2A	tagging	partial	Mrpl50	0.0772
NW_004801619.1:17609043-17609248	MT2A	tagging	partial	mA.3848.1	0.0001
NW_004801673.1:1724179-1724299	MT2A	tagging	partial	mA.9631.1	0.0034
NW_004801611.1:5062339-5062820	MT2A	tagging	partial	mA.2303.1	0.00065
NW_004801682.1:9794184-9794618	MT2A	tagging	partial	mA.10379.1	0.0002
NW_004801628.1:9119498-9119583	MT2A	tagging	partial	mA.5086.1	0.0107
NW_004801613.1:21887654-21887715	MT2A	tagging	partial	mA.2822.1	0.00035
NW_004801685.1:412395-412551	MT2A	tagging	partial	mA.10517.6	0.04645
NW_004801606.1:4019517-4019639	MT2A	tagging	partial	mA.1193.1	0.00175
NW_004801669.1:1284334-1284497	MT2A	tagging	partial	mA.9326.1	0.00765
NW_004801728.1:3133546-3133949	MT2A	tagging	partial	mA.13442.3	0.01775
NW_004801624.1:5279143-5279520	MT2A	tagging	partial	mA.4479.3	0.00155
NW_004801677.1:10427010-10427103	MT2A	tagging	partial	mA.10011.1	0.0033
NW_004801640.1:8644671-8644792	MT2A	tagging	partial	mA.6687.1	0.00015
NW_004801691.1:8421736-8421941	MT2A	tagging	partial	mA.11111.1	0.2377
NW_004801645.1:1268950-1269122	MT2A	tagging	partial	Mrap2	0.0066
NW_004801673.1:710634-710990	MT2A	tagging	partial	mA.9618.1	0.04195
NW_004801654.1:8592914-8593330	MT2A	tagging	partial	mA.8195.3	0.01095
NW_004801769.1:2225665-2226112	MT2A	tagging	partial	LOC101843803	0.00055
NW_004801677.1:4385602-4385770	MT2A	tagging	partial	mA.9956.1	0.0025
NW_004801670.1:9471716-9471761	MT2A	tagging	partial	mA.9411.1	0.0008
NW_004801619.1:15922147-15922468	MT2A	tagging	partial	mA.3822.1	0.00115
NW_004801701.1:4613443-4613559	MT2A	tagging	partial	LOC106021934	0.00115
NW_004801606.1:38042477-38042925	MT2A	tagging	partial	mA.1372.3	0.0065
NW_004801701.1:4612987-4613102	MT2A	tagging	partial	LOC106021934	0.00115
NW_004801636.1:13488295-13488621	MT2A	tagging	partial	mA.6248.1	0.0039
NW_004801604.1:6284430-6284820	MTD	5' exon	full	mA.94.1	5e-05
NW_004801624.1:13099319-13099699	MTD	5' exon	full	Cep112	0.00115
NW_004801622.1:21199283-21199640	MTD	5' exon	full	Rec114	0.00075
NW_004801785.1:2504101-2504456	MTD	5' exon	full	Susd1	0.0003
NW_004801706.1:3559725-3560111	MTD	5' exon	full	mA.12342.1	0.0002
NW_004801670.1:10076297-10076692	MTD	5' exon	full	Znf280c	0.0003
NW_004801642.1:2957801-2958200	MTD	5' exon	full	mA.6975.1	0.00035
NW_004801723.1:3548997-3549381	MTD	5' exon	full	mA.13239.1	0.00065
NW_004801635.1:1513571-1513932	MTD	5' exon	full	Nck1	0.00365
NW_004801738.1:1931460-1931840	MTD	5' exon	full	mA.13864.1	0.00065
NW_004801729.1:5574730-5575143	MTD	5' exon	full	mA.13546.1	0.00045
NW_004801697.1:3420830-3421137	MTD	5' exon	full	mA.11665.1	0.0001
NW_004801650.1:2292190-2292314	MTD	5' exon	full	Slc30a9	0.0003
NW_004801691.1:738211-738628	MTD	5' exon	full	mA.10992.4	0.01185
NW_004801614.1:8385701-8386065	MTD	5' exon	full	Myh10	0.00015
NW_004801836.1:1234373-1234708	MTD	5' exon	full	mA.16573.1	0.0005
NW_004801621.1:20205589-20205995	MTD	5' exon	full	Nr3c1	0.0004
NW_004801625.1:16824301-16824698	MTD	5' exon	full	mA.4731.1	0.0011
NW_004801838.1:138651-139066	MTD	5' exon	full	Snrpn	0.019
NW_004801661.1:6314883-6315286	MTD	5' exon	full	mA.8757.1	0.00595
NW_004801631.1:3805352-3805775	MTD	5' exon	full	LOC106021225	0.00075
NW_004801671.1:8041029-8041432	MTD	5' exon	full	mA.9516.1	0.00095
NW_004801672.1:5848284-5848654	MTD	5' exon	full	mA.9579.1	0.0002
NW_004801623.1:20161988-20162350	MTD	5' exon	full	Tmem212	5e-05
NW_004801632.1:16822741-16823164	MTD	5' exon	full	St6gal1	0.0001
NW_004801623.1:18573417-18573800	MTD	5' exon	full	Skil	0.00115
NW_004801670.1:9411797-9412105	MTD	5' exon	full	Smarca1	5e-05
NW_004801817.1:1935109-1935510	MTD	5' exon	full	mA.16239.3	0.0194
NW_004801604.1:61418467-61418846	MTD	5' exon	full	mA.597.1	0
NW_004801614.1:23805936-23806272	MTD	5' exon	full	Fstl4	0.00025
NW_004801761.1:3642047-3642449	MTD	5' exon	full	mA.14709.4	0.00045
NW_004801698.1:4545604-4545959	MTD	5' exon	full	mA.11747.1	0.0003
NW_004801678.1:9425685-9426076	MTD	5' exon	full	Cacna2d3	0.00055
NW_004801611.1:15515512-15515918	MTD	5' exon	full	LOC101822906	0.0019
NW_004801805.1:710835-711248	MTD	5' exon	full	mA.16041.1	0.0054
NW_004801877.1:293123-293438	MTD	5' exon	full	mA.17095.1	0.00595
NW_004801669.1:11411189-11411519	MTD	5' exon	full	Epha3	5e-05
NW_004801627.1:14237462-14237846	MTD	5' exon	full	mA.4928.1	0.0001
NW_004801615.1:23063680-23064072	MTD	5' exon	full	mA.3294.1	0.0005
NW_004801719.1:4345845-4346282	MTD	5' exon	full	mA.12915.1	0.0001
NW_004801612.1:6876159-6876509	MTD	5' exon	full	Prex2	0.0001
NW_004801737.1:4402731-4403124	MTD	5' exon	full	mA.13837.1	0.0002
NW_004801702.1:1964290-1964691	MTD	5' exon	full	mA.12036.1	0.00035
NW_004801722.1:2788039-2788331	MTD	5' exon	full	mA.13185.2	0.00025
NW_004801621.1:17274643-17274977	MTD	5' exon	full	Tcerg1	0
NW_004801609.1:8877742-8878164	MTD	5' exon	full	Atg7	0.00305
NW_004801625.1:15074879-15075249	MTD	5' exon	full	mA.4724.1	0.0001
NW_004801710.1:4345885-4346289	MTD	5' exon	full	Dnah7	0.00065
NW_004801604.1:67374214-67374627	MTD	5' exon	full	mA.626.1	0.0001
NW_004801690.1:5142476-5142838	MTD	5' exon	full	Tomm5	0.0001
NW_004801690.1:9234030-9234423	MTD	5' exon	full	mA.10987.1	5e-05
NW_004801722.1:6114998-6115391	MTD	5' exon	full	mA.13208.1	0.0002
NW_004801706.1:8448086-8448487	MTD	5' exon	full	mA.12389.2	0.00015
NW_004801606.1:31582271-31582681	MTD	5' exon	full	mA.1327.1	0.0002
NW_004801617.1:13466475-13466867	MTD	5' exon	full	mA.3534.2	5e-05
NW_004801721.1:4126502-4126909	MTD	5' exon	full	mA.13113.1	0.0002
NW_004801719.1:2555363-2555753	MTD	5' exon	full	Ptprr	0.00015
NW_004801682.1:9692592-9692942	MTD	5' exon	full	Pdzd2	0.00055
NW_004801610.1:9798981-9799377	MTD	5' exon	full	mA.2116.1	5e-05
NW_004801645.1:9523195-9523571	MTD	5' exon	full	Slc17a5	0.0002
NW_004801604.1:66995610-66996016	MTD	5' exon	full	mA.624.1	0
NW_004801630.1:3723570-3723928	MTD	5' exon	full	mA.5324.3	0.0021
NW_004801614.1:14240202-14240618	MTD	5' exon	full	Znf287	0
NW_004801608.1:24430365-24430771	MTD	5' exon	full	mA.1764.1	0.0002
NW_004801658.1:8547676-8548051	MTD	5' exon	full	Cnnm4	0.00075
NW_004801605.1:51862778-51863190	MTD	5' exon	full	LOC101836075	0
NW_004801613.1:12828554-12828942	MTD	5' exon	full	mA.2721.1	0.0002
NW_004801610.1:7587132-7587490	MTD	5' exon	full	Gmpr	0.0003
NW_004801671.1:3509939-3510321	MTD	5' exon	full	Synrg	0.00035
NW_004801678.1:9194909-9195292	MTD	5' exon	full	Cacna2d3	0.0012
NW_004801695.1:7684431-7684835	MTD	5' exon	full	Pcca	0.0006
NW_004801713.1:726429-726815	MTD	5' exon	full	mA.12611.1	0.0006
NW_004801691.1:2769392-2769788	MTD	5' exon	full	mA.11026.1	0.0039
NW_004801731.1:1183922-1184284	MTD	5' exon	full	mA.13607.3	0.0139
NW_004801649.1:1533121-1533526	MTD	5' exon	full	LOC106021485	0.0112
NW_004801623.1:18043704-18044085	MTD	5' exon	full	Lrriq4	0.00195
NW_004801734.1:2461295-2461657	MTD	5' exon	full	L3mbtl4	0.00035
NW_004801611.1:21045737-21046148	MTD	5' exon	full	mA.2393.1	0.0003
NW_004801637.1:19096658-19097058	MTD	5' exon	full	Scp2d1	0.0002
NW_004801654.1:683052-683465	MTD	5' exon	full	Cpne4	0.0035
NW_004801752.1:3036954-3037329	MTD	5' exon	full	Itgb1	0.00085
NW_004801636.1:13462-13866	MTD	5' exon	full	B3gat2	0.3016
NW_004801620.1:22987458-22987845	MTD	5' exon	full	mA.3992.1	5e-05
NW_004801610.1:16557681-16558088	MTD	5' exon	full	mA.2155.1	0.00075
NW_004801619.1:3431902-3432298	MTD	5' exon	full	mA.3779.1	0.00025
NW_004801652.1:6755585-6755952	MTD	5' exon	full	mA.7969.4	0.0001
NW_004801611.1:15101944-15102241	MTD	5' exon	full	Tusc3	5e-05
NW_004801658.1:6933310-6933685	MTD	5' exon	full	mA.8483.1	0.00015
NW_004801618.1:793516-793844	MTD	5' exon	full	Tp53bp1	0.00045
NW_004801686.1:7020829-7021102	MTD	5' exon	full	Dapk1	0.0006
NW_004801620.1:17415661-17416040	MTD	5' exon	full	mA.3962.1	0
NW_004801716.1:6094245-6094566	MTD	5' exon	full	mA.12786.1	0.00015
NW_004801691.1:6182629-6183014	MTD	5' exon	full	mA.11086.1	0.0001
NW_004801654.1:10417418-10417826	MTD	5' exon	full	mA.8221.1	0.0002
NW_004801614.1:8246797-8247148	MTD	5' exon	full	Ndel1	0.0003
NW_004801620.1:19596676-19596980	MTD	5' exon	full	mA.3966.1	0.00025
NW_004801737.1:2425554-2425902	MTD	5' exon	full	Zhx3	0.00015
NW_004801631.1:13039247-13039645	MTD	5' exon	full	Nme7	0.0002
NW_004801605.1:5736765-5737171	MTD	5' exon	full	Fsip1	0.0022
NW_004801755.1:3955228-3955637	MTD	5' exon	full	Lrrd1	0.00095
NW_004801611.1:6385337-6385708	MTD	5' exon	full	mA.2308.1	0.00015
NW_004801640.1:15722095-15722433	MTD	5' exon	full	Tmtc1	5e-05
NW_004801606.1:11486377-11486594	MTD	5' exon	full	Fhod3	0.00195
NW_004801631.1:5625063-5625440	MTD	5' exon	full	Tor3a	0.0001
NW_004801620.1:21823389-21823780	MTD	5' exon	full	Tank	0
NW_004803853.1:2853-3257	MTD	5' exon	full	LOC101840444	0.3919
NW_004801642.1:3752290-3752704	MTD	5' exon	full	Slc16a10	0.0003
NW_004801651.1:4511980-4512393	MTD	5' exon	full	mA.7825.3	0.0012
NW_004801705.1:2098310-2098712	MTD	5' exon	full	mA.12225.1	0.00015
NW_004801679.1:2939788-2940157	MTD	5' exon	full	Gab1	0.0076
NW_004801631.1:8439227-8439625	MTD	5' exon	full	Tnr	0.0012
NW_004801700.1:9052872-9053248	MTD	5' exon	full	LOC101837085	0.0002
NW_004801631.1:14847250-14847587	MTD	5' exon	full	Mael	0.00025
NW_004801865.1:521541-521910	MTD	5' exon	full	mA.16999.2	0.0085
NW_004801671.1:2101591-2101870	MTD	5' exon	full	mA.9448.1	0.00825
NW_004801713.1:3054902-3055304	MTD	5' exon	full	Tmco4	0.00055
NW_004801628.1:12863280-12863652	MTD	5' exon	full	mA.5113.1	0.00055
NW_004801610.1:12804128-12804521	MTD	5' exon	full	mA.2138.1	0.00015
NW_004801666.1:6799749-6800124	MTD	5' exon	full	Fhit	0.00025
NW_004801622.1:12969359-12969768	MTD	5' exon	full	mA.4189.1	0.0001
NW_004804403.1:8646-9042	MTD	5' exon	full	mA.17899.1	0.2402
NW_004802195.1:7345-7734	MTD	5' exon	full	mA.17472.2	5.61435
NW_004801624.1:15366538-15366779	MTD	5' exon	full	mA.4604.1	0.0006
NW_004801773.1:1832223-1832664	MTD	5' exon	full	Dnah11	0.0009
NW_004801634.1:14309831-14310221	MTD	5' exon	full	mA.5921.1	0.0004
NW_004801631.1:18517704-18518085	MTD	5' exon	full	Ddr2	0
NW_004801695.1:2722271-2722682	MTD	5' exon	full	Gpc6	0.00035
NW_004801705.1:675261-675657	MTD	5' exon	full	Piwil1	0.0209
NW_004801681.1:8870556-8870976	MTD	5' exon	full	LOC101829900	0.00015
NW_004801673.1:2550053-2550437	MTD	5' exon	full	mA.9640.2	0.01985
NW_004801737.1:2916744-2917161	MTD	5' exon	full	LOC101825515	0.0012
NW_004801605.1:47043333-47043730	MTD	5' exon	full	mA.1050.1	0
NW_004801681.1:2477341-2477752	MTD	5' exon	full	mA.10262.1	0.0008
NW_004801610.1:19594911-19595308	MTD	5' exon	full	Mylk4	0.0001
NW_004801646.1:1035821-1036190	MTD	5' exon	full	Dscam	0.00655
NW_004801742.1:2931225-2931620	MTD	5' exon	full	mA.14018.1	0.00035
NW_004801724.1:1517759-1518111	MTD	5' exon	full	mA.13294.1	0.0006
NW_004801610.1:11133801-11134204	MTD	5' exon	full	Hivep1	0.00165
NW_004801643.1:4063842-4064174	MTD	5' exon	full	mA.7113.2	0.00035
NW_004801640.1:13126301-13126647	MTD	5' exon	full	mA.6736.1	0.00025
NW_004801605.1:53816329-53816701	MTD	5' exon	full	mA.1105.1	0
NW_004801699.1:4689010-4689404	MTD	5' exon	full	Card11	0.00205
NW_004801695.1:6714183-6714506	MTD	5' exon	full	Dock9	5e-05
NW_004801640.1:4701796-4702195	MTD	5' exon	full	Rerg	0.00065
NW_004801634.1:16084864-16085263	MTD	5' exon	full	mA.5928.1	5e-05
NW_004801734.1:1039450-1039823	MTD	5' exon	full	Ptprm	0.04785
NW_004801692.1:7119080-7119463	MTD	5' exon	full	mA.11151.1	0.0004
NW_004801630.1:9871922-9872312	MTD	5' exon	full	mA.5386.1	0.00035
NW_004801681.1:7110146-7110535	MTD	5' exon	full	mA.10315.1	0.0001
NW_004801654.1:12716586-12716901	MTD	5' exon	full	Rbms3	0.00115
NW_004801608.1:17981415-17981797	MTD	5' exon	full	Fuca2	5e-05
NW_004801643.1:1769097-1769429	MTD	5' exon	full	mA.7088.1	0.0008
NW_004801673.1:2787938-2788291	MTD	5' exon	full	Fbxl17	0.0002
NW_004801604.1:3615559-3615953	MTD	5' exon	full	mA.70.1	0.00215
NW_004801636.1:55907-56217	MTD	5' exon	full	B3gat2	1.361
NW_004801676.1:2479806-2480211	MTD	5' exon	full	mA.9820.1	0.0003
NW_004801686.1:3343132-3343461	MTD	5' exon	full	mA.10603.1	0.0004
NW_004801695.1:3935346-3935721	MTD	5' exon	full	mA.11420.1	0.00025
NW_004801631.1:6634506-6634911	MTD	5' exon	full	mA.5489.1	0.0002
NW_004801742.1:2895692-2896016	MTD	5' exon	full	mA.14017.1	0.0002
NW_004801723.1:1670358-1670784	MTD	5' exon	full	mA.13234.1	0.0016
NW_004801638.1:16431365-16431731	MTD	5' exon	full	Matn2	0
NW_004801617.1:23544287-23544680	MTD	5' exon	full	mA.3573.1	0.0002
NW_004801608.1:22712335-22712721	MTD	5' exon	full	mA.1736.1	5e-05
NW_004801686.1:5936516-5936869	MTD	5' exon	full	LOC101833002	0.0001
NW_004801706.1:6343302-6343653	MTD	5' exon	full	LOC106022000	0.0001
NW_004801877.1:837854-838227	MTD	5' exon	full	Qki	0.0042
NW_004801610.1:2347439-2347825	MTD	5' exon	full	Shc3	0.00125
NW_004801680.1:7712419-7712799	MTD	5' exon	full	mA.10230.1	0.0001
NW_004801642.1:14097167-14097481	MTD	5' exon	full	mA.7043.1	0.0003
NW_004801686.1:6848758-6849144	MTD	5' exon	full	mA.10648.1	0.0004
NW_004801630.1:623163-623558	MTD	5' exon	full	mA.5290.1	0.00055
NW_004801649.1:13351301-13351635	MTD	5' exon	full	mA.7721.1	0.0004
NW_004801695.1:2016839-2017235	MTD	5' exon	full	mA.11406.1	0.00025
NW_004801648.1:13124217-13124601	MTD	5' exon	full	Mbtps2	5e-05
NW_004801611.1:17525579-17525980	MTD	5' exon	full	mA.2374.1	0.00035
NW_004801734.1:1687849-1688225	MTD	5' exon	full	mA.13697.1	0.00045
NW_004801647.1:6626180-6626573	MTD	5' exon	full	mA.7542.1	0.00015
NW_004801614.1:15830756-15831158	MTD	5' exon	full	mA.3076.1	0.0002
NW_004801628.1:9735972-9736375	MTD	5' exon	full	mA.5093.1	0.0001
NW_004801632.1:16362404-16362783	MTD	5' exon	full	mA.5695.1	0.00025
NW_004801618.1:6716577-6716984	MTD	5' exon	full	mA.3643.1	0.0003
NW_004801642.1:3201874-3202220	MTD	5' exon	full	mA.6980.1	0.00105
NW_004801655.1:1828124-1828513	MTD	5' exon	full	Rasef	0.02745
NW_004801655.1:1826786-1827134	MTD	5' exon	full	mA.8234.1	0.0004
NW_004801614.1:11031521-11031895	MTD	5' exon	full	Dnah9	0.0002
NW_004801646.1:819128-819535	MTD	5' exon	full	mA.7393.1	0.0007
NW_004801631.1:7907827-7908224	MTD	5' exon	full	Pappa2	0.00025
NW_004801848.1:461154-461554	MTD	5' exon	full	mA.16794.2	0.01355
NW_004801606.1:13891378-13891748	MTD	5' exon	full	Ccdc178	0.0002
NW_004801732.1:3924992-3925389	MTD	5' exon	full	Zcchc16	0.0032
NW_004801632.1:6878140-6878369	MTD	5' exon	full	mA.5638.1	0.0001
NW_004801610.1:1072338-1072742	MTD	5' exon	full	mA.2039.1	0.0015
NW_004801702.1:4915941-4916289	MTD	5' exon	full	Limk1	0.0001
NW_004801612.1:18652210-18652537	MTD	5' exon	full	LOC106020850	0.0001
NW_004801697.1:8586844-8587240	MTD	5' exon	full	mA.11708.3	0.0005
NW_004801606.1:20201791-20202179	MTD	5' exon	full	mA.1265.1	0.0003
NW_004801859.1:698925-699305	MTD	5' exon	full	mA.16900.1	0.00185
NW_004801604.1:34272525-34272957	MTD	5' exon	full	mA.292.1	5e-05
NW_004801792.1:2455622-2456021	MTD	5' exon	full	Grk5	0.0003
NW_004801725.1:881191-881586	MTD	5' exon	full	mA.13329.1	0.0011
NW_004801734.1:4695964-4696376	MTD	5' exon	full	mA.13729.1	0.00015
NW_004801695.1:6090544-6090957	MTD	5' exon	full	Farp1	0.00035
NW_004801640.1:13355070-13355442	MTD	5' exon	full	mA.6743.3	0.0006
NW_004801620.1:13362302-13362694	MTD	5' exon	full	Fmnl2	0.0001
NW_004801773.1:1729458-1729837	MTD	5' exon	full	Cdca7l	0.0052
NW_004801616.1:5086269-5086639	MTD	5' exon	full	mA.3342.1	0.00035
NW_004801674.1:4784722-4785019	MTD	5' exon	full	mA.9699.1	0.0001
NW_004801678.1:8395633-8395976	MTD	5' exon	full	mA.10085.1	0.0001
NW_004801618.1:1531514-1531885	MTD	5' exon	full	mA.3614.1	0.0004
NW_004801606.1:23832431-23832841	MTD	5' exon	full	mA.1284.1	0
NW_004801645.1:15437498-15437881	MTD	5' exon	full	Tex9	0
NW_004801646.1:10190108-10190518	MTD	5' exon	full	mA.7499.1	5e-05
NW_004801694.1:6793622-6794001	MTD	5' exon	full	Pik3cd	0.00065
NW_004801684.1:1498575-1498951	MTD	5' exon	full	Dnah14	0.0005
NW_004801671.1:99610-99752	MTD	5' exon	full	Ppm1e	0.00685
NW_004801657.1:1398559-1398882	MTD	5' exon	full	mA.8344.1	0.00945
NW_004801717.1:640854-641272	MTD	5' exon	full	mA.12798.1	0.00155
NW_004801627.1:6464667-6465076	MTD	5' exon	full	Pecr	0.0018
NW_004801697.1:5911100-5911476	MTD	5' exon	full	Slc16a7	0.0008
NW_004801811.1:2183447-2183817	MTD	5' exon	full	Wnk3	0.00015
NW_004801680.1:9591054-9591416	MTD	5' exon	full	Abhd17c	0.001
NW_004801610.1:18143188-18143570	MTD	5' exon	full	mA.2165.1	0.0002
NW_004801609.1:10349567-10349946	MTD	5' exon	full	mA.1950.1	0.0001
NW_004801654.1:8986874-8987189	MTD	5' exon	full	LOC106021533	0.0003
NW_004801678.1:6463947-6464335	MTD	5' exon	full	Slmap	0.0028
NW_004801613.1:6145096-6145428	MTD	5' exon	full	LOC106020869	0.00015
NW_004801713.1:6102762-6103162	MTD	5' exon	full	Fhad1	5e-05
NW_004801620.1:20928923-20929308	MTD	5' exon	full	mA.3983.1	0.0007
NW_004801617.1:17930142-17930535	MTD	5' exon	full	mA.3562.1	0.00035
NW_004801838.1:189897-190302	MTD	5' exon	full	mA.16602.1	0.01625
NW_004801646.1:11890788-11891176	MTD	5' exon	full	mA.7507.1	0.0003
NW_004801777.1:781084-781445	MTD	5' exon	full	mA.15153.1	0.0006
NW_004801654.1:10137942-10138237	MTD	5' exon	full	Osbpl10	0.00055
NW_004801754.1:399108-399437	MTD	5' exon	full	mA.14453.1	0.0046
NW_004801727.1:3815402-3815798	MTD	5' exon	full	Mpdz	0.0006
NW_004801694.1:6300657-6300955	MTD	5' exon	full	mA.11341.1	0.00035
NW_004801618.1:11651649-11652025	MTD	5' exon	full	mA.3702.1	0.00235
NW_004801631.1:10951954-10952344	MTD	5' exon	full	Dnm3	0.00045
NW_004801694.1:6392131-6392549	MTD	5' exon	full	mA.11344.1	0.00215
NW_004801686.1:5719986-5720386	MTD	5' exon	full	mA.10630.1	0.00025
NW_004801730.1:1739387-1739776	MTD	5' exon	full	Lrguk	0.0014
NW_004801624.1:9056883-9057242	MTD	5' exon	full	mA.4557.1	0.0002
NW_004801611.1:4395132-4395459	MTD	5' exon	full	mA.2290.1	0.00255
NW_004801690.1:4265195-4265611	MTD	5' exon	full	mA.10912.1	0.00015
NW_004801617.1:3453511-3453915	MTD	5' exon	full	mA.3436.1	0.0007
NW_004801640.1:3944894-3945297	MTD	5' exon	full	mA.6662.1	0.0002
NW_004801736.1:3764846-3765029	MTD	5' exon	partial	mA.13784.1	0.00055
NW_004801753.1:1481246-1481666	MTD	5' exon	partial	mA.14416.1	0.00455
NW_004801613.1:17631881-17632200	MTD	5' exon	partial	mA.2750.1	0
NW_004801739.1:4469951-4470288	MTD	5' exon	partial	mA.13915.1	0.0007
NW_004801662.1:12268149-12268521	MTD	5' exon	partial	Immt	0.0001
NW_004801628.1:10469392-10469754	MTD	5' exon	partial	mA.5096.1	0.001
NW_004801628.1:17586556-17586955	MTD	5' exon	partial	Slc29a3	5e-05
NW_004801888.1:502640-502983	MTD	5' exon	partial	mA.17188.2	0.00265
NW_004801628.1:3486186-3486286	MTD	5' exon	partial	mA.5029.1	0.00125
NW_004801652.1:12541256-12541408	MTD	5' exon	partial	Hmgxb3	0.0001
NW_004801673.1:10294026-10294429	MTD	5' exon	partial	mA.9668.1	0.0006
NW_004801628.1:3224325-3224543	MTD	5' exon	partial	Pcbp3	0.0002
NW_004801672.1:5714110-5714519	MTD	5' exon	partial	mA.9578.1	0.0115
NW_004801646.1:5756139-5756469	MTD	5' exon	partial	mA.7444.1	0.00255
NW_004801746.1:128244-128644	MTD	5' exon	partial	mA.14116.1	0.02205
NW_004801660.1:945797-945892	MTD	5' exon	partial	mA.8655.1	0.01085
NW_004801695.1:5101847-5102099	MTD	5' exon	partial	mA.11437.1	0.0006
NW_004801606.1:6119495-6119812	MTD	5' exon	partial	mA.1220.1	0.00025
NW_004801611.1:20621460-20621841	MTD	5' exon	partial	Sorbs2	0.0004
NW_004801749.1:2582133-2582540	MTD	5' exon	partial	mA.14251.1	0.00045
NW_004801628.1:3397621-3398030	MTD	5' exon	partial	mA.5025.2	0.01415
NW_004801875.1:86949-87303	MTD	5' exon	partial	Rnase1	0.00365
NW_004801631.1:14413212-14413613	MTD	5' exon	partial	mA.5559.1	5e-05
NW_004801671.1:9223022-9223276	MTD	5' exon	partial	LOC101829442	0.01125
NW_004801737.1:2709973-2710363	MTD	5' exon	partial	mA.13830.3	0.0001
NW_004801628.1:10470827-10471193	MTD	5' exon	partial	mA.5096.1	0.001
NW_004801605.1:21105137-21105537	MTD	5' exon	partial	mA.926.1	5e-05
NW_004801620.1:19846559-19846945	MTD	5' exon	partial	mA.3970.1	0.0004
NW_004801640.1:15403098-15403509	MTD	5' exon	partial	mA.6768.1	0.0006
NW_004801682.1:5819597-5819938	MTD	5' exon	partial	mA.10362.1	0.00985
NW_004801871.1:386426-386634	MTD	5' exon	partial	mA.17050.1	0.0013
NW_004801611.1:2588429-2588748	MTD	5' exon	partial	Plekha2	0.00015
NW_004801604.1:1968572-1968958	MTD	5' exon	partial	mA.52.1	0.0056
NW_004801628.1:8455998-8456405	MTD	5' exon	partial	mA.5077.1	0.00295
NW_004801634.1:812840-813145	MTD	5' exon	partial	mA.5842.1	0.01625
NW_004801608.1:18574055-18574270	MTD	5' exon	partial	Utrn	0.0003
NW_004801646.1:1554248-1554659	MTD	5' exon	partial	mA.7398.1	0.00805
NW_004801608.1:6562281-6562507	MTD	5' exon	partial	mA.1651.1	5e-05
NW_004801649.1:9035286-9035456	MTD	5' exon	partial	Tek	0.0002
NW_004801740.1:533808-534056	MTD	5' exon	partial	Ndufs4	0.0637
NW_004801604.1:46545191-46545592	MTD	5' exon	partial	LOC106021056	0.00025
NW_004801615.1:7021482-7021866	MTD	5' exon	partial	LOC106020942	0.02835
NW_004801667.1:10405011-10405435	MTD	5' exon	partial	mA.9212.1	0.0002
NW_004801731.1:379410-379792	MTD	5' exon	partial	mA.13603.1	0.1039
NW_004801624.1:6699285-6699665	MTD	5' exon	partial	mA.4525.2	0.0017
NW_004801610.1:15627195-15627536	MTD	5' exon	partial	LOC106020814	0.0016
NW_004801766.1:1875283-1876483	MTD	5' exon	partial	Fgf6	0.00115
NW_004801659.1:8018883-8019058	MTD	5' exon	partial	Smad3	0.0003
NW_004801628.1:19096470-19096869	MTD	5' exon	partial	mA.5173.1	0.00135
NW_004801855.1:609117-609285	MTD	5' exon	partial	Calr3	0.0012
NW_004801673.1:2159012-2159380	MTD	5' exon	partial	Fer	0.00285
NW_004801613.1:18435014-18436154	MTD	5' exon	partial	mA.2760.1	0.00045
NW_004801680.1:5626986-5627347	MTD	5' exon	partial	Sema4b	5e-05
NW_004801805.1:508500-508860	MTD	5' exon	partial	Fermt2	0.00145
NW_004801724.1:591223-591624	MTD	5' exon	partial	Asap2	0.002
NW_004801775.1:1900470-1900847	MTD	5' exon	partial	mA.15129.1	0.00695
NW_004801674.1:9396866-9397271	MTD	5' exon	partial	mA.9744.1	0.00065
NW_004801611.1:2968666-2968970	MTD	5' exon	partial	mA.2266.1	0.0079
NW_004801646.1:2102064-2102470	MTD	5' exon	partial	mA.7407.1	0.0022
NW_004801668.1:5318327-5318709	MTD	5' exon	partial	mA.9272.1	0.00335
NW_004801686.1:8933149-8933404	MTD	5' exon	partial	mA.10669.1	0.00135
NW_004801621.1:9774083-9774412	MTD	5' exon	partial	Fam170a	0.0001
NW_004801682.1:9611038-9611433	MTD	5' exon	partial	Pdzd2	0.00015
NW_004801691.1:6149150-6149533	MTD	5' exon	partial	mA.11085.1	0.00095
NW_004801689.1:4601920-4602165	MTD	5' exon	partial	mA.10836.1	0.00045
NW_004801701.1:4387005-4387144	MTD	5' exon	partial	mA.11919.1	0.00035
NW_004801609.1:20472552-20472956	MTD	5' exon	partial	mA.2005.1	0.0001
NW_004801634.1:15966347-15966743	MTD	5' exon	partial	Wwc1	5e-05
NW_004801734.1:5545885-5546288	MTD	5' exon	partial	mA.13745.1	0.0002
NW_004801692.1:8061899-8062288	MTD	5' exon	partial	Ubxn2a	0.0001
NW_004801672.1:5712512-5712914	MTD	5' exon	partial	mA.9578.1	0.0115
NW_004801646.1:4507025-4507182	MTD	5' exon	partial	mA.7435.1	0.00095
NW_004801723.1:1572609-1572933	MTD	5' exon	partial	Lamtor3	0.00025
NW_004801776.1:900127-900539	MTD	5' exon	partial	mA.15141.1	0.0028
NW_004801608.1:29723848-29724231	MTD	5' exon	partial	Sytl3	0.00315
NW_004801658.1:5545133-5545531	MTD	5' exon	partial	mA.8468.1	0.0002
NW_004801604.1:18838323-18838732	MTD	5' exon	partial	Sorbs1	0.0003
NW_004801628.1:631715-632075	MTD	5' exon	partial	Dnah8	0.0056
NW_004801620.1:12756278-12756506	MTD	5' exon	partial	mA.3951.2	0.0002
NW_004801645.1:12709101-12709437	MTD	5' exon	partial	Gnb5	0.0001
NW_004801657.1:7898519-7898699	MTD	5' exon	partial	LOC101836811	0.00025
NW_004801689.1:5177508-5177618	MTD	5' exon	partial	mA.10841.1	0.00015
NW_004801681.1:1087789-1087936	MTD	5' exon	partial	mA.10250.1	0.0572
NW_004801606.1:6118951-6119162	MTD	5' exon	partial	mA.1220.1	0.00025
NW_004801731.1:1535528-1535936	MTD	5' exon	partial	mA.13611.1	0.0065
NW_004801605.1:11511847-11512047	MTD	5' exon	partial	Aven	5e-05
NW_004801691.1:8485615-8485894	MTD	5' exon	partial	mA.11112.1	0.02145
NW_004801632.1:18531301-18531501	MTD	5' exon	partial	Vps8	0
NW_004801691.1:1482813-1483232	MTD	5' exon	partial	mA.11005.1	0.00045
NW_004801691.1:1935813-1936188	MTD	5' exon	partial	mA.11011.1	0.00035
NW_004801640.1:13454458-13454803	MTD	5' exon	partial	Itpr2	0.00035
NW_004801604.1:963013-963394	MTD	5' exon	partial	Atrnl1	0.0005
NW_004801836.1:684878-685254	MTD	5' exon	partial	Raver2	0.00475
NW_004801626.1:10670382-10670783	MTD	5' exon	partial	mA.4814.1	0.0005
NW_004801681.1:1941060-1941430	MTD	5' exon	partial	Wwtr1	0.00285
NW_004801613.1:6775622-6775949	MTD	5' exon	partial	Arhgap8	0.00045
NW_004801614.1:13491089-13491483	MTD	5' exon	partial	mA.3047.1	0.00015
NW_004801614.1:22855902-22856287	MTD	5' exon	partial	mA.3160.1	0.0017
NW_004801656.1:1808834-1809042	MTD	5' exon	partial	mA.8278.3	0.0002
NW_004801616.1:5840056-5840406	MTD	5' exon	partial	Thap6	0.00025
NW_004801606.1:5895251-5895652	MTD	5' exon	partial	mA.1214.1	0.00075
NW_004801691.1:2423485-2423852	MTD	5' exon	partial	Coro1c	0.00015
NW_004801716.1:5768103-5768514	MTD	5' exon	partial	mA.12784.1	0.008
NW_004801628.1:3923766-3924140	MTD	5' exon	partial	Slc5a4	0.0006
NW_004801667.1:4290053-4290465	MTD	5' exon	partial	mA.9180.1	0.00675
NW_004801649.1:1300024-1300238	MTD	5' exon	partial	Dennd4c	0.0062
NW_004801645.1:4333659-4334063	MTD	5' exon	partial	Bckdhb	0.00015
NW_004801628.1:4919239-4919465	MTD	5' exon	partial	mA.5060.1	0.0002
NW_004801614.1:14766808-14767089	MTD	5' exon	partial	LOC101826951	0
NW_004801694.1:7902259-7902311	MTD	5' exon	partial	LOC101832046	5e-05
NW_004801639.1:1507525-1507731	MTD	5' exon	partial	mA.6507.1	0.00295
NW_004801742.1:4069463-4069844	MTD	5' exon	partial	mA.14037.1	0.0003
NW_004801630.1:10885404-10885766	MTD	5' exon	partial	Slc25a26	0.0001
NW_004801652.1:9032854-9033078	MTD	5' exon	partial	mA.7989.1	0.0003
NW_004802806.1:17343-17493	MTD	5' exon	partial	mA.17598.1	0.20585
NW_004801628.1:4918901-4919074	MTD	5' exon	partial	mA.5060.1	0.0002
NW_004801693.1:7817181-7817462	MTD	5' exon	partial	LOC101828738	0.00035
NW_004801684.1:4623813-4624029	MTD	5' exon	partial	Efcab2	0.00045
NW_004801624.1:7230301-7230727	MTD	5' exon	partial	mA.4532.1	0.00015
NW_004801730.1:3115493-3115787	MTD	5' exon	partial	mA.13575.1	0.0067
NW_004801622.1:13300663-13301058	MTD	5' exon	partial	Dixdc1	0.0001
NW_004801624.1:16040081-16040479	MTD	5' exon	partial	March10	0.00045
NW_004801754.1:334658-335030	MTD	5' exon	partial	Dlg5	0.0078
NW_004801728.1:1013104-1013490	MTD	5' exon	partial	mA.13427.1	0.0019
NW_004801679.1:6586952-6587343	MTD	5' exon	partial	Nr3c2	0.0001
NW_004801799.1:1112903-1113229	MTD	3' exon	full	Aurkc	0.00085
NW_004801664.1:11465791-11466051	MTD	3' exon	full	LOC106021619	0.00015
NW_004801670.1:1393516-1393745	MTD	3' exon	full	LOC106021654	0.0017
NW_004801639.1:6716980-6717358	MTD	3' exon	full	mA.6554.4	0.0003
NW_004801605.1:50569987-50570218	MTD	3' exon	full	LOC106021969	0
NW_004801616.1:15539473-15539832	MTD	3' exon	partial	mA.3387.1	0.0001
NW_004801686.1:8204819-8205216	MTD	3' exon	partial	Fancc	0.00035
NW_004801617.1:10267555-10267875	MTD	3' exon	partial	mA.3497.1	0.00035
NW_004801665.1:783257-783398	MTD	3' exon	partial	Ap4s1	0.0004
NW_004801604.1:2205059-2205393	MTD	3' exon	partial	mA.60.1	0.0003
NW_004801614.1:23755308-23755708	MTD	3' exon	partial	mA.3172.1	5e-05
NW_004801653.1:7232799-7233147	MTD	3' exon	partial	mA.8055.1	0.00045
NW_004801606.1:33017461-33017851	MTD	3' exon	partial	mA.1330.2	0.0002
NW_004801665.1:1095949-1096283	MTD	3' exon	partial	mA.9012.2	0.0071
NW_004801742.1:1655249-1655649	MTD	3' exon	partial	mA.13992.3	0.011
NW_004801744.1:340194-340590	MTD	3' exon	partial	Adcy1	0.05655
NW_004801734.1:1764473-1764796	MTD	3' exon	partial	Lrrc30	0.0516
NW_004801613.1:25161678-25161740	MTD	3' exon	partial	mA.2873.1	5e-05
NW_004801686.1:4938386-4938527	MTD	3' exon	partial	mA.10623.1	0.00025
NW_004801611.1:16636656-16636862	MTD	3' exon	partial	mA.2363.1	0.0001
NW_004801691.1:1951216-1951553	MTD	3' exon	partial	mA.11012.1	0.0008
NW_004801691.1:2272295-2272435	MTD	3' exon	partial	mA.11017.1	0.0003
NW_004801609.1:16290004-16290395	MTD	3' exon	partial	mA.1978.4	5e-05
NW_004801630.1:16176158-16176487	MTD	3' exon	partial	mA.5420.1	0.00175
NW_004801606.1:4019137-4019385	MTD	3' exon	partial	mA.1193.1	0.00175
NW_004801721.1:2548803-2549109	MTD	3' exon	partial	mA.13095.2	0.00725
NW_004801702.1:7829042-7829149	MTD	3' exon	partial	Ppp1r35	0.00395
NW_004801635.1:14744327-14744732	MTD	3' exon	partial	C8b	0.00095
NW_004801737.1:4350764-4351113	MTD	3' exon	partial	mA.13837.2	0.00225
NW_004801618.1:20934638-20935007	MTD	3' exon	partial	mA.3740.1	5e-05
NW_004801632.1:17405733-17406078	MTD	3' exon	partial	mA.5708.1	0.00025
NW_004801746.1:823171-823563	MTD	3' exon	partial	Pde10a	0.00135
NW_004801642.1:6265168-6265534	MTD	3' exon	partial	mA.7002.1	0.0002
NW_004801749.1:2325628-2325992	MTD	3' exon	partial	mA.14247.1	0.0005
NW_004801613.1:25160930-25161266	MTD	3' exon	partial	mA.2873.1	5e-05
NW_004801783.1:113098-113394	MTD	3' exon	partial	Hpcal1	0.01845
NW_004801656.1:2475441-2475800	MTD	3' exon	partial	Galntl6	0.0005
NW_004801673.1:2539652-2540059	MTD	3' exon	partial	mA.9640.4	0.04915
NW_004801691.1:3512830-3513175	MTD	3' exon	partial	Sppl3	0.0019
NW_004801693.1:7948760-7949083	MTD	3' exon	partial	mA.11233.1	0.0002
NW_004801618.1:20343842-20344221	MTD	3' exon	partial	mA.3737.2	0.00015
NW_004801687.1:702108-702519	MTD	3' exon	partial	mA.10679.1	0.00305
NW_004801756.1:4270403-4270662	MTD	3' exon	partial	mA.14543.1	0.0008
NW_004801612.1:1451993-1452395	MTD	3' exon	partial	mA.2428.1	0.00215
NW_004801721.1:1421847-1422080	MTD	3' exon	partial	mA.13090.2	0.0048
NW_004801610.1:15643097-15643501	MTD	3' exon	partial	LOC106020814	5e-05
NW_004811577.1:347-734	MTD	3' exon	partial	mA.18602.2	6.0797
NW_004801624.1:6706658-6707004	MTD	3' exon	partial	mA.4525.1	0.00465
NW_004801844.1:35025-35218	MTD	3' exon	partial	mA.16716.1	0.0593
NW_004801625.1:3665364-3665804	MTD	3' exon	partial	Cfap221	0.00095
NW_004801736.1:645816-646011	MTD	3' exon	partial	LOC106022189	0.0217
NW_004801667.1:375372-375461	MTD	3' exon	partial	Mbd1	0.00805
NW_004801698.1:573845-574125	MTD	3' exon	partial	Rassf5	0.0249
NW_004801640.1:12215725-12216080	MTD	3' exon	partial	mA.6716.3	0.0004
NW_004801619.1:19701658-19701979	MTD	3' exon	partial	mA.3865.2	0.0007
NW_004801659.1:6293388-6293793	MTD	3' exon	partial	mA.8588.2	0.0106
NW_004801651.1:7949008-7949344	MTD	3' exon	partial	mA.7851.1	0.0024
NW_004801634.1:2046151-2046295	MTD	3' exon	partial	mA.5859.1	0.00025
NW_004801651.1:6074600-6074890	MTD	3' exon	partial	mA.7832.5	0.0006
NW_004801726.1:455219-455340	MTD	3' exon	partial	Mvb12b	0.0522
NW_004801770.1:2486091-2486515	MTD	internal exon	partial	mA.15011.1	0.00045
NW_004801606.1:26335767-26336175	MTD	internal exon	partial	LOC106022340	0.0001
NW_004801620.1:5952781-5953162	MTD	internal exon	partial	mA.3928.1	0.0003
NW_004801838.1:187416-187826	MTD	internal exon	partial	mA.16602.3	0.02735
NW_004801667.1:3457883-3458110	MTD	internal exon	partial	Haus1	0.00115
NW_004801673.1:2548210-2548604	MTD	internal exon	partial	mA.9640.2	0.1096
NW_004801737.1:2919425-2919698	MTD	internal exon	partial	LOC101825515	0.00155
NW_004801607.1:27709023-27709300	MTD	internal exon	partial	Rasa1	0.00165
NW_004801842.1:366367-366514	MTD	internal exon	partial	Pold2	0.0024
NW_004801622.1:21196249-21196434	MTD	internal exon	partial	Rec114	0.00035
NW_004801628.1:3369096-3369401	MTD	internal exon	partial	mA.5025.3	0.0015
NW_004801628.1:9650479-9650888	MTD	internal exon	partial	mA.5091.1	5e-05
NW_004801697.1:3421919-3422036	MTD	internal exon	partial	mA.11665.1	0.0003
NW_004801608.1:27704644-27704988	MTD	internal exon	partial	mA.1790.1	5e-05
NW_004801624.1:2893325-2893428	MTD	internal exon	partial	mA.4438.1	0.0018
NW_004801690.1:9235858-9236095	MTD	internal exon	partial	mA.10987.2	0.0002
NW_004801628.1:3485637-3485929	MTD	internal exon	partial	mA.5029.1	0.00155
NW_004801822.1:1134449-1134826	MTD	internal exon	partial	mA.16403.2	0.01755
NW_004801674.1:8253891-8254272	MTD	internal exon	partial	mA.9721.1	0.00025
NW_004801628.1:361158-361513	MTD	internal exon	partial	Btbd9	0.00525
NW_004801742.1:4963820-4964186	MTD	internal exon	partial	mA.14043.1	0.00015
NW_004801628.1:12553290-12553649	MTD	internal exon	partial	mA.5112.1	0.0002
NW_004801614.1:14241110-14241507	MTD	internal exon	partial	Znf287	0.0001
NW_004801771.1:1869638-1869984	MTD	internal exon	partial	Apba2	0.00025
NW_004801640.1:14424119-14424479	MTD	internal exon	partial	mA.6759.1	0.0006
NW_004801614.1:1658962-1659332	MTD	internal exon	partial	LOC106020924	0.0003
NW_004801630.1:9865016-9865382	MTD	internal exon	partial	mA.5386.2	0.0002
NW_004801697.1:8659895-8660044	MTD	internal exon	partial	mA.11708.1	0.00035
NW_004801816.1:251394-251764	MTD	internal exon	partial	mA.16200.1	0.0077
NW_004801607.1:12574310-12574712	MTD	internal exon	partial	mA.1492.1	0.0002
NW_004801645.1:14522831-14523187	MTD	internal exon	partial	mA.7369.1	0.0008
NW_004801734.1:1037883-1038284	MTD	internal exon	partial	Ptprm	0.00045
NW_004801638.1:14976157-14976480	MTD	internal exon	partial	Spag1	5e-05
NW_004801613.1:13203851-13204240	MTD	internal exon	partial	mA.2724.2	0.0006
NW_004801686.1:2400857-2401140	MTD	internal exon	partial	mA.10595.1	0.0005
NW_004801682.1:4422468-4422680	MTD	internal exon	partial	mA.10356.1	5e-05
NW_004801617.1:17949483-17949847	MTD	internal exon	partial	mA.3562.1	0.0001
NW_004801749.1:2260005-2260390	MTD	internal exon	partial	Hmgb1	0.00095
NW_004801617.1:23602893-23603010	MTD	internal exon	partial	mA.3574.1	5e-05
NW_004801610.1:12487864-12488276	MTD	internal exon	partial	mA.2136.1	0.0007
NW_004801734.1:3429372-3429795	MTD	internal exon	partial	mA.13716.1	0.00535
NW_004801756.1:4270734-4271037	MTD	internal exon	partial	mA.14543.1	0.0002
NW_004801614.1:23313000-23313362	MTD	internal exon	partial	mA.3164.1	0.00015
NW_004801731.1:1537968-1538157	MTD	internal exon	partial	mA.13612.1	0.0224
NW_004801742.1:2717479-2717627	MTD	internal exon	partial	mA.14015.1	0.0006
NW_004801641.1:2747840-2747950	MTD	internal exon	partial	mA.6806.1	0.0016
NW_004801649.1:13314536-13314873	MTD	internal exon	partial	mA.7721.3	0.00055
NW_004801718.1:3880160-3880386	MTD	internal exon	partial	Pign	0.00015
NW_004801653.1:8369403-8369787	MTD	internal exon	partial	mA.8058.1	0.0002
NW_004801630.1:4519915-4520095	MTD	internal exon	partial	mA.5332.1	0.00015
NW_004801730.1:5777055-5777471	MTD	internal exon	partial	Atp6v0a4	0.0014
NW_004801859.1:812595-812691	MTD	internal exon	partial	mA.16904.2	0.0009
NW_004801610.1:14225640-14226007	MTD	internal exon	partial	Slc35b3	5e-05
NW_004801733.1:1458556-1458921	MTD	internal exon	partial	Dock10	0.00375
NW_004801681.1:1604801-1605190	MTD	internal exon	partial	mA.10253.1	0.00055
NW_004801731.1:1537557-1537633	MTD	internal exon	partial	mA.13612.1	0.0224
NW_004801625.1:16707688-16708090	MTD	internal exon	partial	mA.4731.2	0.00015
NW_004801640.1:4488137-4488517	MTD	internal exon	partial	mA.6668.1	0.00075
NW_004801741.1:837248-837637	MTD	internal exon	partial	mA.13954.1	0.001
NW_004801640.1:2038263-2038393	MTD	internal exon	partial	Lrp6	0.0033
NW_004801610.1:15114011-15114373	MTD	internal exon	partial	Riok1	0.00045
NW_004801617.1:17248747-17249155	MTD	internal exon	partial	mA.3559.1	0.0001
NW_004801645.1:10674879-10675299	MTD	internal exon	partial	Mlip	0.0002
NW_004801663.1:9582924-9583301	MTD	internal exon	partial	mA.8938.1	0.0003
NW_004801608.1:6567207-6567585	MTD	internal exon	partial	mA.1651.1	0.0002
NW_004801611.1:7948316-7948489	MTD	tagging	partial	mA.2311.1	0.00045
NW_004801713.1:1134013-1134062	MTD	tagging	partial	Zbtb40	0.0021
NW_004801729.1:2103944-2104049	MTD	tagging	partial	mA.13508.1	0.00245
NW_004801646.1:4506186-4506427	MTD	tagging	partial	mA.7435.1	0.00095
NW_004801606.1:33015971-33016243	MTD	tagging	partial	mA.1330.2	0.0002
NW_004801680.1:6614230-6614398	MTD	tagging	partial	mA.10215.1	0.00155
NW_004801775.1:450631-450830	MTD	tagging	partial	Fhl1	0.01045
NW_004801629.1:15491573-15491651	MTD	tagging	partial	mA.5248.1	0.0007
NW_004801723.1:3885895-3886154	MTD	tagging	partial	Nfkb1	0.1406
NW_004801646.1:4506496-4506594	MTD	tagging	partial	mA.7435.1	0.00095
NW_004801796.1:1634006-1634214	MTD	tagging	partial	Tor1a	0.0196
NW_004801691.1:8460887-8461088	MTD	tagging	partial	mA.11113.1	0.0493
NW_004801695.1:3299711-3299802	MTD	tagging	partial	mA.11412.1	0.0008
NW_004801606.1:29166958-29167204	MTD	tagging	partial	mA.1303.1	0.0008
NW_004801758.1:2368897-2369139	MTD	tagging	partial	Dph7	0.0576
NW_004801651.1:8500470-8500874	MTD	tagging	partial	mA.7859.1	0.00655
NW_004801731.1:1534020-1534423	MTD	tagging	partial	mA.13612.1	0.00275
NW_004801606.1:40839775-40840158	MTD	tagging	partial	LOC101828514	0.00055
NW_004801781.1:1300827-1300951	MTD	tagging	partial	mA.15355.2	0.0346
NW_004801636.1:13490535-13490768	MTD	tagging	partial	mA.6248.1	0.0039
NW_004801689.1:8173468-8173855	MTD	tagging	partial	mA.10869.1	0.00105
NW_004801642.1:2554369-2554720	MTD	tagging	partial	Zbtb24	0.0016
NW_004801695.1:7544755-7544926	MTD	tagging	partial	Pcca	0.0014
NW_004801654.1:6974660-6975050	MTD	tagging	partial	mA.8189.1	0.00025
NW_004801632.1:6418375-6418680	MTD	tagging	partial	Kalrn	0.00715
NW_004801633.1:12870380-12870793	MTD	tagging	partial	mA.5788.1	0.0001
NW_004801723.1:3886658-3886788	MTD	tagging	partial	Nfkb1	0.1406
NW_004801615.1:7024119-7024507	MTD	tagging	partial	LOC106020942	0.02835
NW_004801809.1:1861687-1861880	MTD	tagging	partial	mA.16101.1	0.00375
NW_004801746.1:849400-849536	MTD	tagging	partial	Pde10a	0.00395
NW_004801706.1:3537713-3537863	MTD	tagging	partial	mA.12342.1	0.0003
NW_004801626.1:3693726-3693768	MTD	tagging	partial	mA.4774.1	0.0014
NW_004801604.1:6282499-6282844	MTD	tagging	partial	mA.94.1	0.00475
NW_004801724.1:1788-1979	MTD	tagging	partial	mA.13267.1	6.95985
NW_004801721.1:4139786-4140081	MTD	tagging	partial	mA.13114.1	0.00065
NW_004801608.1:14025497-14025651	MTD	tagging	partial	mA.1695.1	0.0003
NW_004801652.1:12540918-12541064	MTD	tagging	partial	Hmgxb3	0.0001
NW_004801717.1:5943049-5943207	MTD	tagging	partial	Cd70	0.0056
NW_004801609.1:20239152-20239181	MTD	tagging	partial	mA.2002.1	0.00015
NW_004801617.1:10268224-10268307	MTD	tagging	partial	mA.3497.1	0.00035
NW_004801818.1:114955-115051	MTD	tagging	partial	Unc13a	0.01765
NW_004801660.1:6347250-6347570	MTD	tagging	partial	Tead1	0.00195
NW_004801651.1:8502051-8502135	MTD	tagging	partial	mA.7859.1	0.00655
NW_004801729.1:5566168-5566564	MTD	tagging	partial	mA.13546.2	0.0014
NW_004801753.1:415238-415536	MTD	tagging	partial	mA.14412.1	0.0997
NW_004801758.1:2368666-2368782	MTD	tagging	partial	Dph7	0.0576
NW_004801613.1:19038460-19038604	MTD	tagging	partial	Slc38a4	0.0004
NW_004801649.1:13764165-13764562	MTD	tagging	partial	mA.7727.1	5e-05
NW_004801634.1:994097-994285	MTD	tagging	partial	Zfp2	0.0097
NW_004801619.1:15970477-15970665	MTD	tagging	partial	mA.3828.1	0.00265
NW_004801697.1:3636600-3636770	MTD	tagging	partial	mA.11674.1	0.00165
NW_004801691.1:8433783-8434152	MTD	tagging	partial	mA.11111.1	0.2377
NW_004801621.1:9933587-9933943	MTD	tagging	partial	mA.4028.1	0.00035
NW_004801604.1:20195797-20196065	MTD	tagging	partial	Noc3l	5e-05
NW_004801628.1:17586458-17586513	MTD	tagging	partial	Slc29a3	5e-05
NW_004801619.1:10211069-10211454	MTD	tagging	partial	mA.3803.1	0.0013
NW_004801652.1:5937685-5937958	MTD	tagging	partial	mA.7955.1	0.0067
NW_004801640.1:11083848-11084209	MTD	tagging	partial	mA.6713.1	0.00135
NW_004801689.1:4873706-4874078	MTD	tagging	partial	Hhla1	0.00405
NW_004801604.1:8683480-8683900	MTD	tagging	partial	Sorcs1	0.00025
NW_004801728.1:5190836-5190949	MTD	tagging	partial	Gigyf2	0.00775
NW_004801605.1:11512047-11512114	MTD	tagging	partial	Aven	5e-05
NW_004801729.1:3041529-3041572	MTD	tagging	partial	Ctnnb1	0.0004
NW_004801631.1:612254-612338	MTD	tagging	partial	Rnf2	0.02715
NW_004801724.1:1407535-1407923	MTD	tagging	partial	mA.13291.1	0.00835
NW_004801697.1:3206996-3207343	MTD	tagging	partial	mA.11656.1	0.0009
NW_004801606.1:40874320-40874639	MTD	tagging	partial	LOC101838712	0.00055
NW_004801640.1:15795823-15796068	MTD	tagging	partial	mA.6776.1	0.0003
NW_004801625.1:2548165-2548344	MTD	tagging	partial	mA.4694.1	0.00195
NW_004801871.1:374891-375091	MTD	tagging	partial	mA.17050.1	0.01455
NW_004801716.1:5769682-5770076	MTD	tagging	partial	mA.12784.1	0.008
NW_004801646.1:5754765-5754877	MTD	tagging	partial	mA.7445.1	0.0019
NW_004801694.1:5490794-5491123	MTD	tagging	partial	mA.11332.1	0.0013
NW_004801604.1:41869690-41869750	MTD	tagging	partial	mA.324.1	5e-05
NW_004801626.1:3693422-3693676	MTD	tagging	partial	mA.4774.1	0.0014
NW_004801682.1:5821383-5821471	MTD	tagging	partial	mA.10362.2	0.00815
NW_004801611.1:2971227-2971534	MTD	tagging	partial	mA.2267.2	0.04215
NW_004801771.1:3056825-3057224	MTD	tagging	partial	LOC106022364	0.0001
NW_004801625.1:2548524-2548722	MTD	tagging	partial	mA.4694.1	0.00195
NW_004801619.1:22647034-22647324	MTD	tagging	partial	Dusp18	0.00055
NW_004801633.1:14561073-14561304	MTD	tagging	partial	LOC101832102	0.00365
NW_004801622.1:13715694-13716074	MTD	tagging	partial	Btg4	0.02405
NW_004801644.1:9543303-9543467	MTD	tagging	partial	mA.7229.1	0.00015
NW_004801749.1:1933882-1934093	MTD	tagging	partial	mA.14241.1	0.00275
NW_004801753.1:414667-414738	MTD	tagging	partial	mA.14412.1	0.0997
NW_004801625.1:16505050-16505409	MTD	tagging	partial	mA.4729.1	0.00215
NW_004801645.1:12708932-12709019	MTD	tagging	partial	Gnb5	0.0001
NW_004801729.1:2014382-2014692	MTD	tagging	partial	mA.13505.1	0.00255
NW_004801684.1:7040169-7040381	MTD	tagging	partial	Rgs7	0.00265
NW_004801609.1:20239254-20239311	MTD	tagging	partial	mA.2002.1	0.00015
NW_004801674.1:4788854-4789263	MTD	tagging	partial	mA.9700.1	0.00085
NW_004801609.1:9101764-9101994	MTD	tagging	partial	Hrh1	0.00675
NW_004801606.1:40805575-40805710	MTD	tagging	partial	mA.1405.1	0
NW_004801686.1:2101610-2101916	MTD	tagging	partial	mA.10589.1	0.0096
NW_004801610.1:7989704-7989903	MTD	tagging	partial	LOC101840778	0.0002
NW_004801619.1:15962000-15962230	MTD	tagging	partial	mA.3827.1	0.00475
NW_004801691.1:8467451-8467769	MTD	tagging	partial	mA.11113.1	0.0493
NW_004801604.1:40320110-40320213	MTD	tagging	partial	mA.318.1	5e-05
NW_004801632.1:18153884-18154191	MTD	tagging	partial	Map3k13	0.00055
NW_004801651.1:8502142-8502179	MTD	tagging	partial	mA.7859.1	0.00655
NW_004801742.1:2060325-2060511	MTD	tagging	partial	mA.14003.1	0.04165
NW_004801654.1:8593902-8593983	MTD	tagging	partial	mA.8195.3	0.01095
NW_004801609.1:5673176-5673297	MTD	tagging	partial	mA.1902.1	0.0029
NW_004801716.1:6232956-6233299	MTD	tagging	partial	mA.12788.1	0.0014
NW_004801756.1:3277706-3278115	MTD	tagging	partial	mA.14526.1	0.0133
NW_004801606.1:3392873-3393175	MTD	tagging	partial	LOC106022504	0.00155
NW_004801701.1:4386849-4387025	MTD	tagging	partial	mA.11919.1	0.00035
NW_004801636.1:13442679-13442967	MTD	tagging	partial	mA.6239.1	0.062
NW_004801624.1:6699687-6699862	MTD	tagging	partial	mA.4525.2	0.0017
NW_004801636.1:13446050-13446152	MTD	tagging	partial	mA.6239.1	0.062
NW_004801629.1:13097988-13098342	MTD	tagging	partial	mA.5226.1	0.00015
NW_004801721.1:2550829-2551199	MTD	tagging	partial	mA.13095.2	0.0088
NW_004801751.1:527059-527411	MTD	tagging	partial	LOC101834049	0.1908
NW_004801622.1:13718772-13719128	MTD	tagging	partial	Btg4	0.02405
NW_004801729.1:6101606-6101957	MTD	tagging	partial	mA.13551.1	5e-05
NW_004801691.1:8400469-8400602	MTD	tagging	partial	mA.11111.1	0.2377
NW_004801888.1:502427-502624	MTD	tagging	partial	mA.17188.2	0.00265
NW_004801646.1:4674212-4674456	MTD	tagging	partial	mA.7436.1	0.00255
NW_004801691.1:8432118-8432212	MTD	tagging	partial	mA.11111.1	0.2377
NW_004801664.1:10603441-10603827	MTD	tagging	partial	mA.8994.1	0.00015
NW_004801742.1:3115750-3116033	MTD	tagging	partial	mA.14021.1	0.40795
NW_004801775.1:2004346-2004625	MTD	tagging	partial	mA.15129.3	0.00135
NW_004801680.1:6612941-6613207	MTD	tagging	partial	mA.10215.1	0.0002
NW_004801729.1:2104322-2104665	MTD	tagging	partial	mA.13508.1	0.00245
NW_004801797.1:738577-738822	MTD	tagging	partial	mA.15826.2	0.0019
NW_004801604.1:6283188-6283245	MTD	tagging	partial	mA.94.1	0.00475
NW_004801654.1:8298233-8298634	MTD	tagging	partial	mA.8194.1	0.00145
NW_004801633.1:14560831-14561006	MTD	tagging	partial	LOC101832102	0.00365
NW_004801681.1:5230297-5230595	MTD	tagging	partial	mA.10300.1	0.00105
NW_004801651.1:10533062-10533442	MTD	tagging	partial	mA.7880.1	0.00035
NW_004801842.1:658007-658288	MTD	tagging	partial	Nudcd3	0.00205
NW_004801615.1:7016355-7016737	MTD	tagging	partial	Ccdc38	0.0042
NW_004801686.1:6891116-6891208	MTD	tagging	partial	mA.10650.1	0.0006
NW_004801617.1:2841990-2842364	MTD	tagging	partial	mA.3423.1	0.00075
NW_004801694.1:3461246-3461481	MTD	tagging	partial	mA.11311.1	0.0044
NW_004801798.1:1166971-1167043	MTD	tagging	partial	mA.15838.1	0.0017
NW_004801625.1:1904076-1904165	MTD	tagging	partial	mA.4684.1	0.0004
NW_004801638.1:13658243-13658314	MTD	tagging	partial	mA.6436.1	0.0002
NW_004801606.1:40620368-40620622	MTD	tagging	partial	LOC101838180	0
NW_004801763.1:3482233-3482278	MTD	tagging	partial	mA.14757.1	0.00075
NW_004801608.1:25814312-25814715	MTD	tagging	partial	mA.1775.1	0.0031
NW_004801678.1:9218089-9218447	MTD	tagging	partial	Cacna2d3	0.00155
NW_004801606.1:11420939-11421301	MTD	tagging	partial	Fhod3	0.0401
NW_004801713.1:1134192-1134282	MTD	tagging	partial	Zbtb40	0.0021
NW_004801643.1:1701332-1701446	MTD	tagging	partial	LOC101824876	0.0123
NW_004801734.1:1778053-1778226	MTD	tagging	partial	mA.13700.1	0.00025
NW_004801691.1:8429041-8429424	MTD	tagging	partial	mA.11111.1	0.2377
NW_004803894.1:4500-4887	MTD	tagging	partial	mA.17817.1	2.35725
NW_004801609.1:28638342-28638751	MTD	tagging	partial	Klhl32	0.00025
NW_004801775.1:2004818-2004896	MTD	tagging	partial	mA.15129.3	0.00135
NW_004801773.1:1641695-1642091	MTD	tagging	partial	mA.15080.1	0.0106
NW_004801677.1:7899750-7900123	MTD	tagging	partial	Dgcr14	0.00035
NW_004801611.1:2970529-2970604	MTD	tagging	partial	mA.2267.2	0.04215
NW_004801626.1:3694472-3694538	MTD	tagging	partial	mA.4774.1	0.0014
NW_004801661.1:7232209-7232417	MTD	tagging	partial	Tmem92	0.00095
NW_004801680.1:7777701-7778004	MTD	tagging	partial	Sh3gl3	0.0021
NW_004801636.1:13443258-13443622	MTD	tagging	partial	mA.6239.1	0.062
NW_004801607.1:12220980-12221324	MTD	tagging	partial	mA.1491.3	0.0025
NW_004801649.1:12029130-12029354	MTD	tagging	partial	mA.7708.1	0.0012
NW_004801677.1:10427235-10427447	MTD	tagging	partial	mA.10011.1	0.0033
NW_004801636.1:13446228-13446552	MTD	tagging	partial	mA.6239.1	0.062
NW_004801621.1:13518955-13519338	MTD	tagging	partial	mA.4044.3	0.0065
NW_004801726.1:735105-735243	MTD	tagging	partial	mA.13346.1	0.0014
NW_004801667.1:11727990-11728161	MTD	tagging	partial	Frrs1l	0.0005
NW_004801624.1:7574984-7575378	MTD	tagging	partial	mA.4539.1	0.00015
NW_004801628.1:3349991-3350291	MTD	tagging	partial	mA.5025.3	0.0034
NW_004801684.1:666281-666477	MTD	tagging	partial	mA.10440.1	0.00125
NW_004801691.1:8424800-8425090	MTD	tagging	partial	mA.11111.1	0.2377
NW_004801684.1:666917-667031	MTD	tagging	partial	Capn8	0.08705
NW_004801914.1:158029-158081	MTD	tagging	partial	Orc6	0.1887
NW_004801695.1:3919374-3919673	MTD	tagging	partial	mA.11420.3	0.0004
NW_004805104.1:3726-3831	MTD	tagging	partial	Zbtb43	0.6794
NW_004801638.1:15114562-15114637	MTD	tagging	partial	Rgs22	5e-05
NW_004801742.1:2646916-2647254	MTD	tagging	partial	Kcnh1	0.0024
NW_004801691.1:8464664-8464966	MTD	tagging	partial	mA.11113.1	0.0493
NW_004801619.1:16021686-16021736	MTD	tagging	partial	mA.3833.1	0.0021
NW_004801660.1:6346995-6347073	MTD	tagging	partial	Tead1	0.00195
NW_004801605.1:30847259-30847356	MTD	tagging	partial	mA.957.1	0.00085
NW_004801691.1:8485098-8485487	MTD	tagging	partial	mA.11112.1	0.02145
NW_004801619.1:19703660-19703963	MTD	tagging	partial	mA.3865.2	0.0007
NW_004801604.1:64632770-64632895	MTD	tagging	partial	Adam12	5e-05
NW_004801656.1:96567-96675	MTD	tagging	partial	mA.8271.2	0.0081
NW_004801879.1:542498-542872	MTD	tagging	partial	mA.17112.1	0.0511
NW_004801670.1:797124-797218	MTD	tagging	partial	Fam188b	0.00125
NW_004801646.1:2886215-2886374	MTD	tagging	partial	mA.7416.1	0.00075
NW_004801619.1:19163853-19164065	MTD	tagging	partial	mA.3859.1	0.00045
NW_004801675.1:5675851-5676230	MTD	tagging	partial	mA.9777.1	0.0005
NW_004801670.1:1513025-1513396	MTD	tagging	partial	Fkbp14	0.00825
NW_004801633.1:10142890-10143281	MTD	tagging	partial	mA.5771.1	0.0009
NW_004801663.1:9245467-9245768	MTD	tagging	partial	Fnip2	0.0008
NW_004801626.1:10665871-10665969	MTD	tagging	partial	mA.4814.1	0.0025
NW_004801608.1:25680938-25681133	MTD	tagging	partial	mA.1773.1	5e-05
NW_004801606.1:40688270-40688419	MTD	tagging	partial	LOC106022334	0
NW_004801717.1:7619079-7619437	MTD	tagging	partial	LOC101828217	0.0002
NW_004801609.1:21678105-21678481	MTD	tagging	partial	Mtfr1	0.00035
NW_004801619.1:16016815-16016989	MTD	tagging	partial	mA.3831.1	0.0011
NW_004801646.1:3936488-3936881	MTD	tagging	partial	mA.7428.1	0.00325
NW_004801609.1:14595430-14595689	MTD	tagging	partial	mA.1968.1	0.00095
NW_004801644.1:10903377-10903442	MTD	tagging	partial	Ltbp1	5e-05
NW_004801673.1:2486144-2486545	MTD	tagging	partial	mA.9641.2	0.0033
NW_004801636.1:13443084-13443186	MTD	tagging	partial	mA.6239.1	0.062
NW_004801676.1:731382-731745	MTD	tagging	partial	mA.9805.2	0.00345
NW_004801691.1:8461368-8461574	MTD	tagging	partial	mA.11113.1	0.0493
NW_004801734.1:4246825-4247278	MTD	tagging	partial	mA.13721.1	0.00065
NW_004801777.1:782737-782932	MTD	tagging	partial	mA.15153.1	0.00125
NW_004801673.1:1981704-1982067	MTD	tagging	partial	mA.9637.1	0.0009
NW_004801765.1:1689844-1690235	MTD	tagging	partial	Slc36a4	0.00045
NW_004801695.1:6083591-6083934	MTD	tagging	partial	mA.11449.1	0.0126
NW_004801636.1:10302474-10302786	MTD	tagging	partial	mA.6181.1	0.0061
NW_004801673.1:1333657-1333914	MTD	tagging	partial	mA.9628.5	0.0151
NW_004801604.1:42704393-42704733	MTD	tagging	partial	LOC106021345	0.0002
NW_004801619.1:19703080-19703179	MTD	tagging	partial	mA.3865.2	0.0007
NW_004801615.1:7085836-7086169	MTD	tagging	partial	mA.3232.1	0.003
NW_004805104.1:3838-3946	MTD	tagging	partial	Zbtb43	0.6794
NW_004802679.1:1-128	MTD	tagging	partial	mA.17583.1	21881.6
NW_004801610.1:1438133-1438439	MTD	tagging	partial	mA.2041.1	0.00285
NW_004801818.1:1332929-1333140	MTD	tagging	partial	mA.16287.1	0.0004
NW_004801619.1:15959536-15959840	MTD	tagging	partial	mA.3827.1	0.00475
NW_004801620.1:12753007-12753407	MTD	tagging	partial	mA.3951.1	0.00375
NW_004801622.1:20855652-20855730	MTD	tagging	partial	Tbc1d21	0.0003
NW_004801694.1:2058588-2058687	MTD	tagging	partial	mA.11284.1	0.00095
NW_004801609.1:9101452-9101550	MTD	tagging	partial	Hrh1	0.00675
NW_004801623.1:13190995-13191309	MTD	tagging	partial	mA.4341.1	0.00135
NW_004801636.1:13445862-13445945	MTD	tagging	partial	mA.6239.1	0.062
NW_004801877.1:631125-631433	MTD	tagging	partial	mA.17098.1	0.0267
NW_004801607.1:18280789-18280906	MTD	tagging	partial	Pde8b	0.0031
NW_004801604.1:77175612-77176027	MTD	tagging	partial	mA.750.1	0
NW_004801749.1:4345079-4345335	MTD	tagging	partial	Gtf3a	0.0034
NW_004801644.1:10903213-10903375	MTD	tagging	partial	Ltbp1	5e-05
NW_004801633.1:12186688-12187056	MTD	tagging	partial	mA.5782.1	0.0013
NW_004801724.1:3468-3643	MTD	tagging	partial	mA.13267.1	6.95985
NW_004801871.1:374536-374741	MTD	tagging	partial	mA.17050.1	0.01455
NW_004809733.1:4153-4312	MTD	tagging	partial	mA.18490.1	0.86705
NW_004801791.1:2878821-2879031	MTD	tagging	partial	Ttc28	0.0006
NW_004801629.1:19203232-19203561	MTD	tagging	partial	Pebp4	5e-05
NW_004801691.1:2974319-2974670	MTD	tagging	partial	mA.11032.1	0.00075
NW_004801676.1:6450129-6450467	MTD	tagging	partial	Fopnl	0.00025
NW_004801691.1:8414870-8415064	MTD	tagging	partial	mA.11111.1	0.2377
NW_004801744.1:304829-305182	MTD	tagging	partial	Adcy1	0.0082
NW_004801625.1:14185597-14185983	MTD	tagging	partial	mA.4721.1	0.0005
NW_004801623.1:12036479-12036850	MTD	tagging	partial	LOC101836438	0.00045
NW_004801646.1:2357068-2357281	MTD	tagging	partial	mA.7411.1	0.00305
NW_004801613.1:5852816-5853212	MTD	tagging	partial	mA.2650.1	0.00375
NW_004801646.1:4304107-4304471	MTE2a	5' exon	full	mA.7434.1	0.0059
NW_004801705.1:3856406-3856795	MTE2a	5' exon	full	mA.12237.1	0.00025
NW_004810779.1:1325-1727	MTE2a	5' exon	full	mA.18563.1	1.7664
NW_004801686.1:1429696-1430011	MTE2a	5' exon	full	Nsd1	0.00175
NW_004801608.1:28394946-28395159	MTE2a	5' exon	partial	Arid1b	0
NW_004801612.1:9333367-9333575	MTE2a	5' exon	partial	mA.2475.1	0.00265
NW_004801646.1:7053056-7053291	MTE2a	5' exon	partial	Eva1c	5e-05
NW_004801646.1:8140461-8140515	MTE2a	5' exon	partial	mA.7481.1	0.00035
NW_004801768.1:1548643-1549003	MTE2a	5' exon	partial	mA.14900.1	0.0011
NW_004801619.1:2512892-2513190	MTE2a	5' exon	partial	Ppargc1a	0.0003
NW_004805180.1:7387-7814	MTE2a	3' exon	full	Gstz1	0.18995
NW_004801614.1:21709842-21710255	MTE2a	3' exon	full	mA.3148.1	0
NW_004801616.1:846345-846727	MTE2a	3' exon	full	Rasgef1b	0.00055
NW_004801646.1:4306533-4306888	MTE2a	3' exon	partial	mA.7434.4	0.01415
NW_004801761.1:3392865-3393023	MTE2a	3' exon	partial	Ttc23	0.00145
NW_004801651.1:4852018-4852257	MTE2a	3' exon	partial	mA.7826.1	0.00235
NW_004801686.1:8537045-8537234	MTE2a	3' exon	partial	Ercc6l2	0.0003
NW_004801726.1:6461470-6461579	MTE2a	3' exon	partial	mA.13395.1	0.00605
NW_004801620.1:12756706-12756957	MTE2a	3' exon	partial	mA.3951.1	0.0013
NW_004801604.1:13390497-13390651	MTE2a	3' exon	partial	LOC101827968	0.00085
NW_004801613.1:5815186-5815573	MTE2a	3' exon	partial	mA.2649.1	0.0001
NW_004801608.1:18396659-18396999	MTE2a	3' exon	partial	Plagl1	0.00095
NW_004801879.1:506098-506248	MTE2a	3' exon	partial	mA.17112.1	0.00475
NW_004801690.1:8401811-8402178	MTE2a	3' exon	partial	Nfx1	0.00235
NW_004801702.1:7212266-7212488	MTE2a	3' exon	partial	mA.12105.1	0.00015
NW_004801698.1:4540114-4540536	MTE2a	internal exon	partial	mA.11747.2	5e-05
NW_004801612.1:1502660-1503008	MTE2a	internal exon	partial	mA.2428.1	0.00105
NW_004801794.1:2400814-2401176	MTE2a	internal exon	partial	Setx	0.00285
NW_004801756.1:717627-717686	MTE2a	internal exon	partial	mA.14522.2	0.00295
NW_004801615.1:23061112-23061499	MTE2a	internal exon	partial	mA.3294.1	0.00035
NW_004801806.1:1538331-1538714	MTE2a	internal exon	partial	Rnpc3	0.00055
NW_004801702.1:2656014-2656064	MTE2a	internal exon	partial	mA.12039.1	0.0043
NW_004801613.1:789735-789983	MTE2a	internal exon	partial	mA.2549.1	0.0007
NW_004801913.1:201343-201488	MTE2a	internal exon	partial	mA.17297.1	0.0049
NW_004801691.1:6483163-6483559	MTE2a	internal exon	partial	mA.11088.1	0.00055
NW_004801816.1:250988-251387	MTE2a	internal exon	partial	mA.16200.1	0.0077
NW_004801614.1:19566335-19566707	MTE2a	internal exon	partial	mA.3138.1	0.0008
NW_004801646.1:2913709-2913848	MTE2a	tagging	partial	mA.7417.1	0.0024
NW_004801634.1:16701994-16702383	MTE2a	tagging	partial	mA.5936.2	0.00115
NW_004801619.1:5173480-5173566	MTE2a	tagging	partial	mA.3786.1	0.0337
NW_004805235.1:3716-3840	MTE2a	tagging	partial	mA.18009.1	0.24
NW_004801694.1:6299687-6299827	MTE2a	tagging	partial	mA.11341.1	0.00405
NW_004801606.1:3956531-3956806	MTE2a	tagging	partial	mA.1191.1	0.00105
NW_004801634.1:992897-993270	MTE2a	tagging	partial	Zfp2	0.0097
NW_004801604.1:2012419-2012537	MTE2a	tagging	partial	LOC101824567	0.0014
NW_004801624.1:7836218-7836564	MTE2a	tagging	partial	mA.4541.1	0.0003
NW_004801785.1:129797-130157	MTE2a	tagging	partial	mA.15457.2	0.0147
NW_004813431.1:349-454	MTE2a	tagging	partial	Rsl1d1	686.763
NW_004801656.1:12337908-12338011	MTE2a	tagging	partial	mA.8326.1	0.0001
NW_004801652.1:9749123-9749499	MTE2a	tagging	partial	mA.7995.1	0.00225
NW_004802954.1:14591-14885	MTE2a	tagging	partial	LOC101838193	0.05865
NW_004801692.1:939500-939675	MTE2a	tagging	partial	mA.11129.1	0.00265
NW_004801614.1:23785328-23785513	MTE2a	tagging	partial	Fstl4	0.00035
NW_004801628.1:12005895-12006063	MTE2a	tagging	partial	mA.5110.1	0.00465
NW_004801628.1:1090955-1091112	MTE2a	tagging	partial	mA.4982.4	0.1002
NW_004801630.1:5952477-5952606	MTE2a	tagging	partial	mA.5354.2	0.3901
NW_004801836.1:142043-142136	MTE2a	tagging	partial	mA.16564.1	0.04245
NW_004801636.1:8031272-8031404	MTE2a	tagging	partial	mA.6146.1	0.00055
NW_004801713.1:2721630-2722009	MTE2a	tagging	partial	mA.12625.1	0.00055
NW_004801674.1:6138751-6138882	MTE2a	tagging	partial	Plekhh2	0.00605
NW_004801722.1:2104925-2105096	MTE2a	tagging	partial	Ddah1	0.00605
NW_004801619.1:22647784-22647908	MTE2a	tagging	partial	Dusp18	0.00055
NW_004801691.1:4412199-4412467	MTE2a	tagging	partial	mA.11065.1	0.0058
NW_004801646.1:2913878-2914041	MTE2a	tagging	partial	mA.7417.1	0.0024
NW_004801628.1:1091632-1091879	MTE2a	tagging	partial	mA.4982.4	0.1002
NW_004801622.1:13826347-13826394	MTE2a	tagging	partial	Pou2af1	5e-05
NW_004801625.1:3680652-3681040	MTE2a	tagging	partial	Cfap221	0.00095
NW_004801630.1:619281-619580	MTE2a	tagging	partial	mA.5290.1	0.01325
NW_004801707.1:485285-485644	MTE2a	tagging	partial	mA.12390.1	0.00325
NW_004801676.1:5814483-5814824	MTE2a	tagging	partial	mA.9832.3	0.0014
NW_004801638.1:17295147-17295205	MTE2a	tagging	partial	mA.6490.1	0.0001
NW_004801717.1:4407790-4407899	MTE2a	tagging	partial	March2	0.0045
NW_004801619.1:5173568-5173680	MTE2a	tagging	partial	mA.3786.1	0.0337
NW_004801667.1:10063090-10063158	MTE2a	tagging	partial	mA.9207.2	0.00015
NW_004801642.1:8494714-8495140	MTE2a	tagging	partial	Frk	5e-05
NW_004801721.1:1423123-1423194	MTE2a	tagging	partial	mA.13090.2	0.0048
NW_004801630.1:5952625-5952668	MTE2a	tagging	partial	mA.5354.2	0.3901
NW_004801781.1:623514-623757	MTE2a	tagging	partial	mA.15338.1	0.0632
NW_004801614.1:23785698-23785852	MTE2a	tagging	partial	Fstl4	0.00035
NW_004801724.1:3992313-3992386	MTE2a	tagging	partial	Trappc12	0.0026
NW_004801717.1:4408120-4408247	MTE2a	tagging	partial	March2	0.0045
NW_004801630.1:618365-618464	MTE2a	tagging	partial	mA.5290.1	0.01325
NW_004801766.1:1429616-1430030	MTE2a	tagging	partial	mA.14810.1	0.0042
NW_004811376.1:1052-1431	MTE2a	tagging	partial	mA.18591.1	34.8419
NW_004804708.1:3230-3630	MTE2a	tagging	partial	mA.17935.1	1.45675
NW_004801716.1:6233659-6233767	MTE2a	tagging	partial	mA.12788.1	0.0014
NW_004801676.1:2336491-2336823	MTE2a	tagging	partial	mA.9819.1	0.0008
NW_004801608.1:13670017-13670375	MTE2a	tagging	partial	mA.1687.1	0.0001
NW_004801646.1:3219759-3219863	MTE2a	tagging	partial	mA.7420.1	0.0137
NW_004801716.1:6233810-6233908	MTE2a	tagging	partial	mA.12788.1	0.0014
NW_004801638.1:9648512-9648927	MTE2a	tagging	partial	Angpt1	0.0001
NW_004801651.1:4550477-4550701	MTE2a	tagging	partial	mA.7825.2	0.00735
NW_004801785.1:2871433-2871753	MTE2a	tagging	partial	Inip	0.02015
NW_004801614.1:19984047-19984438	MTE2a	tagging	partial	mA.3140.3	0.00095
NW_004801628.1:1361626-1361936	MTE2a	tagging	partial	Cbs	0.01855
NW_004801641.1:6919561-6919786	MTE2a	tagging	partial	mA.6857.1	0.0005
NW_004801651.1:4549877-4549978	MTE2a	tagging	partial	mA.7825.2	0.00735
NW_004801717.1:4408025-4408120	MTE2a	tagging	partial	March2	0.0045
NW_004801763.1:2983377-2983766	MTE2a	tagging	partial	Pomt2	0.00025
NW_004801651.1:10315891-10316290	MTE2a	tagging	partial	mA.7873.1	0.0002
NW_004801604.1:13390783-13390975	MTE2a	tagging	partial	LOC101827968	0.00085
NW_004803440.1:5045-5166	MTE2a	tagging	partial	mA.17724.1	2.9973
NW_004801654.1:4028165-4028338	MTE2a	tagging	partial	Traip	0.0128
NW_004801605.1:29219742-29220060	MTE2b	5' exon	full	mA.948.1	0.0001
NW_004801613.1:19044501-19044810	MTE2b	5' exon	full	Slc38a4	0.0003
NW_004801686.1:3342882-3343131	MTE2b	5' exon	full	mA.10602.1	0.00025
NW_004801614.1:19519205-19519545	MTE2b	5' exon	full	mA.3137.1	0.00025
NW_004801763.1:3427915-3428202	MTE2b	5' exon	partial	Angel1	0.01455
NW_004801610.1:3235760-3236066	MTE2b	5' exon	partial	Iars	0.00285
NW_004801692.1:1983886-1983982	MTE2b	5' exon	partial	mA.11132.1	0.00025
NW_004801651.1:7215944-7216278	MTE2b	5' exon	partial	mA.7846.2	0.0014
NW_004801645.1:15464004-15464319	MTE2b	5' exon	partial	Tex9	0.0001
NW_004801608.1:24326277-24326514	MTE2b	5' exon	partial	Ccdc170	5e-05
NW_004801659.1:9542480-9542685	MTE2b	3' exon	partial	mA.8633.1	0.0001
NW_004801606.1:40641361-40641448	MTE2b	3' exon	partial	LOC101837917	0.00175
NW_004801617.1:5713523-5713802	MTE2b	3' exon	partial	mA.3471.1	0.002
NW_004801611.1:1120408-1120464	MTE2b	3' exon	partial	mA.2247.1	0.00085
NW_004801608.1:24451901-24452197	MTE2b	3' exon	partial	mA.1764.1	0.00025
NW_004801756.1:539925-540219	MTE2b	3' exon	partial	Adgrl2	0.00345
NW_004801654.1:8943013-8943308	MTE2b	3' exon	partial	LOC106021533	0.0037
NW_004801638.1:16247178-16247553	MTE2b	3' exon	partial	mA.6474.1	0.0001
NW_004801642.1:2948781-2948921	MTE2b	internal exon	partial	mA.6975.1	0.00045
NW_004801792.1:1668535-1668705	MTE2b	internal exon	partial	mA.15702.2	0.0007
NW_004801617.1:3454115-3454417	MTE2b	internal exon	partial	mA.3436.2	0.0005
NW_004801731.1:382576-382886	MTE2b	internal exon	partial	mA.13603.1	0.02905
NW_004801685.1:10414485-10414766	MTE2b	internal exon	partial	mA.10540.1	0.0002
NW_004801712.1:5945809-5946133	MTE2b	internal exon	partial	mA.12582.1	0.0159
NW_004802067.1:8168-8393	MTE2b	internal exon	partial	mA.17436.1	0.05045
NW_004801688.1:9963060-9963403	MTE2b	internal exon	partial	mA.10806.1	0.0004
NW_004801707.1:2142716-2142983	MTE2b	internal exon	partial	LOC106022009	0.0002
NW_004801733.1:5120533-5120745	MTE2b	internal exon	partial	Trip12	0.00605
NW_004801628.1:2336884-2337132	MTE2b	internal exon	partial	mA.5004.1	0.0088
NW_004801640.1:8059573-8059828	MTE2b	internal exon	partial	Plekha5	0.00025
NW_004801753.1:3353752-3354076	MTE2b	internal exon	partial	Erich3	0.00055
NW_004801742.1:1542088-1542408	MTE2b	internal exon	partial	mA.13990.1	0.00575
NW_004801765.1:1160496-1160842	MTE2b	internal exon	partial	mA.14788.3	0.00485
NW_004801723.1:6424175-6424524	MTE2b	tagging	partial	LOC106022114	0.0081
NW_004801646.1:4210831-4210928	MTE2b	tagging	partial	Cbr3	0.0001
NW_004801646.1:4210414-4210517	MTE2b	tagging	partial	Cbr3	0.0001
NW_004801608.1:24452262-24452387	MTE2b	tagging	partial	mA.1764.1	0.00025
NW_004801875.1:381952-382121	MTE2b	tagging	partial	Tep1	0.0099
NW_004801651.1:7949425-7949682	MTE2b	tagging	partial	mA.7851.1	0.0024
NW_004801691.1:8481015-8481111	MTE2b	tagging	partial	mA.11113.1	0.0493
NW_004801666.1:4881499-4881879	MTE2b	tagging	partial	LOC101823391	0.00425
NW_004801606.1:31583983-31584206	MTE2b	tagging	partial	mA.1327.1	0.0005
NW_004801781.1:757483-757605	MTE2b	tagging	partial	mA.15344.1	0.0078
NW_004801870.1:442881-443212	MTE2b	tagging	partial	mA.17046.1	0.02715
NW_004801627.1:7760074-7760427	MTE2b	tagging	partial	Bard1	0.03385
NW_004801641.1:3964503-3964592	MTE2b	tagging	partial	Glg1	0.004
NW_004801675.1:11331304-11331554	MTE2b	tagging	partial	mA.9801.1	0.01035
NW_004801666.1:11530623-11530885	MTE2b	tagging	partial	LOC106021626	0.0003
NW_004801622.1:11109423-11109553	MTE2b	tagging	partial	mA.4178.1	0.0004
NW_004801733.1:3543759-3544015	MTE2b	tagging	partial	Slc19a3	0.0032
NW_004801606.1:40641763-40641973	MTE2b	tagging	partial	LOC101837917	0.00175
NW_004801689.1:5164914-5165027	MTE2b	tagging	partial	mA.10841.1	0.00035
NW_004801734.1:740161-740395	MTE2b	tagging	partial	mA.13690.1	0.00355
NW_004801742.1:1371536-1371611	MTE2b	tagging	partial	mA.13989.1	0.00865
NW_004801691.1:8481121-8481233	MTE2b	tagging	partial	mA.11113.1	0.0493
NW_004801636.1:10278238-10278314	MTE2b	tagging	partial	mA.6178.1	0.00335
NW_004801686.1:8790964-8791289	MTE2b	tagging	partial	mA.10668.1	0.00085
NW_004801719.1:1898945-1899045	MTE2b	tagging	partial	Tmem19	0.00075
NW_004801666.1:167367-167445	MTE2b	tagging	partial	LOC106021629	0.0243
NW_004801875.1:381553-381834	MTE2b	tagging	partial	Tep1	0.0099
NW_004801625.1:4231473-4231831	MTE2b	tagging	partial	mA.4704.1	0.003
NW_004801729.1:1972399-1972541	MTE2b	tagging	partial	mA.13503.1	0.003
NW_004801751.1:3236624-3237012	MTE2b	tagging	partial	LOC101822880	0.0003
NW_004801636.1:13446708-13446864	MTE2b	tagging	partial	mA.6241.1	0.0152
NW_004801617.1:10637534-10637589	MTE2b	tagging	partial	Tcl1a	0.0015
NW_004801686.1:8158743-8159037	MTE2b	tagging	partial	Fancc	0.00055
NW_004801646.1:4674457-4674771	MTE2b	tagging	partial	mA.7436.1	0.00255
NW_004801751.1:3238497-3238880	MTE2b	tagging	partial	LOC101822880	0.0003
NW_004801619.1:15963194-15963468	MTE2b	tagging	partial	mA.3827.1	0.00475
NW_004801661.1:2790168-2790226	MTE2b	tagging	partial	mA.8746.1	0.00175
NW_004801875.1:382465-382658	MTE2b	tagging	partial	Tep1	0.0099
NW_004801636.1:8290819-8290909	MTE2b	tagging	partial	mA.6150.1	0.0003
NW_004801790.1:1342659-1343044	MTE2b	tagging	partial	LOC101828681	0.03725
NW_004801716.1:6450157-6450491	MTE2b	tagging	partial	Otulin	0.00115
NW_004801736.1:3865498-3865804	MTE2b	tagging	partial	Myom2	0.0005
NW_004801877.1:650794-651069	MTE2b	tagging	partial	mA.17099.1	0.0184
NW_004801606.1:40245539-40245826	MTE2b	tagging	partial	Mtrr	0.0004
NW_004801604.1:40004755-40005046	MTE2b	tagging	partial	LOC101833964	0.0006
NW_004801730.1:1696563-1696813	MTE2b	tagging	partial	Exoc4	0.02285
NW_004801723.1:6442021-6442373	MTE2b	tagging	partial	LOC106022114	0.0002
NW_004801726.1:723378-723644	MTE2b	tagging	partial	mA.13346.1	0.01095
NW_004801651.1:11902063-11902215	MTE2b	tagging	partial	mA.7906.1	0.00095
NW_004801651.1:11902312-11902483	MTE2b	tagging	partial	mA.7906.1	0.00095
NW_004801604.1:40004584-40004721	MTE2b	tagging	partial	LOC101833964	0.0006
NW_004801628.1:17308872-17309177	MTEa	5' exon	full	mA.5151.1	0.00015
NW_004801691.1:6160555-6161140	MTEa	5' exon	full	Ksr2	0.00015
NW_004801624.1:12409028-12409390	MTEa	5' exon	full	mA.4571.1	0.0002
NW_004801621.1:6411506-6411855	MTEa	5' exon	partial	mA.4008.1	0.0001
NW_004801724.1:3656315-3656451	MTEa	5' exon	partial	mA.13300.1	0.0001
NW_004801776.1:898506-898933	MTEa	5' exon	partial	Fam174b	0.02635
NW_004801809.1:1501714-1502060	MTEa	5' exon	partial	mA.16099.1	0.00025
NW_004801856.1:272484-272825	MTEa	5' exon	partial	mA.16874.1	0.0025
NW_004801617.1:5707884-5708232	MTEa	5' exon	partial	mA.3471.1	0.00045
NW_004801721.1:1438753-1439124	MTEa	5' exon	partial	mA.13091.2	0.00255
NW_004801737.1:2066692-2067049	MTEa	5' exon	partial	mA.13820.1	0.00035
NW_004801654.1:8990881-8991084	MTEa	5' exon	partial	mA.8197.1	5e-05
NW_004801654.1:10630337-10630539	MTEa	5' exon	partial	mA.8223.1	0.0002
NW_004801643.1:747133-747410	MTEa	5' exon	partial	Sox13	0.00425
NW_004801702.1:6238973-6239237	MTEa	5' exon	partial	Polr2j	0.00045
NW_004801702.1:1964792-1965094	MTEa	3' exon	partial	mA.12036.1	0.0058
NW_004801647.1:11728237-11728612	MTEa	3' exon	partial	mA.7579.1	0.0001
NW_004801644.1:4931374-4931707	MTEa	3' exon	partial	mA.7169.1	0.00045
NW_004801713.1:3071250-3071382	MTEa	3' exon	partial	Tmco4	0.00085
NW_004801611.1:8481713-8482094	MTEa	3' exon	partial	mA.2320.3	0.0001
NW_004801742.1:1652326-1652657	MTEa	3' exon	partial	mA.13992.1	0.00275
NW_004801736.1:685503-685737	MTEa	3' exon	partial	mA.13776.1	0.0074
NW_004801609.1:11111442-11111818	MTEa	3' exon	partial	Ssuh2	0.0012
NW_004801614.1:23782922-23783237	MTEa	3' exon	partial	mA.3172.2	0.0003
NW_004801695.1:6381435-6381718	MTEa	3' exon	partial	mA.11453.1	0.0006
NW_004801624.1:13045930-13046264	MTEa	3' exon	partial	Cep112	0.00065
NW_004801742.1:4950011-4950219	MTEa	3' exon	partial	mA.14043.1	0.001
NW_004801611.1:1175537-1175822	MTEa	3' exon	partial	mA.2248.1	0.01925
NW_004801630.1:14106139-14106496	MTEa	3' exon	partial	mA.5411.7	0.0013
NW_004801723.1:1706620-1706999	MTEa	3' exon	partial	mA.13235.3	0.0004
NW_004801633.1:10142394-10142761	MTEa	3' exon	partial	mA.5771.1	0.0009
NW_004801651.1:7210419-7210799	MTEa	3' exon	partial	mA.7845.1	5e-05
NW_004801686.1:8437766-8437967	MTEa	3' exon	partial	mA.10663.1	0.00045
NW_004801680.1:9903618-9903715	MTEa	3' exon	partial	mA.10240.1	0.00025
NW_004801608.1:2517392-2517748	MTEa	3' exon	partial	mA.1638.1	0.00185
NW_004801734.1:894070-894400	MTEa	3' exon	partial	Ptprm	0.00205
NW_004801829.1:1802635-1802977	MTEa	3' exon	partial	Ttc33	0.00045
NW_004801611.1:23877259-23877613	MTEa	3' exon	partial	mA.2413.1	0.00015
NW_004801678.1:7449960-7450087	MTEa	3' exon	partial	mA.10077.1	0.00305
NW_004801611.1:8235845-8236172	MTEa	internal exon	partial	mA.2319.1	0.00015
NW_004801611.1:8377339-8377659	MTEa	internal exon	partial	mA.2320.1	0.0011
NW_004801713.1:3070913-3071061	MTEa	internal exon	partial	Tmco4	0.00015
NW_004801636.1:14574136-14574312	MTEa	internal exon	partial	mA.6266.1	5e-05
NW_004801796.1:581107-581259	MTEa	internal exon	partial	Gle1	0.025
NW_004801654.1:1687751-1687955	MTEa	internal exon	partial	mA.8091.1	0.00185
NW_004801686.1:6829257-6829416	MTEa	internal exon	partial	mA.10648.1	0.0008
NW_004801739.1:3030558-3030743	MTEa	internal exon	partial	mA.13897.1	0.00025
NW_004801796.1:580981-581055	MTEa	internal exon	partial	Gle1	0.025
NW_004801653.1:13271132-13271511	MTEa	internal exon	partial	mA.8064.1	5e-05
NW_004801676.1:2484338-2484598	MTEa	internal exon	partial	mA.9820.1	0.0002
NW_004801770.1:2341541-2341609	MTEa	internal exon	partial	mA.15009.1	0.00125
NW_004801633.1:13856372-13856708	MTEa	internal exon	partial	Gng4	0.00025
NW_004801642.1:8321200-8321538	MTEa	internal exon	partial	mA.7009.1	0.0001
NW_004801604.1:49579426-49579644	MTEa	internal exon	partial	Lgals12	0
NW_004801646.1:2102470-2102632	MTEa	tagging	partial	mA.7407.1	0.0022
NW_004801625.1:3663674-3664018	MTEa	tagging	partial	Cfap221	0.00095
NW_004801724.1:5168119-5168445	MTEa	tagging	partial	Pxdn	0.0008
NW_004801691.1:4409435-4409584	MTEa	tagging	partial	mA.11065.1	0.0058
NW_004801617.1:11284091-11284510	MTEa	tagging	partial	Clmn	0.00055
NW_004801608.1:25821086-25821213	MTEa	tagging	partial	mA.1775.1	0.0031
NW_004801622.1:12960933-12961072	MTEa	tagging	partial	mA.4189.1	0.00095
NW_004801654.1:6624437-6624574	MTEa	tagging	partial	Lrrfip2	0.0226
NW_004801610.1:12831273-12831457	MTEa	tagging	partial	mA.2138.1	0.00065
NW_004801705.1:1549435-1549777	MTEa	tagging	partial	mA.12217.1	0.0143
NW_004801694.1:1057589-1057940	MTEa	tagging	partial	Faap20	0.00545
NW_004801935.1:98522-98844	MTEa	tagging	partial	mA.17345.1	0.01105
NW_004801698.1:4536942-4537293	MTEa	tagging	partial	mA.11747.1	0.00205
NW_004801649.1:5878860-5878986	MTEa	tagging	partial	mA.7695.1	0.00865
NW_004801629.1:17922956-17923303	MTEa	tagging	partial	mA.5259.4	0.0005
NW_004801605.1:2445784-2446074	MTEa	tagging	partial	LOC101829385	0.0067
NW_004801660.1:7101331-7101650	MTEa	tagging	partial	Dkk3	0.01355
NW_004801608.1:29408426-29408573	MTEa	tagging	partial	Serac1	0.0001
NW_004801675.1:11333817-11334138	MTEa	tagging	partial	mA.9801.1	0.01035
NW_004801786.1:2571243-2571343	MTEa	tagging	partial	Gpkow	0.02475
NW_004801645.1:12488576-12488915	MTEa	tagging	partial	Tmod2	0.00055
NW_004801634.1:9124241-9124596	MTEa	tagging	partial	mA.5914.1	0.0005
NW_004801676.1:2486902-2487119	MTEa	tagging	partial	mA.9820.1	0.0007
NW_004801642.1:15483085-15483224	MTEa	tagging	partial	mA.7054.1	0.0004
NW_004801605.1:1702039-1702416	MTEa	tagging	partial	Disc1	0.0003
NW_004801640.1:11537681-11538008	MTEa	tagging	partial	Sox5	0.0002
NW_004801781.1:756684-756978	MTEa	tagging	partial	mA.15344.1	0.0078
NW_004801824.1:1711825-1712097	MTEa	tagging	partial	mA.16473.1	0.00395
NW_004801647.1:6639055-6639371	MTEa	tagging	partial	mA.7542.1	0.0031
NW_004801640.1:15801763-15802142	MTEa	tagging	partial	mA.6776.2	0.00025
NW_004801781.1:757087-757153	MTEa	tagging	partial	mA.15344.1	0.0078
NW_004801779.1:2097444-2097598	MTEa	tagging	partial	Vrk3	0.00055
NW_004801705.1:5917307-5917414	MTEa	tagging	partial	Orai1	0.02395
NW_004801751.1:4235933-4236028	MTEa	tagging	partial	LOC101830370	0.0001
NW_004801622.1:9179830-9179921	MTEa	tagging	partial	mA.4176.1	0.001
NW_004801660.1:6642734-6642970	MTEa	tagging	partial	Parva	0.00015
NW_004801610.1:7547883-7548262	MTEa	tagging	partial	Gmpr	0.00595
NW_004801636.1:8291770-8292134	MTEa	tagging	partial	mA.6150.1	0.0003
NW_004801646.1:2886992-2887305	MTEa	tagging	partial	mA.7416.1	0.00075
NW_004801680.1:9903767-9904034	MTEa	tagging	partial	mA.10240.1	0.00025
NW_004801800.1:1186396-1186731	MTEa	tagging	partial	LOC106022480	0.00825
NW_004801751.1:4236229-4236526	MTEa	tagging	partial	LOC101830370	0.0001
NW_004801641.1:10156085-10156429	MTEa	tagging	partial	Bco1	0.00025
NW_004801607.1:15442310-15442655	MTEa	tagging	partial	mA.1523.1	0.00205
NW_004801839.1:1181161-1181486	MTEa	tagging	partial	Prss16	0.02435
NW_004801629.1:17924645-17925003	MTEa	tagging	partial	mA.5259.4	0.0005
NW_004801676.1:8738227-8738289	MTEa	tagging	partial	mA.9870.1	0.0449
NW_004801753.1:3757568-3757692	MTEa	tagging	partial	mA.14435.3	0.0113
NW_004801608.1:25827606-25827754	MTEa	tagging	partial	mA.1777.1	0.00045
NW_004801669.1:3499445-3499655	MTEa	tagging	partial	LOC106021650	0.00015
NW_004801646.1:2134416-2134696	MTEa	tagging	partial	mA.7407.2	0.00125
NW_004801605.1:31044443-31044799	MTEa	tagging	partial	mA.961.1	0.0001
NW_004801728.1:1734994-1735363	MTEa	tagging	partial	mA.13435.1	0.0008
NW_004801724.1:5397477-5397571	MTEa	tagging	partial	Sntg2	0.00055
NW_004801647.1:11300141-11300466	MTEa	tagging	partial	Plekhb1	5e-05
NW_004801707.1:1443760-1444079	MTEa	tagging	partial	Paics	0.02095
NW_004801646.1:10206534-10206900	MTEa	tagging	partial	mA.7499.1	0.00115
NW_004801739.1:2869995-2870365	MTEa	tagging	partial	mA.13895.1	0.0049
NW_004801753.1:3757439-3757556	MTEa	tagging	partial	mA.14435.3	0.0113
NW_004801689.1:6339047-6339173	MTEa	tagging	partial	mA.10854.1	0.0006
NW_004801651.1:10531673-10531865	MTEa	tagging	partial	mA.7880.1	0.00035
NW_004801870.1:443236-443317	MTEa	tagging	partial	mA.17046.1	0.02715
NW_004801769.1:2195410-2195654	MTEa	tagging	partial	mA.14936.1	0.00195
NW_004801707.1:2251928-2251989	MTEa	tagging	partial	Srd5a3	0.0061
NW_004801678.1:7449886-7449981	MTEa	tagging	partial	mA.10077.1	0.00305
NW_004801804.1:2302154-2302232	MTEa	tagging	partial	LOC101825885	0.0048
NW_004801647.1:12476406-12476603	MTEa	tagging	partial	Clpb	0.0015
NW_004801606.1:4019398-4019625	MTEa	tagging	partial	mA.1193.1	0.00175
NW_004801660.1:10404482-10404796	MTEa	tagging	partial	Tub	0.00835
NW_004801691.1:4857612-4857696	MTEa	tagging	partial	mA.11074.1	0.001
NW_004801647.1:12475773-12476001	MTEa	tagging	partial	Clpb	0.0015
NW_004801628.1:1093149-1093253	MTEa	tagging	partial	mA.4982.4	0.1002
NW_004801636.1:9319333-9319585	MTEb	5' exon	partial	mA.6156.2	0.00035
NW_004801611.1:1176264-1176444	MTEb	5' exon	partial	mA.2248.2	0.0224
NW_004801638.1:14772945-14773030	MTEb	5' exon	partial	mA.6456.2	0.00035
NW_004801604.1:73272136-73272268	MTEb	5' exon	partial	mA.720.1	0
NW_004801643.1:95901-96181	MTEb	5' exon	partial	mA.7062.1	0.12225
NW_004801796.1:159650-159844	MTEb	3' exon	full	LOC101836245	0.00215
NW_004801636.1:12639855-12640120	MTEb	3' exon	partial	mA.6237.1	0.00015
NW_004801677.1:8735046-8735132	MTEb	3' exon	partial	Ypel1	0.00025
NW_004801681.1:7109407-7109476	MTEb	3' exon	partial	mA.10315.1	0.00025
NW_004801647.1:60439-60779	MTEb	3' exon	partial	LOC106021461	0.0105
NW_004801676.1:3639122-3639453	MTEb	3' exon	partial	mA.9828.1	0.00035
NW_004801694.1:3414814-3414911	MTEb	3' exon	partial	mA.11310.2	0.0386
NW_004801614.1:18703685-18703910	MTEb	3' exon	partial	Znf672	0.0003
NW_004801742.1:1539524-1539914	MTEb	3' exon	partial	mA.13990.1	0.00625
NW_004801783.1:595897-596239	MTEb	3' exon	partial	mA.15407.1	0.00105
NW_004801785.1:1628080-1628318	MTEb	3' exon	partial	mA.15480.1	0.0015
NW_004801765.1:625928-626249	MTEb	3' exon	partial	Ankrd49	0.1077
NW_004801693.1:2207766-2207943	MTEb	3' exon	partial	mA.11194.1	0.00045
NW_004801798.1:1762941-1763263	MTEb	3' exon	partial	mA.15861.1	0.0017
NW_004801638.1:7827351-7827435	MTEb	internal exon	partial	mA.6391.1	5e-05
NW_004801632.1:19295341-19295588	MTEb	internal exon	partial	Eif2b5	5e-05
NW_004801668.1:11164273-11164640	MTEb	internal exon	partial	mA.9322.2	0.0007
NW_004801695.1:6410425-6410630	MTEb	internal exon	partial	mA.11454.1	0.00015
NW_004801698.1:3038131-3038243	MTEb	internal exon	partial	mA.11735.4	0.00025
NW_004801792.1:792865-793218	MTEb	internal exon	partial	mA.15688.1	0.0012
NW_004801610.1:2365561-2365828	MTEb	internal exon	partial	Shc3	0.00115
NW_004801731.1:5326952-5327266	MTEb	internal exon	partial	Kctd3	0.00015
NW_004801610.1:27630974-27631305	MTEb	internal exon	partial	LOC101827296	0
NW_004801675.1:11326267-11326555	MTEb	internal exon	partial	mA.9801.1	0.0005
NW_004801678.1:9816948-9817282	MTEb	tagging	partial	mA.10097.1	0.0001
NW_004801604.1:18300266-18300598	MTEb	tagging	partial	Opalin	0.0003
NW_004801737.1:4330591-4330821	MTEb	tagging	partial	mA.13837.1	0.0004
NW_004801687.1:80147-80350	MTEb	tagging	partial	mA.10678.1	0.1747
NW_004801728.1:3711650-3711814	MTEb	tagging	partial	mA.13445.1	0.003
NW_004801611.1:20502537-20502623	MTEb	tagging	partial	mA.2385.1	0.0008
NW_004805253.1:1872-1987	MTEb	tagging	partial	mA.18014.1	18.6773
NW_004801636.1:13528020-13528140	MTEb	tagging	partial	mA.6259.1	0.00015
NW_004801723.1:6496808-6497049	MTEb	tagging	partial	LOC106022114	0.0006
NW_004801702.1:1566851-1566944	MTEb	tagging	partial	mA.12034.1	0.00275
NW_004801633.1:17211252-17211322	MTEb	tagging	partial	Mplkip	5e-05
NW_004801633.1:2576769-2577015	MTEb	tagging	partial	mA.5738.1	0.00455
NW_004801660.1:12138320-12138435	MTEb	tagging	partial	mA.8723.1	0.00035
NW_004801727.1:2012342-2012431	MTEb	tagging	partial	Ttc39b	0.00045
NW_004801625.1:4233617-4233861	MTEb	tagging	partial	mA.4705.1	0.01245
NW_004801712.1:7212231-7212313	MTEb	tagging	partial	mA.12589.2	0.00215
NW_004801729.1:1778941-1779136	MTEb	tagging	partial	Ano10	0.00755
NW_004803621.1:3896-4099	MTEb	tagging	partial	mA.17766.1	1.0882
NW_004801621.1:13518151-13518341	MTEb	tagging	partial	mA.4044.3	0.0065
NW_004801691.1:6298878-6298982	MTEb	tagging	partial	Ksr2	0.03045
NW_004801754.1:401569-401905	MTEb	tagging	partial	mA.14453.1	0.0429
NW_004801687.1:702530-702730	MTEb	tagging	partial	mA.10679.1	0.00305
NW_004801693.1:2208324-2208425	MTEb	tagging	partial	mA.11194.1	0.00045
NW_004801691.1:6298480-6298582	MTEb	tagging	partial	Ksr2	0.03045
NW_004801660.1:8246074-8246172	MTEb	tagging	partial	mA.8691.1	0.0015
NW_004801800.1:787917-788097	MTEb	tagging	partial	mA.15929.1	0.00125
NW_004801652.1:5521603-5521887	MTEb	tagging	partial	mA.7948.1	0.00025
NW_004801678.1:1299340-1299731	MTEb	tagging	partial	mA.10024.1	0.00235
NW_004801862.1:413545-413610	MTEb	tagging	partial	Trim26	0.59445
NW_004801714.1:1368094-1368209	MTEb	tagging	partial	Zc3h12b	0.00495
NW_004801619.1:17609249-17609504	MTEb	tagging	partial	mA.3848.1	0.0001
NW_004801673.1:713054-713125	MTEb	tagging	partial	mA.9618.1	0.04195
NW_004801635.1:35206-35458	MTEb	tagging	partial	mA.5951.1	1.68675
NW_004801714.1:1367578-1367749	MTEb	tagging	partial	Zc3h12b	0.00495
NW_004801689.1:5375812-5376186	MTEb	tagging	partial	Tmem71	0.00085
NW_004801673.1:712237-712453	MTEb	tagging	partial	mA.9618.1	0.04195
NW_004801759.1:1103993-1104088	MTEb	tagging	partial	mA.14623.1	0.02125
NW_004801628.1:8893051-8893425	ORR1D1	5' exon	full	mA.5082.1	0.00045
NW_004801718.1:3490104-3490454	ORR1D1	5' exon	full	Zcchc2	0.00125
NW_004801630.1:10711213-10711523	ORR1D1	5' exon	full	Slc25a26	0
NW_004801681.1:8671938-8672304	ORR1D1	5' exon	full	mA.10332.1	0.00065
NW_004801740.1:5424917-5425264	ORR1D1	5' exon	full	Nnt	0.00015
NW_004801640.1:7792122-7792486	ORR1D1	5' exon	full	mA.6679.1	0.0002
NW_004801610.1:23200638-23200993	ORR1D1	5' exon	full	mA.2191.1	0
NW_004801730.1:797133-797446	ORR1D1	5' exon	full	Chchd3	0.00035
NW_004801624.1:7230790-7231080	ORR1D1	5' exon	full	mA.4532.1	0.00015
NW_004801771.1:1868225-1868543	ORR1D1	5' exon	full	Apba2	0.0021
NW_004801612.1:11890612-11890969	ORR1D1	5' exon	full	Stau2	5e-05
NW_004801781.1:1320644-1320995	ORR1D1	5' exon	full	mA.15355.1	0.00075
NW_004801618.1:8765241-8765532	ORR1D1	5' exon	full	Zc3h8	0.00025
NW_004801673.1:6707606-6707964	ORR1D1	5' exon	full	mA.9655.1	0.00035
NW_004801648.1:2543321-2543685	ORR1D1	5' exon	full	mA.7610.1	0.00125
NW_004801783.1:696536-696834	ORR1D1	5' exon	full	mA.15408.1	0.0005
NW_004801630.1:13643261-13643593	ORR1D1	5' exon	full	Lmod3	0.0001
NW_004801715.1:1197685-1197977	ORR1D1	5' exon	full	Cdc123	0.0006
NW_004801648.1:7547306-7547655	ORR1D1	5' exon	full	mA.7632.1	0.00025
NW_004801628.1:16195859-16196193	ORR1D1	5' exon	full	mA.5142.1	0.0001
NW_004801641.1:4967328-4967584	ORR1D1	5' exon	full	mA.6850.1	0.00145
NW_004801618.1:2663416-2663766	ORR1D1	5' exon	full	mA.3622.1	0.00015
NW_004801678.1:6084676-6085021	ORR1D1	5' exon	full	mA.10060.1	0.00015
NW_004801742.1:3119085-3119368	ORR1D1	5' exon	full	mA.14021.1	0.0043
NW_004801639.1:10856204-10856569	ORR1D1	5' exon	full	Mnat1	0.0001
NW_004801610.1:8486663-8487007	ORR1D1	5' exon	full	mA.2106.1	0.0001
NW_004801705.1:7843552-7843977	ORR1D1	5' exon	full	mA.12328.1	5e-05
NW_004801613.1:11461360-11461731	ORR1D1	5' exon	full	Syce3	0.0002
NW_004801605.1:19540909-19541199	ORR1D1	5' exon	full	Kiaa1549l	5e-05
NW_004801636.1:8330447-8330785	ORR1D1	5' exon	full	mA.6151.1	0.0001
NW_004801608.1:27725721-27726059	ORR1D1	5' exon	full	mA.1790.1	0
NW_004801624.1:5381288-5381630	ORR1D1	5' exon	full	Rnf157	0.00015
NW_004801643.1:6076390-6076752	ORR1D1	5' exon	full	mA.7121.1	0.0003
NW_004801676.1:1413744-1414016	ORR1D1	5' exon	partial	mA.9814.1	0.0007
NW_004801679.1:3609122-3609411	ORR1D1	5' exon	partial	Hhip	0.0005
NW_004801678.1:2655693-2655990	ORR1D1	5' exon	partial	Grid1	0.00055
NW_004801611.1:3061348-3061725	ORR1D1	5' exon	partial	Fgfr1	0.001
NW_004801628.1:3973922-3974279	ORR1D1	5' exon	partial	Znf280b	0.00015
NW_004801707.1:1890184-1890598	ORR1D1	5' exon	partial	mA.12405.1	0.00025
NW_004801605.1:48043564-48043796	ORR1D1	5' exon	partial	mA.1061.1	0.0002
NW_004801617.1:13465663-13465969	ORR1D1	5' exon	partial	mA.3534.1	0.00055
NW_004801608.1:25681135-25681486	ORR1D1	5' exon	partial	mA.1773.1	5e-05
[truncated: 540 more rows]
