# Supplementary material for: Long terminal repeats power evolution of genes and gene expression programs in mammalian oocytes and zygotes
Source: HighWire-hosted journal article supplement (doi:10.1101/gr.216150.116), 2017-05-18
Supplement: Supplemental_Table_S6.xlsx [file Supplemental_Table_S6.xlsx]

## Sheet: Sheet 1
		Franke et al. Table S6 - Annotation of class III (ERVL) LTR exaptations in Homo sapiens
genome coordinates	LTR group	exaptation type	full / partial	host gene	gene biotype	MII egg [LTR FPKM]	1-cell [LTR FPKM]	2-cell [LTR FPKM]	4-cell [LTR FPKM]	8-cell [LTR FPKM]	morula [LTR FPKM]
chr2:200806426-200806783	ERV3-16A3_LTR	3' exon	partial	TYW5	protein_coding	0.0096	0	0	0.026	0.3725	0.0312
chr11:120969686-120969950	ERV3-16A3_LTR	3' exon	partial	TBCEL	protein_coding	0	0	1.7818	0	0	0
chr13:60536513-60536847	ERV3-16A3_LTR	3' exon	partial	DIAPH3	protein_coding	0.404	1.1615	1.0366	0.5174	0.0026	0.4362
chr2:200807089-200807147	ERV3-16A3_LTR	tagging	partial	TYW5	protein_coding	0.0096	0	0	0.026	0.3725	0.0312
chr3:112640432-112640482	ERV3-16A3_LTR	tagging	partial	CD200R1	protein_coding	0	0	0	0	0.0251	0.0662
chr4:17629142-17629332	ERV3-16A3_LTR	tagging	partial	MED28	protein_coding	0.634	0.8221	1.2664	1.6477	3.3816	2.3464
chr6:118978000-118978282	ERV3-16A3_LTR	tagging	partial	CEP85L	protein_coding	0	0	0	0	0.1489	0
chr6:138735648-138735838	ERV3-16A3_LTR	tagging	partial	HEBP2	protein_coding	0.3377	0.1386	0.0543	0	0.4084	0.8171
chr6:138735837-138735913	ERV3-16A3_LTR	tagging	partial	HEBP2	protein_coding	0.3377	0.1386	0.0543	0	0.4084	0.8171
chr6:138736199-138736377	ERV3-16A3_LTR	tagging	partial	HEBP2	protein_coding	0.3377	0.1386	0.0543	0	0.4084	0.8171
chr6:138741564-138742007	ERV3-16A3_LTR	tagging	partial	HEBP2	protein_coding	0.3377	0.1386	0.0543	0	0.4084	0.8171
chr7:144318165-144318479	ERV3-16A3_LTR	tagging	partial	TPK1	protein_coding	0.0751	0.0409	0.0763	0.1356	0.0911	0.0911
chr8:6505479-6505910	ERV3-16A3_LTR	tagging	partial	CTD-2541M15.4	lincRNA	0	0	0	0	0	0.1313
chr15:100257871-100257929	ERV3-16A3_LTR	tagging	partial	LYSMD4	protein_coding	0.2118	0.058	0	0.0022	0.2783	0.5929
chr16:61685409-61685686	ERV3-16A3_LTR	tagging	partial	CDH8	protein_coding	0	0	0	0	0.0064	0
chr1:142587842-142588242	LTR16A	5' exon	full	RP11-417J8.2	lincRNA	1.122	2.0568	1.7613	1.0614	0.645	0
chr1:143498334-143498720	LTR16A	5' exon	full	RP11-435B5.6	lincRNA	4.8464	29.2769	25.6079	7.8795	3.1919	0.0896
chr5:104246464-104246875	LTR16A	5' exon	full	RP11-6N13.1	lincRNA	0.8954	0.35	1.6014	0.247	0	0
chr21:39493140-39493280	LTR16A	5' exon	partial	DSCR4	protein_coding	6.9274	3.6576	0.7791	1.9447	1.6163	1.2272
chr19:50504628-50504894	LTR16A	5' exon	partial	VRK3	protein_coding	0	0.0375	0.0891	0.0475	0.1124	0.0745
chr1:28921590-28921996	LTR16A	3' exon	partial	RAB42	protein_coding	0	0	0.0704	0	1.3297	1.5809
chr1:70449112-70449537	LTR16A	3' exon	partial	LRRC7	protein_coding	0	1.1942	0.9064	0.3519	0.3431	0
chr1:177430564-177430918	LTR16A	3' exon	partial	RP1-35C21.2	lincRNA	0.2306	2.3601	2.8538	0.14	0.2991	0
chr2:33933448-33933712	LTR16A	3' exon	partial	AC009499.1	lincRNA	0.2997	0.1866	0.4821	0.0072	1.9402	0
chr3:63110406-63110781	LTR16A	3' exon	partial	LINC00698	lincRNA	0	0.2779	0	0.292	0	0
chr3:72147861-72148184	LTR16A	3' exon	partial	LINC00877	lincRNA	0	0.0068	0.0151	0	0.0996	0
chr3:171002249-171002399	LTR16A	3' exon	partial	TNIK	protein_coding	0.943	0.5069	1.7704	0.3852	0.8315	0
chr8:81094920-81095294	LTR16A	3' exon	partial	MRPS28	protein_coding	0	0	0	0	0.1921	0.2363
chr11:46198275-46198701	LTR16A	3' exon	partial	RP11-702F3.3	lincRNA	0.099	0	0	0.6175	0.0676	0
chr18:62045827-62046007	LTR16A	3' exon	partial	RP11-146N18.1	lincRNA	13.8924	6.0684	7.5659	1.5657	0.4367	0.0136
chr2:3359717-3360134	LTR16A	internal exon	partial	TSSC1	protein_coding	0.3742	2.3896	5.5749	2.0048	0.6003	0
chr8:130278197-130278491	LTR16A	internal exon	partial	LINC00977	lincRNA	0.4606	0.0849	1.2528	2.4193	0.0112	0
chr9:24725320-24725542	LTR16A	internal exon	partial	RP11-20A20.2	lincRNA	0	0	0.7825	0	0	0
chr16:65397641-65397992	LTR16A	internal exon	partial	LINC00922	lincRNA	2.2857	4.0319	1.7318	0	0	0.5386
chr5:13238085-13238412	LTR16A	tagging	partial	RP11-419C19.2	lincRNA	0.3041	1.1704	1.1531	0.7058	0.3105	0
chr1:113005753-113005943	LTR16A	tagging	partial	CTTNBP2NL	protein_coding	0	0.039	0	0	0	0.0951
chr1:246847067-246847339	LTR16A	tagging	partial	RP11-439E19.9	lincRNA	0	0	0	0	0.0478	0.0024
chr2:47005674-47006100	LTR16A	tagging	partial	RP11-333I13.1	lincRNA	0.0194	0.1677	0	0.4067	0.4247	0.0203
chr6:126040841-126041250	LTR16A	tagging	partial	RP1-293L8.2	lincRNA	0.384	2.2544	2.4485	0.6654	0.0874	1.2866
chr3:106557513-106557619	LTR16A	tagging	partial	LINC00882	lincRNA	0	0	0	0	0.033	0
chr5:94892036-94892283	LTR16A	tagging	partial	ARSK	protein_coding	0	0	0.1373	0.0281	0.6892	0.6392
chr5:149238944-149239348	LTR16A	tagging	partial	PDE6A	protein_coding	0	0	0	0	0.0077	0
chr6:167460365-167460468	LTR16A	tagging	partial	FGFR1OP	protein_coding	2.5546	2.4705	2.1419	1.5932	0.3014	0.8611
chr9:84391202-84391635	LTR16A	tagging	partial	RP11-154D17.1	lincRNA	0	0	0	0	0.0676	0
chr10:22507323-22507748	LTR16A	tagging	partial	RP11-108B14.5	lincRNA	0	0.0397	0	0	0	0
chr12:9039156-9039270	LTR16A	tagging	partial	A2ML1	protein_coding	0.0803	0.518	1.1672	0.1387	0	0
chr12:104166309-104166728	LTR16A	tagging	partial	NT5DC3	protein_coding	1.6613	1.8068	0.6301	0.3314	2.2244	0.3233
chr12:104344014-104344418	LTR16A	tagging	partial	C12orf73	protein_coding	0	0	0	0	0.0342	1.971
chr13:69844869-69845196	LTR16A	tagging	partial	LINC00383	lincRNA	0	0.0681	0.9828	0	0	0
chr19:46050279-46050475	LTR16A	tagging	partial	OPA3	protein_coding	0.0071	0.0979	0.0289	0.1075	0.5517	0.2735
chr15:40606987-40607412	LTR16A	tagging	partial	RP11-133K1.6	lincRNA	0.0051	0.0066	0.0065	0.0083	0.8859	0.0142
chr15:65391477-65391770	LTR16A	tagging	partial	UBAP1L	protein_coding	0	0.0012	0	0	0.0838	0.03
chr16:27766675-27766943	LTR16A	tagging	partial	KIAA0556	protein_coding	0	0.05	0	0.0332	0.0015	0
chr18:21938205-21938471	LTR16A	tagging	partial	OSBPL1A	protein_coding	0	0.2597	0.0093	0	0	0.1495
chr18:44884677-44884789	LTR16A	tagging	partial	CTD-2130O13.1	lincRNA	20.5544	15.5035	13.6182	5.0277	2.073	0.1167
chr18:57973929-57974071	LTR16A	tagging	partial	RP11-396N11.1	lincRNA	1.2005	1.1193	1.5614	0	0.0933	0
chr20:2463009-2463334	LTR16A	tagging	partial	ZNF343	protein_coding	0	0.5135	1.5067	0.6399	0.388	0.3071
chr21:47743576-47743667	LTR16A	tagging	partial	C21orf58	protein_coding	0.0165	0.1278	0	0.0733	0.1278	0.1676
chr20:53111278-53111426	LTR16A	tagging	partial	DOK5	protein_coding	1.0605	5.4083	1.7352	1.0792	2.8168	0
chr11:7353255-7353706	LTR16A1	5' exon	full	SYT9	protein_coding	3.5966	3.85	2.5496	0.9646	0.1828	0.241
chr20:41699620-41699867	LTR16A1	5' exon	full	PTPRT	protein_coding	0.8776	1.3133	2.1722	0.0246	0	0
chr3:18394557-18394976	LTR16A1	5' exon	partial	TBC1D5	protein_coding	0.0486	0.1443	0.2285	0.0216	0.1948	0
chr21:42144813-42145126	LTR16A1	5' exon	partial	DSCAM	protein_coding	0.2139	1.15	0.5431	0.849	0	0
chr10:92664955-92665363	LTR16A1	3' exon	partial	RPP30	protein_coding	4.5067	8.5251	2.097	0.651	13.4445	15.7186
chr17:25810742-25810886	LTR16A1	3' exon	partial	LGALS9	protein_coding	0	0	0	0	1.0214	0
chr18:32837640-32837961	LTR16A1	3' exon	partial	ZNF397	protein_coding	0	0	0	0	4.3918	0.5077
chr5:135634148-135634585	LTR16A1	internal exon	partial	TRPC7	protein_coding	4.5084	9.1571	9.1314	3.0901	1.6044	4.2288
chr1:43675860-43675995	LTR16A1	tagging	partial	WDR65	protein_coding	0	0.0696	0	0	0.2149	0
chr2:8064285-8064472	LTR16A1	tagging	partial	AC007463.2	lincRNA	0.0283	0.0913	0.9637	0.057	0.0278	0
chr2:12006069-12006453	LTR16A1	tagging	partial	AC096559.1	lincRNA	1.4344	1.9351	0.4274	0.9432	0.0075	0
chr3:33185870-33185961	LTR16A1	tagging	partial	CRTAP	protein_coding	0.0076	0.2744	0.141	0.0195	0.0056	0.3509
chr3:33185961-33186164	LTR16A1	tagging	partial	CRTAP	protein_coding	0.0076	0.2744	0.141	0.0195	0.0056	0.3509
chr3:33186630-33186754	LTR16A1	tagging	partial	CRTAP	protein_coding	0.0076	0.2744	0.141	0.0195	0.0056	0.3509
chr4:11395127-11395614	LTR16A1	tagging	partial	HS3ST1	protein_coding	0	0	0	0	0	0.0544
chr7:99131082-99131253	LTR16A1	tagging	partial	ZKSCAN5	protein_coding	0.0626	1.4623	1.6023	0.527	5.1831	1.4644
chr7:99131294-99131499	LTR16A1	tagging	partial	ZKSCAN5	protein_coding	0.0626	1.4623	1.6023	0.527	5.1831	1.4644
chr11:5362339-5362496	LTR16A1	tagging	partial	HBE1	protein_coding	16.3675	13.7498	19.1844	4.5352	6.3911	0.7683
chr12:123464088-123464181	LTR16A1	tagging	partial	ABCB9	protein_coding	0.0173	0.0096	0.0118	0.1057	1.3313	0.5689
chr12:129569425-129569836	LTR16A1	tagging	partial	TMEM132D	protein_coding	0	0	0	0	0	0
chr16:2256716-2256785	LTR16A1	tagging	partial	MLST8	protein_coding	0	0.3601	0	0	0.1461	0.6446
chr16:2256798-2256896	LTR16A1	tagging	partial	MLST8	protein_coding	0	0.2746	0	0	0.1392	0.5771
chr16:49205143-49205504	LTR16A1	tagging	partial	RP11-22D3.2	lincRNA	0.0221	0.2063	0	0.5214	0.0038	0
chr3:16389349-16389633	LTR16A2	5' exon	partial	OXNAD1	protein_coding	0.0625	0.403	0.3271	0.908	0.1973	0
chr4:164615367-164615819	LTR16A2	3' exon	partial	MARCH1	protein_coding	0	0	1.0249	0.3897	0.2395	0
chr20:18378945-18379161	LTR16A2	3' exon	partial	DZANK1	protein_coding	0	1.9559	0.9622	1.9045	0.3204	0
chr1:75230023-75230072	LTR16A2	tagging	partial	TYW3	protein_coding	3.4053	3.3336	3.4026	5.1501	6.8586	26.1611
chr3:37861542-37861790	LTR16A2	tagging	partial	ITGA9	protein_coding	2.727	2.6522	1.4291	0.7001	0.5257	0
chr3:37861830-37861948	LTR16A2	tagging	partial	ITGA9	protein_coding	2.727	2.6522	1.4291	0.7001	0.5257	0
chr6:116840311-116840515	LTR16A2	tagging	partial	FAM26E	protein_coding	0	0	0	0	0.0063	0.0358
chr6:137303402-137303524	LTR16A2	tagging	partial	RP11-55K22.5	lincRNA	0	0.1333	0	0	0	0
chr7:151291235-151291402	LTR16A2	tagging	partial	PRKAG2	protein_coding	0	0	0.6919	0	0	0
chr10:47004153-47004433	LTR16A2	tagging	partial	GPRIN2	protein_coding	0	0	0	0.0556	0	0
chr19:508576-508707	LTR16A2	tagging	partial	TPGS1	protein_coding	0	0.0153	0	0.0216	0.1117	0.0174
chr2:240908771-240909192	LTR16B	3' exon	full	NDUFA10	protein_coding	0	0	0	0.1227	2.0033	2.4595
chr7:16536091-16536163	LTR16B	internal exon	partial	SOSTDC1	protein_coding	4.0863	2.0275	0	3.4121	0	0
chr3:197684189-197684318	LTR16B	tagging	partial	IQCG	protein_coding	0	0	0.0905	0	0.0604	0
chr6:58238533-58238932	LTR16B	tagging	partial	XXbac-BPGBPG55C20.2	lincRNA	0.0255	0.0328	0.023	0	0.0834	0.02
chr11:73668827-73669239	LTR16B1	5' exon	full	DNAJB13	protein_coding	0	0.7029	0.1297	0.0954	0	0
chr6:36831681-36831844	LTR16B1	5' exon	partial	PPIL1	protein_coding	0.0268	1.1069	0.5871	1.0328	0.1647	0
chr8:96821937-96822403	LTR16B1	3' exon	full	RP11-90D11.1	lincRNA	0	0	0	0	0	2.0598
chr15:57582606-57583071	LTR16B1	3' exon	partial	TCF12	protein_coding	0	0	0	0	0	0.6038
chr1:55517011-55517312	LTR16B1	tagging	partial	PCSK9	protein_coding	0	0	0	0	0	0
chr1:58934196-58934607	LTR16B1	tagging	partial	OMA1	protein_coding	0	0	0.0302	0	0.0282	0
chr1:108741326-108741517	LTR16B1	tagging	partial	SLC25A24	protein_coding	0	0	0	0	0.0138	0.003
chr4:17629566-17629638	LTR16B1	tagging	partial	MED28	protein_coding	0.634	0.8221	1.2664	1.6477	3.3816	2.3464
chr4:17630239-17630308	LTR16B1	tagging	partial	MED28	protein_coding	0.634	0.8221	1.2664	1.6477	3.3816	2.3464
chr17:12907006-12907332	LTR16B1	tagging	partial	ELAC2	protein_coding	0	0.2092	0.0617	0.106	0.5092	0
chr2:59157817-59158246	LTR16B2	3' exon	partial	LINC01122	lincRNA	0	0	0	0	3.1417	0
chr2:67849364-67849627	LTR16B2	3' exon	partial	AC010987.5	lincRNA	0.5092	0.9397	0.9089	0.837	0.0097	0
chr2:128049982-128050107	LTR16B2	3' exon	partial	ERCC3	protein_coding	0	0.1627	0.048	1.4839	0	0
chr18:58306443-58306849	LTR16B2	3' exon	partial	RP11-325K19.1	lincRNA	0	0.3313	0.4547	0	0	0
chr4:104019581-104020025	LTR16B2	internal exon	partial	SLC9B2	protein_coding	0.1619	0.2553	0	0.0945	0.0031	0.0189
chr19:43343870-43344256	LTR16B2	internal exon	partial	PSG8	protein_coding	0	0	0	0	0	0
chr1:16929096-16929181	LTR16B2	tagging	partial	NBPF1	protein_coding	0	0.0255	0.0301	0	0.2927	0.1991
chr1:21780503-21780588	LTR16B2	tagging	partial	NBPF3	protein_coding	0.0073	0	0	0	0.3136	0.0153
chr3:125742172-125742482	LTR16B2	tagging	partial	SLC41A3	protein_coding	0	0.0848	0.0431	0.0016	0.0008	0.0119
chr20:25655312-25655392	LTR16B2	tagging	partial	ZNF337	protein_coding	0.07	3.1745	4.1522	3.7643	1.1438	0.9775
chr20:5478092-5478386	LTR16B2	tagging	partial	LINC00654	lincRNA	0.0435	0.1167	0.0123	0.2888	0.004	0
chrX:15583811-15584168	LTR16C	5' exon	full	ACE2	protein_coding	0.4209	1.0859	0.4007	0.4019	0.0131	0
chr21:19778350-19778675	LTR16C	5' exon	full	TMPRSS15	protein_coding	0	0	0.5853	0	0	0
chr6:79581552-79582070	LTR16C	5' exon	partial	IRAK1BP1	protein_coding	0	0	0	0	0.055	0
chr12:124570222-124570390	LTR16C	5' exon	partial	RP11-214K3.24	lincRNA	0	0.0031	0	0	0.0008	0.1311
chr9:28393699-28394116	LTR16C	5' exon	partial	LINGO2	protein_coding	1.0061	0.2995	1.1788	0.0271	0.066	0
chr16:56865323-56865443	LTR16C	5' exon	partial	NUP93	protein_coding	0.0691	0.8732	0.6838	0.8997	0.0094	0.203
chr11:15645529-15645867	LTR16C	5' exon	partial	RP11-396O20.1	lincRNA	0.2985	0.5296	0.5151	1.8164	0.4904	0
chr12:96936980-96937185	LTR16C	5' exon	partial	C12orf55	protein_coding	1.2218	0.7297	3.2524	0.1109	0.0309	0
chr17:18993980-18994405	LTR16C	5' exon	partial	RP11-160E2.19	lincRNA	0	0	0.0856	0	0	0
chr22:37629652-37629953	LTR16C	3' exon	full	RAC2	protein_coding	3.5869	3.3386	5.4459	1.1129	1.8597	0
chr5:13188888-13189034	LTR16C	3' exon	partial	RP11-419C19.2	lincRNA	12.4908	4.1125	7.0626	2.6994	1.6817	0
chr10:1206855-1206973	LTR16C	3' exon	partial	LINC00200	lincRNA	0.2908	0	0	0	0.1567	0.3855
chr15:93247557-93247863	LTR16C	3' exon	partial	FAM174B	protein_coding	0.2066	2.8414	3.7474	3.5991	0.3539	0
chr16:67943761-67944257	LTR16C	3' exon	partial	PSKH1	protein_coding	0	0	0	0	0.3151	0
chr20:32570817-32571183	LTR16C	3' exon	partial	RP5-1125A11.1	lincRNA	0	0	0	0.4726	0.1322	0
chr3:56932583-56932802	LTR16C	internal exon	partial	ARHGEF3	protein_coding	3.8261	0	0	0	0	0
chr3:191022069-191022346	LTR16C	internal exon	partial	UTS2B	protein_coding	2.0312	11.0979	2.3886	4.2675	0.3263	0.2508
chr15:21187259-21187692	LTR16C	internal exon	partial	CT60	lincRNA	0	0	0	0	0.2943	0
chr2:131132377-131132617	LTR16C	tagging	partial	PTPN18	protein_coding	0	0	0.8709	0	0	0
chr3:93779186-93779308	LTR16C	tagging	partial	DHFRL1	protein_coding	0.0018	0.0405	0.0106	0.0078	0.0114	0.0795
chr4:5266932-5267138	LTR16C	tagging	partial	STK32B	protein_coding	14.7247	13.6302	20.4876	15.5152	11.968	0.3956
chr4:5827996-5828129	LTR16C	tagging	partial	CRMP1	protein_coding	0.9857	1.0019	1.6635	0.8577	0.3688	0.1254
chr5:79924242-79924424	LTR16C	tagging	partial	DHFR	protein_coding	6.843	2.5182	0.4955	0.6456	6.5409	14.7868
chr10:105638536-105638947	LTR16C	tagging	partial	OBFC1	protein_coding	0.2282	0.2833	0.0923	0	0	0
chr7:1627874-1627964	LTR16C	tagging	partial	PSMG3-AS1	lincRNA	0.0507	0.0989	0.0532	0.1738	0.0018	0.0232
chr7:1628427-1628581	LTR16C	tagging	partial	PSMG3-AS1	lincRNA	0.0507	0.0989	0.0532	0.1738	0.0018	0.0232
chr13:74832929-74833363	LTR16C	tagging	partial	LINC00402	lincRNA	0	0	0	0	0.0344	0
chr11:62757787-62757915	LTR16C	tagging	partial	SLC22A8	protein_coding	0	0.0013	0.0028	0	0.0043	0
chr12:1083374-1083477	LTR16C	tagging	partial	RAD52	protein_coding	0.0206	0.0148	0.0022	0.0032	0.0469	0
chr12:1086075-1086169	LTR16C	tagging	partial	RAD52	protein_coding	0.0206	0.0148	0.0022	0.0032	0.0469	0
chr15:93248946-93248993	LTR16C	tagging	partial	FAM174B	protein_coding	0.2066	2.8414	3.7474	3.5991	0.3539	0
chr16:50681355-50681590	LTR16C	tagging	partial	RP11-401P9.4	lincRNA	0.0059	0.0306	0.0038	0	0.0034	0
chr16:50681611-50681703	LTR16C	tagging	partial	RP11-401P9.4	lincRNA	0.0059	0.0306	0.0038	0	0.0034	0
chr16:56865442-56865637	LTR16C	tagging	partial	NUP93	protein_coding	0.0691	0.8732	0.6838	0.8997	0.0094	0.203
chr16:66518503-66518865	LTR16C	tagging	partial	AC132186.1	protein_coding	0	0.0207	0	0	0	0
chr16:86116871-86117301	LTR16C	tagging	partial	RP11-805I24.1	lincRNA	0.0394	0.0339	0.0393	0.0092	0.001	0
chr17:39877348-39877445	LTR16C	tagging	partial	HAP1	protein_coding	0.0784	2.9522	2.0262	1.7652	1.5103	0.0807
chr4:14395514-14395659	LTR16D	3' exon	partial	AC006296.2	lincRNA	1.1351	0	0	0.2539	0.1022	0
chr5:71980176-71980327	LTR16D	3' exon	partial	CTC-347C20.1	lincRNA	0.0669	0.0784	0.5094	0.1192	0.0042	0
chr15:101887964-101888140	LTR16D	3' exon	partial	PCSK6	protein_coding	0.0131	0.1611	0.025	0	0.0045	0
chr7:89104106-89104281	LTR16D	internal exon	partial	AC002383.2	lincRNA	0	1.1793	0.7397	0.1921	0.4369	0
chr6:154711279-154711799	LTR16D	tagging	partial	CNKSR3	protein_coding	0.0004	0.0078	0.0139	0	0.1462	0.0952
chr6:154712770-154712902	LTR16D	tagging	partial	CNKSR3	protein_coding	0.0004	0.0078	0.0139	0	0.1462	0.0952
chr21:30376836-30376953	LTR16D	tagging	partial	RWDD2B	protein_coding	0.006	0.1123	0.0858	0.0526	0.001	0.2522
chr8:114627715-114628076	LTR16D1	5' exon	partial	RP11-67H2.1	protein_coding	0	0	0	0.6445	0	0
chr1:28562713-28562777	LTR16D1	tagging	partial	ATPIF1	protein_coding	19.4646	3.5252	6.2832	7.5665	49.9806	66.0148
chr6:154709927-154710042	LTR16D1	tagging	partial	CNKSR3	protein_coding	0.0004	0.0078	0.0139	0	0.1462	0.0952
chr1:44541697-44542183	LTR16D2	3' exon	full	RP5-1198O20.4	lincRNA	0	0.3237	0	0	0	0
chr8:145939505-145939600	LTR16D2	tagging	partial	AF186192.6	lincRNA	0	0	0	0	0.0025	0
chr14:50883127-50883579	LTR16E1	5' exon	full	CDKL1	protein_coding	1.1351	0.4881	0	0	10.3319	0
chr21:41099915-41100068	LTR16E1	5' exon	partial	AF064860.7	lincRNA	0	0	0	0	0.2833	0
chr2:145801142-145801553	LTR16E1	3' exon	full	TEX41	lincRNA	0.2554	0.5217	0	0	0.138	0.8266
chr8:121392943-121393281	LTR16E1	3' exon	partial	MRPL13	protein_coding	0	0	0	0	0.3987	0
chr10:109724198-109724318	LTR16E1	internal exon	partial	RP11-215N21.1	lincRNA	0	0	1.257	1.7034	0.5219	0
chr16:58847384-58847608	LTR16E1	internal exon	partial	RP11-410D17.2	lincRNA	3.4404	0.4529	2.9409	1.2293	0.0719	0
chr3:72147537-72147843	LTR16E1	tagging	partial	LINC00877	lincRNA	0	0.0068	0.0151	0	0.0996	0
chr8:61545621-61545846	LTR16E1	tagging	partial	RP11-91I20.3	lincRNA	0	0	0	0	0.1919	0.0022
chr14:24777867-24777951	LTR16E1	tagging	partial	CIDEB	protein_coding	0	1.3728	0.0368	0.0542	0.2179	0.3656
chr12:8244779-8245252	LTR16E1	tagging	partial	NECAP1	protein_coding	0	0.2169	0.2101	0.011	0.0843	0
chr12:129569916-129570144	LTR16E1	tagging	partial	TMEM132D	protein_coding	0	0	0	0	0	0
chr14:24778353-24778576	LTR16E1	tagging	partial	LTB4R2	protein_coding	0	0.0767	0	0	0.0895	0.1017
chr16:4497628-4497760	LTR16E1	tagging	partial	DNAJA3	protein_coding	0	0.1232	0.0121	1.0431	0.0043	0
chr21:41099697-41099867	LTR16E1	tagging	partial	AF064860.7	lincRNA	0	0	0	0	0.2833	0
chr1:54356176-54356670	LTR16E2	5' exon	full	YIPF1	protein_coding	0	0	0	0	0.2527	0
chr8:33240453-33240817	LTR16E2	5' exon	full	TTI2	protein_coding	0	1.041	1.0754	1.1754	0.4517	0.0678
chr5:179061046-179061161	LTR16E2	5' exon	partial	HNRNPH1	protein_coding	0	0	0	0	0.2164	0
chr6:57562748-57562871	LTR16E2	5' exon	partial	RP11-343D24.2	lincRNA	9.7684	2.4049	1.4907	0.8878	3.3682	0
chr2:66299457-66299963	LTR16E2	3' exon	full	AC074391.1	lincRNA	0	0	0	0.4481	0	0
chr4:14764023-14764526	LTR16E2	3' exon	full	LINC00504	lincRNA	0.1926	0.1355	1	0	0	0
chr15:40352187-40352639	LTR16E2	3' exon	full	SRP14-AS1	lincRNA	0	0	0.5442	0.9226	0.0085	0
chr9:82246985-82247387	LTR16E2	3' exon	partial	TLE4	protein_coding	0	0	0.6009	0	0	0
chr5:106305115-106305633	LTR16E2	internal exon	partial	CTC-254B4.1	lincRNA	1.6025	7.1062	4.7671	1.0521	1.9486	0.2103
chr8:92873441-92873900	LTR16E2	internal exon	partial	RP11-122C21.1	lincRNA	0	0	5.9276	4.815	0	0
chr8:130916495-130916887	LTR16E2	internal exon	partial	FAM49B	protein_coding	0	0.303	2.8318	4.002	8.8177	0
chr16:9495566-9495669	LTR16E2	internal exon	partial	RP11-243A14.1	lincRNA	0	2.4405	0	2.8264	0.043	0
chr17:5701010-5701251	LTR16E2	internal exon	partial	WSCD1	protein_coding	0.0447	12.2714	2.6146	2.4551	0.0152	0
chr17:5701474-5701693	LTR16E2	internal exon	partial	WSCD1	protein_coding	0.0447	12.2714	2.6146	2.4551	0.0152	0
chr2:116603086-116603240	LTR16E2	tagging	partial	DPP10	protein_coding	0.0865	0.1166	0.0384	0.202	0.1903	0
chr8:29810625-29811055	LTR16E2	tagging	partial	FAM183CP	lincRNA	0	0.0973	0	0	0	0
chr3:112721780-112721864	LTR16E2	tagging	partial	C3orf17	protein_coding	3.28	9.0844	10.0936	5.9978	4.7806	5.0448
chr4:130035184-130035721	LTR16E2	tagging	partial	C4orf33	protein_coding	0.6556	0.2358	0.0824	0.0154	0.1454	0.0144
chr4:130036480-130036912	LTR16E2	tagging	partial	C4orf33	protein_coding	0.6556	0.2358	0.0824	0.0154	0.1454	0.0144
chr7:94994502-94994828	LTR16E2	tagging	partial	PON1	protein_coding	0.2922	0.1199	0.2592	0.2744	0.0986	0.0767
chrX:155008532-155008850	LTR16E2	tagging	partial	SPRY3	protein_coding	0	0	0	0	0.0035	0
chr10:82405194-82405533	LTR16E2	tagging	partial	SH2D4B	protein_coding	0.7989	5.8515	6.7031	7.3625	0.3896	0.0139
chr21:38434698-38434787	LTR16E2	tagging	partial	PIGP	protein_coding	2.2108	0.5855	0.8185	0.1793	0.2462	0.3857
chr21:38434372-38434690	LTR16E2	tagging	partial	PIGP	protein_coding	2.2108	0.5855	0.8185	0.1793	0.2462	0.3857
chr4:25362977-25363358	LTR18A	5' exon	partial	ZCCHC4	protein_coding	0.025	2.358	0.7389	0.5962	0.0684	1.4455
chr2:38742578-38743115	LTR18B	5' exon	full	AC016995.3	lincRNA	0	0	0	0	0.1819	0
chr11:4598687-4599267	LTR18B	5' exon	full	C11orf40	protein_coding	0	0.0623	0.1379	0.6765	0.4122	0
chr2:191080475-191080599	LTR18B	tagging	partial	HIBCH	protein_coding	4.7289	1.3566	2.218	0.803	0.1658	0.306
chr2:191080582-191080727	LTR18B	tagging	partial	HIBCH	protein_coding	4.7289	1.3566	2.218	0.803	0.1658	0.306
chrX:14466637-14466852	LTR18B	tagging	partial	GLRA2	protein_coding	1.1103	0.6478	1.232	1.1144	0.6035	0
chrX:14466886-14467212	LTR18B	tagging	partial	GLRA2	protein_coding	1.1103	0.6478	1.232	1.1144	0.6035	0
chr10:81912274-81912878	LTR18B	tagging	partial	ANXA11	protein_coding	0.3809	1.1385	0.6491	0.2582	0.1152	1.5168
chr1:211356288-211356763	LTR32	5' exon	full	RP11-543B16.3	lincRNA	0	0	0	0	0	2.5857
chr2:31302138-31302592	LTR32	5' exon	full	GALNT14	protein_coding	3.4883	4.2858	3.5579	1.2796	0.1984	0
chr2:39775030-39775470	LTR32	5' exon	full	TMEM178A	protein_coding	4.9303	6.3064	3.6195	3.2187	1.0554	0
chr2:141988964-141989185	LTR32	5' exon	full	LRP1B	protein_coding	2.99	3.6429	3.0044	3.0246	0.1134	0
chr8:33833888-33834235	LTR32	5' exon	full	RP11-317N12.1	lincRNA	3.1801	3.3038	6.1618	3.7841	3.439	0
chr2:144004563-144004894	LTR32	5' exon	partial	ARHGAP15	protein_coding	5.7139	6.3288	2.0329	1.6572	1.9701	0
chr2:144004930-144005077	LTR32	5' exon	partial	ARHGAP15	protein_coding	5.7139	6.3288	2.0329	1.6572	1.9701	0
chr3:2373612-2373780	LTR32	5' exon	partial	CNTN4	protein_coding	21.3033	16.2362	12.396	6.4866	1.8225	0
chr8:95969844-95970288	LTR32	5' exon	partial	NDUFAF6	protein_coding	0	0	0	0.7764	0	0
chr3:129576062-129576137	LTR32	3' exon	partial	TMCC1	protein_coding	0	0	0	0	0.9416	0.181
chr4:87847407-87847853	LTR32	3' exon	partial	C4orf36	protein_coding	0	0.1839	0	0	0.1395	0.1397
chr2:32546842-32546911	LTR32	tagging	partial	AL133245.2	lincRNA	0	0.0064	0	0	0.1277	0.0157
chr2:32546930-32547172	LTR32	tagging	partial	AL133245.2	lincRNA	0	0.0064	0	0	0.1277	0.0157
chr4:41987940-41988362	LTR32	tagging	partial	DCAF4L1	protein_coding	3.5253	4.7894	3.9384	1.3746	3.5475	0.2446
chr6:13613206-13613437	LTR32	tagging	partial	SIRT5	protein_coding	0.0049	0.3205	0.2201	0.503	0.1805	0.1136
chr6:13613437-13613472	LTR32	tagging	partial	SIRT5	protein_coding	0.0049	0.3205	0.2201	0.503	0.1805	0.1136
chr6:13613452-13613529	LTR32	tagging	partial	SIRT5	protein_coding	0.0049	0.3205	0.2201	0.503	0.1805	0.1136
chr8:33834234-33834350	LTR32	tagging	partial	RP11-317N12.1	lincRNA	3.1801	3.3038	6.1618	3.7841	3.439	0
chr19:58433254-58433385	LTR32	tagging	partial	ZNF418	protein_coding	0	0.0118	0	0.032	0.5858	0.115
chr19:58433430-58433553	LTR32	tagging	partial	ZNF418	protein_coding	0	0.0118	0	0.032	0.5858	0.115
chr8:32785297-32785732	LTR33	5' exon	full	RP11-11N9.4	lincRNA	56.4116	42.4925	93.7423	42.986	25.5276	5.665
chr11:15126531-15126943	LTR33	5' exon	full	INSC	protein_coding	0	0	0.6534	0	0	0
chr8:128351470-128351642	LTR33	5' exon	partial	RP11-382A18.2	lincRNA	0.7567	0.5966	0	0	0	0
chr11:113200086-113200529	LTR33	5' exon	partial	TTC12	protein_coding	1.5528	3.3738	12.6035	2.0986	1.7389	0.0286
chr12:49497775-49498212	LTR33	5' exon	partial	LMBR1L	protein_coding	0	0.2155	0.5239	0.0138	1.429	0.0103
chr13:50964001-50964476	LTR33	5' exon	partial	DLEU1	protein_coding	0.3623	1.2151	0	0	0	0.076
chr15:93267448-93267652	LTR33	5' exon	partial	FAM174B	protein_coding	0	0	0	0	0.8016	0
chr4:104596575-104597079	LTR33	3' exon	full	TACR3	protein_coding	0	0.0996	0.5694	0	0.0198	0
chr15:81980719-81980933	LTR33	3' exon	full	CTD-2034I4.2	lincRNA	0	0	0.3814	0.0351	0	0
chr1:54394700-54395178	LTR33	3' exon	partial	HSPB11	protein_coding	85.2626	17.9101	14.9045	13.3459	11.3583	9.0873
chr1:95193635-95194067	LTR33	3' exon	partial	LINC01057	lincRNA	0	0.2883	0.9512	0	0	0
chr1:142568440-142568549	LTR33	3' exon	partial	RP11-417J8.2	lincRNA	2.7713	15.4958	11.9221	2.7206	2.3441	0.0427
chr2:145525440-145525780	LTR33	3' exon	partial	TEX41	lincRNA	1.898	2.7846	1.2045	3.5967	3.3409	3.3985
chr3:55394297-55394476	LTR33	3' exon	partial	RP11-875H7.2	lincRNA	0.7235	0.1931	2.6361	2.4634	0.0852	0
chr3:173154384-173154790	LTR33	3' exon	partial	NLGN1	protein_coding	0	0	0.3958	0	0	0
chr4:23042291-23042445	LTR33	3' exon	partial	RP11-412P11.1	lincRNA	0.6737	0.8373	0.0156	0	0.8272	0.2156
chr4:34125330-34125485	LTR33	3' exon	partial	RP11-548L20.1	lincRNA	0	0	0	0.0218	0.4989	0
chr4:103178760-103178820	LTR33	3' exon	partial	SLC39A8	protein_coding	0.0317	0	1.2062	0.3549	0	0
chr5:10471607-10472067	LTR33	3' exon	partial	ROPN1L	protein_coding	0	0.6789	0	0	0	0
chr17:5433305-5433544	LTR33	3' exon	partial	NLRP1	protein_coding	0	0.3214	0	0	0	0
chr16:82587790-82587859	LTR33	3' exon	partial	RP11-2L4.1	lincRNA	0	0	0	0	0.1627	0
chr22:23506378-23506578	LTR33	3' exon	partial	RAB36	protein_coding	0.5184	3.6364	1.5623	0.7478	0.7453	0.0476
chr19:13354731-13355051	LTR33	3' exon	partial	CACNA1A	protein_coding	0	0	0.3386	0	0	0
chr1:56138807-56139314	LTR33	internal exon	partial	RP11-466L17.1	lincRNA	20.549	2.4237	6.2597	0	0.6413	0
chr2:40804790-40805062	LTR33	internal exon	partial	SLC8A1	protein_coding	2.792	8.1126	9.8615	4.0386	0	0
chr2:74135174-74135566	LTR33	internal exon	partial	ACTG2	protein_coding	0	0.5691	0.8924	2.24	0.0988	0.2315
chr2:200511732-200512210	LTR33	internal exon	partial	AC093590.1	lincRNA	0	0	0	0	0	0
chr3:108094493-108094710	LTR33	internal exon	partial	HHLA2	protein_coding	32.7172	78.7279	104.114	71.2628	53.4676	0.1402
chr5:117908863-117909048	LTR33	internal exon	partial	CTD-2281M20.1	lincRNA	0.7699	0	4.5101	7.7972	0	0
chr7:133503641-133503995	LTR33	internal exon	partial	EXOC4	protein_coding	0	0	2.1302	0	0	0
chr7:156234352-156234701	LTR33	internal exon	partial	AC073133.2	lincRNA	7.7367	6.8178	13.563	9.3293	4.3704	0
chr8:121939545-121939993	LTR33	internal exon	partial	RP11-369K17.1	lincRNA	46.8339	84.3079	96.272	44.1674	63.2281	0.5876
chr15:46219001-46219128	LTR33	internal exon	partial	RP11-718O11.1	lincRNA	0	0	0.7627	0	0.0304	0
chr13:45378758-45378884	LTR33	internal exon	partial	LINC00330	lincRNA	0	0	0	0	0	1.3792
chr15:66976165-66976649	LTR33	internal exon	partial	RP11-321F6.1	protein_coding	1.3931	0	0.7367	0	0	0
chr1:27422387-27422552	LTR33	tagging	partial	SLC9A1	protein_coding	0	0	0.6129	0	0	0
chr1:205765129-205765415	LTR33	tagging	partial	SLC41A1	protein_coding	0	0.2623	0.1222	0.0412	0.0091	0
chr2:109500237-109500341	LTR33	tagging	partial	CCDC138	protein_coding	0.0166	0	0.1283	0	0	0.0065
chr2:200625745-200625855	LTR33	tagging	partial	FTCDNL1	protein_coding	0	0	0.8531	0	0	0
chr3:48437083-48437165	LTR33	tagging	partial	FBXW12	protein_coding	0.7387	3.4877	4.88	5.8042	0.2168	0
chr3:55394548-55394617	LTR33	tagging	partial	RP11-875H7.2	lincRNA	0.7235	0.1931	2.6361	2.4634	0.0852	0
chr3:72147190-72147461	LTR33	tagging	partial	LINC00877	lincRNA	0	0.0068	0.0151	0	0.0996	0
chr3:123672467-123672871	LTR33	tagging	partial	CCDC14	protein_coding	0.0516	0.0352	0.0332	0.0042	0.0057	0.008
chr8:102956773-102957155	LTR33	tagging	partial	NCALD	protein_coding	0.0044	2.1355	1.8512	1.4335	0.7389	0.0023
chr3:169714288-169714442	LTR33	tagging	partial	SEC62	protein_coding	0.932	1.3817	1.8328	0.4266	1.5858	2.2831
chr4:84014287-84014725	LTR33	tagging	partial	PLAC8	protein_coding	0	0	0	0	0.0722	0.9959
chr5:95053309-95053451	LTR33	tagging	partial	RHOBTB3	protein_coding	0.2048	1.1891	11.9429	9.1805	0.8215	0.1075
chr5:96111212-96111658	LTR33	tagging	partial	ERAP1	protein_coding	0	0	0.9795	0	0	0
chr10:38118114-38118345	LTR33	tagging	partial	ZNF248	protein_coding	0.3187	0.4977	0.016	0	0.2233	0.0528
chr5:138855326-138855539	LTR33	tagging	partial	TMEM173	protein_coding	0	0.1336	0	0	0	0
chr5:150242340-150242406	LTR33	tagging	partial	IRGM	protein_coding	0	1.385	1.8907	0.2866	0.6184	0
chr6:26375482-26375872	LTR33	tagging	partial	BTN3A2	protein_coding	0	0.0029	0.0022	0	0.0417	0.0024
chr6:82555212-82555426	LTR33	tagging	partial	RP11-379B8.1	lincRNA	2.9309	3.9991	2.2356	2.1973	1.6962	0.0887
chr11:75443308-75443512	LTR33	tagging	partial	MOGAT2	protein_coding	0	0	0	0	0	0.0548
chr7:153888-154303	LTR33	tagging	partial	AC093627.10	lincRNA	0	0	0	0.0742	0	0
chr7:99076366-99076800	LTR33	tagging	partial	ZNF789	protein_coding	0.0857	0.1084	0.1472	0.073	1.0135	0.164
chr7:128331353-128331442	LTR33	tagging	partial	RP11-274B21.9	lincRNA	0	0	0	0	0.0532	0.0169
chr7:149941668-149941802	LTR33	tagging	partial	ACTR3C	protein_coding	0	0.0017	0.1135	0	0	0
chr7:149941827-149942013	LTR33	tagging	partial	ACTR3C	protein_coding	0	0.0017	0.1135	0	0	0
chr10:97629462-97629532	LTR33	tagging	partial	C10orf131	protein_coding	0.0018	0.1458	0.0392	0.0159	0.0352	0.2024
chr10:131866312-131866515	LTR33	tagging	partial	LINC00959	lincRNA	0	0.0039	0	0	0	0
chr11:93542117-93542582	LTR33	tagging	partial	MED17	protein_coding	0.6627	0.0153	0.0113	0.0041	4.4555	2.6148
chr12:25146634-25146997	LTR33	tagging	partial	C12orf77	protein_coding	0.3089	4.772	2.4671	2.2634	0.3523	0
chr12:31825641-31825835	LTR33	tagging	partial	METTL20	protein_coding	1.2094	0.948	0.6652	0.2756	0.5165	0.2419
chr18:49086983-49087193	LTR33	tagging	partial	RP11-267C16.1	lincRNA	0	0	0	0	0.3795	0
chr12:123461788-123461927	LTR33	tagging	partial	ARL6IP4	protein_coding	0	0	0	0.0122	0.6354	0.1187
chr12:133499179-133499394	LTR33	tagging	partial	GOLGA3	protein_coding	0	0.0981	0.0023	0	0.2657	0.2133
chr14:105127681-105127818	LTR33	tagging	partial	RP11-982M15.7	lincRNA	0.1048	0.2586	0.0802	0.0606	0.1314	0.0024
chr15:31849546-31849958	LTR33	tagging	partial	OTUD7A	protein_coding	0.0515	0.7598	0.9145	1.3876	0.1113	0.003
chr15:33355318-33355812	LTR33	tagging	partial	FMN1	protein_coding	2.4069	0.9122	1.1712	0.412	0.111	0.0148
chr15:49936678-49937139	LTR33	tagging	partial	DTWD1	protein_coding	4.8194	0.8951	2.0319	0.7395	0.0425	3.0835
chr16:58469623-58469827	LTR33	tagging	partial	RP11-481J2.2	lincRNA	0.0997	0	0	0.3393	0.9192	0
chr16:50668924-50669353	LTR33	tagging	partial	NKD1	protein_coding	0.1844	1.6853	0.9986	0.1574	0.9082	0.1149
chr19:36685545-36685852	LTR33	tagging	partial	ZNF565	protein_coding	0	0.0991	0.0609	0	0	0.1478
chr19:41937776-41937847	LTR33	tagging	partial	ATP5SL	protein_coding	1.4355	2.8525	2.9444	0.5838	3.1585	2.875
chr17:56169922-56170120	LTR33	tagging	partial	DYNLL2	protein_coding	0.0522	0.6182	0.2778	0.5198	10.5132	2.3453
chr20:50448855-50449290	LTR33	tagging	partial	RP5-1112F19.2	lincRNA	0	0	0	0	0	0
chr20:58663765-58663811	LTR33A	5' exon	partial	RP5-1043L13.1	lincRNA	0	0.4234	0	2.471	0	0
chr2:66909709-66910124	LTR33A	3' exon	full	AC007392.3	lincRNA	0	0	1.2313	0	0	0
chr3:39544231-39544546	LTR33A	3' exon	partial	MOBP	protein_coding	0	0.0231	0	0.5899	1.5722	0.1129
chr7:107256471-107256891	LTR33A	3' exon	partial	BCAP29	protein_coding	0.0528	0.8173	1.9601	0	0	4.3224
chr11:12984194-12984650	LTR33A	3' exon	partial	LINC00958	lincRNA	0	0.7264	0	0	0.5034	0
chr2:47739803-47739930	LTR33A	tagging	partial	MSH2	protein_coding	0	0	0	0	0.1472	1.5801
chr2:238373144-238373336	LTR33A	tagging	partial	AC112721.2	lincRNA	0.9256	0.7352	0.8349	0.3142	0.0248	0
chr2:238373670-238373988	LTR33A	tagging	partial	AC112721.2	lincRNA	0.9256	0.7352	0.8349	0.3142	0.0248	0
chr5:33986639-33987068	LTR33A	tagging	partial	AMACR	protein_coding	0.1352	0.1744	0.0097	0.0674	0.0175	0.4128
chr10:115489830-115490287	LTR33A	tagging	partial	CASP7	protein_coding	0.0428	0.7115	0.1017	0.1826	0.0131	2.1047
chr19:58866380-58866565	LTR33A	tagging	partial	ZNF497	protein_coding	0	0.2375	0.0709	0.0811	1.1048	0.3408
chr16:68357905-68358113	LTR33A	tagging	partial	PRMT7	protein_coding	0	0	0	0	0.0137	0
chr18:1368364-1368408	LTR33A	tagging	partial	LINC00470	lincRNA	0.0401	0	0.1146	0.0094	1.1281	0.955
chr20:35522177-35522520	LTR33A	tagging	partial	TLDC2	protein_coding	27.4205	14.5983	23.7484	9.8307	1.4449	1.5296
chr19:39671970-39672173	LTR33A	tagging	partial	PAK4	protein_coding	0.0465	0.756	0.2701	0.6113	0.8118	0.2701
chr17:72078519-72078959	LTR33A_	3' exon	full	RP11-101O21.1	lincRNA	0	0.3719	1.8867	1.6908	0.0738	0
chr3:101055765-101056241	LTR33A_	3' exon	partial	SENP7	protein_coding	0.4197	0.5065	0.4382	0	0.2218	0
chr4:120142618-120143046	LTR33A_	3' exon	partial	USP53	protein_coding	0	0.0178	0.0937	0	0.0524	0.0634
chr7:82428850-82429131	LTR33A_	3' exon	partial	PCLO	protein_coding	28.9648	17.6606	4.9308	0.4182	0.0078	0
chr5:7150688-7150955	LTR33A_	internal exon	partial	RP11-122F24.1	lincRNA	0.1513	1.4448	1.9018	14.9658	0.0517	0
chr12:113646275-113646708	LTR33A_	internal exon	partial	IQCD	protein_coding	0.9085	0.8606	1.6632	0.5428	1.2447	0
chr2:42983148-42983604	LTR33A_	tagging	partial	MTA3	protein_coding	0.0019	0.1377	0.2068	0.1174	0.0358	0.024
chr3:68933305-68933667	LTR33A_	tagging	partial	FAM19A4	protein_coding	1.4322	2.8303	1.987	1.0884	0.5877	0
chr6:150050445-150050625	LTR33A_	tagging	partial	NUP43	protein_coding	0.0758	0.2935	0.592	0.0425	0	0.2229
chr11:84397828-84398175	LTR33A_	tagging	partial	DLG2	protein_coding	1.3536	0.386	0.8816	0.2993	0	0
chr19:42882259-42882539	LTR33A_	tagging	partial	MEGF8	protein_coding	0	0	0	0	0.0135	0.057
chr21:43132630-43132823	LTR33A_	tagging	partial	LINC00479	lincRNA	0	0	0	0	0.0502	0.0579
chr15:100885128-100885288	LTR33A_	tagging	partial	SPATA41	lincRNA	0.0116	0.0375	0.0609	0.2933	0	0
chr12:18293745-18293950	LTR33B	5' exon	partial	RERGL	protein_coding	0.3243	2.7194	6.0974	4.3721	4.2896	0
chr22:47732824-47733251	LTR33B	3' exon	partial	CITF22-49D8.1	lincRNA	0.179	3.579	2.2406	1.9429	0.9653	0
chr12:12040816-12041025	LTR33B	3' exon	partial	ETV6	protein_coding	0	0	0.5872	0	0	0
chr17:44634593-44635014	LTR33B	3' exon	partial	ARL17A	protein_coding	0.0759	0.2939	0.3163	0.0199	0.8237	0.1614
chr10:92211215-92211654	LTR33B	internal exon	partial	RP11-15K3.1	lincRNA	0	1.5404	0	0	0.1962	0
chr22:27169835-27170266	LTR33B	internal exon	partial	CTA-211A9.5	lincRNA	0	0	0	0	1.0124	0
chr5:148009713-148009787	LTR33B	tagging	partial	HTR4	protein_coding	0	0	0	0.0049	0	0
chr4:100732740-100732789	LTR33B	tagging	partial	DAPP1	protein_coding	2.0893	3.2903	2.6088	0	0	0
chr5:148009426-148009542	LTR33B	tagging	partial	HTR4	protein_coding	0	0	0	0.0049	0	0
chr6:132778023-132778374	LTR33B	tagging	partial	STX7	protein_coding	1.1867	1.2313	1.3115	0.529	0.0375	0.6078
chr14:88175952-88176148	LTR33B	tagging	partial	RP11-1152H15.1	lincRNA	0.273	1.6654	1.8374	0.9708	0.1192	0
chr17:48562603-48562862	LTR33B	tagging	partial	RSAD1	protein_coding	0.0442	0.3209	0.2947	0.0077	1.8963	5.7851
chr17:48562892-48563000	LTR33B	tagging	partial	RSAD1	protein_coding	0.0442	0.3209	0.2947	0.0077	1.8963	5.7851
chr19:44890490-44890632	LTR33B	tagging	partial	ZNF229	protein_coding	0.1818	3.6514	2.6074	1.3218	0.396	0.4642
chr1:3831853-3832068	LTR33C	tagging	partial	LINC01134	lincRNA	0	0.0124	0.0779	0	0.0016	0
chr2:135227049-135227170	LTR33C	tagging	partial	TMEM163	protein_coding	0.0156	0.2419	0.2016	0.0377	0.109	0
chr19:2854484-2854657	LTR33C	tagging	partial	ZNF555	protein_coding	0.2924	4.142	5.0818	2.6564	1.4533	0.2655
chr12:106137436-106137739	LTR33C	tagging	partial	CASC18	lincRNA	8.5345	7.3882	7.1577	1.2818	0.2751	0.0031
chr19:12572955-12573218	LTR33C	tagging	partial	ZNF443	protein_coding	0.018	0.251	0.104	0	0.4333	0.7149
chr19:9405173-9405343	LTR33C	tagging	partial	ZNF699	protein_coding	0.0026	0.0264	0.0024	0	0.111	0.0108
chr19:11728893-11729003	LTR33C	tagging	partial	ZNF627	protein_coding	0.0865	0.3563	0.17	0.0391	1.6257	0.2226
chr5:103520787-103521254	LTR40a	3' exon	partial	RP11-138J23.1	lincRNA	0	0	0.6435	0	0	0
chr6:71136308-71136756	LTR40a	3' exon	partial	FAM135A	protein_coding	0	0	0	0	1.7269	0.0511
chr21:38605466-38605613	LTR40a	3' exon	partial	DSCR3	protein_coding	1.1727	0.7564	1.1593	3.6956	4.3261	1.8937
chr7:17619827-17620287	LTR40a	internal exon	partial	AC017060.1	lincRNA	7.8001	3.0788	12.5786	9.2538	1.3312	0.4277
chr8:2452594-2452802	LTR40a	internal exon	partial	RP11-378A12.1	lincRNA	0	0	0	0	0.3178	0.1029
chr1:210804372-210804492	LTR40a	tagging	partial	HHAT	protein_coding	0.0408	0.6839	0.1165	0.0571	0.7239	0
chr6:28106425-28106862	LTR40a	tagging	partial	RP1-265C24.8	lincRNA	0	0	0	0	0.0978	0
chr21:43522867-43523374	LTR40a	tagging	partial	C21orf128	protein_coding	0	0.0508	0	0	0	0
chr8:112757404-112757929	LTR40A1	5' exon	full	RP11-58O3.2	lincRNA	0	1.1714	0	0	0	0
chr7:81679548-81679961	LTR40A1	3' exon	full	CACNA2D1	protein_coding	0	0.03	0.5532	0.1302	0	0
chr5:81604785-81604856	LTR40A1	tagging	partial	ATP6AP1L	protein_coding	0.6513	0.5927	2.1963	0.1803	0	0
chr5:81605046-81605397	LTR40A1	tagging	partial	ATP6AP1L	protein_coding	0.6513	0.5927	2.1963	0.1803	0	0
chr8:8486347-8486791	LTR40b	3' exon	partial	RP11-211C9.1	lincRNA	0.0997	0.8529	0.3596	0.4373	0.7021	0
chr8:27169732-27170111	LTR40b	internal exon	partial	PTK2B	protein_coding	0	2.9286	0	1.7602	4.2066	0
chr3:45722865-45723302	LTR40b	tagging	partial	LIMD1	protein_coding	0.0354	0.6568	0.4482	0.1297	0.0346	0.0182
chr7:45023606-45023984	LTR40b	tagging	partial	SNHG15	lincRNA	0	0.1279	0.2694	0.0051	18.6024	17.3233
chr18:18529218-18529640	LTR40b	tagging	partial	ROCK1	protein_coding	0.6959	0.8272	0.7507	0.3171	0.9943	2.1373
chr3:123672033-123672456	LTR40c	tagging	partial	CCDC14	protein_coding	0.0516	0.0352	0.0332	0.0042	0.0057	0.008
chr4:123665321-123665757	LTR40c	tagging	partial	BBS12	protein_coding	0.0645	0.0631	0.1144	0.0156	0.4891	0.0701
chr6:79608583-79609028	LTR40c	tagging	partial	IRAK1BP1	protein_coding	3.2789	1.149	0.5674	0.0142	0.149	0.5717
chr7:30592957-30593400	LTR40c	tagging	partial	GGCT	protein_coding	0.0109	0.0313	0.0184	0.1205	0.0373	0.0036
chr15:68165861-68166511	LTR41	3' exon	full	SKOR1	protein_coding	0.8012	1.3954	2.6696	0.0561	0	0
chr2:75159616-75159808	LTR41	3' exon	partial	AC104135.3	lincRNA	0.5426	2.1723	0.9618	3.6427	0.1788	0.0196
chr2:75159858-75160198	LTR41	3' exon	partial	AC104135.3	lincRNA	0.5426	2.1723	0.9618	3.6427	0.1788	0.0196
chr10:27436458-27437076	LTR41	3' exon	partial	YME1L1	protein_coding	0	0.0742	0.0058	0	1.3153	0.4385
chr18:1275950-1276030	LTR41	internal exon	partial	LINC00470	lincRNA	0	0	0	0	0	5.6168
chr1:224140668-224140821	LTR41	tagging	partial	RP11-504P24.8	lincRNA	0	0.0816	0.0444	0.2611	0.0784	1.3102
chr2:242053007-242053130	LTR41	tagging	partial	PASK	protein_coding	0.2781	0.5466	0.5378	0.34	0.003	0.1436
chr2:242053236-242053291	LTR41	tagging	partial	PASK	protein_coding	0.2781	0.5466	0.5378	0.34	0.003	0.1436
chr3:12926473-12926570	LTR41	tagging	partial	RP11-767C1.1	lincRNA	0	1.344	0.2571	0	3.5957	0.2835
chr4:119552940-119553030	LTR41	tagging	partial	RP11-384K6.6	lincRNA	0	0.0347	0	0	0.0233	0.0196
chr6:114255005-114255116	LTR41	tagging	partial	HDAC2	protein_coding	0.0786	0.2016	0.2389	0.0899	3.7043	4.09
chr17:5012373-5012421	LTR41	tagging	partial	ZNF232	protein_coding	0	0.1757	0.0972	0.0358	1.1856	0.7506
chr19:41937305-41937575	LTR41	tagging	partial	ATP5SL	protein_coding	1.4355	2.8525	2.9444	0.5838	3.1585	2.875
chr6:138272241-138272979	LTR41B	3' exon	full	RP11-240M16.1	lincRNA	0	0	0	4.7915	8.8541	0.2471
chr14:29306613-29307285	LTR41B	3' exon	partial	CTD-2384A14.1	lincRNA	0.1904	0.0567	0.1394	0.6257	0.5999	2.0447
chr4:110453865-110454038	LTR41B	internal exon	partial	SEC24B	protein_coding	4.7998	24.935	34.0217	29.4804	19.3723	6.4678
chr2:47596423-47596623	LTR41B	tagging	partial	EPCAM	protein_coding	0.0314	0.0405	0	0.3846	0.1768	0.0329
chr3:46599155-46599205	LTR41B	tagging	partial	LUZPP1	protein_coding	0	0	0	0	0	0.0499
chr3:46599410-46599650	LTR41B	tagging	partial	LUZPP1	protein_coding	0	0	0	0	0	0.0499
chr3:46599673-46599843	LTR41B	tagging	partial	LUZPP1	protein_coding	0	0	0	0	0	0.0499
chr3:138198279-138198342	LTR41B	tagging	partial	ESYT3	protein_coding	0.1897	0.4154	0.285	0.4205	0.0968	0
chr3:138198545-138198672	LTR41B	tagging	partial	ESYT3	protein_coding	0.1897	0.4154	0.285	0.4205	0.0968	0
chr4:6624475-6624728	LTR41B	tagging	partial	MAN2B2	protein_coding	0	0.0202	0	0.1338	0.0032	0.2399
chrX:154277450-154277530	LTR41B	tagging	partial	FUNDC2	protein_coding	0.3596	0.1038	0.0862	0	1.5366	2.3125
chr6:153309486-153309566	LTR41B	tagging	partial	MTRF1L	protein_coding	0.0947	0.7552	0.8845	0.717	2.2516	1.5793
chr7:30593822-30594496	LTR41B	tagging	partial	GGCT	protein_coding	0.0109	0.0313	0.0184	0.1205	0.0373	0.0036
chr7:30595506-30595617	LTR41B	tagging	partial	GGCT	protein_coding	0.0109	0.0313	0.0184	0.1205	0.0373	0.0036
chr10:44434542-44434738	LTR41B	tagging	partial	LINC00841	lincRNA	0	0	0	0	0	0
chr11:71145817-71146003	LTR41B	tagging	partial	DHCR7	protein_coding	13.7452	25.0513	4.7874	3.2945	4.1815	0.366
chr13:47029294-47029616	LTR41B	tagging	partial	RP11-189B4.6	lincRNA	0	0	0	0	0	0.5395
chr20:62337104-62337555	LTR42	5' exon	partial	ARFRP1	protein_coding	0	0.009	0.0662	0.0049	0.0581	0.2372
chr1:228292056-228292545	LTR42	tagging	partial	C1orf35	protein_coding	0	0.2083	0.1765	0.3727	0.1102	0.4456
chr3:46558047-46558500	LTR42	tagging	partial	LRRC2	protein_coding	0	0	0	0.0013	0	0.1355
chr15:24571285-24571369	LTR47A	5' exon	partial	PWRN1	lincRNA	0	0	0.4698	0.2765	0.0842	0
chr2:120096153-120096574	LTR47A	3' exon	partial	C2orf76	protein_coding	0	0.441	0	0.0184	0.7539	0
chr3:112721206-112721503	LTR47A	3' exon	partial	C3orf17	protein_coding	3.28	9.0844	10.0936	5.9978	4.7806	5.0448
chr3:106858161-106858496	LTR47A	internal exon	partial	LINC00882	lincRNA	0	0	1.5373	0	0	0
chr3:112721523-112721627	LTR47A	tagging	partial	C3orf17	protein_coding	3.28	9.0844	10.0936	5.9978	4.7806	5.0448
chr13:101090701-101091095	LTR47B	5' exon	full	PCCA	protein_coding	2.8964	1.1109	0.5216	0	2.0842	0.3287
chr15:24778463-24778892	LTR47B	5' exon	partial	PWRN1	lincRNA	0	0	0.1759	0.1294	0	0.0554
chr14:71076069-71076492	LTR47B	tagging	partial	MED6	protein_coding	0.032	0	0.1371	0	0	0
chr1:6260625-6261133	LTR50	5' exon	partial	RPL22	protein_coding	0.1731	0.1489	0.6959	0.741	0.788	5.412
chr1:59529004-59529660	LTR50	3' exon	full	RP11-145M4.2	lincRNA	0	0	0.3365	0	0	0
chr1:230227315-230227441	LTR50	3' exon	partial	GALNT2	protein_coding	0.2755	0.2567	0	0.1393	0.397	0.5944
chr1:230227571-230227823	LTR50	3' exon	partial	GALNT2	protein_coding	0.2755	0.2567	0	0.1393	0.397	0.5944
chr5:109753656-109753966	LTR50	3' exon	partial	TMEM232	protein_coding	0.6376	0.5776	1.0461	0	0	0
chr16:24483994-24484175	LTR50	3' exon	partial	CTD-2313J23.1	lincRNA	0	0	0	0.0143	0.0865	0.0849
chr21:19933543-19933643	LTR50	3' exon	partial	AL109763.2	lincRNA	0	0	0	0	0.4736	0.6362
chr11:13007423-13007674	LTR50	internal exon	partial	LINC00958	lincRNA	0	0	0	0.2271	4.4944	0.2042
chr6:42981126-42981210	LTR50	internal exon	partial	MEA1	protein_coding	1.4612	0.5751	1.2967	5.5327	38.8433	19.8863
chr15:59907226-59907797	LTR50	internal exon	partial	GCNT3	protein_coding	0	0.1091	0.4027	0	0	0
chr1:2568006-2568104	LTR50	tagging	partial	TTC34	protein_coding	0.0073	0.0658	0	0.0255	0.0006	0.0019
chr1:55118982-55119037	LTR50	tagging	partial	TTC4	protein_coding	0	0	0	0	0.0972	0
chr2:39827770-39827864	LTR50	tagging	partial	TMEM178A	protein_coding	5.048	2.2407	1.848	0.7826	0.0501	0.0034
chr7:23454250-23454432	LTR50	tagging	partial	IGF2BP3	protein_coding	0	0	0	0.2116	0.1392	0
chr3:44481556-44481720	LTR50	tagging	partial	ZNF445	protein_coding	0.1511	1.1881	1.1001	0.5711	0.0954	0.0805
chr3:138198332-138198421	LTR50	tagging	partial	ESYT3	protein_coding	0.1897	0.4154	0.285	0.4205	0.0968	0
chr5:109753448-109753515	LTR50	tagging	partial	TMEM232	protein_coding	0.6376	0.5776	1.0461	0	0	0
chr10:13681713-13682293	LTR50	tagging	partial	PRPF18	protein_coding	0.0012	0	0	0.0129	0.1827	0
chr12:3900513-3900698	LTR50	tagging	partial	PARP11	protein_coding	0	0	0	0	0.2785	0
chr12:3900868-3901117	LTR50	tagging	partial	PARP11	protein_coding	0	0	0	0	0.2785	0
chr12:125836038-125836559	LTR50	tagging	partial	TMEM132B	protein_coding	7.2553	9.8388	8.7834	5.4531	0.7547	0.0091
chr16:24484486-24484501	LTR50	tagging	partial	CTD-2313J23.1	lincRNA	0	0	0	0.0143	0.0865	0.0849
chr16:24484628-24484663	LTR50	tagging	partial	CTD-2313J23.1	lincRNA	0	0	0	0.0143	0.0865	0.0849
chr16:24484811-24484859	LTR50	tagging	partial	CTD-2313J23.1	lincRNA	0	0	0	0.0143	0.0865	0.0849
chr16:68358225-68358410	LTR50	tagging	partial	PRMT7	protein_coding	0	0	0	0	0.0137	0
chr17:15340119-15340808	LTR50	tagging	partial	TVP23C	protein_coding	0	0.0844	0.1602	0.1178	2.2715	1.4258
chr11:129817421-129817808	LTR52	5' exon	full	PRDM10	protein_coding	0.3562	5.0546	6.8359	7.753	3.2925	0
chr18:45410215-45410616	LTR52	3' exon	partial	SMAD2	protein_coding	3.7182	5.2908	4.6601	4.9397	1.4573	0.0588
chr2:170521401-170521773	LTR52	internal exon	partial	CCDC173	protein_coding	0.4983	1.0286	0.6325	0.5584	1.168	0.0349
chr4:178764172-178764464	LTR52	internal exon	partial	LINC01098	protein_coding	0	1.3336	0.3473	0.1065	0.166	0
chr5:115234101-115234476	LTR52	internal exon	partial	AP3S1	protein_coding	0	0	0	0	1.6982	0.8619
chr10:14984418-14984504	LTR52	internal exon	partial	DCLRE1C	protein_coding	0.1269	0	0	0.711	0	0.111
chr19:53737791-53738046	LTR52	internal exon	partial	ZNF677	protein_coding	0.0244	0.1765	0.0171	0.0011	0.6572	0.831
chr4:132350965-132351062	LTR52	tagging	partial	RP11-314N14.1	lincRNA	0.1168	0.2651	0.8271	0	0.0016	0
chr10:43947608-43947850	LTR52	tagging	partial	ZNF487	protein_coding	0.0149	0	0	0.0122	0.5886	1.1563
chr10:43948108-43948268	LTR52	tagging	partial	ZNF487	protein_coding	0.0149	0	0	0.0122	0.5886	1.1563
chr10:43949018-43949030	LTR52	tagging	partial	ZNF487	protein_coding	0.0149	0	0	0.0122	0.5886	1.1563
chr11:93496556-93496629	LTR52	tagging	partial	C11orf54	protein_coding	0.0337	0.0163	0	0.0015	0.1523	0.811
chr11:93496937-93497163	LTR52	tagging	partial	C11orf54	protein_coding	0.0337	0.0163	0	0.0015	0.1523	0.811
chr11:93497278-93497394	LTR52	tagging	partial	C11orf54	protein_coding	0.0337	0.0163	0	0.0015	0.1523	0.811
chr17:79640547-79640704	LTR52	tagging	partial	CCDC137	protein_coding	0.286	1.0568	0.4338	0.9369	2.4537	0.8344
chr19:37237635-37237758	LTR52	tagging	partial	ZNF850	protein_coding	0.7231	1.5624	1.037	1.2773	0.908	0.6674
chr12:7901592-7901867	LTR53	5' exon	partial	CLEC4C	protein_coding	2.943	0.8275	0.431	0.687	0.1996	0.198
chr19:44433875-44434116	LTR53	3' exon	partial	ZNF45	protein_coding	0	0	3.1245	0	0	0
chr11:71185840-71186181	LTR53	internal exon	partial	NADSYN1	protein_coding	0	0.0215	0.0792	0	0	0
chr14:59940841-59941240	LTR57	5' exon	partial	CCDC175	protein_coding	1.1283	0	0.2071	3.8651	0.3294	0.0571
chr16:53500000-53500077	LTR57	3' exon	partial	RBL2	protein_coding	0	0	0.0772	0.1561	0	0
chr16:53499627-53500000	LTR57	tagging	partial	RBL2	protein_coding	0	0	0.0772	0.1561	0	0
chr7:146948071-146948523	LTR62	5' exon	full	CNTNAP2	protein_coding	8.0824	10.9029	11.9901	5.4879	2.8568	0.2153
chr3:141030886-141031577	LTR62	5' exon	partial	ZBTB38	protein_coding	0	0	0.6665	0.1337	0	0
chr22:47879941-47880456	LTR62	3' exon	partial	LL22NC03-75H12.2	protein_coding	0.1424	2.3419	1.8072	0.9057	0.7452	0.0125
chr22:47879889-47879954	LTR62	tagging	partial	LL22NC03-75H12.2	protein_coding	0.1424	2.3419	1.8072	0.9057	0.7452	0.0125
chr19:20615404-20615710	LTR66	5' exon	partial	CTC-513N18.6	lincRNA	0	0	0	0	1.5546	0
chr3:75727933-75728346	LTR66	3' exon	partial	LINC00960	lincRNA	0	0.0187	0	0.0101	0.1431	0.4402
chr14:29400603-29401224	LTR67B	5' exon	full	CTD-2384A14.1	lincRNA	0	0.3315	2.5688	0	0	0
chr20:7050240-7050474	LTR67B	5' exon	full	RP4-764O22.1	lincRNA	2.102	5.9657	9.1246	1.9432	2.4682	0
chr13:30951026-30951317	LTR67B	5' exon	partial	LINC00426	lincRNA	0	0	0	0	0.6267	0
chr11:17356018-17356142	LTR67B	5' exon	partial	NUCB2	protein_coding	0	0	0	0.0235	0.0019	0
chr19:50382689-50382836	LTR67B	5' exon	partial	TBC1D17	protein_coding	0	0.0092	0	0	0.0803	0
chr7:104602275-104602567	LTR67B	3' exon	full	RP11-325F22.2	lincRNA	0	1.3016	0	0	1.5034	0
chr4:14384589-14384811	LTR67B	3' exon	partial	AC006296.2	lincRNA	0	0.7465	0.9322	0.2182	0	0
chr5:104308996-104309614	LTR67B	3' exon	partial	RP11-6N13.1	lincRNA	0.3017	0.4727	0.5642	0	0	0.3167
chr18:57265353-57265519	LTR67B	3' exon	partial	CCBE1	protein_coding	0	0.5115	0.5995	0	0.7165	0
chr15:82556984-82557116	LTR67B	3' exon	partial	FAM154B	protein_coding	0	0	0	0	1.9069	0
chr12:72585000-72585285	LTR67B	3' exon	partial	TRHDE	protein_coding	0.794	1.6473	0.9585	0.0917	0	0
chr15:48635546-48635613	LTR67B	3' exon	partial	DUT	protein_coding	0.101	1.0819	0.5964	0.9129	15.8502	21.096
chr18:57265648-57265819	LTR67B	3' exon	partial	CCBE1	protein_coding	0	0.5115	0.5995	0	0.7165	0
chr5:25136532-25136604	LTR67B	internal exon	partial	RP11-549K20.1	lincRNA	0	0.169	0	0	2.1682	0.4124
chr1:33611465-33611572	LTR67B	tagging	partial	TRIM62	protein_coding	6.4679	4.748	2.0041	3.0327	1.0594	0.0891
chr1:33611718-33611862	LTR67B	tagging	partial	TRIM62	protein_coding	6.4679	4.748	2.0041	3.0327	1.0594	0.0891
chr1:113946278-113946509	LTR67B	tagging	partial	MAGI3	protein_coding	4.3618	3.8719	1.4731	0	3.8571	1.3744
chr1:192982268-192982537	LTR67B	tagging	partial	UCHL5	protein_coding	0.7392	0.5891	0.8507	0.6753	0.0482	2.1329
chr3:27873323-27873891	LTR67B	tagging	partial	AC098973.1	lincRNA	0	0	0.0409	0	0	0
chr4:129958404-129958611	LTR67B	tagging	partial	SCLT1	protein_coding	0.3067	0.172	0.0973	0.0031	0	0.0467
chr7:104602607-104602775	LTR67B	tagging	partial	RP11-325F22.2	lincRNA	0	1.3016	0	0	1.5034	0
chr8:90946599-90946821	LTR67B	tagging	partial	NBN	protein_coding	1.4895	0.9376	1.3638	0.509	0.0572	2.1443
chr12:113408878-113409256	LTR67B	tagging	partial	OAS3	protein_coding	0.1678	0.8684	1.469	0.5454	0.2425	0.013
chr12:124066774-124066852	LTR67B	tagging	partial	RP11-486O12.2	lincRNA	0	0	0	0	0.0564	0
chr21:45881836-45881948	LTR67B	tagging	partial	LRRC3DN	protein_coding	0	0	0	0	0	0.0757
chr18:18528605-18529173	LTR67B	tagging	partial	ROCK1	protein_coding	0.6959	0.8272	0.7507	0.3171	0.9943	2.1373
chr16:90000154-90000277	LTR67B	tagging	partial	TCF25	protein_coding	0	0	0	1.1433	0.0697	0
chr19:50382593-50382633	LTR67B	tagging	partial	TBC1D17	protein_coding	0	0.0092	0	0	0.0803	0
chr19:45791118-45791213	LTR67B	tagging	partial	PPP1R37	protein_coding	0.0062	0.1509	0.1231	0.2027	0.433	0
chr22:22868204-22868406	LTR67B	tagging	partial	ZNF280A	protein_coding	0.0069	0.0268	0.033	0.4804	108.381	10.5921
chr11:118880151-118880420	LTR75	5' exon	partial	CCDC84	protein_coding	0.0315	0.0339	0.005	0.1287	0.3979	0.5346
chr4:132351115-132351632	LTR75	3' exon	partial	RP11-314N14.1	lincRNA	0.1168	0.2651	0.8271	0	0.0016	0
chr2:239134031-239134066	LTR75	tagging	partial	AC016757.3	protein_coding	0.0958	0	0	0	0.0747	0
chr2:235123865-235124248	LTR79	5' exon	full	RP11-309M7.1	lincRNA	0.147	0.5689	0.8862	0.5147	2.3749	0
chr4:46911138-46911474	LTR79	5' exon	full	COX7B2	protein_coding	0	0	0	0	15.3551	110.898
chr2:240500498-240500722	LTR79	5' exon	partial	AC079612.1	protein_coding	0	0	0	0.665	0.0522	0
chr5:53115328-53115397	LTR79	5' exon	partial	CTD-2081C10.1	lincRNA	0.156	0	0	0	2.236	0
chr18:22307720-22308102	LTR79	5' exon	partial	RP11-449D8.5	lincRNA	0	0.033	1.9986	0.8607	0	0
chr3:4356001-4356167	LTR79	3' exon	partial	SETMAR	protein_coding	1.1675	0.2861	0.7754	0.206	0.4711	0.9025
chr3:19324268-19324692	LTR79	3' exon	partial	KCNH8	protein_coding	1.9552	0.9248	1.582	0.0685	0.5561	0
chr4:80496271-80496425	LTR79	3' exon	partial	LINC00989	lincRNA	0.244	0	0.3131	0.0074	0.096	0.0278
chr8:29962526-29962743	LTR79	3' exon	partial	DCTN6	protein_coding	0	0	0.3846	0	0	0
chr9:111712848-111713284	LTR79	3' exon	partial	FAM206A	protein_coding	0	0	0	0	0.2247	0
chr11:61422096-61422200	LTR79	3' exon	partial	RP11-855O10.3	lincRNA	0	0	0	0	0	0.2635
chr12:47046189-47046442	LTR79	3' exon	partial	RP11-446N19.1	lincRNA	0	0	0	0	0	0
chr20:46335334-46335686	LTR79	3' exon	partial	SULF2	protein_coding	7.455	3.1009	4.2448	4.2694	2.836	0.0366
chr1:239655822-239656124	LTR79	internal exon	partial	CHRM3	protein_coding	5.4347	1.3312	0	0	1.9725	0
chr2:203709136-203709490	LTR79	internal exon	partial	ICA1L	protein_coding	0	0	1.1308	0	0	0
chr9:93147785-93147884	LTR79	internal exon	partial	RP11-389K14.3	lincRNA	0.0719	0.4331	0.5707	0.2435	0.0614	0
chr11:19350937-19351054	LTR79	internal exon	partial	NAV2	protein_coding	0	0	2.6429	0	0.459	0
chr11:19351087-19351271	LTR79	internal exon	partial	NAV2	protein_coding	0	0	2.6429	0	0.459	0
chr12:97427085-97427251	LTR79	internal exon	partial	RP11-397H6.1	lincRNA	0	0	0	0	0.3358	0
chr18:50455060-50455175	LTR79	internal exon	partial	DCC	protein_coding	0	0	1.1844	0.6421	0	0
chr1:3832616-3832719	LTR79	tagging	partial	LINC01134	lincRNA	0	0.0124	0.0779	0	0.0016	0
chr2:37323652-37323769	LTR79	tagging	partial	GPATCH11	protein_coding	0.1346	0.081	0.2476	0.0141	1.8608	1.0569
chr2:37323859-37324012	LTR79	tagging	partial	GPATCH11	protein_coding	0.1346	0.081	0.2476	0.0141	1.8608	1.0569
chr2:183379677-183379837	LTR79	tagging	partial	PDE1A	protein_coding	1.9426	4.2691	2.8039	0.8427	1.0777	0
chr4:178733109-178733226	LTR79	tagging	partial	LINC01098	protein_coding	0.2517	4.0948	3.1781	1.7157	0.2875	0.1024
chr11:61422348-61422453	LTR79	tagging	partial	RP11-855O10.3	lincRNA	0	0	0	0	0	0.2635
chr8:128076966-128077126	LTR79	tagging	partial	PCAT1	lincRNA	0.0163	1.064	0.7774	0.7206	0.5101	0
chr14:56025841-56025952	LTR79	tagging	partial	KTN1	protein_coding	0	0	0	0	0.8828	0.0905
chr9:108538565-108538642	LTR79	tagging	partial	TMEM38B	protein_coding	2.575	0.3709	0.2029	0.0347	0.7943	3.8631
chrX:57017610-57017689	LTR79	tagging	partial	SPIN3	protein_coding	0.1636	3.3244	6.7987	8.0896	1.9589	0.0043
chr10:106056413-106056530	LTR79	tagging	partial	GSTO2	protein_coding	0.0141	0.0474	0.0269	0	0.3521	3.4557
chr10:106056835-106057208	LTR79	tagging	partial	GSTO2	protein_coding	0.0141	0.0474	0.0269	0	0.3521	3.4557
chr11:82970562-82970700	LTR79	tagging	partial	CCDC90B	protein_coding	0.28	1.197	1.6694	0.447	0.29	4.1671
chr11:82970897-82971199	LTR79	tagging	partial	ANKRD42	protein_coding	0.7899	0.7987	3.8412	0.142	0.1457	0.1345
chr15:86078110-86078222	LTR79	tagging	partial	AKAP13	protein_coding	0.006	0.0026	0.0456	0.007	0.1689	0.0126
chr20:34560717-34561161	LTR79	tagging	partial	CNBD2	protein_coding	0	0.0264	0	0	0.3565	0.0614
chr21:39426798-39426943	LTR79	tagging	partial	DSCR4	protein_coding	0.0536	0.0345	0.051	0.5188	0	0
chr9:118093088-118093657	LTR80B	3' exon	partial	DEC1	protein_coding	0.0729	1.0427	0.0063	0.2691	0.052	0
chr5:150231285-150231752	LTR80B	tagging	partial	IRGM	protein_coding	1.4489	1.2106	2.1388	0.1702	0.0647	0
chr2:63027710-63028567	LTR82A	tagging	partial	EHBP1	protein_coding	0.8916	0.8273	0.9271	0.0144	0.2142	0
chr2:85285957-85286359	LTR82A	tagging	partial	KCMF1	protein_coding	0.5588	4.7409	3.5958	2.4093	0.7215	1.8762
chr4:120218940-120219016	LTR82A	tagging	partial	C4orf3	protein_coding	1.3085	0.6101	0.7654	0.0607	0.7883	11.8855
chr5:86121397-86122174	LTR82A	tagging	partial	CTC-493L21.1	lincRNA	0.0115	0.6241	0.4825	0	0	0
chr2:120314720-120315295	LTR82B	internal exon	partial	PCDP1	protein_coding	0	0.0662	0	0	0	0
chr5:81637314-81637972	LTR82B	internal exon	partial	ATP6AP1L	protein_coding	0	0	0	0	0	0
chr18:3722120-3722824	LTR83	3' exon	partial	DLGAP1	protein_coding	0	0.274	0	0.2615	0	0
chr2:27265303-27265397	LTR83	tagging	partial	AGBL5	protein_coding	0	0.095	0	0	0.2262	0
chr2:113345190-113345452	LTR83	tagging	partial	CHCHD5	protein_coding	0.1793	0.3313	0.2129	0.214	1.5954	2.5076
chr2:113345926-113346065	LTR83	tagging	partial	CHCHD5	protein_coding	0.1793	0.3313	0.2129	0.214	1.5954	2.5076
chr5:173431877-173432522	LTR83	tagging	partial	C5orf47	protein_coding	3.0277	1.6739	1.4062	0.2901	0.3966	0.0616
chr7:40257354-40257530	LTR83	tagging	partial	SUGCT	protein_coding	0	0	0	0	0.1334	0
chr16:30457084-30457148	LTR83	tagging	partial	SEPHS2	protein_coding	5.788	4.5531	1.5732	0.8694	7.1126	17.4331
chr16:30457213-30457301	LTR83	tagging	partial	SEPHS2	protein_coding	5.788	4.5531	1.5732	0.8694	7.1126	17.4331
chr18:40583248-40583434	LTR84a	internal exon	partial	RIT2	protein_coding	0	0	4.0003	1.167	0	0
chr3:14242299-14242353	LTR84a	tagging	partial	LSM3	protein_coding	7.568	1.7634	2.9158	2.2688	3.1531	24.7143
chr3:14242465-14242521	LTR84a	tagging	partial	LSM3	protein_coding	7.568	1.7634	2.9158	2.2688	3.1531	24.7143
chr3:124463194-124463247	LTR84a	tagging	partial	UMPS	protein_coding	0.1212	2.8973	2.461	3.9379	5.8627	16.553
chr3:124463555-124463905	LTR84a	tagging	partial	UMPS	protein_coding	0.1212	2.8973	2.461	3.9379	5.8627	16.553
chrX:46357767-46357912	LTR84a	tagging	partial	ZNF674	protein_coding	0.0132	0.1509	0.1545	0.0172	0.0451	0.0812
chr13:44448998-44449457	LTR84b	5' exon	partial	CCDC122	protein_coding	0	0	0	0	0.5743	0
chr4:16974536-16975064	LTR84b	3' exon	partial	RP11-141E13.1	lincRNA	0.2293	1.1833	0	0	0	0
chr6:76001041-76001460	LTR84b	3' exon	partial	RP1-234P15.4	lincRNA	0	0.143	0	0.1466	1.3704	0.2844
chr6:112075250-112075961	LTR84b	internal exon	partial	FYN	protein_coding	0	0	0	0	0	0
chr12:96403399-96403688	LTR84b	internal exon	partial	LTA4H	protein_coding	9.5462	6.1912	8.7995	4.4043	0.5436	0.23
chr6:2990535-2990635	LTR84b	tagging	partial	NQO2	protein_coding	0	0.1708	0.3414	0.029	0.0141	0.2403
chr6:25986003-25986055	LTR84b	tagging	partial	TRIM38	protein_coding	0	0	0.0016	0.0012	2.3695	0.3581
chr6:41036848-41037392	LTR84b	tagging	partial	UNC5CL	protein_coding	1.4341	0.7448	0.7624	0.9522	2.9858	2.2482
chr6:84672971-84673272	LTR84b	tagging	partial	CYB5R4	protein_coding	0.0224	0.0624	0.0358	0.0013	0.197	0.5765
chr6:114261073-114261188	LTR84b	tagging	partial	HDAC2	protein_coding	0.0786	0.2016	0.2389	0.0899	3.7043	4.09
chr12:96403903-96404046	LTR84b	tagging	partial	LTA4H	protein_coding	0	0	0	0	0.1158	0
chr22:29563420-29563724	LTR84b	tagging	partial	KREMEN1	protein_coding	0	0.0136	0.0503	0	0	0
chr10:28570874-28571298	LTR86A1	5' exon	full	MPP7	protein_coding	0.3168	0.0681	0.1508	0.4067	0	0
chr2:47675587-47675717	LTR86A1	3' exon	partial	MSH2	protein_coding	0.0869	0	0.8001	1.1772	1.286	3.985
chr12:29593591-29593975	LTR86A1	3' exon	partial	OVCH1	protein_coding	0.1273	1.8885	1.2118	1.4487	2.0857	0
chr5:93071530-93071986	LTR86A1	tagging	partial	FAM172A	protein_coding	0	0	0	0	0.0342	0
chr6:49398629-49398849	LTR86A1	tagging	partial	MUT	protein_coding	5.341	4.3254	3.6379	0.4875	0.4224	1.0553
chr8:133140667-133140748	LTR86A1	tagging	partial	KCNQ3	protein_coding	0.1051	0.1625	0.1355	0.1697	0.0499	0
chr8:133140793-133140832	LTR86A1	tagging	partial	KCNQ3	protein_coding	0.1051	0.1625	0.1355	0.1697	0.0499	0
chr12:82746198-82746414	LTR86A1	tagging	partial	CCDC59	protein_coding	1.1565	5.1738	3.7985	0.5447	13.5464	6.8434
chr2:87229670-87229896	LTR86A2	3' exon	partial	PLGLB1	protein_coding	0	0	0	0	0.0427	0.0716
chr4:22346649-22346743	LTR86A2	3' exon	partial	GPR125	protein_coding	0.7677	0.1597	0	0	0	0
chr5:96577098-96577516	LTR86B1	internal exon	partial	CTD-2215E18.1	protein_coding	3.7087	2.4357	5.0069	0.0944	0	0
chr2:172339744-172339938	LTR86B1	tagging	partial	DCAF17	protein_coding	1.322	1.8714	1.5194	0.9644	0.3845	1.3631
chr2:29355198-29355487	LTR86B2	tagging	partial	CLIP4	protein_coding	0	0.1766	0.0745	0.2157	0.2103	0
chr1:235642589-235643107	LTR86C	tagging	partial	B3GALNT2	protein_coding	1.4093	4.3858	2.3855	2.0584	2.3921	0.3453
chr5:145174828-145175163	LTR86C	tagging	partial	PRELID2	protein_coding	8.0404	7.3663	6.963	6.0615	0.2604	0.0097
chr18:44383512-44383635	LTR86C	tagging	partial	RP11-687F6.1	lincRNA	0	0	0	0	0.6929	0
chr18:44383665-44383845	LTR86C	tagging	partial	RP11-687F6.1	lincRNA	0	0	0	0	0.6929	0
chr8:22367954-22368446	LTR87	5' exon	partial	PPP3CC	protein_coding	0	0	0.1201	0.0589	0.9399	0.1103
chr3:45868117-45868681	LTR87	3' exon	partial	LZTFL1	protein_coding	0.5744	4.4458	2.07	0.3735	1.3584	8.1176
chr5:66565987-66566414	LTR87	3' exon	partial	CTD-2187J20.1	lincRNA	0	0.1555	0.2869	0	1.3989	0
chr7:155434949-155435050	LTR87	3' exon	partial	AC009403.2	protein_coding	0.0963	0.2734	0.0734	0.0135	0.0921	1.6481
chr15:72132273-72132859	LTR87	3' exon	partial	MYO9A	protein_coding	0	0.2196	0.9439	0.6172	0	0
chr1:32956965-32957517	LTR87	tagging	partial	ZBTB8A	protein_coding	0.0464	0.4292	0.2826	0.1597	0.0516	0.0222
chr2:200809506-200809588	LTR87	tagging	partial	TYW5	protein_coding	0.0096	0	0	0.026	0.3725	0.0312
chr2:200809650-200810048	LTR87	tagging	partial	TYW5	protein_coding	0.0096	0	0	0.026	0.3725	0.0312
chr7:155435350-155435480	LTR87	tagging	partial	AC009403.2	protein_coding	0.0963	0.2734	0.0734	0.0135	0.0921	1.6481
chr10:28525702-28525793	LTR87	tagging	partial	MPP7	protein_coding	0.4621	2.8249	1.7595	0.1829	0.0206	0.0422
chr17:5331808-5332348	LTR87	tagging	partial	RPAIN	protein_coding	0.1815	0.2162	0.1272	0.1565	0	0.1068
chr11:107374226-107374442	LTR87	tagging	partial	ALKBH8	protein_coding	0	0	0	0	2.0787	1.4704
chr19:6211035-6211120	LTR87	tagging	partial	CTC-503J8.6	lincRNA	7.4485	2.4106	1.6401	0.8845	0.7837	0.8294
chr16:58046556-58046838	LTR87	tagging	partial	USB1	protein_coding	0	0.1632	0	0	1.198	0.1039
chr16:74710695-74710933	LTR87	tagging	partial	MLKL	protein_coding	0.0022	0.0373	0.0678	0.0468	0.0023	0
chr16:74711553-74711565	LTR87	tagging	partial	MLKL	protein_coding	0.0022	0.0373	0.0678	0.0468	0.0023	0
chr16:74711875-74712190	LTR87	tagging	partial	MLKL	protein_coding	0.0022	0.0373	0.0678	0.0468	0.0023	0
chr18:32861471-32862060	LTR87	tagging	partial	ZSCAN30	protein_coding	0	0.002	0	0	0	0.1592
chr19:35345089-35345318	LTR87	tagging	partial	CTC-523E23.5	lincRNA	0	0.0038	0.0211	0	0.0161	0.0248
chr4:5815921-5816061	LTR89	3' exon	partial	EVC	protein_coding	0	0.186	0.0097	0.0028	0.0492	0.0064
chr11:117367251-117367804	LTR89	3' exon	partial	DSCAML1	protein_coding	0	0	0.9262	0	0	0
chr7:56148298-56148402	LTR89	3' exon	partial	SUMF2	protein_coding	0.0239	0.0232	0	0.1132	0.4515	0.5591
chr21:46596886-46597005	LTR89	3' exon	partial	ADARB1	protein_coding	0.0142	0.1096	0	0	0	0.0892
chr1:24200111-24200395	LTR89	tagging	partial	CNR2	protein_coding	0	0	0	0	0.0104	0.1767
chr1:54637232-54637345	LTR89	tagging	partial	AL357673.1	protein_coding	0	0	0	0.0251	0.0079	0.0027
chr1:54637498-54637637	LTR89	tagging	partial	AL357673.1	protein_coding	0	0	0	0.0251	0.0079	0.0027
chr3:42957775-42957852	LTR89	tagging	partial	FAM198A	protein_coding	0.0027	2.2518	1.5523	0.7399	0.2227	0.1631
chr3:42958155-42958379	LTR89	tagging	partial	FAM198A	protein_coding	0.0027	2.2518	1.5523	0.7399	0.2227	0.1631
chr9:6011588-6012053	LTR89	tagging	partial	RANBP6	protein_coding	0.0015	0.3379	0.3811	0.1355	0.1859	0.5202
chr11:6978176-6978407	LTR89	tagging	partial	ZNF215	protein_coding	5.8169	37.1862	28.9269	12.4508	2.8297	2.288
chr11:6978975-6979111	LTR89	tagging	partial	ZNF215	protein_coding	5.8169	37.1862	28.9269	12.4508	2.8297	2.288
chr17:62081894-62082179	LTR89	tagging	partial	ICAM2	protein_coding	0.1582	0	0	0	0	0
chr17:41602659-41602872	LTR89	tagging	partial	DHX8	protein_coding	0	1.5955	1.4756	1.4661	11.6905	2.4599
chr18:77675931-77675983	MER21A	5' exon	partial	PQLC1	protein_coding	0	0	0	0	0.9016	0
chr11:10844292-10844861	MER21A	3' exon	full	ZBED5	protein_coding	0	0	0	5.7002	5.2447	0
chr20:415834-416705	MER21A	3' exon	full	TBC1D20	protein_coding	0.2755	1.7143	0.9314	0.1092	1.3705	1.2396
chr19:53682760-53683244	MER21A	3' exon	full	ZNF665	protein_coding	0	0	0	0	0	0.4971
chr5:177653660-177653882	MER21A	3' exon	partial	PHYKPL	protein_coding	4.1506	3.092	0.1113	0	3.4222	0.8591
chr12:7016884-7017408	MER21A	3' exon	partial	LRRC23	protein_coding	0	0	0.3095	0.0569	1.7643	0
chr12:8077226-8078190	MER21A	3' exon	partial	SLC2A3	protein_coding	0	0	0	0	4.8382	0.1814
chr17:40813376-40813977	MER21A	3' exon	partial	TUBG2	protein_coding	0.0181	0.1984	0.6802	2.1536	0.1605	0
chr11:752379-753087	MER21A	internal exon	partial	TALDO1	protein_coding	0	0	0	0	0.3985	0
chr16:72573692-72574564	MER21A	internal exon	partial	AC004158.2	lincRNA	56.0866	21.9646	21.5473	0.1403	5.8801	1.8923
chr1:15729646-15730031	MER21A	tagging	partial	RP3-467K16.4	lincRNA	0.0497	0.0053	0	0	0	0.0029
chr1:15730335-15730718	MER21A	tagging	partial	RP3-467K16.4	lincRNA	0.0497	0.0053	0	0	0	0.0029
chr1:15730732-15730791	MER21A	tagging	partial	RP3-467K16.4	lincRNA	0.0497	0.0053	0	0	0	0.0029
chr1:116928149-116928344	MER21A	tagging	partial	ATP1A1	protein_coding	0	0.0839	0.238	0.2276	0.0427	0.147
chr1:116928343-116928466	MER21A	tagging	partial	ATP1A1	protein_coding	0	0.0839	0.238	0.2276	0.0427	0.147
chr1:234542868-234542954	MER21A	tagging	partial	TARBP1	protein_coding	0.5474	0.7832	0.4421	0.2486	0.1427	0.0522
chr3:120405697-120405871	MER21A	tagging	partial	RABL3	protein_coding	0.7855	0.4355	0.2061	0.0357	0.3196	0.8156
chr10:71897942-71898159	MER21A	tagging	partial	TYSND1	protein_coding	0.1954	1.0205	0.336	0.1832	0.9865	0.3771
chr8:29047530-29048435	MER21A	tagging	partial	KIF13B	protein_coding	0	0	0.0221	0.0326	0.0609	0
chr8:144098298-144098359	MER21A	tagging	partial	RP11-273G15.2	lincRNA	0	0	0	0	0	0.1486
chr21:29530600-29531297	MER21A	tagging	partial	AL035610.2	lincRNA	0.6731	1.9014	2.5171	1.2522	0.1178	0.0036
chr19:52960268-52960497	MER21A	tagging	partial	ZNF578	protein_coding	0.0052	0.0552	0.0321	0.0218	0.2464	0.0381
chr19:56667978-56668131	MER21A	tagging	partial	ZNF444	protein_coding	0.0111	0.388	0.2743	0.3459	0.141	0.005
chr17:40704034-40704578	MER21A	tagging	partial	HSD17B1	protein_coding	0	0	0	0	0.0024	0.1704
chr17:40813110-40813265	MER21A	tagging	partial	TUBG2	protein_coding	0.0181	0.1984	0.6802	2.1536	0.1605	0
chr19:52960502-52961046	MER21A	tagging	partial	ZNF578	protein_coding	0.0052	0.0552	0.0321	0.0218	0.2464	0.0381
chr19:52328653-52328890	MER21A	tagging	partial	FPR3	protein_coding	0	0	0	0	0.2798	0
chr19:56667092-56667904	MER21A	tagging	partial	ZNF444	protein_coding	0.0111	0.388	0.2743	0.3459	0.141	0.005
chr19:52328118-52328648	MER21A	tagging	partial	FPR3	protein_coding	0	0	0	0	0.2798	0
chr1:162332760-162333561	MER21B	5' exon	partial	NOS1AP	protein_coding	0	0.146	0.0652	0.0332	0.0027	0
chr7:40720659-40721041	MER21B	5' exon	partial	SUGCT	protein_coding	89.7779	35.8823	28.0538	20.9058	9.0815	0
chr19:53652730-53653616	MER21B	5' exon	partial	ZNF347	protein_coding	0	0	0	0	0.6541	0
chr19:53578560-53579354	MER21B	5' exon	partial	ZNF160	protein_coding	0	0.164	0.1281	0.5131	0.0255	0
chr1:229584480-229584835	MER21B	3' exon	partial	NUP133	protein_coding	32.671	25.372	32.1687	20.2052	7.3014	7.6264
chr5:870116-870504	MER21B	3' exon	partial	ZDHHC11	protein_coding	0	1.6473	2.1161	0	0.1614	0.2234
chr5:10461540-10462408	MER21B	3' exon	partial	ROPN1L	protein_coding	0.6331	1.0889	0.2374	0.3762	0	1.0069
chr6:43552207-43552595	MER21B	3' exon	partial	POLH	protein_coding	0	0.0837	0.9526	0	3.6278	1.313
chr6:43552898-43553327	MER21B	3' exon	partial	POLH	protein_coding	0	0.0837	0.9526	0	3.6278	1.313
chr17:26721539-26721688	MER21B	3' exon	partial	SLC46A1	protein_coding	0	0	0	0	0.1357	0.2947
chr18:21945768-21946462	MER21B	3' exon	partial	OSBPL1A	protein_coding	0	0.0469	0	0.2631	0	0
chr16:58657158-58657606	MER21B	3' exon	partial	CNOT1	protein_coding	0	0	0	0	1.7182	4.0405
chr19:58291965-58292413	MER21B	3' exon	partial	ZNF586	protein_coding	0.8367	7.9845	9.4084	4.1043	12.0898	8.188
chr19:52399083-52399406	MER21B	3' exon	partial	ZNF649	protein_coding	0	0.4604	0.2406	1.2288	1.5532	0.4683
chr3:60525724-60526388	MER21B	internal exon	partial	FHIT	protein_coding	0	0.1409	0.5374	0	0	0
chr5:64836949-64837374	MER21B	internal exon	partial	CENPK	protein_coding	0	0	0	0	0.8221	0.3487
chr8:86127505-86128291	MER21B	internal exon	partial	E2F5	protein_coding	1.0795	0.3307	0.5287	0.2106	0.6966	6.2467
chr14:94522527-94523273	MER21B	internal exon	partial	DDX24	protein_coding	0	0.4965	0.8333	0.7051	4.9746	1.1898
chr1:179893483-179893834	MER21B	tagging	partial	TOR1AIP1	protein_coding	1.6311	0.8799	0.5299	0.2868	2.2532	1.1307
chr2:73438452-73438623	MER21B	tagging	partial	NOTO	protein_coding	0	0	0	0	0	0.8941
chr2:73438922-73439053	MER21B	tagging	partial	NOTO	protein_coding	0	0	0	0	0	0.8941
chr6:160098862-160099277	MER21B	tagging	partial	SOD2	protein_coding	0.2984	0.1682	0.1532	0.098	0.1761	1.2943
chr6:160099578-160099889	MER21B	tagging	partial	SOD2	protein_coding	0.2984	0.1682	0.1532	0.098	0.1761	1.2943
chr18:21946482-21946521	MER21B	tagging	partial	OSBPL1A	protein_coding	0	0.0469	0	0.2631	0	0
chr8:124095134-124095532	MER21B	tagging	partial	TBC1D31	protein_coding	0	0.024	0.3678	0.0182	0.922	0
chr8:135807342-135807614	MER21B	tagging	partial	AC083843.1	lincRNA	0.0174	0	0	0	0.0323	0.0332
chr8:135808207-135808767	MER21B	tagging	partial	AC083843.1	lincRNA	0.0174	0	0	0	0.0323	0.0332
chrX:103345450-103346273	MER21B	tagging	partial	SLC25A53	protein_coding	0.009	0.026	0	0	0	0.0047
chr11:12275140-12275212	MER21B	tagging	partial	MICAL2	protein_coding	0	0.04	0	0.0383	0	0
chr11:74912372-74913146	MER21B	tagging	partial	SLCO2B1	protein_coding	0	0	0	0	0	0.0221
chr12:133336873-133337630	MER21B	tagging	partial	ANKLE2	protein_coding	0	0	0.0327	0.0808	0.1078	0.0511
chr13:114625705-114625998	MER21B	tagging	partial	LINC00452	lincRNA	0	0	0	0	0.3132	0.0288
chr20:33932496-33933319	MER21B	tagging	partial	UQCC1	protein_coding	0.6266	0.1167	0.0369	0.187	0.0889	0.3548
chr19:52957877-52958198	MER21B	tagging	partial	ZNF578	protein_coding	0.0052	0.0552	0.0321	0.0218	0.2464	0.0381
chr2:172433397-172433693	MER21C	5' exon	full	DYNC1I2	protein_coding	0.0577	1.0424	3.7361	0.2021	0.1182	0
chr5:70320361-70320991	MER21C	5' exon	full	NAIP	protein_coding	0.109	0.0176	0.1815	0.0095	0	0
chr6:30815564-30816200	MER21C	5' exon	full	XXbac-BPG27H4.8	lincRNA	0	0	0	0	0.0969	2.4201
chr12:8833944-8834748	MER21C	5' exon	full	RIMKLB	protein_coding	0	0	0	0	0.0743	1.7953
chr1:6912317-6913118	MER21C	5' exon	partial	CAMTA1	protein_coding	0.2878	0	0.7305	0	4.3056	0.3524
chr5:180733577-180733887	MER21C	5' exon	partial	AC138035.2	lincRNA	0	0.3491	0.0429	0.2843	0.2771	0
chr7:6836520-6836643	MER21C	5' exon	partial	CCZ1B	protein_coding	0	0.1052	0	0	0.181	0
chr16:75635828-75636539	MER21C	5' exon	partial	ADAT1	protein_coding	0	0	0	0	0.8515	0
chr19:55910837-55911127	MER21C	5' exon	partial	CTD-2105E13.13	lincRNA	0	0.2213	0	0.4169	0.6406	0
chr20:55045565-55046302	MER21C	3' exon	full	RTFDC1	protein_coding	0.0783	0	0	0	0.3941	1.6023
chr7:5967580-5967703	MER21C	3' exon	partial	RSPH10B	protein_coding	0.1126	3.3643	4.3936	2.8775	12.7953	13.8838
chr4:156643645-156644356	MER21C	3' exon	partial	GUCY1A3	protein_coding	0	0.0165	1.2918	0.1703	0.035	0
chr7:147027038-147027738	MER21C	3' exon	partial	CNTNAP2	protein_coding	1.7115	1.058	1.5614	0.0499	0.073	0
chr16:58044224-58045146	MER21C	3' exon	partial	USB1	protein_coding	0	0.0127	0	0.0276	0.0404	0.3311
chr17:680939-681662	MER21C	3' exon	partial	GLOD4	protein_coding	0.0154	0.2182	0.1024	0.4199	0.0052	0.2905
chr15:94987295-94987999	MER21C	3' exon	partial	MCTP2	protein_coding	4.862	6.9188	3.899	0.4041	1.0558	0
chr17:78076112-78076806	MER21C	3' exon	partial	GAA	protein_coding	0	0.0095	0	0.0672	0.1461	0.0852
chr19:21274493-21274841	MER21C	3' exon	partial	ZNF714	protein_coding	0	0.0207	0	0	0	0
chr7:144364775-144365581	MER21C	internal exon	partial	TPK1	protein_coding	0.6191	0	1.3395	1.1037	0	0.2363
chr11:130583086-130583219	MER21C	internal exon	partial	C11orf44	protein_coding	1.6549	3.2023	0.4241	0	0	0
chr1:677316-677386	MER21C	tagging	partial	RP11-206L10.3	lincRNA	0	0.0343	0	0.0217	0.0499	0
chr1:677689-677990	MER21C	tagging	partial	RP11-206L10.3	lincRNA	0	0.0343	0	0.0217	0.0499	0
chr1:228583690-228584507	MER21C	tagging	partial	TRIM11	protein_coding	0	0.429	0.1993	0.0604	0	0
chr1:244538512-244538603	MER21C	tagging	partial	ADSS	protein_coding	0	0	0	0	0.158	0
chr4:125070-125382	MER21C	tagging	partial	ZNF718	lincRNA	0.0086	0.0332	0	0.012	1.9289	0.5589
chr6:116838761-116839582	MER21C	tagging	partial	FAM26E	protein_coding	0	0	0	0	0.0063	0.0358
chr8:144379278-144379537	MER21C	tagging	partial	ZNF696	protein_coding	0	0.0114	0	0.0534	0.005	0.1539
chr8:144379826-144380089	MER21C	tagging	partial	ZNF696	protein_coding	0	0.0114	0	0.0534	0.005	0.1539
chr9:115761605-115762425	MER21C	tagging	partial	ZNF883	lincRNA	1.5703	1.8823	0.7072	1.3302	0.3462	0
chrX:47720137-47720254	MER21C	tagging	partial	ZNF81	protein_coding	0.0836	0	0.7557	0	0	0.0219
chrX:47720257-47720378	MER21C	tagging	partial	ZNF81	protein_coding	0.0836	0	0.7557	0	0	0.0219
chr10:134757635-134758066	MER21C	tagging	partial	LINC01166	lincRNA	0	0	0.0129	0	0	0.0284
chr11:12275054-12275146	MER21C	tagging	partial	MICAL2	protein_coding	0	0.04	0	0.0383	0	0
chr11:12275208-12275756	MER21C	tagging	partial	MICAL2	protein_coding	0	0.04	0	0.0383	0	0
chr13:95284908-95285559	MER21C	tagging	partial	GPR180	protein_coding	0.3792	0.0898	0.0773	0	0.0777	0.0974
chr19:52517430-52517580	MER21C	tagging	partial	ZNF614	protein_coding	0.1046	0.1328	0.0466	0.0319	2.3581	2.4183
chr17:26722295-26722775	MER21C	tagging	partial	SLC46A1	protein_coding	0	0	0	0	0.1357	0.2947
chr17:44633478-44634096	MER21C	tagging	partial	ARL17A	protein_coding	0.0759	0.2939	0.3163	0.0199	0.8237	0.1614
chr17:44634431-44634590	MER21C	tagging	partial	ARL17A	protein_coding	0.0759	0.2939	0.3163	0.0199	0.8237	0.1614
chr19:52517615-52518262	MER21C	tagging	partial	ZNF614	protein_coding	0.1046	0.1328	0.0466	0.0319	2.3581	2.4183
chr19:7807040-7807058	MER21C	tagging	partial	CD209	protein_coding	0	0	0	0.1322	0.0029	0
chr19:7807373-7807474	MER21C	tagging	partial	CD209	protein_coding	0	0	0	0.1322	0.0029	0
chr19:52957467-52957879	MER21C	tagging	partial	ZNF578	protein_coding	0.0052	0.0552	0.0321	0.0218	0.2464	0.0381
chr14:101426644-101426946	MER54A	5' exon	partial	AL132709.8	lincRNA	0	0	0	0.0713	0	0
chr19:50485100-50485469	MER54A	3' exon	partial	VRK3	protein_coding	0.0382	2.1513	1.3572	2.2466	0.982	0.5879
chr10:25769736-25770500	MER54A	internal exon	partial	GPR158	protein_coding	0.1841	4.3929	5.0815	5.8653	1.6964	0
chr15:24753977-24754500	MER54A	internal exon	partial	PWRN1	lincRNA	0	0	0.1935	0.3203	0.1388	0
chr16:86099358-86099739	MER54A	internal exon	partial	LINC01082	lincRNA	0	0.2674	1.1769	0.01	1.0611	0
chr19:12247767-12247838	MER54A	tagging	partial	ZNF625	protein_coding	0	0	0	0.8402	0.3843	0
chr15:31063382-31064267	MER54A	tagging	partial	ARHGAP11B	protein_coding	0	0	0	0	0.2222	0.206
chr3:111215705-111215866	MER54B	5' exon	partial	RP11-615J4.3	lincRNA	0	0.5069	0.4052	0	0.19	0.1031
chr8:83774799-83775584	MER54B	3' exon	full	RP11-731N10.1	lincRNA	0	0.4234	0	0	0	0
chr9:117665117-117665897	MER54B	3' exon	partial	TNFSF8	protein_coding	0.0781	0	0.1487	0.1191	0	0
chr17:5833081-5833404	MER54B	3' exon	partial	WSCD1	protein_coding	0.0297	0	0.0212	0	0	0
chr22:24899414-24900193	MER54B	3' exon	partial	UPB1	protein_coding	0	3.1521	0.8139	0.1565	0.4925	0
chr9:139615489-139616002	MER54B	tagging	partial	FAM69B	protein_coding	0	0	0.017	0	0.7823	0.05
chr11:10503058-10503592	MER68	5' exon	partial	AMPD3	protein_coding	0	0.1025	0.1512	0	0	0
chr19:12129430-12129536	MER68	5' exon	partial	ZNF433	protein_coding	0.0133	0.6006	0.2533	1.5464	0.8672	0.0698
chr5:868662-868943	MER68	3' exon	full	ZDHHC11	protein_coding	0	0	0	0	0.1057	0.6499
chr5:124372976-124373508	MER68	3' exon	full	RP11-257I8.2	lincRNA	0	0.292	2.0114	0	0	0
chr16:76684518-76685051	MER68	3' exon	full	CNTNAP4	protein_coding	1.843	3.9564	1.4255	0.0202	0.3342	0.2569
chr1:2088017-2088314	MER68	3' exon	partial	PRKCZ	protein_coding	0	0.0718	0.3003	0.2014	0.0982	0
chr1:143351483-143351644	MER68	3' exon	partial	RP11-435B5.3	lincRNA	0.1548	0	0	0	0.1585	0
chr2:11268289-11268782	MER68	3' exon	partial	AC062028.1	lincRNA	0	2.4237	0.1677	0.0137	0.0067	0.0822
chr12:110606906-110607254	MER68	3' exon	partial	IFT81	protein_coding	0.0052	0.0737	0.2471	0.189	0	0.0054
chr8:48206964-48207127	MER68	3' exon	partial	SPIDR	protein_coding	0	0.5159	0	0.2122	0.5129	0.2671
chr18:43123668-43124205	MER68	3' exon	partial	SLC14A2	protein_coding	0	0.1039	1.0422	0	0	0
chr4:39274809-39275332	MER68	internal exon	partial	WDR19	protein_coding	0.179	0.6437	0.4095	0.7013	0.5028	0.0181
chr1:244863387-244863561	MER68	tagging	partial	DESI2	protein_coding	0.9629	2.3564	3.4629	0.9169	0.5896	0.2103
chr3:57548330-57548393	MER68	tagging	partial	PDE12	protein_coding	0.0094	0.1267	0.1255	0.002	1.52	1.2809
chr3:174359141-174359280	MER68	tagging	partial	NAALADL2	protein_coding	0.6811	5.1569	2.6356	1.5553	0.5711	0
chr5:203963-204434	MER68	tagging	partial	CCDC127	protein_coding	0.0045	1.6493	1.1521	0.698	0.4712	0.8668
chr5:59282429-59282985	MER68	tagging	partial	PDE4D	protein_coding	0.4286	0.178	0.2878	0.6003	0.0541	0
chr9:88168925-88169094	MER68	tagging	partial	AGTPBP1	protein_coding	0	0	0.0648	0	0.0291	0
chr10:5007755-5007869	MER68	tagging	partial	AKR1C1	protein_coding	0	0	0	0	0.1691	0
chr11:120201815-120202370	MER68	tagging	partial	TMEM136	protein_coding	0.1306	0.1851	0.4219	0.3645	0.0603	0.5444
chr12:110606603-110606789	MER68	tagging	partial	IFT81	protein_coding	0.0052	0.0737	0.2471	0.189	0	0.0054
chr19:12296236-12296281	MER68	tagging	partial	ZNF136	protein_coding	0	0.0339	0.1002	0.0811	0.009	0
chr19:12505223-12505381	MER68	tagging	partial	ZNF443	protein_coding	0	0.1927	0.064	0.204	0.014	0
chr13:79950909-79951431	MER68	tagging	partial	RBM26	protein_coding	0	0.0068	0.01	0.1432	0	0
chr15:42860305-42860408	MER68	tagging	partial	HAUS2	protein_coding	0.1568	0.0752	0.3043	0.4829	4.3104	4.9121
chr15:42860763-42861189	MER68	tagging	partial	HAUS2	protein_coding	0.1568	0.0752	0.3043	0.4829	4.3104	4.9121
chr19:12504567-12504822	MER68	tagging	partial	ZNF443	protein_coding	0	0.1927	0.064	0.204	0.014	0
chr19:12295435-12295722	MER68	tagging	partial	ZNF136	protein_coding	0	0.0339	0.1002	0.0811	0.009	0
chr19:19787939-19788331	MER68	tagging	partial	ZNF101	protein_coding	0	0.0095	0.0316	0.0052	1.0855	0.3214
chr19:50504311-50504640	MER68	tagging	partial	VRK3	protein_coding	0	0.0375	0.0891	0.0475	0.1124	0.0745
chr19:57773083-57773584	MER68	tagging	partial	CTC-444N24.8	lincRNA	1.8883	1.9411	0.4494	0	0.1225	1.5484
chr1:212607611-212608089	MER68B	3' exon	partial	NENF	protein_coding	0	0	0.5124	0	0.0283	0
chr14:71062769-71063237	MER68B	3' exon	partial	MED6	protein_coding	0.4577	0.2147	1.0167	0.4857	12.0826	3.3341
chr1:231374449-231374527	MER68B	tagging	partial	C1orf131	protein_coding	0.2568	2.0123	1.8958	1.3928	0.5893	0.7111
chr2:96853161-96853413	MER68B	tagging	partial	STARD7	protein_coding	0.0227	1.3847	2.022	5.4895	0.8489	0.0159
chr4:879976-880113	MER68B	tagging	partial	GAK	protein_coding	0	0.1047	0.0061	0	0.0467	0
chr16:84108409-84108950	MER68B	tagging	partial	MBTPS1	protein_coding	0	0.5563	0.1162	0.1254	0.5583	0
chr21:45156981-45157088	MER68B	tagging	partial	PDXK	protein_coding	0	0	0	0	0.0865	0.0225
chr4:139233469-139233942	MER70A	5' exon	partial	LINC00498	lincRNA	0	0.2648	0	0	0	0
chr12:21472279-21472634	MER70B	internal exon	partial	SLCO1A2	protein_coding	0	0	0	2.4306	0	0
chr4:130033179-130033285	MER70B	tagging	partial	C4orf33	protein_coding	0.6556	0.2358	0.0824	0.0154	0.1454	0.0144
chr5:1725480-1725621	MER70B	tagging	partial	CTD-2587M23.1	lincRNA	0	0.1249	0.0086	0.0284	0.0815	0
chr8:87557267-87557663	MER70C	3' exon	partial	CPNE3	protein_coding	0	0	0.0218	0.2329	0.5127	0.3009
chr19:44978900-44978991	MER70C	tagging	partial	AC069278.4	lincRNA	0	0	0	0	0.0092	0.1884
chr2:214615900-214616698	MER73	5' exon	full	SPAG16	protein_coding	5.243	2.7194	1.2349	3.104	0.1107	0.1702
chr5:94125775-94126371	MER73	5' exon	full	MCTP1	protein_coding	1.6489	0.5549	3.1051	1.3807	0.3059	0
chr5:108655206-108655741	MER73	5' exon	full	CTD-2587M2.1	lincRNA	0.4578	0.5906	0.1634	0.4008	0.3712	0
chr7:76800500-76801096	MER73	5' exon	full	CCDC146	protein_coding	0.4233	4.6659	5.0547	2.2635	2.2853	0
chr7:81809858-81810559	MER73	5' exon	full	CACNA2D1	protein_coding	47.6105	72.8085	82.6616	32.9674	18.1454	0.1655
chr11:28782209-28782998	MER73	5' exon	full	RP11-115J23.1	lincRNA	3.5175	3.1861	1.2112	1.8344	0.5109	0
chr12:84178013-84178624	MER73	5' exon	full	RP11-384P14.1	lincRNA	5.338	6.53	5.4319	0	0.911	0
chr15:54875840-54876417	MER73	5' exon	full	UNC13C	protein_coding	20.6018	15.7413	34.0371	24.8414	10.3836	0
chr2:37965404-37965627	MER74A	5' exon	full	CDC42EP3	protein_coding	0.4975	2.4786	3.7234	0.5887	1.6454	0.054
chr12:102461482-102461592	MER74A	5' exon	full	CCDC53	protein_coding	0.2462	1.2702	0.5468	1.0344	0.3641	0
chr2:37965773-37966115	MER74A	5' exon	partial	CDC42EP3	protein_coding	0.4975	2.4786	3.7234	0.5887	1.6454	0.054
chr11:134256687-134257244	MER74A	5' exon	partial	B3GAT1	protein_coding	0	0.1224	0.1437	0.0393	0.0145	0
chr2:99832198-99832660	MER74A	3' exon	full	C2orf15	protein_coding	0	0.3324	1.8924	0	0.4398	0.3478
chr7:2638309-2638409	MER74A	3' exon	partial	IQCE	protein_coding	0	0.0323	0	0	0.1367	0.1577
chr19:17214052-17214585	MER74A	3' exon	partial	MYO9B	protein_coding	0.0511	0.3956	0.4744	0.6622	1.0598	0.0671
chr8:27144211-27144731	MER74A	tagging	partial	TRIM35	protein_coding	1.658	1.7539	0.9982	0.3193	0.8163	1.019
chr9:139255091-139255180	MER74A	tagging	partial	CARD9	protein_coding	0.0782	0.3188	0.1152	0.0177	0.1248	0.2011
chr11:73440649-73441189	MER74A	tagging	partial	RAB6A	protein_coding	0	0.0065	0.0429	0.0947	5.7604	0.5519
chr14:105773545-105773920	MER74A	tagging	partial	BRF1	protein_coding	0	0	0	0.0003	0.0084	0.0005
chr15:89047725-89048223	MER74A	tagging	partial	MRPL46	protein_coding	0.0532	0.0549	0	0	0	0.0948
chr16:75627694-75628218	MER74A	tagging	partial	ADAT1	protein_coding	0.1753	1.2487	0.8814	0.3684	0.3831	0
chr22:30920663-30920681	MER74A	tagging	partial	SEC14L6	protein_coding	0	0	0.0419	0.1234	0	0
chr22:30919831-30920363	MER74A	tagging	partial	SEC14L6	protein_coding	0.3625	0.3193	0.303	0.1981	0	0.0619
chr12:120094891-120094986	MER74B	5' exon	partial	RP11-768F21.1	lincRNA	10.2755	3.6993	3.3213	0.2343	0.1305	0
chr9:135602938-135603429	MER74B	5' exon	partial	AK8	protein_coding	0.0939	0.5453	0	0.4934	0	0.3944
chr12:120094590-120094894	MER74B	5' exon	partial	RP11-768F21.1	lincRNA	10.2755	3.6993	3.3213	0.2343	0.1305	0
chr19:57882623-57883013	MER74B	5' exon	partial	ZNF547	protein_coding	0	0	0.0463	0	1.0461	0
chr19:57907960-57908311	MER74B	5' exon	partial	ZNF547	protein_coding	0	0	0.4082	0	0.2841	0
chr3:48411230-48411819	MER74B	internal exon	partial	SPINK8	protein_coding	24.2217	16.1201	11.4444	0.9954	0.4649	0
chr4:53616840-53616991	MER74B	internal exon	partial	ERVMER34-1	protein_coding	0	0	0	0	1.3948	0.0596
chr1:1345143-1345186	MER74B	tagging	partial	RP4-758J18.13	lincRNA	0	0	0	0	0.2366	0.2582
chr1:228366520-228366776	MER74B	tagging	partial	IBA57	protein_coding	0.001	0.0148	0	0	0.0049	0.1673
chr2:100890909-100891377	MER74B	tagging	partial	LONRF2	protein_coding	0.1812	0.1482	0.1979	0.0366	0.0023	0.0045
chr2:100895994-100896465	MER74B	tagging	partial	LONRF2	protein_coding	0.1812	0.1482	0.1979	0.0366	0.0023	0.0045
chr7:127938761-127938780	MER74B	tagging	partial	RBM28	protein_coding	0.0113	0.0458	0.047	0.0619	0.9022	0.3081
chr7:127939082-127939564	MER74B	tagging	partial	RBM28	protein_coding	0.0113	0.0458	0.047	0.0619	0.9022	0.3081
chrX:216859-217000	MER74B	tagging	partial	PLCXD1	protein_coding	0.0512	0.266	0.1096	0.0582	0.2461	0.1242
chrX:218593-218879	MER74B	tagging	partial	PLCXD1	protein_coding	0.0512	0.266	0.1096	0.0582	0.2461	0.1242
chr14:105773260-105773364	MER74B	tagging	partial	BRF1	protein_coding	0	0	0	0.0003	0.0084	0.0005
chr21:46565108-46565597	MER74B	tagging	partial	ADARB1	protein_coding	0.006	0	0.0057	0.3076	0.384	0.2021
chr13:101878969-101879526	MER76	5' exon	partial	NALCN	protein_coding	6.7754	3.1701	1.036	0.7867	0.8388	0
chr20:248986-249554	MER76	5' exon	partial	RP5-1103G7.10	lincRNA	0.0937	0	0.19	0	0	0
chr21:44187107-44187493	MER76	5' exon	partial	PDE9A	protein_coding	0.3143	1.5769	5.2531	2.6416	1.4902	0
chr5:102542322-102542961	MER76	tagging	partial	PPIP5K2	protein_coding	0.5737	0.1036	0.2541	0.0237	0.0262	0.857
chr17:80005779-80006205	MER76	tagging	partial	RFNG	protein_coding	0.0142	1.3669	1.3479	1.2213	1.1793	0.2105
chr2:53303453-53304030	MER77	3' exon	full	AC010967.2	lincRNA	0	0.7897	1.2869	0	2.1941	0
chr3:44400740-44401366	MER77	3' exon	partial	TCAIM	protein_coding	4.4058	4.5259	3.2702	1.1819	0.1656	1.6226
chr3:101477961-101478593	MER77	3' exon	partial	CEP97	protein_coding	0	0.1262	0.4658	0.3579	0.6136	0.1636
chr16:75628210-75628426	MER77	3' exon	partial	ADAT1	protein_coding	0.1753	1.2487	0.8814	0.3684	0.3831	0
chr17:29326460-29326997	MER77	3' exon	partial	RNF135	protein_coding	12.8352	12.6226	6.556	2.6064	0.2589	5.751
chr19:50062326-50062548	MER77	3' exon	partial	NOSIP	protein_coding	0	0.0424	0	0.0345	7.1086	1.9575
chr4:20717746-20717959	MER77	internal exon	partial	PACRGL	protein_coding	0	1.918	1.0958	0.2687	0.0491	0
chr1:231374167-231374443	MER77	tagging	partial	C1orf131	protein_coding	0.2568	2.0123	1.8958	1.3928	0.5893	0.7111
chr3:176560223-176560764	MER77	tagging	partial	RP11-644C3.1	lincRNA	1.5424	6.3726	9.901	3.5872	0.3797	0.0137
chr5:14465872-14466316	MER77	tagging	partial	TRIO	protein_coding	0.0075	0.0872	0.2788	0.2156	0.2563	0
chr8:133074993-133075585	MER77	tagging	partial	HHLA1	protein_coding	0.0293	1.676	0.3733	0.198	0.0719	0
chrX:27193211-27193593	MER77	tagging	partial	RP11-268G12.3	lincRNA	0	0	0	0	0.0714	0
chrX:27193755-27193835	MER77	tagging	partial	RP11-268G12.3	lincRNA	0	0	0	0	0.0714	0
chr19:51382414-51382589	MER77	tagging	partial	KLK2	protein_coding	0	0	0	0	0.2834	0.7483
chr19:56666497-56666966	MER77	tagging	partial	ZNF444	protein_coding	0.0111	0.388	0.2743	0.3459	0.141	0.005
chr16:75627428-75627530	MER77	tagging	partial	ADAT1	protein_coding	0.1753	1.2487	0.8814	0.3684	0.3831	0
chr19:45165791-45166003	MER77	tagging	partial	PVR	protein_coding	0.133	1.5294	0.5555	0.8484	0.5988	1.322
chr19:45165234-45165526	MER77	tagging	partial	PVR	protein_coding	0.133	1.5294	0.5555	0.8484	0.5988	1.322
chr22:26921479-26921609	MER77	tagging	partial	TPST2	protein_coding	0.079	0	0.0668	0.3626	4.1461	4.993
chr19:51382739-51383181	MER77	tagging	partial	KLK2	protein_coding	0	0.0365	0	0.0022	0.1074	0.2808
chr4:112730437-112731045	MER77B	5' exon	full	RP11-269F21.2	lincRNA	0	0	1.0457	0	0	0
chr13:28224012-28224507	MER77B	3' exon	partial	POLR1D	protein_coding	0.8054	2.6831	1.417	0.9068	1.6809	0.2675
chr4:44701611-44701692	MER77B	tagging	partial	GUF1	protein_coding	0.0096	1.7934	1.633	0.5515	2.1418	15.9707
chr13:28224538-28224757	MER77B	tagging	partial	POLR1D	protein_coding	0.8054	2.6831	1.417	0.9068	1.6809	0.2675
chr22:45245705-45245986	MER77B	tagging	partial	PRR5	protein_coding	0.2815	0.6313	1.0848	1.4952	0.2105	0.3061
chr19:52476662-52476808	MER77B	tagging	partial	ZNF350	protein_coding	0.0174	0.0618	0.1409	0	5.9506	0.4294
chr3:57886599-57887037	MER88	tagging	partial	SLMAP	protein_coding	0	0	0.0344	0	0.1111	0.0108
chr22:22848205-22848541	MLT1A	5' exon	full	ZNF280B	protein_coding	0	0.2196	3.0255	3.3784	0.4649	0
chr4:140585461-140585803	MLT1A	5' exon	full	MGST2	protein_coding	13.1165	4.6858	8.5003	6.2181	6.8535	0.2118
chr12:92387112-92387516	MLT1A	5' exon	partial	BTG1	protein_coding	0	0	0	0	0.1598	0.4021
chr8:1248106-1248433	MLT1A	5' exon	partial	CTD-2281E23.1	lincRNA	0	0.0697	0	0	0	0
chr12:123650051-123650423	MLT1A	5' exon	partial	MPHOSPH9	protein_coding	0.0447	0.1152	0.7652	0.9852	3.6356	0.75
chr5:145640697-145641007	MLT1A	5' exon	partial	RBM27	protein_coding	0.1928	1.9271	5.8716	9.6741	4.2272	0.9947
chr12:22852730-22852990	MLT1A	5' exon	partial	RP11-114G22.1	lincRNA	1.5006	3.0899	0.1374	0.3031	0.0099	0
chr7:30625451-30625800	MLT1A	5' exon	partial	GGCT	protein_coding	0.1695	0	0.0605	0	0	0.6559
chr2:3218194-3218261	MLT1A	5' exon	partial	TSSC1	protein_coding	1.2994	2.3699	2.5379	5.3814	1.3612	1.1052
chr8:61548802-61549129	MLT1A	5' exon	partial	RP11-91I20.3	lincRNA	0	0	0	0	0.1919	0.0022
chr11:2318962-2319355	MLT1A	3' exon	full	C11orf21	protein_coding	0	0	0	0	0.6879	0
chr3:176361658-176362065	MLT1A	3' exon	full	RP11-644C3.1	lincRNA	5.0986	5.8572	0.6377	0.9122	0.1397	0
chr15:102500029-102500208	MLT1A	3' exon	full	MIR1302-11	lincRNA	0	0	0	2.6498	0.0344	0.2118
chr8:123058792-123059150	MLT1A	3' exon	partial	RP11-398G24.2	lincRNA	5.5722	2.9756	2.0917	0.2806	0	0
chr6:14280311-14280686	MLT1A	3' exon	partial	LINC01108	lincRNA	0.0067	0	0.0635	0	0.1663	0.5136
chr10:1142259-1142619	MLT1A	3' exon	partial	WDR37	protein_coding	0	0.0961	0.3263	0.4279	1.0377	0
chr8:9050956-9051353	MLT1A	3' exon	partial	RP11-10A14.5	lincRNA	0.0564	0.4611	1.0746	0.0132	23.3238	19.5897
chr9:91198558-91198934	MLT1A	3' exon	partial	NXNL2	protein_coding	0	0	0	0	0.5222	0
chr14:60577563-60577921	MLT1A	3' exon	partial	PCNXL4	protein_coding	0.0858	0.5903	0.0617	0.2724	0.2232	0.1661
chr2:20988914-20989257	MLT1A	3' exon	partial	C2orf43	protein_coding	0	0.1749	0	0	0	0.0633
chr2:166891155-166891550	MLT1A	3' exon	partial	SCN1A	protein_coding	0.6916	0.5438	0.3449	0	0.0292	0
chr18:72184174-72184431	MLT1A	internal exon	partial	CNDP2	protein_coding	0	0.1102	0	0.1579	0.0024	0.005
chr1:6078688-6078937	MLT1A	internal exon	partial	KCNAB2	protein_coding	0	0.1748	0	0	0.4164	0.2845
chr2:22022028-22022427	MLT1A	internal exon	partial	AC067959.1	lincRNA	1.6189	0	1.2754	2.1893	0.7812	0
chr6:119241480-119241624	MLT1A	internal exon	partial	MCM9	protein_coding	0.0075	0.0019	0.0559	0	0.2116	0.0142
chr18:72184976-72185073	MLT1A	internal exon	partial	CNDP2	protein_coding	0	0.1102	0	0.1579	0.0024	0.005
chr3:6230470-6230853	MLT1A	internal exon	partial	AC026167.1	lincRNA	2.4626	3.4746	6.117	7.6259	0.0131	0
chr12:71509446-71509803	MLT1A	internal exon	partial	CTD-2021H9.3	protein_coding	0	0	0	0	21.2633	4.4597
chr6:119242047-119242066	MLT1A	internal exon	partial	MCM9	protein_coding	0.0075	0.0019	0.0559	0	0.2116	0.0142
chr13:39151767-39151907	MLT1A	internal exon	partial	LINC00366	lincRNA	0	0	0	0	0.6141	0
chr21:47472227-47472366	MLT1A	internal exon	partial	AP001476.4	lincRNA	0.2245	1.3517	1.0152	0.5765	0.4471	0
chr7:9776758-9776865	MLT1A	internal exon	partial	AC060834.3	lincRNA	2.1221	1.146	1.8557	0	0	0
chr1:57230417-57230745	MLT1A	internal exon	partial	C1orf168	protein_coding	0	0.9011	1.0805	2.3848	0.8047	0
chr15:52208037-52208402	MLT1A	internal exon	partial	TMOD3	protein_coding	0	0	0	0	3.7898	0.5407
chr4:128115458-128115858	MLT1A	internal exon	partial	RP11-125O18.1	lincRNA	7.8765	11.2306	14.5451	7.1336	3.0928	0
chr5:15412124-15412502	MLT1A	tagging	partial	RP1-137K24.1	lincRNA	1.8858	0.524	0.4212	0	0.6016	0
chr17:33678039-33678429	MLT1A	tagging	partial	SLFN11	protein_coding	0	0	0	0	0.0361	0
chr1:43002364-43002741	MLT1A	tagging	partial	CCDC30	protein_coding	0.0045	0	0	0.0884	0	0
chr17:74765284-74765645	MLT1A	tagging	partial	MFSD11	protein_coding	0	0.0774	0.0571	0	0.5428	0.7663
chr14:48236512-48236874	MLT1A	tagging	partial	LINC00648	lincRNA	0	0	0	0	0.0249	0.0255
chr2:48169206-48169595	MLT1A	tagging	partial	AC079807.4	lincRNA	0.0667	0.2269	0	0	0.0041	0
chr13:22070450-22070645	MLT1A	tagging	partial	MICU2	protein_coding	4.5894	3.2161	0.6149	1.0237	0.9515	3.9847
chr18:72251054-72251366	MLT1A	tagging	partial	CNDP1	protein_coding	1.0749	0.7811	0.0045	0	0.2323	0.4237
chr19:56951326-56951496	MLT1A	tagging	partial	ZNF667	protein_coding	0.1036	0.1286	0.1195	0.0893	0.0531	0.3117
chr11:88029842-88030002	MLT1A	tagging	partial	CTSC	protein_coding	0.1353	0.2837	0.3346	0.7833	1.1171	0.588
chr5:65122040-65122231	MLT1A	tagging	partial	NLN	protein_coding	0.1571	0.6296	0.4516	0.1731	0.0493	0.7827
chr5:65121793-65121922	MLT1A	tagging	partial	NLN	protein_coding	0.1571	0.6296	0.4516	0.1731	0.0493	0.7827
chr6:31167958-31168280	MLT1A	tagging	partial	HCG27	protein_coding	0	0	0	0	0.2807	0
chr2:219231347-219231679	MLT1A	tagging	partial	C2orf62	protein_coding	0	0	0	0	0.1087	0.0391
chr15:99676571-99676916	MLT1A	tagging	partial	TTC23	protein_coding	0	0.0867	0.0301	0.0083	0.0634	0.0623
chr14:60575677-60576047	MLT1A	tagging	partial	PCNXL4	protein_coding	0.0858	0.5903	0.0617	0.2724	0.2232	0.1661
chr19:58064244-58064598	MLT1A	tagging	partial	ZNF549	protein_coding	0.0026	0.0085	0.0251	0.0037	0.3497	0.0208
chr12:67959909-67960258	MLT1A	tagging	partial	RP11-542B15.1	lincRNA	0.0042	0.5665	0.1769	1.3898	0.0461	0
chr18:77730405-77730768	MLT1A	tagging	partial	HSBP1L1	protein_coding	0	0	0	0	0.117	0.3782
chr19:58065704-58065930	MLT1A	tagging	partial	ZNF549	protein_coding	0.0026	0.0085	0.0251	0.0037	0.3497	0.0208
chr15:24926555-24926912	MLT1A	tagging	partial	NPAP1	protein_coding	0	0.024	0	0	0	0
chr19:56589672-56589846	MLT1A	tagging	partial	CTD-2621I17.6	lincRNA	0.0395	0	0	0	0.0606	0
chr1:228292545-228292625	MLT1A	tagging	partial	C1orf35	protein_coding	0	0.2083	0.1765	0.3727	0.1102	0.4456
chr6:35550073-35550456	MLT1A	tagging	partial	FKBP5	protein_coding	0	0.0054	0	0	0.0099	0.0479
chr21:47472391-47472547	MLT1A	tagging	partial	AP001476.4	lincRNA	0	1.0576	2.3412	1.4574	1.1839	0
chr22:48250680-48251014	MLT1A	tagging	partial	RP11-191L9.4	lincRNA	0	0	2.3792	3.9819	0.2133	0
chr12:65274097-65274433	MLT1A	tagging	partial	TBC1D30	protein_coding	0.1908	0.2709	0.3375	0.1542	0.0802	0.0213
chr2:112525954-112526324	MLT1A	tagging	partial	ANAPC1	protein_coding	35.1433	24.2692	19.5195	14.8809	3.1996	6.8574
chr9:97078153-97078538	MLT1A	tagging	partial	NUTM2F	protein_coding	0	0	0	0	0.352	0.0784
chr7:101209752-101210119	MLT1A	tagging	partial	LINC01007	lincRNA	0	0	0	0.0529	0.0043	0
chr5:362100-362479	MLT1A	tagging	partial	AHRR	protein_coding	0.0372	0.5971	1.0838	0.4661	0.0553	0
chr19:56950841-56951036	MLT1A	tagging	partial	ZNF667	protein_coding	0.1036	0.1286	0.1195	0.0893	0.0531	0.3117
chr1:228291884-228292056	MLT1A	tagging	partial	C1orf35	protein_coding	0	0.2083	0.1765	0.3727	0.1102	0.4456
chr4:5166213-5166400	MLT1A	tagging	partial	STK32B	protein_coding	0.0648	0.5348	1.2169	0.5111	0.2373	0
chr20:37044639-37044960	MLT1A	tagging	partial	RP4-564F22.5	lincRNA	0	0	0	0	0.0275	0
chr6:10628810-10628964	MLT1A	tagging	partial	GCNT2	protein_coding	0	0	0	0	0.0142	0.0048
chr20:37044245-37044291	MLT1A	tagging	partial	RP4-564F22.5	lincRNA	0	0	0	0	0.0275	0
chr3:48413217-48413549	MLT1A0	5' exon	full	SPINK8	protein_coding	0.3178	0.0586	0.9941	0.5405	0	0
chr8:27834475-27834814	MLT1A0	5' exon	full	SCARA5	protein_coding	0.2085	2.5999	7.5418	2.6281	3.0838	0.1459
chr5:6795643-6795978	MLT1A0	5' exon	full	RP11-332J15.1	lincRNA	0	1.5588	0.2091	0.0769	0	0
chr5:4866631-4866759	MLT1A0	5' exon	full	CTD-2046I8.1	lincRNA	0	0	0.3871	0	0.347	0
chr14:46410066-46410438	MLT1A0	5' exon	full	LINC00871	lincRNA	13.7106	12.4851	18.938	20.1451	3.5176	0
chr2:68113185-68113550	MLT1A0	5' exon	full	AC010987.5	lincRNA	0	1.8773	0.665	9.1722	0.6755	0
chr14:46679948-46680296	MLT1A0	5' exon	full	LINC00871	lincRNA	6.27	1.1157	6.2774	1.3249	0.2767	0
chr16:86755660-86755818	MLT1A0	5' exon	full	CTD-2015G9.2	lincRNA	0	0	3.7047	0	0	0
chr18:55355842-55356178	MLT1A0	5' exon	partial	ATP8B1	protein_coding	0	0.1187	0	0	0.6409	0
chr3:141719018-141719378	MLT1A0	5' exon	partial	TFDP2	protein_coding	0	1.1198	0	1.5899	0.9116	0.4205
chr3:125744357-125744645	MLT1A0	5' exon	partial	SLC41A3	protein_coding	0	0.0848	0.0431	0.0016	0.0008	0.0119
chr10:123886362-123886735	MLT1A0	5' exon	partial	TACC2	protein_coding	0	0	0	0.1223	0	0
chr19:38104682-38105044	MLT1A0	5' exon	partial	ZNF540	protein_coding	2.5742	2.1017	2.7198	0.0092	0.128	0.1059
chr5:64857278-64857418	MLT1A0	5' exon	partial	CENPK	protein_coding	1.4927	3.8513	3.5525	5.4229	5.7321	2.644
chr11:130750762-130751112	MLT1A0	5' exon	partial	SNX19	protein_coding	0	0.1014	0.0499	0.1468	0.1833	0
chr11:18751974-18752294	MLT1A0	5' exon	partial	PTPN5	protein_coding	0	0.5981	0.5666	0.996	0.0043	0.0197
chr17:74846071-74846429	MLT1A0	5' exon	partial	LINC00868	lincRNA	0	0	0	0	0.2847	0
chr5:4866051-4866313	MLT1A0	5' exon	partial	CTD-2161F6.1	lincRNA	2.4465	1.2368	0.1259	0.5094	0.5642	0.694
chr19:48766109-48766474	MLT1A0	3' exon	full	CTC-241F20.4	lincRNA	0	0	0	0	0.4568	1.5301
chr8:25634690-25635018	MLT1A0	3' exon	full	RP11-219J21.2	lincRNA	0	0.1042	0	1.3573	0.5237	0
chr10:77039436-77039787	MLT1A0	3' exon	full	ZNF503	protein_coding	1.6465	9.1237	4.524	3.1448	2.5546	0.0393
chr17:81125073-81125415	MLT1A0	3' exon	full	AC139099.4	lincRNA	0.6868	5.0205	2.0703	1.6032	0.5079	0
chr1:113153030-113153377	MLT1A0	3' exon	full	ST7L	protein_coding	0.1861	1.1682	0	0.4691	0.4912	1.5495
chr2:190682987-190683319	MLT1A0	3' exon	full	PMS1	protein_coding	0	0	0.7367	0	0	0.0325
chr7:2406702-2407067	MLT1A0	3' exon	partial	EIF3B	protein_coding	0	0	0	0.3548	2.9203	0.768
chr11:71166496-71166850	MLT1A0	3' exon	partial	NADSYN1	protein_coding	0.5821	0.3004	0	0.0136	0.3576	0.2444
chr1:144951358-144951763	MLT1A0	3' exon	partial	PDE4DIP	protein_coding	0	0	0	0.688	8.6808	0.197
chr11:7454762-7455117	MLT1A0	3' exon	partial	SYT9	protein_coding	0.0078	0.515	0.4993	0.4715	0.0027	0
chr4:132349941-132350265	MLT1A0	3' exon	partial	RP11-314N14.1	lincRNA	0.1168	0.2651	0.8271	0	0.0016	0
chrX:18680165-18680371	MLT1A0	3' exon	partial	CDKL5	protein_coding	0	0.8542	0.8704	0.3975	0	0
chr13:36900008-36900369	MLT1A0	3' exon	partial	SPG20	protein_coding	0.7284	0.6906	1.6208	0.5716	0.4524	0.6356
chr20:18464975-18465330	MLT1A0	3' exon	partial	POLR3F	protein_coding	0.2401	0.3928	0.0056	0	3.456	6.1836
chr8:38697829-38698144	MLT1A0	3' exon	partial	TACC1	protein_coding	0.7069	3.8257	4.7763	2.6927	3.2016	1.0135
chr12:102179295-102179410	MLT1A0	3' exon	partial	GNPTAB	protein_coding	0.1084	0.1679	0.0413	0.0911	0.248	0.0797
chr2:13897670-13898013	MLT1A0	3' exon	partial	AC016730.1	lincRNA	0.9208	0.6421	0.9713	0	0.9571	0.0087
chr16:58469306-58469604	MLT1A0	3' exon	partial	RP11-481J2.2	lincRNA	0.0997	0	0	0.3393	0.9192	0
chr1:150489915-150490266	MLT1A0	3' exon	partial	LINC00568	lincRNA	0	0	0	0	0.0894	0
chr11:11607387-11607752	MLT1A0	3' exon	partial	GALNT18	protein_coding	0.021	0	0.3802	0.2503	0.0072	0
chr11:111675761-111676112	MLT1A0	3' exon	partial	FDXACB1	protein_coding	0.4908	0.9498	1.1974	0	0.0942	0.0644
chr6:122814291-122814612	MLT1A0	3' exon	partial	PKIB	protein_coding	0.2413	0.8647	0	0	0.6498	0
chr21:25261186-25261515	MLT1A0	3' exon	partial	AP000474.1	lincRNA	0	0	0	0	0.5103	0
chr3:97519529-97519876	MLT1A0	3' exon	partial	ARL6	protein_coding	0.697	1.8753	0.0379	0.9762	0	0
chr7:100178995-100179357	MLT1A0	3' exon	partial	LRCH4	protein_coding	0	0.1429	0.6589	1.0664	0.378	0
chr4:11742682-11743059	MLT1A0	3' exon	partial	RP11-74M11.2	lincRNA	0	0	0	0	0	0
chr2:12271689-12271771	MLT1A0	3' exon	partial	AC096559.1	lincRNA	2.1648	0.502	3.6584	0.9028	0.083	0
chr16:75510941-75510996	MLT1A0	3' exon	partial	CHST6	protein_coding	0	0.0031	0.0116	0.0222	0.7289	0.0537
chr12:1523376-1523696	MLT1A0	3' exon	partial	ERC1	protein_coding	0	0	1.4691	0	0	0
chr6:99879901-99880244	MLT1A0	3' exon	partial	USP45	protein_coding	2.612	2.0193	1.8846	1.3851	0.502	0.1295
chr6:167425102-167425457	MLT1A0	3' exon	partial	FGFR1OP	protein_coding	0	0	0	0	0.5044	0
chr5:1958387-1958704	MLT1A0	3' exon	partial	RP11-259O2.1	lincRNA	0.0916	0.3396	1.0569	0	0.672	0.2883
chr10:7519486-7519847	MLT1A0	internal exon	partial	RP5-1031D4.2	lincRNA	0	0	0.943	0	0	0
chr8:112478336-112478664	MLT1A0	internal exon	partial	RP11-1101K5.1	lincRNA	0.0554	0.3571	0.7906	0	0	0
chrX:129343834-129344189	MLT1A0	internal exon	partial	ZNF280C	protein_coding	0.987	25.3389	45.4768	19.1474	0	0.2072
chr4:189019355-189019676	MLT1A0	internal exon	partial	TRIML2	protein_coding	0	0	0	0	2.9136	2.7641
chr8:15850888-15851222	MLT1A0	internal exon	partial	RP11-77B22.2	lincRNA	0	0	0.7132	0.0477	0	0
chr4:159343240-159343598	MLT1A0	internal exon	partial	RXFP1	protein_coding	0	0	0	0	2.2073	0
chr1:73316192-73316558	MLT1A0	internal exon	partial	RP4-660H19.1	lincRNA	0	0	0	0	1.1395	2.3829
chr8:135893220-135893589	MLT1A0	internal exon	partial	RP11-1057B8.2	lincRNA	54.2877	45.8722	103.358	134.098	30.3326	0.5499
chr21:19399994-19400364	MLT1A0	internal exon	partial	CHODL	protein_coding	2.1113	0	0	0	0.0465	0
chr3:21604517-21604880	MLT1A0	internal exon	partial	ZNF385D	protein_coding	0	0.1723	2.9238	0	0	0
chr5:97229695-97229916	MLT1A0	internal exon	partial	RP11-455B3.1	lincRNA	28.8697	35.2538	17.0848	3.4497	4.9564	0
chr19:44935989-44936303	MLT1A0	internal exon	partial	ZNF229	protein_coding	0	0.2196	0.5835	1.1288	1.2941	0
chr8:104212808-104213162	MLT1A0	internal exon	partial	BAALC	protein_coding	1.1027	0.6694	1.4201	0.2271	1.8597	0
chr4:100731670-100731996	MLT1A0	internal exon	partial	DAPP1	protein_coding	3.9328	6.6822	4.657	0	0	0
chr15:43075301-43075628	MLT1A0	internal exon	partial	TTBK2	protein_coding	0	0.7693	0.0896	1.5386	1.7783	0.1318
chr14:41443479-41443830	MLT1A0	internal exon	partial	RP11-129M6.1	lincRNA	16.826	2.7563	4.0679	3.8343	4.8317	7.0085
chr17:14743361-14743432	MLT1A0	internal exon	partial	AC005863.2	lincRNA	1.397	0	0	0.2446	2.4737	0
chr2:183651502-183651862	MLT1A0	tagging	partial	DNAJC10	protein_coding	0.1119	0.3252	0.2359	0.4084	0.1289	0.9072
chr1:204088364-204088714	MLT1A0	tagging	partial	SOX13	protein_coding	0	0.1705	0.2088	0.0274	0.0543	0
chr1:237064835-237065179	MLT1A0	tagging	partial	MTR	protein_coding	0.8969	0.8028	0.7832	0.7462	0.1697	0.3383
chr5:180261905-180262076	MLT1A0	tagging	partial	LINC00847	lincRNA	0.0498	0.2121	0.0711	0.5583	0	0.0157
chr2:175298023-175298083	MLT1A0	tagging	partial	GPR155	protein_coding	0.0424	0.0484	0.0279	0	0.3204	0.2019
chr19:57134999-57135347	MLT1A0	tagging	partial	ZNF71	protein_coding	0.2887	0.1887	0.1691	0.0787	0.0526	0.0535
chr9:21006139-21006492	MLT1A0	tagging	partial	PTPLAD2	protein_coding	0.043	0.0081	0.0009	0.0903	0	0.1137
chr7:153414-153521	MLT1A0	tagging	partial	AC093627.10	lincRNA	0	0	0	0.0742	0	0
chr2:51144625-51144984	MLT1A0	tagging	partial	NRXN1	protein_coding	0	0	0	0.1003	0	0
chr11:12081604-12081732	MLT1A0	tagging	partial	RP13-631K18.2	lincRNA	0.0377	0.5403	0.4825	0.1041	0.0029	0
chr9:4599497-4599848	MLT1A0	tagging	partial	SPATA6L	protein_coding	1.6862	2.0444	2.0201	2.2504	0.3491	0.0144
chr15:40216135-40216287	MLT1A0	tagging	partial	RP11-325N19.3	lincRNA	0	0.0438	0.0175	0	0.073	0
chr17:15622720-15623027	MLT1A0	tagging	partial	ZNF286A	protein_coding	0.0245	0.0966	0.1755	0.2622	1.9275	0.8042
chr1:247476208-247476580	MLT1A0	tagging	partial	ZNF496	protein_coding	0	0	0	0.0115	0.0207	0.0306
chr19:12636487-12636874	MLT1A0	tagging	partial	ZNF443	protein_coding	0.1177	3.2494	2.8	0.3989	1.3389	1.5072
chr11:768150-768193	MLT1A0	tagging	partial	PDDC1	protein_coding	0.0019	0.0048	0.0053	0	0.0348	0.1146
chr13:76507691-76507854	MLT1A0	tagging	partial	LINC00561	lincRNA	3.3207	1.6686	0.8169	0.4146	0.1027	0
chr16:71485322-71485650	MLT1A0	tagging	partial	ZNF19	protein_coding	0.2682	0.5512	0.6261	0.3643	2.0753	1.5265
chr5:44817652-44818008	MLT1A0	tagging	partial	MRPS30	protein_coding	0.1316	0.216	0.2131	0.0526	0.014	0.122
chr2:8063070-8063434	MLT1A0	tagging	partial	AC007463.2	lincRNA	0.0177	0.1823	2.2872	0.1423	0	0
chr11:61115954-61116274	MLT1A0	tagging	partial	CYB561A3	protein_coding	0.0446	0.267	0.3014	0.2757	0.1025	0.7839
chr1:247473812-247474172	MLT1A0	tagging	partial	ZNF496	protein_coding	0	0	0	0.0115	0.0207	0.0306
chr2:238533597-238533932	MLT1A0	tagging	partial	AC096574.5	lincRNA	0	0.0099	0	0.0054	0.0457	0
chr11:12081151-12081303	MLT1A0	tagging	partial	RP13-631K18.2	lincRNA	0.0377	0.5403	0.4825	0.1041	0.0029	0
chr6:24702638-24702789	MLT1A0	tagging	partial	ACOT13	protein_coding	3.7317	2.8674	4.3131	1.437	1.4792	3.9529
chr6:24702202-24702351	MLT1A0	tagging	partial	ACOT13	protein_coding	3.7317	2.8674	4.3131	1.437	1.4792	3.9529
chr11:12082026-12082091	MLT1A0	tagging	partial	RP13-631K18.2	lincRNA	0.0377	0.5403	0.4825	0.1041	0.0029	0
chr14:105771768-105771957	MLT1A0	tagging	partial	BRF1	protein_coding	0	0	0	0.0003	0.0084	0.0005
chr2:175298283-175298600	MLT1A0	tagging	partial	GPR155	protein_coding	0.0424	0.0484	0.0279	0	0.3204	0.2019
chr2:112969574-112969923	MLT1A0	tagging	partial	ZC3H8	protein_coding	8.4443	3.3196	3.0384	0.8461	0.1444	0.5075
chr6:153309172-153309481	MLT1A0	tagging	partial	MTRF1L	protein_coding	0.0947	0.7552	0.8845	0.717	2.2516	1.5793
chr15:40215751-40215954	MLT1A0	tagging	partial	RP11-325N19.3	lincRNA	0	0.0438	0.0175	0	0.073	0
chr16:19090277-19090629	MLT1A0	tagging	partial	COQ7	protein_coding	0.1481	2.8649	0.3054	0.8122	0.9518	3.7815
chr5:180261454-180261677	MLT1A0	tagging	partial	LINC00847	lincRNA	0.0498	0.2121	0.0711	0.5583	0	0.0157
chr4:186069162-186069517	MLT1A0	tagging	partial	SLC25A4	protein_coding	0.0935	0.0172	0.02	0	0.0625	0.3285
chr17:18562825-18563132	MLT1A0	tagging	partial	TBC1D28	protein_coding	0.0057	0.0073	0.0527	0.0239	0.6084	0.2994
chr1:2570295-2570638	MLT1A0	tagging	partial	TTC34	protein_coding	0.0073	0.0658	0	0.0255	0.0006	0.0019
chr2:72690904-72691267	MLT1A0	tagging	partial	EXOC6B	protein_coding	0.0987	0.1228	0.0537	0.0185	0.0132	0.0093
chr2:202029476-202029817	MLT1A0	tagging	partial	CFLAR	protein_coding	0.0026	0	0	0.1521	0.0092	0.2241
chr4:11477380-11477722	MLT1A0	tagging	partial	RP11-281P23.1	lincRNA	0	0	0	0	0.0372	0
chr9:32452244-32452580	MLT1A0	tagging	partial	ACO1	protein_coding	0.0171	0.9206	0.8681	0.8766	0.4029	0.5872
chr4:169278468-169278823	MLT1A0	tagging	partial	DDX60L	protein_coding	0.2164	0.0855	0.3237	0	0.2005	0
chr6:79581266-79581394	MLT1A0	tagging	partial	IRAK1BP1	protein_coding	0	0	0	0	0.055	0
chr9:21004390-21004732	MLT1A0	tagging	partial	PTPLAD2	protein_coding	0.043	0.0081	0.0009	0.0903	0	0.1137
chr3:120112525-120112894	MLT1A0	tagging	partial	FSTL1	protein_coding	0	0	0	0.0203	0.0005	0.003
chr4:17631875-17632235	MLT1A0	tagging	partial	MED28	protein_coding	0.634	0.8221	1.2664	1.6477	3.3816	2.3464
chr11:124502438-124502784	MLT1A0	tagging	partial	TBRG1	protein_coding	0.6084	1.7215	1.0173	0.4046	4.028	5.1522
chr7:48145139-48145497	MLT1A0	tagging	partial	UPP1	protein_coding	0.4583	0.5119	0.157	0.2779	0.6716	13.033
chr7:153537-153640	MLT1A0	tagging	partial	AC093627.10	lincRNA	0	0	0	0.0742	0	0
chr11:10847901-10848015	MLT1A0	tagging	partial	ZBED5	protein_coding	0.0146	0	0	0.547	1.0639	0.1303
chr11:10847341-10847600	MLT1A0	tagging	partial	ZBED5	protein_coding	0.0146	0	0	0.547	1.0639	0.1303
chr11:45833959-45834289	MLT1A0	tagging	partial	SLC35C1	protein_coding	0.2159	2.2514	1.1085	2.1165	2.7211	0.9
chr4:141305932-141306242	MLT1A0	tagging	partial	SCOC	protein_coding	8.4913	4.3717	5.8941	0.4024	0.9269	4.8773
chr2:135225694-135226055	MLT1A0	tagging	partial	TMEM163	protein_coding	0.0156	0.2419	0.2016	0.0377	0.109	0
chr19:13870234-13870295	MLT1A0	tagging	partial	CCDC130	protein_coding	0	0.0366	0	0.1987	0.1324	0.0695
chr11:19732790-19733128	MLT1A0	tagging	partial	RP11-359E10.1	lincRNA	0	0	0.0423	0	0.597	0
chr1:27659883-27660228	MLT1A0	tagging	partial	TMEM222	protein_coding	0	0.0771	0.0455	0.2819	0.0449	0.1046
chr2:220579176-220579307	MLT1A0	tagging	partial	AC009502.4	lincRNA	0	1.0012	0.6031	1.0759	0.4325	0
chr6:154722297-154722673	MLT1A0	tagging	partial	CNKSR3	protein_coding	0.0004	0.0078	0.0139	0	0.1462	0.0952
chr14:105770943-105770964	MLT1A0	tagging	partial	BRF1	protein_coding	0	0	0	0.0003	0.0084	0.0005
chr15:40826861-40827073	MLT1A0	tagging	partial	C15orf57	protein_coding	0	0	0	0	0.0093	0.0043
chr11:767612-767848	MLT1A0	tagging	partial	PDDC1	protein_coding	0.0019	0.0048	0.0053	0	0.0348	0.1146
chr11:5608604-5608978	MLT1A0	tagging	partial	HBE1	protein_coding	1.1117	1.2213	1.442	0.6331	0.0021	0
chr8:76478287-76478612	MLT1A0	tagging	partial	HNF4G	protein_coding	0	0	0	0	0	0.0349
chr6:143510958-143511323	MLT1A0	tagging	partial	AIG1	protein_coding	0.2821	0.4024	0.3319	0.0707	0.1449	0
chr1:94659980-94660294	MLT1A0	tagging	partial	ARHGAP29	protein_coding	0.0181	0.0336	0.0043	0.004	0.0124	0.0083
chr6:167457389-167457700	MLT1A0	tagging	partial	FGFR1OP	protein_coding	2.5546	2.4705	2.1419	1.5932	0.3014	0.8611
chr12:104164536-104164898	MLT1A0	tagging	partial	NT5DC3	protein_coding	0	0	0	0	0.1087	0
chr14:105771319-105771455	MLT1A0	tagging	partial	BRF1	protein_coding	0	0	0	0.0003	0.0084	0.0005
chr6:116838048-116838412	MLT1A0	tagging	partial	FAM26E	protein_coding	0	0	0	0	0.0063	0.0358
chr17:78391211-78391503	MLT1A0	tagging	partial	ENDOV	protein_coding	0	0	0.2696	0	0	0.0135
chr8:33331309-33331352	MLT1A0	tagging	partial	TTI2	protein_coding	0	0.0168	0	0	0.185	0
chr15:78888031-78888373	MLT1A0	tagging	partial	CHRNA3	protein_coding	1.6168	1.7596	0.8036	1.189	1.8005	0.01
chr19:52392561-52392949	MLT1A0	tagging	partial	ZNF649	protein_coding	0.2623	1.5311	3.6926	3.6227	1.7535	2.3954
chr14:99961042-99961371	MLT1A0	tagging	partial	CCNK	protein_coding	0	0.2382	0.3671	0.0086	0.1022	0
chr11:44082465-44082752	MLT1A0	tagging	partial	ACCSL	protein_coding	60.4749	83.6	45.7974	22.1832	1.3672	0.0038
chr2:183785173-183785563	MLT1A0	tagging	partial	NCKAP1	protein_coding	3.1635	0.9788	1.9107	0.7284	0.4	5.1167
chr5:71657989-71658332	MLT1A0	tagging	partial	CTC-365E16.1	lincRNA	0	0	0.1218	0	0	0.1655
chr8:33331395-33331610	MLT1A0	tagging	partial	TTI2	protein_coding	0	0.0168	0	0	0.185	0
chr6:108841920-108842266	MLT1A0	tagging	partial	LACE1	protein_coding	0.0098	0.1047	0.1264	0.2101	0.136	0.5163
chr1:228590296-228590643	MLT1A0	tagging	partial	TRIM11	protein_coding	0	0.0069	0.0101	0	0.003	0
chr2:202106974-202107333	MLT1A0	tagging	partial	CASP8	protein_coding	0.0205	0.2084	0.2539	0.0413	0.6214	1.7979
chr14:46380692-46381049	MLT1A0	tagging	partial	LINC00871	lincRNA	0.7611	3.0781	3.4228	2.0931	1.2975	0.0022
chr3:179059094-179059448	MLT1A0	tagging	partial	RP11-255C15.3	lincRNA	0	0	0	0.0365	0.0059	0
chr11:4594271-4594423	MLT1A0	tagging	partial	C11orf40	protein_coding	5.3834	32.572	31.014	32.5361	2.5278	0.0236
chr1:228368736-228369039	MLT1A0	tagging	partial	IBA57	protein_coding	0.001	0.0148	0	0	0.0049	0.1673
chr1:147769219-147769567	MLT1A0	tagging	partial	RP11-495P10.7	lincRNA	0	0	0	0	6.34	0.7499
chr10:7602111-7602269	MLT1A0	tagging	partial	ITIH5	protein_coding	0.2134	0.8944	0.7907	0.8842	0.3999	0.0069
chr1:118408695-118409025	MLT1A0	tagging	partial	GDAP2	protein_coding	0.1256	0.951	0.8868	0.0302	0.3386	0.4533
chr2:220805219-220805575	MLT1A1	5' exon	full	AC114765.2	lincRNA	3.1825	3.9413	0.6665	0	0.4345	0.0668
chr10:104724545-104724944	MLT1A1	5' exon	full	CNNM2	protein_coding	0.1653	8.9138	15.264	16.624	9.3551	0.1041
chr4:159913710-159914103	MLT1A1	5' exon	full	C4orf45	protein_coding	0.3178	2.6357	2.3772	2.3212	2.5107	0
chr7:19479645-19480007	MLT1A1	5' exon	full	AC007091.1	lincRNA	7.8834	4.2124	11.9008	0.9147	1.5763	0
chr17:3154820-3155183	MLT1A1	5' exon	full	CTD-2309O5.3	lincRNA	1.4071	4.5018	4.1793	3.7447	2.4015	0
chr14:26596608-26596998	MLT1A1	5' exon	full	RP11-314P15.2	lincRNA	6.7463	19.851	9.3579	11.159	7.3688	0.236
chr15:79000251-79000667	MLT1A1	5' exon	full	CHRNB4	protein_coding	0.7334	1.2165	0.0997	0.1468	0.1431	0.3299
chr2:62974922-62975202	MLT1A1	5' exon	full	EHBP1	protein_coding	0.4629	1.7913	2.7066	0	1.2188	0
chr3:106848656-106848854	MLT1A1	5' exon	full	LINC00882	lincRNA	4.453	1.2672	6.7326	0	11.1093	0.5499
chrX:28905194-28905510	MLT1A1	5' exon	full	IL1RAPL1	protein_coding	0	0.9535	0.8544	0.7764	0.3064	0
chr1:212341359-212341684	MLT1A1	5' exon	full	RP11-15I11.2	lincRNA	0	0	0	3.557	0	0
chr1:70365331-70365661	MLT1A1	5' exon	full	LRRC7	protein_coding	0.6754	2.3961	0.643	0.9066	0.269	0
chr15:58046260-58046533	MLT1A1	5' exon	full	GCOM1	protein_coding	11.4106	23.506	9.2699	6.1084	7.1372	0.1254
chr9:16400339-16400748	MLT1A1	5' exon	full	C9orf92	protein_coding	7.9456	15.2288	15.4734	12.4644	11.9024	0.4289
chr9:33697165-33697504	MLT1A1	5' exon	partial	RP11-384P7.7	lincRNA	0.0618	0.0224	0.0092	0.5327	0.4204	0.0041
chr7:138361020-138361358	MLT1A1	5' exon	partial	SVOPL	protein_coding	0.1929	2.1156	3.8018	3.2698	3.2005	0
chr2:228753925-228754285	MLT1A1	5' exon	partial	DAW1	protein_coding	1.4514	0	0	0.3128	0	0
chr13:96300917-96301276	MLT1A1	3' exon	full	DNAJC3-AS1	lincRNA	1.2885	3.7993	1.2266	2.2774	5.152	0
chr8:87398984-87399355	MLT1A1	3' exon	full	WWP1	protein_coding	1.1054	2.024	0.1358	0	0.7424	0
chr18:66385053-66385418	MLT1A1	3' exon	full	CCDC102B	protein_coding	0.5363	0.2075	1.1741	0.9764	0	0.0563
chr8:27971118-27971436	MLT1A1	3' exon	full	ELP3	protein_coding	0	0.221	0.734	0	0	0
chr2:162053995-162054396	MLT1A1	3' exon	partial	TANK	protein_coding	0	0	0.7766	0	0	0
chr10:125248245-125248639	MLT1A1	3' exon	partial	RP11-282I1.1	lincRNA	1.7931	2.7376	2.7718	0.3341	0.0168	0
chr13:94530419-94530644	MLT1A1	3' exon	partial	GPC6	protein_coding	0.0171	0.2642	0.3412	0	0.0583	0
chr1:174981794-174982151	MLT1A1	3' exon	partial	MRPS14	protein_coding	2.3912	3.994	3.9091	1.1911	3.5594	5.1633
chr2:73276194-73276404	MLT1A1	3' exon	partial	RAB11FIP5	protein_coding	0	0	0	0	0.8225	0.1142
chr18:1368408-1368776	MLT1A1	3' exon	partial	LINC00470	lincRNA	0.0401	0	0.1146	0.0094	1.1281	0.955
chr19:44434131-44434487	MLT1A1	3' exon	partial	ZNF45	protein_coding	0	0	3.1245	0	0	0
chr18:40096007-40096265	MLT1A1	3' exon	partial	LINC00907	lincRNA	0.0024	0	0	0.0723	0	0
chr13:94530930-94531136	MLT1A1	3' exon	partial	GPC6	protein_coding	0.0171	0.2642	0.3412	0	0.0583	0
chr3:48327712-48327771	MLT1A1	3' exon	partial	ZNF589	protein_coding	0	0	0.0375	0	2.6729	0.3362
chr17:76193555-76193685	MLT1A1	3' exon	partial	AFMID	protein_coding	0	0	0	0.2127	23.7161	0.2517
chr11:57823285-57823497	MLT1A1	internal exon	partial	OR9Q1	protein_coding	1.0478	0.9011	0.3325	0.6115	0	0
chr12:133769932-133770296	MLT1A1	internal exon	partial	ZNF10	protein_coding	0	0.0829	0	1.4849	7.0398	4.3836
chr11:125809742-125810126	MLT1A1	internal exon	partial	RP11-680F20.5	lincRNA	0.7169	1.2023	0.6142	0.9037	0.0734	0
chr13:73421415-73421749	MLT1A1	internal exon	partial	PIBF1	protein_coding	0	0	0.5962	0	1.4963	0
chr18:1137737-1138129	MLT1A1	internal exon	partial	RP11-78F17.1	lincRNA	0	0	0	0	3.0084	0
chr2:150226845-150227213	MLT1A1	internal exon	partial	LYPD6	protein_coding	0	0	0	0	0.3558	0
chr2:204361717-204362076	MLT1A1	internal exon	partial	RAPH1	protein_coding	0	0	0.3202	0	3.9893	0
chr16:87171986-87172355	MLT1A1	internal exon	partial	FBXO31	protein_coding	0	0	0	0	0.317	0.4874
chr8:1732466-1732582	MLT1A1	tagging	partial	CLN8	protein_coding	0.2736	0.4391	0.0584	0.2044	0.3169	0.2272
chr2:128601700-128601927	MLT1A1	tagging	partial	RP5-935K16.1	lincRNA	0.0861	0.0165	0.1458	0.0335	0	0.0067
chr2:86739242-86739599	MLT1A1	tagging	partial	RNF103	protein_coding	2.2201	2.3397	1.3961	2.4636	1.1207	1.7002
chr2:73276683-73276834	MLT1A1	tagging	partial	RAB11FIP5	protein_coding	0	0	0	0	0.8225	0.1142
chr21:29405158-29405346	MLT1A1	tagging	partial	AL035610.2	lincRNA	0.2135	0.2268	1.2614	0.5256	0.0075	0
chr8:1732113-1732169	MLT1A1	tagging	partial	CLN8	protein_coding	0.2736	0.4391	0.0584	0.2044	0.3169	0.2272
chr6:58239015-58239400	MLT1A1	tagging	partial	XXbac-BPGBPG55C20.2	lincRNA	0.0255	0.0328	0.023	0	0.0834	0.02
chr14:60611037-60611411	MLT1A1	tagging	partial	DHRS7	protein_coding	0	0	0	0	0.6839	0.9915
chr3:8918836-8919190	MLT1A1	tagging	partial	RAD18	protein_coding	0.073	1.6293	1.2969	1.497	0.4168	1.9192
chr12:123436438-123436786	MLT1A1	tagging	partial	ABCB9	protein_coding	0	0.0928	0.004	0.1304	0.1864	0.0044
chr2:72689520-72689897	MLT1A1	tagging	partial	EXOC6B	protein_coding	0.0987	0.1228	0.0537	0.0185	0.0132	0.0093
chr1:178516464-178516625	MLT1A1	tagging	partial	TEX35	protein_coding	0	0	0	0	0.2058	0
chr19:58517200-58517437	MLT1A1	tagging	partial	CTD-2368P22.1	protein_coding	0.0013	0	0.0097	0	0.0393	0.0121
chr8:1732641-1732720	MLT1A1	tagging	partial	CLN8	protein_coding	0.2736	0.4391	0.0584	0.2044	0.3169	0.2272
chr2:179375190-179375479	MLT1A1	tagging	partial	PLEKHA3	protein_coding	2.6544	0.6792	0.838	0.2313	0.4412	0.8278
chr18:40096574-40096728	MLT1A1	tagging	partial	LINC00907	lincRNA	0.0024	0	0	0.0723	0	0
chr1:147115563-147115925	MLT1A1	tagging	partial	ACP6	protein_coding	0.0945	0.1548	0.0267	0.0304	0.0593	0.0241
chr2:206981931-206981969	MLT1A1	tagging	partial	NDUFS1	protein_coding	0	0.0604	0.0212	0.0595	0.2617	0.9559
chr1:178516932-178517144	MLT1A1	tagging	partial	TEX35	protein_coding	0	0	0	0	0.2058	0
chr2:128601249-128601400	MLT1A1	tagging	partial	RP5-935K16.1	lincRNA	0.0861	0.0165	0.1458	0.0335	0	0.0067
chr20:25654804-25655216	MLT1A1	tagging	partial	ZNF337	protein_coding	0.07	3.1745	4.1522	3.7643	1.1438	0.9775
chr16:48389096-48389461	MLT1A1	tagging	partial	LONP2	protein_coding	1.3069	1.5138	1.8768	1.8561	0.2724	0.4312
chr5:179869825-179870052	MLT1A1	tagging	partial	CTC-573N18.1	lincRNA	0.0535	0.1899	0.4203	0	0	0.2247
chr6:127759984-127760373	MLT1A1	tagging	partial	SOGA3	protein_coding	0	0	0	0	0.1337	0.0073
chr13:24334525-24334880	MLT1B	5' exon	full	MIPEP	protein_coding	6.4783	3	0.3163	0	0	0
chr6:10434833-10435225	MLT1B	5' exon	full	LINC00518	lincRNA	0	0	0	0	0.1575	0
chr1:65456903-65457191	MLT1B	5' exon	full	RP11-182I10.3	lincRNA	0	0	0	0.0278	0.0068	0
chr8:87632461-87632774	MLT1B	5' exon	full	CNGB3	protein_coding	0	0.0619	0.6849	0	0	0
chr10:82274909-82275326	MLT1B	5' exon	partial	TSPAN14	protein_coding	0	0.3178	0.2875	0.0946	0.3608	0.1752
chr10:92757331-92757752	MLT1B	5' exon	partial	RP11-236B18.5	lincRNA	0	0	0	0	0.1093	0
chr1:162825567-162825980	MLT1B	5' exon	partial	C1orf110	protein_coding	0	0	0	0	0.1624	0.0454
chr5:138490935-138491132	MLT1B	5' exon	partial	SIL1	protein_coding	0	0	0	0	0.4241	0
chr5:117260632-117260823	MLT1B	5' exon	partial	CTD-3179P9.1	lincRNA	8.7328	8.9984	3.2939	1.577	0.15	0
chr19:48571182-48571279	MLT1B	5' exon	partial	PLA2G4C	protein_coding	0	0.8724	4.4141	0	0	0
chr16:34472647-34472777	MLT1B	5' exon	partial	RP11-488I20.8	lincRNA	7.9507	0.8746	4.7231	0	0	0
chr2:2836974-2837269	MLT1B	5' exon	partial	AC011995.1	lincRNA	0.2328	1.6708	0.5818	0.0102	0	0
chr15:66407855-66407944	MLT1B	5' exon	partial	MEGF11	protein_coding	0.023	1.0389	1.0732	1.332	0.2094	0
chr22:45551377-45551520	MLT1B	5' exon	partial	CTA-217C2.2	lincRNA	0	0	0	0	0.0147	0.2569
chr1:228585386-228585764	MLT1B	5' exon	partial	TRIM11	protein_coding	0	0.2088	0.1185	0	0	0
chr1:112031784-112032185	MLT1B	5' exon	partial	ADORA3	protein_coding	0	0	0	0	0.1764	0
chr9:82506590-82506966	MLT1B	5' exon	partial	RP11-403N16.3	lincRNA	0	0.0292	0	0	0	0
chr7:962567-962856	MLT1B	5' exon	partial	ADAP1	protein_coding	0	0	0.3045	0	0	0
chr14:61550104-61550493	MLT1B	3' exon	full	MNAT1	protein_coding	0.9729	1.3597	0	0	0.5258	1.1063
chr5:112465095-112465336	MLT1B	3' exon	full	MCC	protein_coding	4.1455	0	0.8456	6.8433	1.7182	0
chr19:14436075-14436436	MLT1B	3' exon	full	CTC-548K16.2	lincRNA	0	0	0	0	0	2.2484
chr15:81711087-81711513	MLT1B	3' exon	full	CTD-2240J17.1	lincRNA	0	0	0	0	3.4186	0
chr12:98506762-98507132	MLT1B	3' exon	full	RP11-690J15.1	lincRNA	0	0.0614	1.6322	0	0	0
chr18:68019105-68019394	MLT1B	3' exon	full	RP11-41O4.1	protein_coding	0.354	0	0	0.0397	0.0483	0
chr4:104374564-104374958	MLT1B	3' exon	full	RP11-328K4.1	lincRNA	0	0.7446	0	0	0	1.8175
chr5:133539050-133539401	MLT1B	3' exon	full	PPP2CA	protein_coding	0	0	0	0	4.0682	0
chr3:133316974-133317342	MLT1B	3' exon	full	TOPBP1	protein_coding	0	0	0	0	1.0502	0.9563
chr6:105384205-105384558	MLT1B	3' exon	partial	LINC00577	lincRNA	0.2276	1.4229	0.1167	0	0.1076	0.0368
chr15:33738572-33738957	MLT1B	3' exon	partial	RYR3	protein_coding	0	0.1565	0.3464	0	0	0
chr17:76546451-76546832	MLT1B	3' exon	partial	DNAH17	protein_coding	0	0.8999	0.7223	0.33	0.188	0
chr2:122554066-122554430	MLT1B	3' exon	partial	AC018737.3	lincRNA	4.1289	6.6992	3.3767	4.0839	1.1091	0
chr1:63895128-63895476	MLT1B	3' exon	partial	ALG6	protein_coding	0	0	0	0	0	0.8196
chr2:198281052-198281408	MLT1B	3' exon	partial	SF3B1	protein_coding	0	1.0223	7.4415	10.754	2.3612	0.6969
chr2:2828402-2828774	MLT1B	3' exon	partial	AC011995.1	lincRNA	0	1.0497	1.3688	0	0	0
chr5:97257754-97258175	MLT1B	3' exon	partial	RP11-455B3.1	lincRNA	3.6429	4.7835	4.2777	2.751	0.7003	0
chr19:57093947-57094308	MLT1B	3' exon	partial	ZNF470	protein_coding	0	0	0	0.0551	0	0.2479
chr5:6986444-6986833	MLT1B	3' exon	partial	RP11-122F24.1	lincRNA	7.6268	1.7111	1.1655	1.4469	0	0
chr19:43330980-43331076	MLT1B	3' exon	partial	AC004603.4	lincRNA	0	1.241	1.5118	0.1176	0	0
chr6:44859872-44860275	MLT1B	3' exon	partial	SUPT3H	protein_coding	0	0	0.4419	0	0	0
chr12:104406452-104406856	MLT1B	3' exon	partial	GLT8D2	protein_coding	0	0	0	0.021	0.1843	0
chr7:33138570-33138753	MLT1B	3' exon	partial	RP9	protein_coding	0.0843	7.5346	11.5414	2.466	4.1815	1.5492
chr10:76078991-76079401	MLT1B	3' exon	partial	ADK	protein_coding	3.3964	2.1334	1.5404	0.66	0.5948	0
chr8:123712464-123712562	MLT1B	3' exon	partial	RP11-973F15.2	lincRNA	0	0	0	0	0.2906	0
chr13:95136737-95137146	MLT1B	3' exon	partial	DCT	protein_coding	0	0.0648	0.5735	0	0.1314	0
chr9:9761928-9762038	MLT1B	3' exon	partial	PTPRD	protein_coding	0.1368	0.8014	1.3075	3.2569	0.0136	0.006
chr3:38398309-38398695	MLT1B	3' exon	partial	XYLB	protein_coding	0	0	0	0	0.0787	0.0202
chr2:88829959-88830357	MLT1B	3' exon	partial	TEX37	protein_coding	0.8254	1.085	3.9734	4.7915	10.7448	3.2109
chr16:21263553-21263808	MLT1B	3' exon	partial	ANKS4B	protein_coding	0.0807	2.1029	1.1722	1.541	0.2343	0
chr6:10829040-10829256	MLT1B	3' exon	partial	SYCP2L	protein_coding	1.2446	0.6244	0	0	0	2.141
chr3:179128168-179128552	MLT1B	3' exon	partial	GNB4	protein_coding	0	0	0.2375	0	0.2895	0.4452
chr21:42691720-42692044	MLT1B	internal exon	partial	FAM3B	protein_coding	0	0.0982	0	0.2948	0	0.0141
chr2:188394020-188394397	MLT1B	internal exon	partial	TFPI	protein_coding	0	0	0	0	0	0.7617
chr11:36415386-36415638	MLT1B	internal exon	partial	PRR5L	protein_coding	0	0.3176	0	0	0.14	0
chr19:2109362-2109639	MLT1B	internal exon	partial	AP3D1	protein_coding	0.0078	0.3724	0.453	0.3824	0.1465	1.9816
chr19:37353658-37354052	MLT1B	internal exon	partial	ZNF345	protein_coding	0	0	0	0	2.447	3.913
chr21:42692338-42692398	MLT1B	internal exon	partial	FAM3B	protein_coding	0	0.0982	0	0.2948	0	0.0141
chr1:61065721-61065900	MLT1B	internal exon	partial	RP11-776H12.1	lincRNA	1.9223	0	0	0	0	0
chr19:55561960-55562151	MLT1B	internal exon	partial	GP6	protein_coding	0	0.087	0	0	1.1355	0.2359
chr1:61007893-61008283	MLT1B	internal exon	partial	RP11-776H12.1	lincRNA	0	0	0	0	4.2249	0
chr2:75161106-75161510	MLT1B	internal exon	partial	AC104135.3	lincRNA	0	1.2059	0.6992	1.3093	0	0
chr4:140525673-140526050	MLT1B	internal exon	partial	SETD7	protein_coding	0	0	0	0	4.3173	0
chr19:7686770-7687148	MLT1B	internal exon	partial	XAB2	protein_coding	0	0.1813	0.0284	0.0597	0.0436	0.0045
chr12:46863763-46864106	MLT1B	internal exon	partial	RP11-96H19.1	lincRNA	0	2.0767	7.4852	5.8102	0.8242	0
chr17:15419659-15420045	MLT1B	internal exon	partial	TVP23C	protein_coding	0	0	0	0	1.2154	0.089
chr2:12145507-12145855	MLT1B	internal exon	partial	AC096559.1	lincRNA	2.033	0.3934	3.5803	0	0	0
chr9:115233966-115234018	MLT1B	tagging	partial	HSDL2	protein_coding	0.2553	0.4673	1.5633	0.6258	0.04	0.7858
chr1:16067072-16067191	MLT1B	tagging	partial	SLC25A34	protein_coding	0.0313	0	0.003	0	0.0011	0.0658
chr19:9719014-9719211	MLT1B	tagging	partial	ZNF561	protein_coding	0.5675	3.0886	1.7987	0.9199	2.8328	5.0119
chr6:142545131-142545359	MLT1B	tagging	partial	VTA1	protein_coding	6.7577	4.793	4.8289	1.0969	1.0865	3.4704
chr12:92876708-92877090	MLT1B	tagging	partial	RP11-693J15.5	lincRNA	0	0	0	0.0114	0.1701	0
chr2:160550500-160550876	MLT1B	tagging	partial	AC009961.3	lincRNA	0	0	0.0438	0	0.067	0.1513
chr17:33765971-33766355	MLT1B	tagging	partial	SLFN13	protein_coding	0	0	0	0	0.1386	0.0285
chr12:70827260-70827436	MLT1B	tagging	partial	KCNMB4	protein_coding	0	0.0692	0.0017	0.3156	0.3095	1.4718
chr21:44177811-44178060	MLT1B	tagging	partial	PDE9A	protein_coding	0	0	0.0028	0.0351	0	0
chr2:175648069-175648464	MLT1B	tagging	partial	AC018890.4	lincRNA	0	0.0723	0	0	0	0
chr22:18260174-18260526	MLT1B	tagging	partial	LINC00528	lincRNA	0.0032	0.0122	0.003	0	0	0
chr6:100005694-100005927	MLT1B	tagging	partial	CCNC	protein_coding	0.0104	0.0738	0.1882	0.0692	1.355	0.2676
chr7:21604683-21605030	MLT1B	tagging	partial	DNAH11	protein_coding	3.2179	21.3456	16.8994	10.335	0.4605	0.0066
chr18:12978204-12978637	MLT1B	tagging	partial	SEH1L	protein_coding	0.2431	0.3609	0.438	0.5017	1.2601	0.3128
chr19:9718467-9718546	MLT1B	tagging	partial	ZNF561	protein_coding	0.5675	3.0886	1.7987	0.9199	2.8328	5.0119
chr21:34170577-34170631	MLT1B	tagging	partial	C21orf49	protein_coding	0	0	0.0032	0	0.0206	0
chr3:8920908-8921257	MLT1B	tagging	partial	RAD18	protein_coding	0.073	1.6293	1.2969	1.497	0.4168	1.9192
chr2:224843499-224843861	MLT1B	tagging	partial	SERPINE2	protein_coding	0.2068	0.7533	1.1204	0.4891	1.3739	0.1392
chr4:6206280-6206636	MLT1B	tagging	partial	RP11-586D19.2	lincRNA	0	0	0	0	0.0096	0
chr6:100005278-100005400	MLT1B	tagging	partial	CCNC	protein_coding	0.0104	0.0738	0.1882	0.0692	1.355	0.2676
chr21:44177596-44177766	MLT1B	tagging	partial	PDE9A	protein_coding	0	0	0.0028	0.0351	0	0
chr7:127939840-127940153	MLT1B	tagging	partial	RBM28	protein_coding	0.0113	0.0458	0.047	0.0619	0.9022	0.3081
chr16:75795165-75795467	MLT1B	tagging	partial	TERF2IP	protein_coding	0	0	0	0	1.283	0
chr19:58054080-58054269	MLT1B	tagging	partial	ZNF550	protein_coding	0.1154	0.2075	0.1032	0.0759	0.0931	0.5211
chr9:32451158-32451436	MLT1B	tagging	partial	ACO1	protein_coding	0.0171	0.9206	0.8681	0.8766	0.4029	0.5872
chr15:59428121-59428542	MLT1B	tagging	partial	MYO1E	protein_coding	0.0268	0.5942	0.1836	0.6358	0.4095	0.2586
chr8:144665158-144665504	MLT1B	tagging	partial	EEF1D	protein_coding	0.1256	0.1016	0.4278	0.774	1.7962	3.5654
chr16:23534974-23535369	MLT1B	tagging	partial	EARS2	protein_coding	0	0.3631	1.5003	0.8278	7.8002	2.5404
chr22:44565477-44565574	MLT1B	tagging	partial	PARVB	protein_coding	0.0235	0.0566	0.0283	0	0.0091	0.0049
chr19:14819505-14819729	MLT1B	tagging	partial	ZNF333	protein_coding	0	0	0	0	0.0703	0
chr9:9762824-9763146	MLT1B	tagging	partial	PTPRD	protein_coding	0.1368	0.8014	1.3075	3.2569	0.0136	0.006
chr6:154711799-154711932	MLT1B	tagging	partial	CNKSR3	protein_coding	0.0004	0.0078	0.0139	0	0.1462	0.0952
chr2:47936298-47936461	MLT1B	tagging	partial	MSH6	protein_coding	0	0.1226	0.0039	0.0955	0.0212	0.2733
chr19:9761212-9761340	MLT1B	tagging	partial	ZNF562	protein_coding	0.112	2.5729	1.6506	1.1933	1.3046	1.5178
chr1:147115164-147115223	MLT1B	tagging	partial	ACP6	protein_coding	0.0945	0.1548	0.0267	0.0304	0.0593	0.0241
chr12:66530243-66530629	MLT1B	tagging	partial	TMBIM4	protein_coding	0.9536	0.3255	0.3492	0.1849	0.5268	3.6282
chr19:9761106-9761165	MLT1B	tagging	partial	ZNF562	protein_coding	0.112	2.5729	1.6506	1.1933	1.3046	1.5178
chr6:154712234-154712370	MLT1B	tagging	partial	CNKSR3	protein_coding	0.0004	0.0078	0.0139	0	0.1462	0.0952
chr13:85136954-85137081	MLT1B	tagging	partial	LINC00333	lincRNA	0	0	0.7285	0	0	0
chr22:19834094-19834441	MLT1B	tagging	partial	C22orf29	protein_coding	0.1708	0.8133	0.7515	0.5574	0.1195	0.195
chr12:9039284-9039458	MLT1B	tagging	partial	A2ML1	protein_coding	0.0803	0.518	1.1672	0.1387	0	0
chr16:21263099-21263243	MLT1B	tagging	partial	ANKS4B	protein_coding	0.0807	2.1029	1.1722	1.541	0.2343	0
chr1:147114656-147114972	MLT1B	tagging	partial	ACP6	protein_coding	0.0945	0.1548	0.0267	0.0304	0.0593	0.0241
chr22:45551524-45551629	MLT1B	tagging	partial	CTA-217C2.2	lincRNA	0	0	0	0	0.0147	0.2569
chr19:6191376-6191776	MLT1B	tagging	partial	RFX2	protein_coding	0	0	0	0	0.003	0.04
chr5:1726561-1726934	MLT1B	tagging	partial	CTD-2587M23.1	lincRNA	0	0.1249	0.0086	0.0284	0.0815	0
chr9:115233532-115233856	MLT1B	tagging	partial	HSDL2	protein_coding	0.2553	0.4673	1.5633	0.6258	0.04	0.7858
chr6:143816504-143816559	MLT1B	tagging	partial	FUCA2	protein_coding	0.4006	0.4745	0.3939	0	0.1614	0.4757
chr18:32839001-32839156	MLT1B	tagging	partial	ZNF397	protein_coding	0.0052	0	0	0	1.3125	0.3079
chr16:24486662-24487061	MLT1B	tagging	partial	CTD-2313J23.1	lincRNA	0	0	0	0.0143	0.0865	0.0849
chr6:154712666-154712770	MLT1B	tagging	partial	CNKSR3	protein_coding	0.0004	0.0078	0.0139	0	0.1462	0.0952
chr22:32507119-32507497	MLT1B	tagging	partial	SLC5A1	protein_coding	0	0	0	0	0.0398	0
chr7:152509905-152510334	MLT1B	tagging	partial	ACTR3B	protein_coding	0.0035	0.0023	0.0017	0.0281	0	0
chr12:9039777-9039819	MLT1B	tagging	partial	A2ML1	protein_coding	0.0803	0.518	1.1672	0.1387	0	0
chr10:134758132-134758472	MLT1B	tagging	partial	LINC01166	lincRNA	0	0	0.0129	0	0	0.0284
chr12:117900661-117900924	MLT1B	tagging	partial	KSR2	protein_coding	0.0048	0.1578	0.0735	0.0148	0.0658	0
chr14:31915865-31915944	MLT1B	tagging	partial	HEATR5A	protein_coding	0.1295	0.0218	0	0.0099	0.0923	0.3783
chr22:44566180-44566344	MLT1B	tagging	partial	PARVB	protein_coding	0.0235	0.0566	0.0283	0	0.0091	0.0049
chr19:35254409-35254608	MLT1B	tagging	partial	ZNF599	protein_coding	0.598	0.3981	0.337	0	0.0049	0
chr14:31915695-31915839	MLT1B	tagging	partial	HEATR5A	protein_coding	0.1295	0.0218	0	0.0099	0.0923	0.3783
chr6:28196021-28196395	MLT1B	tagging	partial	ZSCAN9	protein_coding	0.1724	0.0114	0.1052	0.034	2.3413	1.6886
chr22:19439601-19439953	MLT1B	tagging	partial	UFD1L	protein_coding	0.3559	0.0417	0.1401	0.0068	0.5571	1.2413
chr17:38149253-38149631	MLT1B	tagging	partial	PSMD3	protein_coding	0	0.5048	0.72	0.2326	0.1785	0.0173
chr20:50450131-50450469	MLT1B	tagging	partial	RP5-1112F19.2	lincRNA	0	0	0	0	0	0
chr13:114625559-114625705	MLT1B	tagging	partial	LINC00452	lincRNA	0	0	0	0	0.3132	0.0288
chrX:73015880-73016265	MLT1B	tagging	partial	TSIX	lincRNA	0	0.0002	0	0.0001	0.0002	0.0581
chr1:209952166-209952555	MLT1B	tagging	partial	TRAF3IP3	protein_coding	0.0152	0.7335	0.4081	0.1235	0	0.0032
chr21:45157942-45158263	MLT1B	tagging	partial	PDXK	protein_coding	0	0	0	0	0.0865	0.0225
chr22:50319607-50319977	MLT1B	tagging	partial	CRELD2	protein_coding	8.4303	14.514	7.0786	8.2296	8.8227	0.6499
chr3:177919426-177919837	MLT1C	5' exon	full	RP11-33A14.1	lincRNA	27.6456	39.6989	60.3664	35.0121	3.7884	0.053
chr7:30603270-30603692	MLT1C	5' exon	full	GGCT	protein_coding	0	0.0687	0.029	0	0	0
chr11:97813343-97813778	MLT1C	5' exon	full	RP11-379J13.2	lincRNA	0	0	0	0	0	0.5009
chr1:55516448-55516758	MLT1C	5' exon	partial	PCSK9	protein_coding	0	0	0	0	0	0
chr4:142247079-142247169	MLT1C	5' exon	partial	RP11-362F19.1	lincRNA	0.3081	0.1155	0.1203	0	0	0.0083
chr12:122331353-122331776	MLT1C	5' exon	partial	WDR66	protein_coding	1.5149	1.9286	3.6812	6.2214	10.6663	4.1916
chr19:50335950-50336360	MLT1C	5' exon	partial	MED25	protein_coding	1.0747	2.298	1.5629	2.9981	0.1317	0.3553
chr11:70011057-70011495	MLT1C	5' exon	partial	ANO1	protein_coding	0.0326	0.5885	0.8996	0.0228	0	0
chr19:48985506-48985951	MLT1C	5' exon	partial	CYTH2	protein_coding	0	0.1175	0.0079	0.0773	0.0151	0.0579
chr7:94994927-94995345	MLT1C	5' exon	partial	PON1	protein_coding	0.2922	0.1199	0.2592	0.2744	0.0986	0.0767
chr7:44157879-44158103	MLT1C	5' exon	partial	POLD2	protein_coding	0	0.1942	0.5731	0.0132	0.0771	0.0395
chr3:133262199-133262616	MLT1C	5' exon	partial	RP11-91K8.5	lincRNA	0	0	0	0	0.5999	0
chr12:50491997-50492426	MLT1C	5' exon	partial	SMARCD1	protein_coding	0	4.6256	6.2813	3.15	4.28	1.648
chr22:50052095-50052550	MLT1C	5' exon	partial	C22orf34	protein_coding	0.1784	1.6497	1.1891	0.5415	1.1776	0
chr2:88804200-88804470	MLT1C	5' exon	partial	TEX37	protein_coding	0.4961	0.2909	3.213	6.1383	12.991	1.0573
chr7:156237924-156238312	MLT1C	5' exon	partial	AC073133.2	lincRNA	0.9047	3.8553	4.0496	0.4983	0.5482	0
chr14:71047926-71048384	MLT1C	3' exon	full	MED6	protein_coding	1.6146	0.6817	3.6049	1.0279	0.8417	0.6471
chr2:7210611-7211063	MLT1C	3' exon	full	RNF144A	protein_coding	0.357	0.1063	1.0718	0	0	0
chr2:70275775-70276160	MLT1C	3' exon	full	ASPRV1	protein_coding	0	0	0	0	2.2028	0.5087
chr4:5759683-5760080	MLT1C	3' exon	full	EVC	protein_coding	0	0.4564	0	0	0.1308	0
chr21:23169271-23169785	MLT1C	3' exon	full	AP000475.2	lincRNA	0	0	0	0	0.1373	0
chr8:106463617-106464015	MLT1C	3' exon	full	ZFPM2	protein_coding	0	1.4006	1.4407	4.3318	0.2246	0.0345
chrX:149997711-149998095	MLT1C	3' exon	full	CD99L2	protein_coding	0.0052	0.2503	0.0649	0	0.383	0
chr18:49088670-49089143	MLT1C	3' exon	full	RP11-267C16.1	lincRNA	0	0	0	0	0.835	0
chr18:28534737-28535179	MLT1C	3' exon	full	RP11-25I11.1	lincRNA	0	0	0	0.0165	18.3642	0
chr5:142298610-142299057	MLT1C	3' exon	full	ARHGAP26	protein_coding	1.3797	1.2876	1.9562	0	2.7956	0
chr3:12539276-12539574	MLT1C	3' exon	full	TSEN2	protein_coding	0.0483	0	0.9196	0.8795	0	0
chr14:37339437-37339899	MLT1C	3' exon	partial	SLC25A21	protein_coding	0	0.443	0	0	0	0
chr19:18005583-18006028	MLT1C	3' exon	partial	SLC5A5	protein_coding	0.0792	0.0541	0.1197	0	9.3305	2.8018
chr10:32803113-32803560	MLT1C	3' exon	partial	C10ORF68	protein_coding	0.7447	0.2888	0.5591	0.0714	0.7277	0.3908
chr5:10505063-10505481	MLT1C	3' exon	partial	RP11-1C1.5	protein_coding	0	0	0.1226	0	0	0
chr6:12934176-12934653	MLT1C	3' exon	partial	PHACTR1	protein_coding	0.8143	0	0.3876	0.4536	0.0063	0.0389
chr15:79154845-79155301	MLT1C	3' exon	partial	MORF4L1	protein_coding	0	0	0.4957	0	0	0
chr12:70613104-70613534	MLT1C	3' exon	partial	RP11-320P7.1	lincRNA	0.2631	0.3771	0.0278	0	0.7832	0
chr6:36107457-36107873	MLT1C	3' exon	partial	MAPK13	protein_coding	0.4678	0.7196	0.4111	0.0063	0.5128	1.6432
chr17:80378004-80378444	MLT1C	3' exon	partial	HEXDC	protein_coding	0	0	0	0.0425	0.0276	0.9864
chr1:209706249-209706574	MLT1C	3' exon	partial	RP1-272L16.1	lincRNA	0	0	1.0468	0	0	0
chr18:2614742-2615170	MLT1C	3' exon	partial	NDC80	protein_coding	0	0	0	0	0	0.2574
chr18:22346512-22346775	MLT1C	3' exon	partial	RP11-449D8.5	lincRNA	0	1.0723	3.3948	0	0	0
chr14:92262765-92263213	MLT1C	3' exon	partial	TC2N	protein_coding	0	0	1.088	0	0	0
chr17:55156464-55156644	MLT1C	3' exon	partial	RP11-166P13.3	lincRNA	0.9029	3.7606	1.6699	1.2466	0.8277	0
chr13:103445424-103445538	MLT1C	3' exon	partial	KDELC1	protein_coding	0.0256	0	0.39	0.7531	1.8091	0
chr12:132675341-132675720	MLT1C	3' exon	partial	RP13-977J11.8	lincRNA	0	0	0	0	0	0
chr4:14744670-14745122	MLT1C	3' exon	partial	LINC00504	lincRNA	10.8997	3.822	0.5014	2.1619	0	0
chr11:3142944-3143178	MLT1C	3' exon	partial	OSBPL5	protein_coding	0	0	0.385	0.5206	0	0.0115
chr8:54825971-54826421	MLT1C	3' exon	partial	RGS20	protein_coding	0	0	0	0	0.3492	0.1846
chrX:14031558-14031974	MLT1C	3' exon	partial	GEMIN8	protein_coding	1.3621	1.3537	3.8503	1.4552	0	0
chr8:74692291-74692727	MLT1C	3' exon	partial	STAU2	protein_coding	0	0	0	0	1.1596	0.7471
chr1:222549755-222550202	MLT1C	3' exon	partial	RP11-400N13.1	lincRNA	0.5874	1.2314	0.6509	0.6171	0.3681	0
chr16:81296083-81296150	MLT1C	3' exon	partial	BCMO1	protein_coding	0	0.5168	0.0159	0.0935	0	0
chr4:1977369-1977679	MLT1C	3' exon	partial	WHSC1	protein_coding	0	1.7671	3.1223	3.0401	0.8364	0
chr8:146063312-146063748	MLT1C	3' exon	partial	ZNF7	protein_coding	0	0	0	0	0.1078	0.034
chr5:69337270-69337705	MLT1C	3' exon	partial	SERF1B	protein_coding	0	0.0332	0.0652	0.009	0.0058	0
chr9:138137391-138137786	MLT1C	3' exon	partial	RP11-399H11.2	lincRNA	0	0	0	0	0	0
chr3:164432028-164432436	MLT1C	3' exon	partial	RP11-71H9.1	lincRNA	1.0181	0	0.5013	0	0	0
chr4:5165852-5166213	MLT1C	3' exon	partial	STK32B	protein_coding	0.0648	0.5348	1.2169	0.5111	0.2373	0
chr11:12082951-12083382	MLT1C	3' exon	partial	RP13-631K18.2	lincRNA	0.0377	0.5403	0.4825	0.1041	0.0029	0
chr16:13872686-13872980	MLT1C	internal exon	partial	U95743.1	lincRNA	0	0	0	0	0.31	0
chr17:26258361-26258798	MLT1C	internal exon	partial	RP11-218F4.1	lincRNA	0	0	0	0	0	1.7302
chr2:238330826-238331277	MLT1C	internal exon	partial	AC112721.1	protein_coding	0	1.0479	0	0	0	0
chr6:22191715-22192166	MLT1C	internal exon	partial	CASC15	lincRNA	1.1351	0	0	0	0	0.2383
chr8:81951419-81951851	MLT1C	internal exon	partial	RP11-172E10.1	lincRNA	0	1.2028	0	0	0	0
chr16:84063643-84063893	MLT1C	internal exon	partial	SLC38A8	protein_coding	0.7543	12.0626	10.6541	7.6748	1.2684	0.2212
chr12:119211284-119211659	MLT1C	internal exon	partial	RP11-357K6.1	lincRNA	0	0	0	0	0	0.4333
chr1:104089206-104089521	MLT1C	internal exon	partial	AMY2B	protein_coding	0.5526	1.2539	1.504	1.3819	1.3682	0.7848
chr4:140525365-140525673	MLT1C	internal exon	partial	SETD7	protein_coding	0	0	0	0	3.6855	0
chr21:44303544-44303955	MLT1C	internal exon	partial	NDUFV3	protein_coding	0	0	0	0	0.1591	0.7525
chr2:34151820-34152164	MLT1C	internal exon	partial	AC009499.1	lincRNA	0	0.6811	0	0.6285	0.2883	0
chr14:94564473-94564925	MLT1C	internal exon	partial	IFI27L1	protein_coding	0	0	1.1551	0	0	0
chr16:10437898-10438123	MLT1C	internal exon	partial	ATF7IP2	protein_coding	0.1075	1.4335	0.4777	0	0.3059	0
chr19:18468735-18469063	MLT1C	internal exon	partial	PGPEP1	protein_coding	0.1048	4.4605	0.4987	0	0.1431	0
chr19:2235024-2235318	MLT1C	internal exon	partial	PLEKHJ1	protein_coding	0	0.2434	0.169	0.3757	0.0265	0.4077
chr2:230127320-230127779	MLT1C	internal exon	partial	PID1	protein_coding	0.0646	0.1249	0.0307	0	1.1789	0
chr14:82074499-82074878	MLT1C	internal exon	partial	RP11-799P8.1	lincRNA	134.679	92.2853	120.971	67.3654	5.2621	0.0554
chr12:3840790-3841221	MLT1C	tagging	partial	EFCAB4B	protein_coding	0.0009	0.0084	0.0497	0.0007	0	0
chr4:140518988-140519077	MLT1C	tagging	partial	SETD7	protein_coding	0	0	0.0013	0.2217	0.1638	0
chr1:1018700-1018746	MLT1C	tagging	partial	C1orf159	protein_coding	0	0.095	0.0073	0	0.2193	0.5731
chr19:2855609-2856027	MLT1C	tagging	partial	ZNF555	protein_coding	0.2924	4.142	5.0818	2.6564	1.4533	0.2655
chr19:4653968-4654173	MLT1C	tagging	partial	TNFAIP8L1	protein_coding	0.0074	0	0	0.0026	0.0465	0.0386
chr5:3418173-3418587	MLT1C	tagging	partial	LINC01019	lincRNA	0	0.138	0.1527	0	0	0
chr1:181029098-181029540	MLT1C	tagging	partial	MR1	protein_coding	0	0	0	0	0.0125	0
chr20:58351986-58352415	MLT1C	tagging	partial	PHACTR3	protein_coding	0.1633	2.7099	2.1276	0.9774	0.1955	0
chr2:217083799-217083964	MLT1C	tagging	partial	RP11-566E18.3	lincRNA	0	0	0.0082	0	0.0022	0.0318
chr21:35820095-35820498	MLT1C	tagging	partial	KCNE1	protein_coding	0.2115	0.1115	0.026	0.1704	0	0
chr20:44171674-44172089	MLT1C	tagging	partial	EPPIN	protein_coding	0	0	0	0	0	0.0055
chr4:6207339-6207747	MLT1C	tagging	partial	RP11-586D19.2	lincRNA	0	0	0	0	0.0096	0
chr17:76199454-76199538	MLT1C	tagging	partial	AFMID	protein_coding	0	0	0	0	0.0417	0
chr8:19252929-19253377	MLT1C	tagging	partial	SH2D4A	protein_coding	81.7629	53.652	50.0559	29.7347	3.7579	0.0814
chr2:231849100-231849139	MLT1C	tagging	partial	SPATA3-AS1	lincRNA	0.0391	0	0	0	0	0
chr16:4801918-4802162	MLT1C	tagging	partial	ZNF500	protein_coding	0.0028	0.0476	0.1596	0.3044	0.0369	0.0596
chr17:78187013-78187251	MLT1C	tagging	partial	SGSH	protein_coding	0.0148	0.1741	0.0835	0.0057	0.1345	0.136
chr8:130852343-130852788	MLT1C	tagging	partial	FAM49B	protein_coding	4.5664	2.0779	2.7119	1.3307	2.5631	11.2661
chr12:38715754-38716215	MLT1C	tagging	partial	ALG10B	protein_coding	0.0477	0.1738	0.4116	0	0.1581	0.2387
chr19:3539540-3539852	MLT1C	tagging	partial	MFSD12	protein_coding	0.0038	0.1391	0.0073	0.0108	0.021	0.0242
chr19:46054562-46054951	MLT1C	tagging	partial	OPA3	protein_coding	0.0071	0.0979	0.0289	0.1075	0.5517	0.2735
chr12:117900065-117900473	MLT1C	tagging	partial	KSR2	protein_coding	0.0048	0.1578	0.0735	0.0148	0.0658	0
chr2:151971454-151971914	MLT1C	tagging	partial	AC018731.3	lincRNA	31.9594	21.0578	19.0632	4.3867	5.0226	0
chr9:140070524-140070902	MLT1C	tagging	partial	ANAPC2	protein_coding	0	0	0	0.0035	0.1056	0.0524
chr18:77732937-77733382	MLT1C	tagging	partial	TXNL4A	protein_coding	0.0413	0.994	0.871	0.4288	5.0063	22.4569
chr16:4801621-4801763	MLT1C	tagging	partial	ZNF500	protein_coding	0.0028	0.0476	0.1596	0.3044	0.0369	0.0596
chr16:459633-460066	MLT1C	tagging	partial	NME4	protein_coding	0	0	0.0422	0	0.0302	0.2882
chr18:22096801-22097034	MLT1C	tagging	partial	RP11-178F10.3	lincRNA	13.6074	138.756	76.6405	37.5148	15.7079	0.1579
chr17:76198897-76199130	MLT1C	tagging	partial	AFMID	protein_coding	0	0	0	0	0.0417	0
chr18:22097072-22097264	MLT1C	tagging	partial	RP11-178F10.3	lincRNA	13.6074	138.756	76.6405	37.5148	15.7079	0.1579
chr5:133844379-133844625	MLT1C	tagging	partial	AC005355.2	lincRNA	0	0.5011	0.1652	0.0347	0	0
chr5:15411730-15412120	MLT1C	tagging	partial	RP1-137K24.1	lincRNA	1.8858	0.524	0.4212	0	0.6016	0
chr16:75632271-75632347	MLT1C	tagging	partial	ADAT1	protein_coding	6.9977	5.9564	7.5394	9.419	1.5431	0.6578
chr9:19057109-19057557	MLT1C	tagging	partial	HAUS6	protein_coding	0.1371	0.1511	0.068	0.002	0.9936	0.8516
chr19:16987940-16988132	MLT1C	tagging	partial	SIN3B	protein_coding	0	0.0125	0.4347	0.0816	0.0066	0
chr14:105225303-105225729	MLT1C	tagging	partial	SIVA1	protein_coding	8.7619	11.967	7.9768	6.9244	5.7129	6.2
chr11:5731005-5731420	MLT1C	tagging	partial	TRIM22	protein_coding	0	0	0	0	0	0.3632
chr2:47566906-47566974	MLT1C	tagging	partial	BCYRN1	lincRNA	0.001	0	0.0116	0	0.0026	0.0021
chr11:28354513-28354756	MLT1C	tagging	partial	METTL15	protein_coding	1.0899	1.2479	1.1271	0.3019	0	1.1692
chr8:145637150-145637403	MLT1C	tagging	partial	SLC39A4	protein_coding	0.2375	0.5612	0.2464	0.7046	0.5274	0.9944
chr3:43588811-43589019	MLT1C	tagging	partial	ANO10	protein_coding	0	0.2246	0.9391	0.7832	0	0
chrX:153795549-153795818	MLT1C	tagging	partial	IKBKG	protein_coding	0	0	0	0	0.0279	0.0067
chr19:44150434-44150478	MLT1C	tagging	partial	PLAUR	protein_coding	0	0	0	0	0.0717	0.0787
chr11:71208223-71208296	MLT1C	tagging	partial	NADSYN1	protein_coding	0.1389	0.2165	0.1652	0.1337	0.0375	0.0425
chr19:4652853-4653035	MLT1C	tagging	partial	TNFAIP8L1	protein_coding	0.0074	0	0	0.0026	0.0465	0.0386
chrX:153737357-153737777	MLT1C	tagging	partial	FAM3A	protein_coding	0	0	0	0	0.0577	0.0535
chr20:6020228-6020676	MLT1C	tagging	partial	CRLS1	protein_coding	49.8653	33.8844	27.469	14.6272	2.9285	3.9893
chr11:11972541-11972945	MLT1C	tagging	partial	USP47	protein_coding	0.3509	1.0065	1.2357	1.0331	1.7967	1.291
chr1:24136100-24136211	MLT1C	tagging	partial	HMGCL	protein_coding	0.0585	0.0581	0.0429	0.3909	0.0522	0.0898
chr13:99097970-99098130	MLT1C	tagging	partial	FARP1	protein_coding	0.0987	1.9582	1.9098	0.5262	0.5069	0.0929
chrX:1582245-1582560	MLT1C	tagging	partial	P2RY8	protein_coding	0	0.0022	0.0194	0	0	0
chr1:24198169-24198340	MLT1C	tagging	partial	CNR2	protein_coding	0	0	0	0	0.0104	0.1767
chr2:231849173-231849267	MLT1C	tagging	partial	SPATA3-AS1	lincRNA	0.0391	0	0	0	0	0
chr8:19679121-19679291	MLT1C	tagging	partial	INTS10	protein_coding	0	0	0.3093	0.2427	0.1242	0.2638
chr4:14863495-14863956	MLT1C	tagging	partial	LINC00504	lincRNA	0.3189	0.5688	1.4199	0.1971	0.0352	0
chr4:68337656-68337929	MLT1C	tagging	partial	CENPC	protein_coding	0	0.0201	0.2228	0.0219	0.5885	1.0481
chr3:170472351-170472781	MLT1C	tagging	partial	CLDN11	protein_coding	0	0	0	0	0	0.1918
chr15:93874301-93874415	MLT1C	tagging	partial	RP11-266O8.1	lincRNA	0	0.2207	0.357	0.3226	0.1101	0
chr16:75631892-75631975	MLT1C	tagging	partial	ADAT1	protein_coding	6.9977	5.9564	7.5394	9.419	1.5431	0.6578
chr19:37381845-37382294	MLT1C	tagging	partial	ZNF829	protein_coding	0.0204	0.4991	0.838	0.3247	0.6084	0.5212
chr4:7099802-7100003	MLT1C	tagging	partial	RP11-367J11.3	lincRNA	0.0933	0	0.0748	0	0.0469	0
chr11:133653904-133654339	MLT1C	tagging	partial	RP11-448P19.1	lincRNA	0	0	0.2429	0	0	0
chr16:80864285-80864595	MLT1C	tagging	partial	RP11-314O13.1	lincRNA	5.6592	3.1183	6.8262	3.0697	2.1178	0.1449
chrX:2255202-2255309	MLT1C	tagging	partial	ZBED1	protein_coding	4.3228	4.0512	2.2878	1.425	0.4036	0.1773
chr16:87687291-87687452	MLT1C	tagging	partial	JPH3	protein_coding	3.527	8.2178	11.1696	6.1768	2.1792	0
chr16:2292489-2292918	MLT1C	tagging	partial	ECI1	protein_coding	0.8997	0.705	2.1611	0.159	2.6978	9.4345
chr2:47566403-47566597	MLT1C	tagging	partial	BCYRN1	lincRNA	0.001	0	0.0116	0	0.0026	0.0021
chrX:153795097-153795223	MLT1C	tagging	partial	IKBKG	protein_coding	0	0	0	0	0.0279	0.0067
chr8:16229726-16230036	MLT1C	tagging	partial	MSR1	protein_coding	35.6156	27.9197	36.2053	17.7535	19.4978	0.271
chr11:28354051-28354218	MLT1C	tagging	partial	METTL15	protein_coding	1.0899	1.2479	1.1271	0.3019	0	1.1692
chr11:70514229-70514692	MLT1C	tagging	partial	SHANK2	protein_coding	0	0	0	0	0	0
chr19:4653325-4653345	MLT1C	tagging	partial	TNFAIP8L1	protein_coding	0.0074	0	0	0.0026	0.0465	0.0386
chr17:80612996-80613184	MLT1C	tagging	partial	RAB40B	protein_coding	0.3022	0.362	0	0	0.0368	0
chr17:80616658-80617062	MLT1C	tagging	partial	RAB40B	protein_coding	0.1188	0.2996	0.4396	0.0548	0.0009	0.3288
chr2:70276332-70276394	MLT1C	tagging	partial	ASPRV1	protein_coding	0	0.1746	0	0	0.0019	0.142
chr4:47843812-47843921	MLT1C	tagging	partial	RP11-121C2.2	lincRNA	0.0242	0	0	0	0.0006	0.0441
chr19:509397-509807	MLT1C	tagging	partial	TPGS1	protein_coding	0	0.0153	0	0.0216	0.1117	0.0174
chr8:134252076-134252482	MLT1C	tagging	partial	NDRG1	protein_coding	0	0	0.1135	0.0369	0.0009	0
chr19:419288-419714	MLT1C	tagging	partial	SHC2	protein_coding	0.0285	0.4131	0.1219	0.5034	0.0559	0.0075
chr4:140519490-140519710	MLT1C	tagging	partial	SETD7	protein_coding	0	0	0.0013	0.2217	0.1638	0
chr4:103173898-103174320	MLT1C	tagging	partial	SLC39A8	protein_coding	0.0028	0.0845	0.0027	0.002	0	0
chr1:24198646-24198890	MLT1C	tagging	partial	CNR2	protein_coding	0	0	0	0	0.0104	0.1767
chr1:231373086-231373515	MLT1C	tagging	partial	C1orf131	protein_coding	0.2568	2.0123	1.8958	1.3928	0.5893	0.7111
chr17:78186591-78186707	MLT1C	tagging	partial	SGSH	protein_coding	0.0148	0.1741	0.0835	0.0057	0.1345	0.136
chrX:1582588-1582851	MLT1C	tagging	partial	P2RY8	protein_coding	0	0.0022	0.0194	0	0	0
chr4:47843719-47843813	MLT1C	tagging	partial	RP11-121C2.2	lincRNA	0.0242	0	0	0	0.0006	0.0441
chr7:23216615-23216746	MLT1C	tagging	partial	KLHL7	protein_coding	20.8402	11.987	14.3413	6.6566	0.5299	0.5114
chr1:247462419-247462819	MLT1C	tagging	partial	ZNF496	protein_coding	0.1304	0.7001	0.5418	0.7589	0.3537	0.5586
chr8:19678672-19678947	MLT1C	tagging	partial	INTS10	protein_coding	0	0	0.3093	0.2427	0.1242	0.2638
chr12:114183083-114183265	MLT1C	tagging	partial	RP11-438N16.1	lincRNA	0	0	0	0	0	0.2868
chr16:3703003-3703394	MLT1C	tagging	partial	DNASE1	protein_coding	0	0	0	0.0074	0.1775	0
chr22:18582371-18582772	MLT1C	tagging	partial	PEX26	protein_coding	0.0059	0.0726	0.013	0.0506	0.0237	0.0172
chr2:47565941-47566100	MLT1C	tagging	partial	BCYRN1	lincRNA	0.001	0	0.0116	0	0.0026	0.0021
chr12:9548723-9548841	MLT1C	tagging	partial	RP13-735L24.1	lincRNA	0.0036	0.0185	0.0512	0.9117	0.0465	0.2447
chr11:71207655-71207909	MLT1C	tagging	partial	NADSYN1	protein_coding	0.1389	0.2165	0.1652	0.1337	0.0375	0.0425
chr12:9548432-9548694	MLT1C	tagging	partial	RP13-735L24.1	lincRNA	0.0036	0.0185	0.0512	0.9117	0.0465	0.2447
chr6:123103354-123103611	MLT1C	tagging	partial	FABP7	protein_coding	0	0	0	0	0.0773	0
chr19:2234324-2234428	MLT1C	tagging	partial	PLEKHJ1	protein_coding	0	2.0758	1.603	3.2234	0.2299	3.4565
chr19:17164301-17164462	MLT1C	tagging	partial	HAUS8	protein_coding	0.01	2.3161	0.9453	1.6484	1.2029	0.9581
chr17:8272253-8272295	MLT1C	tagging	partial	RPL26	protein_coding	0.0272	0.005	0	0	0.3693	0.0041
chr16:5065984-5066125	MLT1C	tagging	partial	SEC14L5	protein_coding	0.0396	0.1839	0.1236	0.051	0.0357	0
chr21:41101905-41102400	MLT1C	tagging	partial	AF064860.7	lincRNA	0	0	0	0.0041	0.3318	0
chr4:140520075-140520209	MLT1C	tagging	partial	SETD7	protein_coding	0	0	0.0013	0.2217	0.1638	0
chr4:100468125-100468583	MLT1C	tagging	partial	TRMT10A	protein_coding	0.09	0	0.0147	0	0.4732	5.375
chr16:75631001-75631358	MLT1C	tagging	partial	ADAT1	protein_coding	9.5414	14.8865	5.6273	1.4577	1.2163	3.0762
chrX:149904524-149904942	MLT1C	tagging	partial	MTMR1	protein_coding	0.0148	0.0763	0.9007	0.5522	0.3146	0
chr7:23215732-23216036	MLT1C	tagging	partial	KLHL7	protein_coding	20.8402	11.987	14.3413	6.6566	0.5299	0.5114
chr11:124973309-124973630	MLT1C	tagging	partial	TMEM218	protein_coding	0.1046	0.0755	0.1739	0.0062	0.1247	0.0558
chrX:3771474-3771901	MLT1C	tagging	partial	RP11-706O15.3	lincRNA	0.0284	0	0.0406	0	0.0133	0.0149
chr2:67848850-67849280	MLT1C	tagging	partial	AC010987.5	lincRNA	0.5092	0.9397	0.9089	0.837	0.0097	0
chr15:101108530-101108886	MLT1C	tagging	partial	LINS	protein_coding	0.0298	0.6005	0.6435	0.0134	0.7103	0.3637
chr4:120140311-120140732	MLT1C	tagging	partial	USP53	protein_coding	0	0.0178	0.0937	0	0.0524	0.0634
chr5:6779631-6780096	MLT1C	tagging	partial	RP11-332J15.4	lincRNA	0	0	0	0	0.1031	0
chr11:124972886-124972973	MLT1C	tagging	partial	TMEM218	protein_coding	0.1046	0.0755	0.1739	0.0062	0.1247	0.0558
chr8:90736672-90737202	MLT1D	5' exon	full	RP11-37B2.1	lincRNA	2.2551	0	0	0	0	0
chr14:44601663-44602121	MLT1D	5' exon	full	RP11-305B6.3	lincRNA	0.1641	0.8468	0.7811	0.2873	0.3921	0
chr10:60312889-60313380	MLT1D	5' exon	full	BICC1	protein_coding	0.4644	0.599	0.8104	0	0	0
chr3:41640297-41640658	MLT1D	5' exon	full	ULK4	protein_coding	12.8913	3.4202	6.9695	2.504	1.0876	0
chr4:80748497-80748941	MLT1D	5' exon	full	PCAT4	lincRNA	0.1024	0.1982	0.0975	0	0.5768	0.86
chr11:103174066-103174575	MLT1D	5' exon	full	DYNC2H1	protein_coding	3.916	4.8322	4.5383	2.4643	0	0
chr7:135696206-135696653	MLT1D	5' exon	full	AC009784.3	lincRNA	2.4582	1.8715	0.7289	1.8344	2.0771	0
chr4:81404073-81404519	MLT1D	5' exon	full	C4orf22	protein_coding	0.9348	0.4307	1.0805	0.6546	0.0456	0
chr8:140677302-140677818	MLT1D	5' exon	full	KCNK9	protein_coding	0	1.5631	2.7444	2.0483	0.7559	0
chr6:15354301-15354697	MLT1D	5' exon	full	JARID2	protein_coding	0.3228	1.7488	3.3799	3.6393	0.7051	0
chr12:9528284-9528708	MLT1D	5' exon	full	RP13-735L24.1	lincRNA	2.3564	2.5579	13.2948	7.6273	13.2811	0.9351
chr22:45548218-45548523	MLT1D	5' exon	full	CTA-217C2.1	lincRNA	0.1123	0	0	0	1.3923	1.9246
chr3:4898241-4898685	MLT1D	5' exon	full	AC018816.3	protein_coding	10.4428	2.6357	0.5403	2.7425	0.9686	0
chr16:75111493-75111955	MLT1D	5' exon	full	ZNRF1	protein_coding	0	0	0.6565	0	1.9127	0.2715
chr7:90940373-90940917	MLT1D	5' exon	full	RP11-115N4.1	lincRNA	1.8574	2.1679	3.1153	1.1459	0.9963	0
chr7:31557539-31558015	MLT1D	5' exon	full	CCDC129	protein_coding	0	0	0	0	0.0358	0
chr5:117983178-117983672	MLT1D	5' exon	full	CTD-2281M20.1	lincRNA	15.4714	12.8306	11.7922	2.6997	1.8071	0
chr11:77759590-77760056	MLT1D	5' exon	full	THRSP	protein_coding	1.0594	1.5619	0.9797	1.5687	0	0
chr11:108540325-108540807	MLT1D	5' exon	full	DDX10	protein_coding	0	0.0628	0.602	3.3387	0.5148	0
chr9:9972533-9973007	MLT1D	5' exon	full	PTPRD	protein_coding	8.2004	2.4206	3.4401	2.7741	0.3321	0
chr7:154121337-154121804	MLT1D	5' exon	partial	DPP6	protein_coding	0.2499	0.0806	0.2974	0.1313	0	0
chr15:97970690-97971156	MLT1D	5' exon	partial	CTD-2147F2.2	lincRNA	0	0.0873	1.2237	0.1737	0	0
chr6:112222455-112222949	MLT1D	5' exon	partial	RP1-97J1.2	lincRNA	0	0	0	0	0	0.9838
chr19:50544229-50544491	MLT1D	5' exon	partial	ZNF473	protein_coding	0.0121	0.0052	0	0	1.06	0.0084
chr10:665166-665390	MLT1D	5' exon	partial	DIP2C	protein_coding	0	0.7043	1.1763	0.3421	1.5007	0
chr13:52348249-52348314	MLT1D	5' exon	partial	DHRS12	protein_coding	0	0	0.8644	0.6849	0.0477	0.5132
chr15:40313346-40313779	MLT1D	5' exon	partial	EIF2AK4	protein_coding	0	0.3554	0.6282	0.0583	0.5992	0.0336
chr16:2333685-2334000	MLT1D	5' exon	partial	ABCA3	protein_coding	0	0.0781	0	0	0.0502	0
chr2:8433073-8433584	MLT1D	5' exon	partial	LINC00299	lincRNA	1.1214	0.3176	1.432	0.5172	0	0
chr2:205304945-205305387	MLT1D	5' exon	partial	AC016903.2	lincRNA	0.0908	0.2929	2.334	0.5405	0	0
chr2:3360325-3360554	MLT1D	5' exon	partial	TSSC1	protein_coding	0	0.6276	1.1063	0	0	0
chr16:81964733-81964917	MLT1D	5' exon	partial	PLCG2	protein_coding	0	0.8251	1.0367	1.4769	0.472	0
chr1:181144027-181144483	MLT1D	5' exon	partial	RP11-540K16.1	lincRNA	0	0	0	2.606	2.8519	0
chr5:82606427-82606935	MLT1D	3' exon	full	XRCC4	protein_coding	0.9937	2.345	0.5307	0.1528	3.1768	2.3405
chr12:23040895-23041188	MLT1D	3' exon	full	RP11-114G22.1	lincRNA	1.7657	2.7117	0.1601	0	0.3731	0
chr2:205555017-205555491	MLT1D	3' exon	full	PARD3B	protein_coding	0.944	1.3701	0.995	0	0	0
chr15:86031682-86032166	MLT1D	3' exon	full	AKAP13	protein_coding	0.7595	1.0778	0.8918	0	26.7727	0
chr11:71170915-71171334	MLT1D	3' exon	full	NADSYN1	protein_coding	0	0.1534	0.0162	0	0	0
chr11:22835303-22835760	MLT1D	3' exon	full	SVIP	protein_coding	0	0	0	0	0.3123	0
chr17:58050064-58050508	MLT1D	3' exon	full	RPS6KB1	protein_coding	0	0	0	0.0177	5.8461	2.4358
chr2:200872928-200873421	MLT1D	3' exon	full	C2orf47	protein_coding	0	0	0	0	0	2.0969
chr10:68936331-68936816	MLT1D	3' exon	full	CTNNA3	protein_coding	0	2.3011	0	0.2839	5.1198	0
chr21:37085390-37085828	MLT1D	3' exon	full	AF015720.3	lincRNA	0	0	0	0	0.7824	0
chr1:67997609-67998059	MLT1D	3' exon	full	RP4-763G1.2	lincRNA	0	0	0	0	0	0.7021
chr2:43254921-43255401	MLT1D	3' exon	full	AC016735.2	lincRNA	0	0.7124	0	0	0	0
chr2:785817-786250	MLT1D	3' exon	partial	LINC01115	lincRNA	0	1.2711	0.4966	0	0	0
chr9:18859077-18859541	MLT1D	3' exon	partial	ADAMTSL1	protein_coding	2.866	4.8899	4.7035	1.1942	0.021	0
chrX:22025199-22025605	MLT1D	3' exon	partial	SMS	protein_coding	0	0.0657	0	0.1337	0	0.0267
chr4:170565819-170566256	MLT1D	3' exon	partial	CLCN3	protein_coding	1.3417	1.6651	2.3767	0.3806	2.0464	0.41
chrX:27368545-27369019	MLT1D	3' exon	partial	RP11-268G12.3	lincRNA	0.4086	0.0329	0	0	0	0
chr14:81860770-81861302	MLT1D	3' exon	partial	STON2	protein_coding	0	0	0	0.0039	0	0.0058
chr17:67662538-67662773	MLT1D	3' exon	partial	MAP2K6	protein_coding	0.5335	0.9405	0.9649	0.7845	0.0182	0.0747
chr21:47549632-47549806	MLT1D	3' exon	partial	COL6A2	protein_coding	0.1278	0.5528	0.1503	0.1685	0.6492	0.0158
chr15:27578349-27578840	MLT1D	3' exon	partial	GABRG3	protein_coding	0.4125	0.7832	3.1712	0	0.0744	0
chr10:7509377-7509566	MLT1D	3' exon	partial	RP5-1031D4.2	lincRNA	0.5763	0.0676	3.5907	3.0452	0	0
chr6:75292141-75292338	MLT1D	3' exon	partial	RP11-554D15.3	lincRNA	0.0622	0.2909	0.9177	0	0	0
chr1:13819919-13820234	MLT1D	3' exon	partial	LRRC38	protein_coding	0.1125	1.1123	1.9509	0.4026	0.6185	0.0656
chr6:64426405-64426907	MLT1D	3' exon	partial	PHF3	protein_coding	7.8539	4.1361	5.6961	4.9595	1.4587	1.8776
chr3:9877999-9878097	MLT1D	3' exon	partial	ARPC4-TTLL3	protein_coding	0	0.0484	0	0	0.2972	0.2317
chr5:91438911-91439408	MLT1D	3' exon	partial	RP11-348J24.2	lincRNA	0.8255	1.3312	4.0766	0	0	0
chr11:99738077-99738583	MLT1D	3' exon	partial	CNTN5	protein_coding	3.2862	6.6161	13.1192	6.125	0.8302	0.0054
chr18:2615227-2615667	MLT1D	3' exon	partial	NDC80	protein_coding	0	0	0	0	0	0.2574
chr5:13236781-13237264	MLT1D	3' exon	partial	RP11-419C19.2	lincRNA	0.3041	1.1704	1.1531	0.7058	0.3105	0
chr3:179508153-179508325	MLT1D	3' exon	partial	USP13	protein_coding	0.2374	1.4573	4.13	1.8	0	0
chr3:22229371-22229488	MLT1D	3' exon	partial	ZNF385D	protein_coding	0.5657	1.2259	0.6677	0.0158	0	0
chr11:15102175-15102584	MLT1D	3' exon	partial	CALCB	protein_coding	0	0	0	0	0.0427	0
chr17:60032218-60032722	MLT1D	3' exon	partial	MED13	protein_coding	0.265	11.7258	10.2168	11.1166	3.3106	2.1418
chr22:24143624-24144032	MLT1D	3' exon	partial	SMARCB1	protein_coding	0.0659	2.872	2.4328	3.0259	1.7851	0.0968
chr12:26172967-26173371	MLT1D	3' exon	partial	RASSF8	protein_coding	2.0285	0.587	1.2776	0.2269	0.3001	1.5868
chr16:30362044-30362510	MLT1D	3' exon	partial	CD2BP2	protein_coding	0.0088	0.2112	0.281	0.219	3.3194	0.9266
chr11:12094488-12094946	MLT1D	3' exon	partial	RP13-631K18.3	lincRNA	0.0248	0.0213	0.0865	0.0058	0	0
chr4:98948290-98948364	MLT1D	3' exon	partial	STPG2	protein_coding	1.0156	0.5395	0.7734	0	0	0.0564
chr7:65955873-65956312	MLT1D	3' exon	partial	GS1-124K5.3	lincRNA	0	0	0	0	0.2102	0
chr18:1276060-1276546	MLT1D	internal exon	partial	LINC00470	lincRNA	0	0	0	0	0	5.6168
chr8:35892408-35892533	MLT1D	internal exon	partial	RP11-89M20.2	lincRNA	0.9967	3.9643	4.4276	3.8389	1.786	0
chr3:176354546-176354670	MLT1D	internal exon	partial	RP11-644C3.1	lincRNA	0.0512	0	0.585	0	0.2797	0
chr19:49835235-49835532	MLT1D	internal exon	partial	TEAD2	protein_coding	0.0255	0.1645	0	0.8039	2.5249	1.6868
chr3:197912141-197912569	MLT1D	internal exon	partial	FAM157A	lincRNA	0	0.0407	0	0.0221	0.2045	0.0331
chr8:57567436-57567720	MLT1D	internal exon	partial	RP11-17A4.4	lincRNA	0	0	0	0	0.573	0
chrX:152862703-152863169	MLT1D	internal exon	partial	FAM58A	protein_coding	0	0	0	0	1.1746	0.2007
chr20:43268691-43268772	MLT1D	internal exon	partial	ADA	protein_coding	0	0.1429	0.6852	0	0	0
chr2:199867085-199867540	MLT1D	internal exon	partial	AC018717.1	lincRNA	20.497	5.3222	3.4286	1.0548	0.3353	0
chr7:123186862-123187340	MLT1D	internal exon	partial	NDUFA5	protein_coding	0	0	0	0	9.1244	0.5361
chr16:88098725-88099176	MLT1D	internal exon	partial	BANP	protein_coding	0.3096	4.1267	26.2278	13.5137	1.4441	0.4333
chr13:95918301-95918779	MLT1D	internal exon	partial	ABCC4	protein_coding	0	0	0	0.9352	0.0304	0
chrX:11160631-11161013	MLT1D	internal exon	partial	ARHGAP6	protein_coding	0.0541	0.0175	0.0354	0.0237	0.0035	0
chr16:84172758-84173242	MLT1D	internal exon	partial	HSDL1	protein_coding	0	0	0	0.8517	0.9409	0
chrX:10246772-10247162	MLT1D	internal exon	partial	RP6-1O2.1	lincRNA	4.4452	3.5249	2.174	0.0286	0	0
chr4:130647897-130648388	MLT1D	internal exon	partial	RP11-519M16.1	lincRNA	0	0	0	0	0.5189	0
chr2:51754417-51754856	MLT1D	internal exon	partial	AC007682.1	lincRNA	4.0401	2.3826	1.7582	5.578	0	0
chr16:72651122-72651625	MLT1D	internal exon	partial	AC004158.2	lincRNA	0	0	0	0	1.8922	0.1995
chr7:45111143-45111579	MLT1D	internal exon	partial	CCM2	protein_coding	0	0.1342	0.0835	0	0.0857	0.0172
chr18:58398075-58398351	MLT1D	internal exon	partial	RP11-325K19.1	lincRNA	2.827	0.1658	0	0	0	0
chr16:82543929-82544134	MLT1D	internal exon	partial	RP11-481E4.2	lincRNA	0	0	0	0	1.9074	0
chr1:61061133-61061640	MLT1D	internal exon	partial	RP11-776H12.1	lincRNA	0.4481	0	0	0	0	0.0684
chr1:704742-705170	MLT1D	internal exon	partial	RP11-206L10.2	lincRNA	0	0.2441	0.06	0	0.0646	0.0331
chr16:86014667-86015125	MLT1D	internal exon	partial	RP11-542M13.2	lincRNA	0.4652	1.8422	1.9068	2.2354	0.0154	0
chr2:204966625-204967140	MLT1D	internal exon	partial	AC009965.2	lincRNA	0	0	0	1.6976	0	0
chr13:52350337-52350751	MLT1D	internal exon	partial	DHRS12	protein_coding	0	0	1.4094	0	0	0
chr5:172871951-172872378	MLT1D	internal exon	partial	CTB-32H22.1	lincRNA	0	0.6089	1.2838	4.7696	4.6954	0
chrX:125244124-125244242	MLT1D	internal exon	partial	RP11-13E5.2	lincRNA	0	0	0	0	0	1.2776
chr17:60030659-60031136	MLT1D	internal exon	partial	MED13	protein_coding	0	2.9594	0.273	6.4766	1.5416	0
chr3:21603409-21603475	MLT1D	tagging	partial	ZNF385D	protein_coding	0	0.0496	1.7582	0	0	0
chr2:11284645-11284928	MLT1D	tagging	partial	C2orf50	protein_coding	0.0162	0.096	0	0	0.0309	0
chr10:7509156-7509308	MLT1D	tagging	partial	RP5-1031D4.2	lincRNA	0.1713	0.1934	1.1621	0.6224	0.0146	0
chr3:179507579-179507854	MLT1D	tagging	partial	USP13	protein_coding	0.2374	1.4573	4.13	1.8	0	0
chr18:1268488-1268578	MLT1D	tagging	partial	LINC00470	lincRNA	0	0	0.0042	0.0309	0	0.51
chr5:131979268-131979402	MLT1D	tagging	partial	RAD50	protein_coding	0.1003	2.5416	3.2045	2.1701	0.3367	0.8278
chr17:72600580-72601066	MLT1D	tagging	partial	CTD-2006K23.1	lincRNA	0.0253	0.0402	0.0056	0	0	0
chr2:58260387-58260764	MLT1D	tagging	partial	VRK2	protein_coding	0	0	0	0	2.0261	0
chr7:44868295-44868740	MLT1D	tagging	partial	H2AFV	protein_coding	0.0424	0.2579	0.1038	0.0396	6.7128	2.2148
chr13:96326048-96326285	MLT1D	tagging	partial	DNAJC3-AS1	lincRNA	0.1627	2.0426	2.7564	1.3595	0.3998	0.1973
chr19:38076630-38077063	MLT1D	tagging	partial	ZNF540	protein_coding	0	0	0	0	0.0883	0.1189
chr16:3056535-3056943	MLT1D	tagging	partial	LA16c-380H5.5	lincRNA	0	0	0.0102	0	0.0386	0.1863
chr13:60533494-60533985	MLT1D	tagging	partial	DIAPH3	protein_coding	0.404	1.1615	1.0366	0.5174	0.0026	0.4362
chr3:128882656-128882770	MLT1D	tagging	partial	RP11-434H6.7	lincRNA	0.0203	0	0	0	0	0.3414
chr4:14386926-14387326	MLT1D	tagging	partial	AC006296.2	lincRNA	0.1358	0.0146	0.5277	0.0475	0.0077	0
chr1:93828879-93829338	MLT1D	tagging	partial	DR1	protein_coding	0.6269	0.9736	0.9308	0.2939	3.5766	2.7512
chr8:59361365-59361855	MLT1D	tagging	partial	UBXN2B	protein_coding	0.3444	0.1495	0.2695	0.3664	0.1164	0.2885
chr3:9877625-9877712	MLT1D	tagging	partial	ARPC4-TTLL3	protein_coding	0	0.0484	0	0	0.2972	0.2317
chr8:144665876-144666320	MLT1D	tagging	partial	EEF1D	protein_coding	0.1256	0.1016	0.4278	0.774	1.7962	3.5654
chr7:13932193-13932610	MLT1D	tagging	partial	ETV1	protein_coding	0.0547	0.029	0.2177	0.0118	0.0048	0
chr15:72024137-72024595	MLT1D	tagging	partial	THSD4	protein_coding	0.0215	0	0	0	0	0.0664
chr7:107261902-107262361	MLT1D	tagging	partial	BCAP29	protein_coding	0.1051	0.0814	0.4402	0	0.9758	3.1331
chr10:73471674-73472124	MLT1D	tagging	partial	C10orf105	protein_coding	0	0	0.088	0	0	0
chr10:99763013-99763509	MLT1D	tagging	partial	CRTAC1	protein_coding	6.2673	3.193	3.8148	2.7526	0.8501	0
chr16:88875053-88875126	MLT1D	tagging	partial	CDT1	protein_coding	1.7324	7.2652	5.7522	4.8488	17.2156	11.8228
chr2:739709-739887	MLT1D	tagging	partial	RP13-539J13.1	lincRNA	0.0826	0.9593	0.4607	0	0.004	0
chr2:118598446-118598741	MLT1D	tagging	partial	AC009404.2	lincRNA	0	0.0248	0.0026	0	0.6457	0.3521
chr11:505268-505590	MLT1D	tagging	partial	RNH1	protein_coding	0	0	0.0552	0.018	0.0439	0.0203
chr3:45125815-45126244	MLT1D	tagging	partial	CDCP1	protein_coding	0	0	0	0	0.0227	0.2339
chrX:96856755-96857175	MLT1D	tagging	partial	DIAPH2	protein_coding	1.2534	1.5695	1.0781	0.5915	0.0328	0.0087
chr15:89194520-89194999	MLT1D	tagging	partial	ISG20	protein_coding	0.0025	0	0	0	0.2855	0.0159
chr3:86988818-86989179	MLT1D	tagging	partial	VGLL3	protein_coding	0	0	0	0	0.0634	0
chr1:23410651-23411038	MLT1D	tagging	partial	LUZP1	protein_coding	0.2234	0.73	0.232	0.5243	4.6018	1.0614
chr2:183381598-183381786	MLT1D	tagging	partial	PDE1A	protein_coding	0	3.3525	6.5686	3.8282	2.6917	0
chr3:101716057-101716435	MLT1D	tagging	partial	RP11-221J22.2	lincRNA	0	0	0	0.1649	0.0032	0
chr2:118598745-118598804	MLT1D	tagging	partial	AC009404.2	lincRNA	0	0.0248	0.0026	0	0.6457	0.3521
chr17:74044424-74044885	MLT1D	tagging	partial	SRP68	protein_coding	0.0039	0.3127	0.4057	0.7858	0.6899	0.0205
chr3:100641127-100641360	MLT1D	tagging	partial	ABI3BP	protein_coding	0.2594	0.3849	1.4572	0.2725	0.5314	0
chr19:52374887-52375250	MLT1D	tagging	partial	ZNF649	protein_coding	0	0.4393	0.0295	0	0	0
chr12:66643273-66643757	MLT1D	tagging	partial	IRAK3	protein_coding	0	0	0	0	0.0248	0.0268
chr4:98948356-98948462	MLT1D	tagging	partial	STPG2	protein_coding	1.0156	0.5395	0.7734	0	0	0.0564
chr3:45725376-45725402	MLT1D	tagging	partial	LIMD1	protein_coding	0.0354	0.6568	0.4482	0.1297	0.0346	0.0182
chr3:45724329-45724742	MLT1D	tagging	partial	LIMD1	protein_coding	0.0354	0.6568	0.4482	0.1297	0.0346	0.0182
chr9:15658450-15658911	MLT1D	tagging	partial	CCDC171	protein_coding	0	0.0495	0.0129	0.0174	0	0
chr7:91502431-91502912	MLT1D	tagging	partial	MTERF	protein_coding	0.0195	0	0.0017	0.0012	1.5659	1.4629
chr19:55505197-55505502	MLT1D	tagging	partial	NLRP2	protein_coding	21.9698	32.7348	22.0548	28.0046	5.4103	41.7512
chr7:44614018-44614169	MLT1D	tagging	partial	DDX56	protein_coding	0	0	0	0	0.0535	0
chr12:67961661-67962135	MLT1D	tagging	partial	RP11-542B15.1	lincRNA	2.6389	2.7184	0.7571	0.7191	0.0541	0
chr19:12771870-12771989	MLT1D	tagging	partial	DHPS	protein_coding	0	0.2196	0	0	0.0097	0.0894
chr3:86988392-86988499	MLT1D	tagging	partial	VGLL3	protein_coding	0	0	0	0	0.0634	0
chr5:111354815-111355255	MLT1D	tagging	partial	NREP	protein_coding	1.4291	0.8695	1.5788	0.0099	0.4083	0
chr2:37327415-37327575	MLT1D	tagging	partial	EIF2AK2	protein_coding	0.1722	0.484	0.7088	0.1655	0.0656	0.0114
chr16:88875418-88875490	MLT1D	tagging	partial	CDT1	protein_coding	1.7324	7.2652	5.7522	4.8488	17.2156	11.8228
chr4:113197187-113197682	MLT1D	tagging	partial	TIFA	protein_coding	38.3054	15.5337	12.0106	5.5328	2.0422	0.0092
chr3:101716578-101716760	MLT1D	tagging	partial	RP11-221J22.2	lincRNA	0	0	0	0.1649	0.0032	0
chr2:111133460-111133767	MLT1D	tagging	partial	LINC01106	lincRNA	0	0.1194	0.122	0.0324	0.034	0
chrX:96858969-96859426	MLT1D	tagging	partial	DIAPH2	protein_coding	1.2534	1.5695	1.0781	0.5915	0.0328	0.0087
chr2:11285538-11285582	MLT1D	tagging	partial	C2orf50	protein_coding	0.0162	0.096	0	0	0.0309	0
chr2:183380782-183381071	MLT1D	tagging	partial	PDE1A	protein_coding	1.9426	4.2691	2.8039	0.8427	1.0777	0
chr19:58719724-58720179	MLT1D	tagging	partial	ZNF274	protein_coding	0	0.0024	0	0.0106	0.0926	0.004
chr2:43791375-43791810	MLT1D	tagging	partial	THADA	protein_coding	0.0459	0.0134	0.0366	0.0487	0.0495	0.0683
chr2:110752876-110753163	MLT1D	tagging	partial	LINC01123	lincRNA	0.0078	0.2828	0.0559	0.0521	0.0321	0
chr15:55907068-55907549	MLT1D	tagging	partial	PRTG	protein_coding	1.2589	2.8259	3.1796	2.5169	1.3109	0.0139
chr3:50621764-50622236	MLT1D	tagging	partial	HEMK1	protein_coding	0.0047	0.0121	0	0	0.0468	0.1457
chr19:51859943-51860326	MLT1D	tagging	partial	ETFB	protein_coding	0	0	0.0965	0.0048	0.1706	0.1378
chr8:33831227-33831496	MLT1D	tagging	partial	RP1-273G13.3	lincRNA	9.3645	6.6191	3.8549	1.4341	1.5864	0
chr8:125479069-125479507	MLT1D	tagging	partial	RNF139-AS1	lincRNA	0	0	0	0	0.0593	0
chrX:73014939-73015403	MLT1D	tagging	partial	TSIX	lincRNA	0	0.0002	0	0.0001	0.0002	0.0581
chr5:126380861-126381333	MLT1D	tagging	partial	C5orf63	protein_coding	0.0064	0.0148	0	0.0401	0	0.068
chr17:76552378-76552602	MLT1D	tagging	partial	DNAH17	protein_coding	0	0	0.5231	0	0	0
chr6:2960957-2961405	MLT1D	tagging	partial	SERPINB6	protein_coding	0	0	0	0	0.198	0.5527
chr5:14611226-14611753	MLT1D	tagging	partial	FAM105A	protein_coding	2.3309	1.9615	3.5055	1.7766	1.9471	0.4821
chr16:78100161-78100343	MLT1D	tagging	partial	CLEC3A	protein_coding	0.3356	5.0968	0.4764	0.1045	0.1286	0.0021
chrX:2138018-2138462	MLT1D	tagging	partial	ZBED1	protein_coding	0.151	0.6664	1.4298	0.9239	0.868	0.5714
chr16:78100645-78100705	MLT1D	tagging	partial	CLEC3A	protein_coding	0.3356	5.0968	0.4764	0.1045	0.1286	0.0021
chr11:77187596-77187747	MLT1D	tagging	partial	DKFZP434E1119	protein_coding	0.0037	0.0504	0.0478	0.0156	0.0546	0
chr11:77187449-77187574	MLT1D	tagging	partial	DKFZP434E1119	protein_coding	0.0037	0.0504	0.0478	0.0156	0.0546	0
chr12:81411974-81412529	MLT1E	5' exon	full	ACSS3	protein_coding	0.329	0.5518	1.4094	0.0461	0.3481	0
chr19:55911756-55911854	MLT1E	5' exon	partial	CTD-2105E13.13	lincRNA	0	0.2213	0	0.4169	0.6406	0
chr11:33836301-33836583	MLT1E	3' exon	full	RP11-646J21.2	lincRNA	0.7484	4.7308	0.57	2.0965	0.0255	0.3142
chr17:25316456-25316519	MLT1E	3' exon	partial	RP11-260A9.6	lincRNA	0	0	0	0	0.1278	0
chr3:108049158-108049731	MLT1E	3' exon	partial	HHLA2	protein_coding	0	0.1422	2.1296	0	0	0
chr20:37197350-37197626	MLT1E	tagging	partial	RALGAPB	protein_coding	0.0045	0.2641	0.9831	0.8105	0.8022	0.855
chr22:19772525-19772612	MLT1E	tagging	partial	C22orf29	protein_coding	0	0	0	0.1172	0.0105	0.0237
chr17:25316317-25316428	MLT1E	tagging	partial	RP11-260A9.6	lincRNA	0	0	0	0	0.1278	0
chr8:137178040-137178499	MLT1E1	3' exon	full	RP11-149P24.1	lincRNA	0	0	0	2.3974	0	0
chr17:50141207-50141758	MLT1E1	3' exon	partial	CA10	protein_coding	0.6405	2.4115	0.9955	0.3753	0.3391	0
chr21:31002579-31002872	MLT1E1	3' exon	partial	BACH1	protein_coding	0.1629	0.1261	0.062	0.2967	0.1446	0
chr1:144945961-144946553	MLT1E1	3' exon	partial	PDE4DIP	protein_coding	0	0	0	0	0.2534	0.0312
chr7:147266850-147267413	MLT1E1	3' exon	partial	CNTNAP2	protein_coding	2.042	2.8322	2.3821	0.9341	0	0
chr19:2326103-2326288	MLT1E1	internal exon	partial	LSM7	protein_coding	0	0	0	0	0	0.6255
chr1:95442263-95442724	MLT1E1	tagging	partial	ALG14	protein_coding	0.0314	0.002	0.0066	0	0.0684	1.1253
chr1:95441935-95441969	MLT1E1	tagging	partial	ALG14	protein_coding	0.0314	0.002	0.0066	0	0.0684	1.1253
chr2:8147921-8148452	MLT1E1	tagging	partial	LINC00299	lincRNA	0.0138	0.1244	0	0	0	0
chr15:102173457-102173774	MLT1E1	tagging	partial	TM2D3	protein_coding	0	0	0	0.0015	1.7177	0.1106
chr5:133178728-133179112	MLT1E1A	5' exon	full	FSTL4	protein_coding	0.1449	0.1869	0.6207	1.6744	0	0
chrX:149746387-149746982	MLT1E1A	5' exon	partial	MTM1	protein_coding	2.4144	7.6167	5.7448	2.4948	0.0734	0
chr12:101342503-101343104	MLT1E1A	3' exon	full	ANO4	protein_coding	0	2.4915	0.758	0.3559	0	0
chr16:18121999-18122529	MLT1E1A	3' exon	full	CTA-481E9.4	lincRNA	0	0.2324	0.8233	0.6561	0	0
chr12:10327677-10328165	MLT1E1A	3' exon	full	TMEM52B	protein_coding	0	0	0	0	0	3.5595
chr5:79904397-79904945	MLT1E1A	3' exon	full	CTC-325J23.3	lincRNA	0	0	0	0	0.3239	0.0443
chr5:104253148-104253693	MLT1E1A	3' exon	full	RP11-6N13.1	lincRNA	0	0.0432	1.7363	3.2461	0	0
chr2:199747665-199747815	MLT1E1A	3' exon	partial	AC018717.1	lincRNA	3.4466	0.5158	1.1287	0.8014	0	0
chr5:108559259-108559796	MLT1E1A	3' exon	partial	CTD-2587M2.1	lincRNA	1.994	0.9354	1.4216	0.1209	0.5245	0
chr2:209473374-209473836	MLT1E1A	3' exon	partial	PTH2R	protein_coding	1.6109	4.4774	2.7679	0	0.0179	0
chr16:76669277-76669497	MLT1E1A	3' exon	partial	CNTNAP4	protein_coding	8.7947	9.616	4.0839	0.0751	0.7688	2.1953
chrX:125248759-125249354	MLT1E1A	3' exon	partial	RP11-13E5.2	lincRNA	0	0	0	0	0	0.2574
chr15:24752601-24752699	MLT1E1A	internal exon	partial	PWRN1	lincRNA	0	0.0628	0.3242	0.2725	0.2989	0
chr16:5742233-5742629	MLT1E1A	internal exon	partial	RBFOX1	protein_coding	5.5329	2.3327	2.1798	0.6745	0.0201	0
chr2:218182510-218182903	MLT1E1A	internal exon	partial	DIRC3	protein_coding	0	0.2606	0	0.2223	0.0887	0
chr12:44181135-44181576	MLT1E1A	tagging	partial	IRAK4	protein_coding	0	0	0.1177	0.1116	0.1412	0.0998
chr1:149374207-149374730	MLT1E1A	tagging	partial	RP5-998N21.4	lincRNA	0	0	0	0	0.135	0.0548
chr3:161165339-161165679	MLT1E1A	tagging	partial	RP11-3P17.4	lincRNA	0	0	0	0	0.0017	0
chr19:2715359-2715713	MLT1E1A	tagging	partial	SLC39A3	protein_coding	0.0041	0.7992	0.3566	0.516	0.3878	0.0022
chr12:44181969-44182049	MLT1E1A	tagging	partial	IRAK4	protein_coding	0	0	0.1177	0.1116	0.1412	0.0998
chr22:22908479-22908589	MLT1E1A	tagging	partial	LL22NC03-63E9.3	protein_coding	0	0	0	0	0.0847	0.0195
chr12:10468746-10468927	MLT1E1A	tagging	partial	KLRD1	protein_coding	0	0	0	0.0018	0.1496	0.0693
chr6:111591242-111591551	MLT1E1A	tagging	partial	KIAA1919	protein_coding	0.148	0.2025	0.1825	0.0081	1.1926	0.6579
chr9:100673377-100673958	MLT1E1A	tagging	partial	C9orf156	protein_coding	0.0163	0.696	0.0284	0.4519	0.5543	0.9505
chr8:24214532-24214821	MLT1E1A	tagging	partial	ADAM28	protein_coding	0.3335	0.0569	0.0182	0.0021	0.0231	0
chr19:2735233-2735830	MLT1E1A	tagging	partial	SLC39A3	protein_coding	0	0.0461	0	0.0017	2.3239	0.3029
chr6:111591114-111591175	MLT1E1A	tagging	partial	KIAA1919	protein_coding	0.148	0.2025	0.1825	0.0081	1.1926	0.6579
chr3:160216143-160216454	MLT1E1A	tagging	partial	KPNA4	protein_coding	0	0.0037	0.0117	0.0073	0.478	2.6798
chr3:160216464-160216663	MLT1E1A	tagging	partial	KPNA4	protein_coding	0	0.0037	0.0117	0.0073	0.478	2.6798
chr13:113873646-113874001	MLT1E1A	tagging	partial	CUL4A	protein_coding	0	0	0	0	0.7366	0
chr12:44181879-44181940	MLT1E1A	tagging	partial	IRAK4	protein_coding	0	0	0.1177	0.1116	0.1412	0.0998
chr22:22908465-22908511	MLT1E1A	tagging	partial	LL22NC03-63E9.3	protein_coding	0	0	0	0	0.0847	0.0195
chr19:35256318-35256457	MLT1E1A	tagging	partial	ZNF599	protein_coding	0.598	0.3981	0.337	0	0.0049	0
chr22:22908147-22908474	MLT1E1A	tagging	partial	LL22NC03-63E9.3	protein_coding	0	0	0	0	0.0847	0.0195
chr12:15500953-15501410	MLT1E2	5' exon	full	RERG	protein_coding	0.033	0.3829	1.4599	0.1848	0.2758	0.8828
chr3:61053792-61054360	MLT1E2	5' exon	full	FHIT	protein_coding	0.454	1.0413	1.3447	0.8126	0	0
chr22:48155968-48156308	MLT1E2	5' exon	full	RP11-191L9.4	lincRNA	0	0.2774	0.9554	3.2132	0.0489	0
chr4:118282545-118282733	MLT1E2	5' exon	full	AC113617.1	lincRNA	27.1558	14.6245	8.0015	2.8678	0	0
chr12:130296102-130296651	MLT1E2	5' exon	full	TMEM132D	protein_coding	0.4999	0.5911	0.4957	0.3646	0.0142	0
chr12:77829395-77830012	MLT1E2	5' exon	full	RP1-34H18.1	lincRNA	1.1814	1.031	1.3893	2.2144	0.5693	0
chr8:145215714-145216251	MLT1E2	5' exon	full	MROH1	protein_coding	0	2.5682	3.6905	3.302	68.0237	2.6395
chr7:96293443-96294013	MLT1E2	5' exon	full	SHFM1	protein_coding	0	0	0	0	0.2393	0
chr11:110960704-110961349	MLT1E2	5' exon	partial	RP11-89C3.3	lincRNA	0	0	0	0	0.1118	0.0143
chr19:34888005-34888383	MLT1E2	5' exon	partial	PDCD2L	protein_coding	0.1361	4.7972	3.2682	4.404	1.3523	1.4213
chr12:133720263-133720680	MLT1E2	5' exon	partial	ZNF10	protein_coding	0	0	0	0	0.8704	0.0653
chr21:19351063-19351540	MLT1E2	3' exon	partial	CHODL	protein_coding	4.7114	2.6478	1.9835	0.98	0.0212	0
chr18:46868287-46868865	MLT1E2	3' exon	partial	DYM	protein_coding	0	0.8367	0.6586	0.9993	0.2029	0
chr18:68007033-68007597	MLT1E2	internal exon	partial	RP11-41O4.1	protein_coding	0	0	0	0	1.8994	0
chr7:40723392-40723911	MLT1E2	internal exon	partial	SUGCT	protein_coding	149.919	94.8419	69.4042	41.703	23.0978	0
chr14:92406071-92406667	MLT1E2	internal exon	partial	FBLN5	protein_coding	0	0.9569	0	0	0	0
chr16:5079131-5079577	MLT1E2	tagging	partial	NAGPA	protein_coding	0	0.004	0	0.0109	0.0523	0
chr6:84672224-84672902	MLT1E2	tagging	partial	CYB5R4	protein_coding	0.0224	0.0624	0.0358	0.0013	0.197	0.5765
chr16:89353602-89353826	MLT1E2	tagging	partial	ANKRD11	protein_coding	0	0	0.1647	0.1876	1.006	0.3916
chr5:10269785-10270016	MLT1E2	tagging	partial	CTD-2256P15.5	lincRNA	0.1267	0.9194	0.3468	0.9206	0.0324	0
chr8:144826303-144826503	MLT1E2	tagging	partial	FAM83H-AS1	lincRNA	0.039	0.0805	0.0198	0.0018	0.0204	0.2088
chr16:89353470-89353573	MLT1E2	tagging	partial	ANKRD11	protein_coding	0	0	0.1647	0.1876	1.006	0.3916
chr3:48339017-48339683	MLT1E2	tagging	partial	NME6	protein_coding	0	0	0.1115	0.0182	0.7371	0.0478
chr7:45756251-45756804	MLT1E2	tagging	partial	ADCY1	protein_coding	0.021	0.0009	0.0881	0.0005	0	0.0015
chr2:12203921-12204311	MLT1E2	tagging	partial	AC096559.1	lincRNA	0	0.0584	1.0985	0	0	0
chr9:33697981-33698509	MLT1E2	tagging	partial	RP11-384P7.7	lincRNA	0.0618	0.0224	0.0092	0.5327	0.4204	0.0041
chr2:99237554-99238145	MLT1E2	tagging	partial	MGAT4A	protein_coding	3.6779	2.3888	1.6357	0.352	0.1861	0.2146
chr7:102449010-102449575	MLT1E2	tagging	partial	FAM185A	protein_coding	0.173	1.3075	1.5885	0.4068	0.0042	0.6098
chrX:135924660-135924854	MLT1E2	tagging	partial	RP11-1114A5.4	lincRNA	0	0	0	0	0.0678	0
chr19:34888711-34888781	MLT1E2	tagging	partial	PDCD2L	protein_coding	0.1361	4.7972	3.2682	4.404	1.3523	1.4213
chr15:101849274-101849480	MLT1E3	5' exon	partial	PCSK6	protein_coding	0	0	0	0	0.0245	0
chr4:169849602-169850200	MLT1E3	3' exon	partial	PALLD	protein_coding	0.0576	1.8237	1.1378	1.0176	0.0849	3.7797
chr5:111354510-111354780	MLT1E3	tagging	partial	NREP	protein_coding	1.4291	0.8695	1.5788	0.0099	0.4083	0
chr3:42689289-42689700	MLT1E3	tagging	partial	NKTR	protein_coding	0.4185	0.8329	1.079	1.5541	1.488	1.5035
chr1:16927793-16928418	MLT1E3	tagging	partial	NBPF1	protein_coding	0	0.0255	0.0301	0	0.2927	0.1991
chr5:111355255-111355287	MLT1E3	tagging	partial	NREP	protein_coding	1.4291	0.8695	1.5788	0.0099	0.4083	0
chr3:42689740-42689809	MLT1E3	tagging	partial	NKTR	protein_coding	0.4185	0.8329	1.079	1.5541	1.488	1.5035
chr12:125634621-125634729	MLT1E3	tagging	partial	RP11-158L12.5	lincRNA	0	0	0.0491	0.0361	0.0088	0
chr12:124570897-124571403	MLT1E3	tagging	partial	RP11-214K3.24	lincRNA	0	0.0031	0	0	0.0008	0.1311
chr3:24775820-24776168	MLT1F	5' exon	full	RARB	protein_coding	72.3212	16.3165	22.4599	30.4911	2.2693	0.1702
chr12:79991576-79992039	MLT1F	5' exon	full	PAWR	protein_coding	0	0.8944	0.0388	0.2856	0	0.5993
chr7:17496876-17497407	MLT1F	5' exon	full	AC019117.2	lincRNA	0	0	0	0	2.8664	0
chr4:23004413-23004905	MLT1F	5' exon	full	RP11-412P11.1	lincRNA	0.1497	0.6758	1.0687	0.0524	7.2039	2.4353
chr17:75513020-75513466	MLT1F	5' exon	full	RP11-13K12.2	lincRNA	1.2095	1.2003	4.8182	2.5542	0.8892	0
chr4:130692312-130692834	MLT1F	5' exon	full	RP11-519M16.1	lincRNA	0	0	0	0	0.631	0
chr13:35245219-35245746	MLT1F	5' exon	partial	RP11-266E6.3	lincRNA	2.4563	3.1207	1.488	2.1372	9.413	1.25
chr2:216734784-216735282	MLT1F	5' exon	partial	AC122136.2	lincRNA	0.1782	1.3026	1.2941	0.1525	0.0113	0
chr11:73941697-73941832	MLT1F	5' exon	partial	PPME1	protein_coding	0	0.4836	2.052	0.5907	0.5545	0
chr5:53697457-53697754	MLT1F	3' exon	full	LINC01033	lincRNA	0	0	0	0	3.3058	4.4849
chr22:27174289-27174732	MLT1F	3' exon	full	CTA-211A9.5	lincRNA	0	0	0	0	0.7103	0
chr2:122567096-122567570	MLT1F	3' exon	full	AC018737.3	lincRNA	6.8105	13.0853	4.8477	6.4657	6.5077	11.5813
chr4:111516656-111517151	MLT1F	3' exon	full	RP11-380D23.2	lincRNA	0	0	0	0	2.7279	0
chr11:112498392-112498894	MLT1F	3' exon	full	RP11-65M17.3	lincRNA	1.2563	0.8246	2.5388	1.3429	0.158	0
chr18:4267566-4268076	MLT1F	3' exon	full	DLGAP1	protein_coding	0.6167	0	0.7402	0	0.3295	0.0281
chr16:78790657-78791144	MLT1F	3' exon	full	WWOX	protein_coding	0.2096	0.9124	3.6905	2.0546	0.1252	0.11
chrX:17988205-17988733	MLT1F	3' exon	full	RP3-410B11.1	lincRNA	0	0	0	0	0	0.6415
chr3:108048674-108049138	MLT1F	3' exon	partial	HHLA2	protein_coding	0	0.1422	2.1296	0	0	0
chr2:238743214-238743609	MLT1F	3' exon	partial	LRRFIP1	protein_coding	0.1376	0.3994	0.633	1.9913	0.6066	0.9267
chr4:142198512-142198846	MLT1F	3' exon	partial	RP11-586L23.1	lincRNA	0	0.6047	2.2573	0	0.1129	0
chr8:128701359-128701861	MLT1F	3' exon	partial	CASC11	lincRNA	0	0	0	0	0.0075	0
chr12:23023172-23023642	MLT1F	3' exon	partial	RP11-114G22.1	lincRNA	0.013	0.5533	1.3115	0.0546	0	0
chr20:46317933-46318415	MLT1F	3' exon	partial	SULF2	protein_coding	0	0.5638	0.312	0.6823	0.0901	0
chr14:41444209-41444639	MLT1F	3' exon	partial	RP11-129M6.1	lincRNA	0.2029	0.0327	0	0	0.303	0
chr14:61220499-61220960	MLT1F	3' exon	partial	MNAT1	protein_coding	0.0169	0.4371	0.0323	0	0	0.8891
chr6:10829256-10829478	MLT1F	3' exon	partial	SYCP2L	protein_coding	1.2446	0.6244	0	0	0	2.141
chr11:81590897-81591290	MLT1F	3' exon	partial	RP11-179A16.1	lincRNA	0	0	0	0.2257	0	0
chr15:99895535-99895702	MLT1F	3' exon	partial	LRRC28	protein_coding	0.8025	11.7518	7.6189	4.2531	1.1697	0.7285
chr3:67890831-67891341	MLT1F	internal exon	partial	RP11-81N13.1	lincRNA	0	0	0	0	0.1336	0
chr5:16384103-16384645	MLT1F	internal exon	partial	RP1-167G20.1	lincRNA	0	0	0	0	0	0
chr6:35320351-35320806	MLT1F	internal exon	partial	PPARD	protein_coding	0	0.3601	2.7634	1.9547	53.5057	13.3598
chr4:39643123-39643576	MLT1F	internal exon	partial	RP11-539G18.2	lincRNA	0.8255	1.6862	0.3274	1.5417	0.2583	1.0109
chr5:96448562-96449104	MLT1F	internal exon	partial	CTD-2215E18.1	protein_coding	2.6633	6.7734	6.2297	0.0799	0.0649	1.238
chr5:53699219-53699687	MLT1F	internal exon	partial	LINC01033	lincRNA	0	0	0	0	0.0262	0.645
chr16:24485623-24486109	MLT1F	tagging	partial	CTD-2313J23.1	lincRNA	0	0	0	0.0143	0.0865	0.0849
chr15:89047238-89047662	MLT1F	tagging	partial	MRPL46	protein_coding	0.0532	0.0549	0	0	0	0.0948
chr15:89046881-89046946	MLT1F	tagging	partial	MRPL46	protein_coding	0.0532	0.0549	0	0	0	0.0948
chr3:113436766-113437272	MLT1F	tagging	partial	NAA50	protein_coding	0.9113	1.421	1.3729	0.6365	9.5003	10.295
chr14:50408781-50409271	MLT1F	tagging	partial	RP11-58E21.4	lincRNA	0.1914	0.0359	0.0066	0	0.1176	0
chr19:58791449-58791944	MLT1F	tagging	partial	ZNF544	protein_coding	0	0	0	0.0203	0.7141	0.0739
chr1:233105427-233105515	MLT1F	tagging	partial	NTPCR	protein_coding	0	0.0888	0.0426	0.0493	0.0351	0.6247
chr12:8630448-8630555	MLT1F	tagging	partial	CLEC6A	protein_coding	0	0	0	0	0.0023	4.6951
chr19:56669463-56669763	MLT1F	tagging	partial	ZNF444	protein_coding	0.0111	0.388	0.2743	0.3459	0.141	0.005
chr12:68103222-68103394	MLT1F	tagging	partial	RP11-43N5.1	lincRNA	0	0.1608	0.004	0.0029	0	0
chr19:8921340-8921879	MLT1F	tagging	partial	ZNF558	protein_coding	0.1815	0.9987	0.19	0.305	0.1363	0.0508
chr19:57982877-57983077	MLT1F	tagging	partial	ZNF772	protein_coding	4.1601	3.5281	3.5205	1.0583	0.9499	0.3962
chr10:82291581-82292005	MLT1F	tagging	partial	TSPAN14	protein_coding	0.1615	0.2627	0.2799	0.2871	0.272	0.411
chr3:48418667-48419135	MLT1F	tagging	partial	FBXW12	protein_coding	0	0.307	0.3398	0.2308	0	0
chr3:113008445-113008952	MLT1F	tagging	partial	WDR52	protein_coding	0	0	0	0	0.0716	0.0194
chr20:34132853-34133026	MLT1F	tagging	partial	ERGIC3	protein_coding	0.0501	0.3161	0.2408	0.4299	1.5513	0.5254
chr19:7083826-7084330	MLT1F	tagging	partial	ZNF557	protein_coding	0.0013	0.3055	0.4215	0.3242	3.5987	0.5027
chr16:23534004-23534514	MLT1F	tagging	partial	EARS2	protein_coding	0.0455	0.5134	1.0932	0.0557	2.5731	4.6902
chr20:34131580-34131749	MLT1F	tagging	partial	ERGIC3	protein_coding	0.0501	0.3161	0.2408	0.4299	1.5513	0.5254
chr11:69486760-69487212	MLT1F	tagging	partial	ORAOV1	protein_coding	0	0	0	0.07	0.4519	0.4326
chr19:1597354-1597871	MLT1F	tagging	partial	MBD3	protein_coding	3.3922	0.6228	1.4159	0.964	1.6878	10.7093
chr11:29165676-29165863	MLT1F	tagging	partial	RP11-115J23.1	lincRNA	2.4475	2.0317	0.7901	5.8129	0.4867	0.0223
chr4:159588882-159589025	MLT1F	tagging	partial	C4orf46	protein_coding	0.13	0	0.0084	0.0015	4.6125	2.7045
chr12:68103381-68103626	MLT1F	tagging	partial	RP11-43N5.1	lincRNA	0	0.1608	0.004	0.0029	0	0
chr4:11723866-11724353	MLT1F1	5' exon	full	RP11-281P23.2	lincRNA	0	0	0	1.3589	0	0
chr16:89927946-89928408	MLT1F1	5' exon	partial	SPIRE2	protein_coding	0	0.1068	0	0.0551	0	0
chr4:128596603-128597163	MLT1F1	3' exon	full	INTU	protein_coding	0	0	0	0	0.1588	0
chr1:113420341-113420500	MLT1F1	3' exon	full	RP3-522D1.1	lincRNA	0	0	0	0	0	0.7252
chr9:21324010-21324507	MLT1F1	3' exon	full	KLHL9	protein_coding	4.7926	4.4905	4.9705	2.7911	2.7466	3.6008
chr8:110569820-110570346	MLT1F1	3' exon	full	EBAG9	protein_coding	0	0	0	0	0.2952	0
chr3:32029923-32030509	MLT1F1	3' exon	full	ZNF860	protein_coding	0.0596	0.3699	0.2489	0.3807	0.0102	0
chr6:52443989-52444520	MLT1F1	3' exon	full	TRAM2-AS1	lincRNA	0	0	0.5518	0.0812	0	0
chr19:6436107-6436518	MLT1F1	3' exon	full	SLC25A23	protein_coding	0	2.5958	2.5049	0.1084	0	12.3477
chrX:33960110-33960392	MLT1F1	3' exon	full	RP11-305F18.1	lincRNA	0	0.7597	0	0.6276	0	0
chr15:65526848-65527185	MLT1F1	3' exon	partial	PARP16	protein_coding	0	0	0	0	0.0766	2.2192
chr13:48354622-48355146	MLT1F1	3' exon	partial	RP11-279N8.1	lincRNA	2.1704	2.5424	2.1294	1.0424	0.298	0.0087
chr4:57214719-57215147	MLT1F1	3' exon	partial	AASDH	protein_coding	0.1084	0.6914	0	0.0084	0.9106	1.0429
chr14:57741776-57742384	MLT1F1	3' exon	partial	AP5M1	protein_coding	0.0722	0.2867	0.7033	0.4046	1.5548	1.7726
chr6:161623137-161623618	MLT1F1	3' exon	partial	AGPAT4	protein_coding	2.4366	0.3092	1.3182	0.2891	0.6181	0
chr4:146257028-146257275	MLT1F1	3' exon	partial	RP11-142A22.4	lincRNA	0	0	0	0	0.377	1.6516
chr18:44933466-44933635	MLT1F1	3' exon	partial	CTD-2130O13.1	lincRNA	0.0717	6.6587	3.8558	0.0502	4.0376	0
chr14:61220130-61220459	MLT1F1	3' exon	partial	MNAT1	protein_coding	0.0169	0.4371	0.0323	0	0	0.8891
chr16:2990098-2990301	MLT1F1	3' exon	partial	FLYWCH1	protein_coding	0	0	0	0	0.9778	0.1135
chr17:4133040-4133276	MLT1F1	3' exon	partial	ANKFY1	protein_coding	0	0	0.5007	0	0	0.0872
chr17:5792236-5792750	MLT1F1	3' exon	partial	WSCD1	protein_coding	6.3464	1.1326	0.6686	0.1757	0	0
chr12:1129648-1130072	MLT1F1	internal exon	partial	ERC1	protein_coding	0.0668	0	0	0	0.9572	0.0701
chr10:72184667-72185186	MLT1F1	tagging	partial	EIF4EBP2	protein_coding	0.0118	0.1273	0.1597	0.1672	0.7641	2.3694
chr1:233104697-233105041	MLT1F1	tagging	partial	NTPCR	protein_coding	0	0.0888	0.0426	0.0493	0.0351	0.6247
chr16:46692783-46693342	MLT1F1	tagging	partial	VPS35	protein_coding	2.4373	2.5578	2.1807	1.3494	0.8201	2.1367
chr19:50336905-50337057	MLT1F1	tagging	partial	MED25	protein_coding	1.0747	2.298	1.5629	2.9981	0.1317	0.3553
chr19:50337040-50337152	MLT1F1	tagging	partial	MED25	protein_coding	1.0747	2.298	1.5629	2.9981	0.1317	0.3553
chr12:124070487-124070610	MLT1F1	tagging	partial	TMED2	protein_coding	0	0.4144	0.5881	1.1941	3.7603	0.4513
chr8:86572369-86572456	MLT1F1	tagging	partial	REXO1L1P	protein_coding	0	0.0075	0.0572	0.0217	0.0179	0
chr15:78463997-78464136	MLT1F1	tagging	partial	IDH3A	protein_coding	0.8592	2.5011	1.4174	1.0364	1.4249	2.9227
chr15:60712074-60712156	MLT1F1	tagging	partial	NARG2	protein_coding	5.2546	2.6248	3.1339	1.5696	0.2809	1.3096
chr7:154756670-154757161	MLT1F1	tagging	partial	PAXIP1	protein_coding	0.2103	0.534	0.8136	0.3577	0.0011	0.1682
chr15:60712156-60712315	MLT1F1	tagging	partial	NARG2	protein_coding	5.2546	2.6248	3.1339	1.5696	0.2809	1.3096
chr20:56082552-56082928	MLT1F1	tagging	partial	CTCFL	protein_coding	0	0.1839	1.1906	0.0091	0.0022	0
chr2:135224773-135224910	MLT1F1	tagging	partial	TMEM163	protein_coding	0.0156	0.2419	0.2016	0.0377	0.109	0
chr20:56082130-56082250	MLT1F1	tagging	partial	CTCFL	protein_coding	0	0.1839	1.1906	0.0091	0.0022	0
chr7:113715572-113716038	MLT1F2	5' exon	full	PPP1R3A	protein_coding	0	0	0	0	0.2443	0
chr8:126534955-126535317	MLT1F2	5' exon	full	RP11-136O12.2	lincRNA	0.4524	3.4689	3.9952	2.6224	1.6127	0.6595
chr12:1107422-1107903	MLT1F2	5' exon	full	ERC1	protein_coding	0.0423	0	0.0805	0	0.3321	0.0444
chr20:39962699-39962859	MLT1F2	5' exon	partial	ZHX3	protein_coding	0	0	0.5268	0	0	0
chr14:52474729-52475263	MLT1F2	5' exon	partial	NID2	protein_coding	2.0867	5.2064	3.8419	7.6763	1.5028	0.2888
chr14:73930015-73930537	MLT1F2	5' exon	partial	NUMB	protein_coding	0	0	0	0	1.107	0
chr18:55291165-55291245	MLT1F2	5' exon	partial	NARS	protein_coding	0	0.0639	0.6601	0	0	0
chr18:12976137-12976462	MLT1F2	5' exon	partial	SEH1L	protein_coding	0.2431	0.3609	0.438	0.5017	1.2601	0.3128
chr15:69220288-69220515	MLT1F2	5' exon	partial	SPESP1	protein_coding	0.6129	0.3954	0.2269	4.9365	2.0108	0
chr1:220327555-220328045	MLT1F2	5' exon	partial	RAB3GAP2	protein_coding	4.8161	2.63	3.3049	5.68	1.4372	1.0545
chr11:46884374-46884919	MLT1F2	5' exon	partial	LRP4	protein_coding	0	0	0	0	0.2977	0.0218
chr13:95351827-95352333	MLT1F2	3' exon	full	LINC00391	lincRNA	0	0	0	0	0	0.4377
chr5:12888049-12888589	MLT1F2	3' exon	full	RP11-419C19.2	lincRNA	9.1747	13.2067	13.6479	1.7924	7.248	0.8879
chr8:127950551-127951156	MLT1F2	3' exon	full	PCAT1	lincRNA	26.2514	11.0222	10.9626	2.4281	2.4937	0
chr3:56328242-56328822	MLT1F2	3' exon	full	ERC2	protein_coding	0.5959	0.3844	0.4052	0.0596	0.0726	0
chr14:34454321-34454949	MLT1F2	3' exon	full	EGLN3	protein_coding	0	0	0	0	0	0
chr17:74777042-74777546	MLT1F2	3' exon	full	MFSD11	protein_coding	0	0	0	0	0.0568	0
chrX:6054299-6054811	MLT1F2	3' exon	full	NLGN4X	protein_coding	0	0	0.5918	0	0	0
chr7:130557082-130557709	MLT1F2	3' exon	full	MIR29A	lincRNA	0	0.0511	0.8104	0	0	0
chr10:120433638-120434168	MLT1F2	3' exon	full	CACUL1	protein_coding	0	0.2092	0	0	0.3954	1.6048
chr4:56318218-56318768	MLT1F2	3' exon	full	TMEM165	protein_coding	0	0	0	0	0.951	0.0975
chr8:76032607-76033138	MLT1F2	3' exon	full	CASC9	lincRNA	0	0	0.5874	0	0.0078	0.1679
chr17:70034468-70035049	MLT1F2	3' exon	full	LINC01152	lincRNA	5.268	56.9202	21.9156	10.2117	10.3418	0
chr15:83813041-83813643	MLT1F2	3' exon	full	TM6SF1	protein_coding	0	0	0	0	0.0838	0
chr14:29437073-29437648	MLT1F2	3' exon	full	CTD-2384A14.1	lincRNA	0	0.7138	0	0	0	2.6584
chr9:129841655-129842180	MLT1F2	3' exon	full	RALGPS1	protein_coding	0	0	0	0	0.4043	0
chr10:56624267-56624757	MLT1F2	3' exon	full	PCDH15	protein_coding	1.3843	0.7143	5.5872	9.0738	0	0
chr5:13102393-13102958	MLT1F2	3' exon	partial	RP11-419C19.2	lincRNA	1.9027	2.8637	1.5957	2.3478	0.2113	0.0476
chr11:28841977-28842510	MLT1F2	3' exon	partial	RP11-115J23.1	lincRNA	0.2758	0.589	0.9508	0	0.0065	0
chr18:63114163-63114733	MLT1F2	3' exon	partial	RP11-453M23.1	lincRNA	0	0	0	0	0.9273	0
chr5:150241451-150242004	MLT1F2	3' exon	partial	IRGM	protein_coding	0	1.385	1.8907	0.2866	0.6184	0
chr4:2228723-2229243	MLT1F2	3' exon	partial	HAUS3	protein_coding	0	0	0	0	0	0.546
chr16:78607707-78608302	MLT1F2	3' exon	partial	WWOX	protein_coding	0	0.7012	0.6664	1.9378	0.059	0
chr2:216741906-216742423	MLT1F2	3' exon	partial	LINC00607	lincRNA	2.1206	0.9698	2.275	1.3436	0	0
chr2:67153032-67153530	MLT1F2	3' exon	partial	AC007403.2	lincRNA	0.4837	1.6012	1.0058	0.4859	0.063	0
chr13:69865530-69866035	MLT1F2	3' exon	partial	LINC00383	lincRNA	6.6939	1.0086	4.6617	0.8934	0	0
chr2:237372340-237372870	MLT1F2	3' exon	partial	IQCA1	protein_coding	0.0044	3.1002	2.4338	2.245	0.0913	0
chr3:173783340-173783839	MLT1F2	3' exon	partial	NLGN1	protein_coding	0	0.0439	0.5187	0	0.0523	0
chr8:95756275-95756810	MLT1F2	3' exon	partial	DPY19L4	protein_coding	0.85	0.2056	0.2731	0.4688	0	1.4052
chr17:67621571-67622104	MLT1F2	3' exon	partial	MAP2K6	protein_coding	1.1343	3.4915	1.139	0.6838	1.0749	0.2562
chr14:20782297-20782569	MLT1F2	3' exon	partial	CCNB1IP1	protein_coding	0	0	0	0.0109	0.5719	0.2605
chr2:87229938-87230386	MLT1F2	3' exon	partial	PLGLB1	protein_coding	0	0	0	0	0.0427	0.0716
chrX:54200226-54200825	MLT1F2	3' exon	partial	FAM120C	protein_coding	0.1522	1.3989	0.1992	2.3448	0.7792	1.6374
chr8:74652099-74652547	MLT1F2	internal exon	partial	STAU2	protein_coding	0.2411	0.933	2.1228	1.3507	0	0.5061
chr5:43116330-43116862	MLT1F2	internal exon	partial	ZNF131	protein_coding	0	0	0	0	0.1895	0
chr11:112107943-112108361	MLT1F2	internal exon	partial	PTS	protein_coding	0	0.8135	0	0	0	0
chr21:30622780-30623369	MLT1F2	internal exon	partial	BACH1	protein_coding	0	0	1.7724	0	0	0
chr4:14766435-14766946	MLT1F2	internal exon	partial	LINC00504	lincRNA	4.9085	4.5116	8.9364	3.3086	0.2723	0
chr1:61061699-61062284	MLT1F2	internal exon	partial	RP11-776H12.1	lincRNA	0.4481	0	0	0	0	0.0684
chr11:82067330-82067873	MLT1F2	internal exon	partial	RP11-179A16.1	lincRNA	0	2.5531	0.8866	3.4651	0.0397	0.1833
chr2:172446936-172447482	MLT1F2	internal exon	partial	DYNC1I2	protein_coding	1.282	1.7572	4.7798	1.4028	0	0
chr2:29001122-29001635	MLT1F2	internal exon	partial	SPDYA	protein_coding	0	0	0	0	0	0
chr9:71157117-71157609	MLT1F2	internal exon	partial	RP11-274B18.4	lincRNA	2.8784	1.8566	1.5413	1.2059	2.1843	0
chr15:61798978-61799501	MLT1F2	internal exon	partial	RP11-507B12.2	lincRNA	0.6486	2.6497	2.264	0	0.4428	0
chr8:125220292-125220773	MLT1F2	internal exon	partial	RP11-37N22.1	lincRNA	0	0	0	0	0	0
chr2:67793474-67793996	MLT1F2	internal exon	partial	AC007422.1	lincRNA	0	0	0	0.5811	0	0
chr3:127314447-127314926	MLT1F2	internal exon	partial	TPRA1	protein_coding	0	0	0	0	0.5058	0
chr9:84588780-84589354	MLT1F2	internal exon	partial	RP11-383M4.6	lincRNA	0	0	0	0	0	0.7684
chr15:24792477-24792618	MLT1F2	internal exon	partial	PWRN1	lincRNA	0	0	0.7769	3.5673	0.4131	0.2363
chr11:13007665-13007885	MLT1F2	internal exon	partial	LINC00958	lincRNA	0	0	0	0.2271	4.4944	0.2042
chr2:145428832-145429419	MLT1F2	internal exon	partial	TEX41	lincRNA	2.2702	6.4151	14.0985	16.5042	1.476	0
chrX:12940895-12940951	MLT1F2	tagging	partial	TLR8	protein_coding	0	0	0	0.0023	0	0.0087
chr20:10384341-10384432	MLT1F2	tagging	partial	MKKS	protein_coding	0.0873	0.0545	0.0208	0	0.3016	1.8166
chr19:58941254-58941793	MLT1F2	tagging	partial	CTD-2619J13.17	lincRNA	0.0135	0.3351	0.0644	0.0057	0.4415	0
chr12:92876499-92876708	MLT1F2	tagging	partial	RP11-693J15.5	lincRNA	0	0	0	0.0114	0.1701	0
chr2:199747421-199747677	MLT1F2	tagging	partial	AC018717.1	lincRNA	3.4466	0.5158	1.1287	0.8014	0	0
chr12:92877090-92877234	MLT1F2	tagging	partial	RP11-693J15.5	lincRNA	0	0	0	0.0114	0.1701	0
chr1:118505781-118505923	MLT1F2	tagging	partial	WDR3	protein_coding	0.0141	0.0194	0	0.0007	2.8716	1.3162
chr20:10383526-10384028	MLT1F2	tagging	partial	MKKS	protein_coding	0.0873	0.0545	0.0208	0	0.3016	1.8166
chr1:16788717-16789248	MLT1F2	tagging	partial	RP4-798A10.2	lincRNA	0	0	0.0111	0.0143	0	0
chr16:76691333-76691764	MLT1F2	tagging	partial	CNTNAP4	protein_coding	0.015	0	0.0394	0.2476	0	0
chr16:78101160-78101429	MLT1F2	tagging	partial	CLEC3A	protein_coding	0.3356	5.0968	0.4764	0.1045	0.1286	0.0021
chr15:56990715-56991293	MLT1F2	tagging	partial	ZNF280D	protein_coding	0.5514	0.6132	0.6757	0.1066	0	0.1749
chr16:78100875-78100948	MLT1F2	tagging	partial	CLEC3A	protein_coding	0.3356	5.0968	0.4764	0.1045	0.1286	0.0021
chr2:42164313-42164441	MLT1F2	tagging	partial	C2orf91	protein_coding	0	0.046	0	0	0	0
chr5:13405590-13406121	MLT1F2	tagging	partial	RP11-419C19.2	lincRNA	1.8978	0.0839	1.0737	0.0076	0.211	0
chr19:41277615-41277816	MLT1F2	tagging	partial	MIA	protein_coding	0	0	0	0	0.4415	0
chrX:12940340-12940770	MLT1F2	tagging	partial	TLR8	protein_coding	0	0	0	0.0023	0	0.0087
chr19:35256086-35256254	MLT1F2	tagging	partial	ZNF599	protein_coding	0.598	0.3981	0.337	0	0.0049	0
chr19:55554012-55554127	MLT1F2	tagging	partial	GP6	protein_coding	0	0.0397	0.0366	0.2893	0.134	0.0269
chr2:239134480-239134975	MLT1F2	tagging	partial	AC016757.3	protein_coding	0.0958	0	0	0	0.0747	0
chr5:148382694-148383197	MLT1F2	tagging	partial	SH3TC2	protein_coding	0	0	0	0	0	0.0422
chr19:55554124-55554398	MLT1F2	tagging	partial	GP6	protein_coding	0	0.0397	0.0366	0.2893	0.134	0.0269
chr11:30065711-30065932	MLT1F2	tagging	partial	RP11-624D11.2	lincRNA	0.154	1.3024	1.4172	0.036	0.4264	0
chr19:36830240-36830795	MLT1F2	tagging	partial	ZFP14	protein_coding	0.2657	0.4252	0.2688	0.1852	0.0615	0.0965
chr1:110277100-110277124	MLT1F2	tagging	partial	GSTM3	protein_coding	3.9122	1.6769	1.5057	1.0385	1.8358	0.1192
chr16:78101556-78101714	MLT1F2	tagging	partial	CLEC3A	protein_coding	0.3356	5.0968	0.4764	0.1045	0.1286	0.0021
chr19:2736177-2736723	MLT1F2	tagging	partial	SLC39A3	protein_coding	0	0.0461	0	0.0017	2.3239	0.3029
chr5:10521945-10522491	MLT1G	5' exon	partial	RP11-1C1.5	protein_coding	0.1656	0	0	0	0.2049	0
chr3:158526402-158526885	MLT1G	5' exon	partial	MFSD1	protein_coding	0	0.215	0.1133	0	0.4471	0.15
chr5:175614274-175614786	MLT1G	3' exon	full	RP11-844P9.2	lincRNA	0.7021	0.2264	0.6684	0	0	0
chr3:147987571-147988149	MLT1G	3' exon	full	RP11-501O2.4	lincRNA	0	1.3757	1.0151	1.0555	0.4465	0
chr11:200478-201026	MLT1G	3' exon	partial	BET1L	protein_coding	4.339	2.2319	4.2873	1.1732	1.4529	3.3726
chr2:2835959-2836458	MLT1G	3' exon	partial	AC011995.1	lincRNA	0.2059	2.5497	1.3092	0.7613	0	0
chr7:3145482-3145978	MLT1G	3' exon	partial	AC091801.1	protein_coding	3.959	3.1608	6.4503	5.2543	7.0827	0
chr11:12080066-12080327	MLT1G	3' exon	partial	RP13-631K18.2	lincRNA	0.0377	0.5403	0.4825	0.1041	0.0029	0
chr15:100846393-100846911	MLT1G	3' exon	partial	ADAMTS17	protein_coding	1.0857	4.1001	1.3718	1.8456	0.1887	0.0104
chr2:227673023-227673623	MLT1G	internal exon	partial	RP11-395N3.2	lincRNA	0	0	0	0	1.0456	0.0287
chr2:182127466-182127891	MLT1G	internal exon	partial	AC104820.2	lincRNA	0	0.6486	0	0	0	0
chr1:95440276-95440569	MLT1G	tagging	partial	ALG14	protein_coding	0.0314	0.002	0.0066	0	0.0684	1.1253
chr11:33764346-33764803	MLT1G	tagging	partial	FBXO3	protein_coding	0.4382	0.5128	0.7089	0.4735	0.0845	0.7266
chr16:89727462-89727541	MLT1G	tagging	partial	SPATA33	protein_coding	0	0	0	0	9.1023	0.1762
chr16:89727234-89727332	MLT1G	tagging	partial	SPATA33	protein_coding	0	0	0	0	9.1023	0.1762
chr8:2554364-2554467	MLT1G	tagging	partial	RP11-134O21.1	lincRNA	0.8166	0	0	0	0	0
chr11:65868033-65868578	MLT1G1	5' exon	full	PACS1	protein_coding	0	0	0	0	0	1.2127
chr3:191033706-191033975	MLT1G1	5' exon	partial	UTS2B	protein_coding	0.6855	2.5762	0.4256	0.8871	0.529	0.0626
chr15:88218540-88219033	MLT1G1	3' exon	full	RP11-648K4.2	lincRNA	3.4979	9.0249	3.9252	2.4659	3.574	0.8267
chr2:85128720-85129170	MLT1G1	3' exon	full	TRABD2A	protein_coding	0	0	0	0	0.3251	0.1515
chr11:80462521-80463000	MLT1G1	3' exon	partial	RP11-686G23.2	lincRNA	0.6044	0	0.4213	0	0	0
chr6:26990806-26991380	MLT1G1	3' exon	partial	LINC00240	lincRNA	0	0	0	0	0	0.6454
chr2:208764688-208765289	MLT1G1	3' exon	partial	PLEKHM3	protein_coding	0	0.0416	0	0	0.0055	0
chr2:152387149-152387440	MLT1G1	3' exon	partial	NEB	protein_coding	0	0	0.211	0	0	0
chr3:6258064-6258522	MLT1G1	3' exon	partial	AC026167.1	lincRNA	0.0886	0.2429	0.5376	0.0233	0.0718	0
chr3:41355218-41355695	MLT1G1	3' exon	partial	ULK4	protein_coding	1.1732	2.1031	1.0588	0	0	0
chr14:53793546-53794114	MLT1G1	3' exon	partial	AL163953.3	lincRNA	0	0	0.944	0	0	0
chr11:29252100-29252606	MLT1G1	3' exon	partial	RP11-466I1.1	lincRNA	0.3571	0.6252	0.6799	0	0	0
chr14:73875797-73876379	MLT1G1	3' exon	partial	NUMB	protein_coding	0.0252	0	0	0	2.9317	0.0927
chr6:2264161-2264383	MLT1G1	3' exon	partial	GMDS-AS1	lincRNA	0	0.0666	0	0	0.0793	0
chr4:139586041-139586565	MLT1G1	3' exon	partial	RP11-173E2.2	lincRNA	0	0.5093	0	0	0	0
chr10:95665974-95666303	MLT1G1	internal exon	partial	SLC35G1	protein_coding	0	0	0.1935	0	0.1041	1.1737
chr2:47448048-47448539	MLT1G1	internal exon	partial	AC073283.4	lincRNA	0.1322	0.0341	0	0	0.0993	0
chr2:53555853-53555880	MLT1G1	internal exon	partial	AC010967.2	lincRNA	0	0.191	1.198	0	0	0
chr4:150076363-150076907	MLT1G1	internal exon	partial	RP11-24I21.1	lincRNA	0.7208	0.7696	0	0	0	0
chr14:39939579-39939681	MLT1G1	internal exon	partial	RP11-111A21.1	lincRNA	0.1641	0	2.9682	0	0	1.7226
chr3:6223430-6223849	MLT1G1	internal exon	partial	AC026167.1	lincRNA	3.2634	9.8841	7.1586	4.8689	0.3874	0
chr15:37658889-37659214	MLT1G1	internal exon	partial	RP11-720L8.1	lincRNA	0.0572	0.3692	0.2179	0.0401	8.8103	0.4205
chr11:23213800-23214144	MLT1G1	internal exon	partial	RP11-266A24.1	lincRNA	0	1.6663	0.3353	2.0558	2.004	0
chr7:2754704-2754880	MLT1G1	tagging	partial	AMZ1	protein_coding	0.0016	0.0021	0.0062	0.0216	0.0349	0
chr16:11018772-11019169	MLT1G1	tagging	partial	CIITA	protein_coding	0	0	0	0	0.0008	0.0631
chr2:75155615-75156108	MLT1G1	tagging	partial	AC104135.3	lincRNA	0.0496	0.2211	0.1042	0.3717	0.1015	0.0043
chr2:233724250-233724809	MLT1G1	tagging	partial	C2orf82	protein_coding	0.0522	2.0205	1.2631	2.0664	0.7368	0.6009
chr15:89194336-89194432	MLT1G1	tagging	partial	ISG20	protein_coding	0.0025	0	0	0	0.2855	0.0159
chr15:81601498-81601935	MLT1G1	tagging	partial	STARD5	protein_coding	1.898	5.4731	10.6283	3.4403	1.029	0.1172
chr4:153540540-153541102	MLT1G1	tagging	partial	TMEM154	protein_coding	0.0034	1.4404	1.3495	0.7637	0.0358	0.0108
chr7:2754227-2754387	MLT1G1	tagging	partial	AMZ1	protein_coding	0.0016	0.0021	0.0062	0.0216	0.0349	0
chr15:89193721-89193999	MLT1G1	tagging	partial	ISG20	protein_coding	0.0025	0	0	0	0.2855	0.0159
chr10:22497047-22497100	MLT1G1	tagging	partial	EBLN1	protein_coding	183.621	114.635	58.2262	9.3235	4.4106	0.1101
chr15:81270251-81270358	MLT1G1	tagging	partial	MESDC2	protein_coding	0.0439	0.2572	0.477	0.4175	5.6438	1.4896
chr11:41736002-41736149	MLT1G1	tagging	partial	RP11-375D13.2	lincRNA	1.8918	5.8572	2.7014	0.1325	0	0
chr15:81268631-81268885	MLT1G1	tagging	partial	MESDC2	protein_coding	0.0439	0.2572	0.477	0.4175	5.6438	1.4896
chr2:23731033-23731474	MLT1G3	5' exon	full	AC011239.1	protein_coding	1.0789	0.261	0.7703	0	0.1151	0
chr11:89322466-89322907	MLT1G3	5' exon	full	NOX4	protein_coding	0.4356	0.1022	0.4146	0.0555	0	0
chr5:117881512-117882046	MLT1G3	3' exon	full	CTD-2281M20.1	lincRNA	0.6997	0.9628	3.6413	5.7333	0.4697	0
chr12:74679602-74679802	MLT1G3	3' exon	partial	RP11-81H3.2	lincRNA	2.0514	4.2341	4.2701	1.8772	3.4824	0.2871
chr12:74679437-74679575	MLT1G3	3' exon	partial	RP11-81H3.2	lincRNA	2.0514	4.2341	4.2701	1.8772	3.4824	0.2871
chr16:86279702-86279987	MLT1G3	3' exon	partial	LINC01081	lincRNA	0.2009	0	2.0655	0	0	0
chr5:13352934-13353486	MLT1G3	3' exon	partial	RP11-419C19.2	lincRNA	1.5025	2.8924	1.8581	2.629	2.5356	0
chr3:155836049-155836338	MLT1G3	internal exon	partial	KCNAB1	protein_coding	3.5372	8.7858	5.6289	3.8083	1.0812	0.4987
chr3:155835864-155836038	MLT1G3	internal exon	partial	KCNAB1	protein_coding	3.5372	8.7858	5.6289	3.8083	1.0812	0.4987
chr2:7215177-7215515	MLT1G3	internal exon	partial	RNF144A	protein_coding	0.6121	0.6029	0.5191	0.7404	0.0152	0
chr3:177918085-177918600	MLT1G3	internal exon	partial	RP11-33A14.1	lincRNA	3.705	6.3686	8.5602	3.9482	0.4585	0.0034
chr18:62217301-62217640	MLT1G3	internal exon	partial	RP11-146N18.1	lincRNA	0	0	4.1257	0	0	0
chr8:123428569-123429067	MLT1G3	internal exon	partial	RP11-94A24.1	lincRNA	0.3784	0.2219	1.9319	3.1074	0.047	0
chr2:11267866-11268222	MLT1G3	internal exon	partial	AC062028.1	lincRNA	0	4.4774	2.5559	0.0459	0	0
chr15:40215099-40215300	MLT1G3	tagging	partial	RP11-325N19.3	lincRNA	0	0.0438	0.0175	0	0.073	0
chr11:124567083-124567155	MLT1G3	tagging	partial	SPA17	protein_coding	0.0529	0.224	0.2722	0.0237	0.0549	0.7802
[truncated: 1,709 more rows]
