# Supplementary material for: Long terminal repeats power evolution of genes and gene expression programs in mammalian oocytes and zygotes
Source: HighWire-hosted journal article supplement (doi:10.1101/gr.216150.116), 2017-05-18
Supplement: Supplemental_Table_S8.xlsx [file Supplemental_Table_S8.xlsx]

## Sheet: Sheet 1
Franke et al. Table S8 - Recycled mouse pseudogenes
LTR	LTR position	gene_id	retrogene origin	retrogene coordinates	retrogene orientation	protein-coding potential (predicted)
MLT1A	chr2:4822655-4822796:+	TCONS_00055556	Prc1	chr2:4833100-4833157:-	antisense	non-coding
MLT1A0	chr17:12834735-12834883:-	TCONS_00047086	Rangap1	chr17:12819403-12819541:+	antisense	non-coding
MLT1B	chr16:95528916-95529111:+	Erg	Etv5	chr16:95361075-95361328:-	sense	protein_coding
MLT1E3	chr8:110438487-110438669:-	TCONS_00098414	Rpl31	chr8:110447089-110447149:+	sense	non-coding
MLT2B4	chr2:19973386-19973500:-	TCONS_00059697	Nab1	chr2:19964063-19964141:-	sense	protein_coding
MLT2C1	chrX:71984715-71985071:-	Fate1	Cnga4	chrX:72008113-72008154:+	sense	protein_coding
MT2B1	chr3:93068549-93069072:+	Gm4858	Spopl	chr3:93073539-93073951:+	sense	protein_coding
MT2B1	chr13:120153433-120153612:+	Gm20767	AF067063	chr13:120154596-120154609:+	sense	non-coding
MT2B1	chr13:120153783-120154099:+	Gm20767	AF067063	chr13:120154596-120154609:+	sense	non-coding
MT2B1	chr3:93676066-93676577:-	Tdpoz1	Spop	chr3:93669452-93669469:-	sense	protein_coding
MT2B1	chr3:94178057-94178347:-	Gm10696	Spop	chr3:94175101-94175118:-	sense	protein_coding
MT2B1	chr3:94054641-94055151:-	Gm9125	Spop	chr3:94049053-94049346:-	sense	protein_coding
MT2B2	chr7:39446982-39447541:-	Gm5590	Fam32a	chr7:39446088-39446183:-	sense	non-coding
MT2B2	chr7:21190182-21190760:-	Gm5157	Rps6ka4	chr7:21184949-21185010:-	sense	protein_coding
MT2B2	chr7:20730395-20730960:-	Gm10668	Mark2	chr7:20725193-20725471:-	sense	protein_coding
MT2B2	chr6:99935045-99935603:+	Tpt1-ps3	Tpt1	chr6:99877619-99878432:-	sense	non-coding
MT2B2	chr7:22719481-22720046:-	Gm4567	Mark2	chr7:22714279-22714557:-	sense	protein_coding
MT2B2	chr7:23278671-23279237:-	Gm6902	Mark2	chr7:23273469-23273747:-	sense	protein_coding
MT2C_Mm	chr9:18404622-18404838:+	Ubtfl1	Ubtf	chr9:18409177-18409429:+	sense	protein_coding
MT2C_Mm	chr11:60687410-60687880:-	lncRNA-OET-11-038	Uba52	chr11:60619397-60619458:-	sense	non-coding
MT2C_Mm	chr10:19284771-19284961:-	TCONS_00011498	Eno1	chr10:19261875-19261898:+	antisense	non-coding
MT2C_Mm	chr6:136327258-136327726:+	Gm8994	Eif4a3	chr6:136328521-136329833:+	sense	protein_coding
MT2C_Mm	chr11:60566414-60566887:-	lncRNA-OET-11-037	Uba52	chr11:60560864-60560904:-	sense	non-coding
MT2C_Mm	chr9:18402857-18403242:-	Naalad2	Ubtf	chr9:18402524-18402618:+	antisense	non-coding
MT2C_Mm	chr4:101986552-101987025:+	Gm12789	Pramel7	chr4:101988130-101988423:+	sense	protein_coding
MT2_Mm	chr13:91254120-91254613:+	lncRNA-OET-13-064	Hnrnpk	chr13:91261905-91262422:-	antisense	non-coding
MTA_Mm	chr3:65519315-65519709:-	4931440P22Rik	Rpl29	chr3:65508578-65508591:-	sense	non-coding
MTA_Mm	chr2:132696045-132696443:-	lncRNA-OET-02-450	Armc1	chr2:132694709-132694724:-	sense	non-coding
MTA_Mm	chr10:9684340-9684737:-	TCONS_00011327	Gpd1l	chr10:9683813-9683851:+	antisense	protein_coding
MTA_Mm	chr6:8535725-8536118:+	Glcci1	Fbxo5	chr6:8595312-8595324:-	antisense	non-coding
MTA_Mm	chr5:42440264-42440659:+	lncRNA-OET-05-287	Ube2v1	chr5:42499216-42499290:-	antisense	non-coding
MTA_Mm	chr12:88068663-88069054:-	TCONS_00025307	H3f3a	chr12:88064003-88064033:-	sense	non-coding
MTA_Mm	chr10:15796341-15796741:-	lncRNA-OET-10-266	Rpl7a	chr10:15783165-15783209:-	sense	non-coding
MTA_Mm	chr19:39255919-39256300:+	Cyp2c29	Cyp2c55	chr19:39274479-39274696:+	sense	non-coding
MTA_Mm	chr19:39269200-39269581:+	Cyp2c53-ps	Cyp2c55	chr19:39274479-39274696:+	sense	non-coding
MTA_Mm	chr10:44215214-44215594:+	Speer5-ps1	Speer5	chr10:44219058-44219118:+	sense	protein_coding
MTA_Mm	chr5:149657165-149657566:+	lncRNA-OET-05-408	Nme2	chr5:149660648-149661278:-	antisense	non-coding
MTB	chr14:26932064-26932244:-	Appl1	Snw1	chr14:26919481-26919509:+	antisense	non-coding
MTB	chr14:26932362-26932556:-	Appl1	Snw1	chr14:26919481-26919509:+	antisense	non-coding
MTB	chr10:12846559-12846951:-	TCONS_00011389	Cfl1	chr10:12846014-12846073:+	antisense	non-coding
MTB	chr12:116455612-116455996:+	Ncapg2	Naa50	chr12:116461699-116461744:+	sense	non-coding
MTB	chr3:139123623-139124039:+	TCONS_00065942	Nme2	chr3:139128216-139128397:-	antisense	non-coding
MTB	chr7:115154934-115155318:+	TCONS_00091862	Rpl19	chr7:115171984-115172055:+	sense	non-coding
MTB	chr5:110120708-110121105:-	Gm15484	Npm1	chr5:110117711-110117779:-	sense	non-coding
MTB_Mm	chr10:18327316-18327719:+	TCONS_00008335	Mtfr2	chr10:18335653-18336107:-	antisense	non-coding
MTB_Mm	chr8:116491479-116491827:-	TCONS_00101613	Ndc80	chr8:116489571-116489787:+	antisense	non-coding
MTB_Mm	chrX:13229281-13229645:-	TCONS_00110744	Llph	chrX:13217917-13218655:-	sense	protein_coding
MTB_Mm	chr5:103301832-103302238:-	4930429D17Rik	Rplp1	chr5:103286977-103287105:+	antisense	non-coding
MTB_Mm	chr8:99127158-99127558:+	TCONS_00098034	Ppp4r1	chr8:99144544-99144624:-	antisense	non-coding
MTC	chr8:31367550-31367944:+	TCONS_00096724	Dlgap5	chr8:31380777-31380948:-	antisense	non-coding
MTC	chr6:30076123-30076466:+	Nrf1	Atp5j2	chr6:30140463-30140483:+	sense	non-coding
MTC	chr11:83067486-83067847:+	TCONS_00019668	Set	chr11:83062951-83062994:-	sense	non-coding
MTC	chr17:9282892-9283284:+	TCONS_00044759	Gapdh	chr17:9320196-9320327:-	antisense	non-coding
MTC	chr15:96079282-96079648:-	D030018L15Rik	Ncoa2	chr15:96073115-96073185:+	antisense	non-coding
MTC	chrX:7952027-7952353:+	Gm14820	Rps29	chrX:8047158-8047170:+	sense	non-coding
MTC	chr5:129642839-129643229:-	TCONS_00082973	Sgol2a	chr5:129634285-129634320:+	antisense	non-coding
MTC	chr17:6117178-6117445:+	Tulp4	Fbl	chr17:6121094-6122053:-	antisense	non-coding
MTC	chr10:75483359-75483572:+	TCONS_00009542	Ache	chr10:75481028-75481097:-	antisense	non-coding
MTC	chr9:75371221-75371610:+	TCONS_00103678	Zar1l	chr9:75372792-75372954:-	antisense	non-coding
MTD	chr13:57127453-57127817:+	TCONS_00027303	Hmgb1	chr13:57175645-57175669:+	sense	non-coding
MTD	chr5:65903211-65903560:+	TCONS_00077598	Haus8	chr5:65911170-65911210:-	antisense	non-coding
MTD	chr9:55325151-55325330:-	Nrg4	Serbp1	chr9:55306163-55306263:+	antisense	non-coding
MTD	chr14:105190933-105191343:+	TCONS_00033623	Lcp1	chr14:105199323-105199623:-	antisense	non-coding
MTD	chr14:79247163-79247528:-	TCONS_00035657	Tbrg6	chr14:79212392-79212411:-	sense	protein_coding
MTE2b	chr5:137705392-137705551:-	TCONS_00079622	Sp110	chr5:137720355-137720575:-	antisense	non-coding
ORR1A1	chr10:88664125-88664474:-	lncRNA-OET-10-142	Gapdh	chr10:88658073-88658127:-	sense	non-coding
ORR1A2	chr10:117599922-117600206:-	lncRNA-OET-10-412	Kifc1	chr10:117595281-117595729:+	antisense	non-coding
ORR1A2	chr13:120200367-120200652:-	TCONS_00031467	Kifc1	chr13:120194353-120194366:+	antisense	non-coding
ORR1A2	chr9:18404306-18404619:+	Ubtfl1	Ubtf	chr9:18409177-18409429:+	sense	protein_coding
ORR1A2	chr9:65496479-65496818:+	TCONS_00103366	Cops7a	chr9:65497256-65497288:+	sense	non-coding
ORR1B1	chr12:87618737-87618892:+	Gm4027	Eif1ax	chr12:87621529-87621578:+	sense	protein_coding
ORR1B1	chr12:17589176-17589537:-	TCONS_00023898	Dlgap5	chr12:17568478-17568528:-	sense	non-coding
ORR1B2	chr10:121747838-121748202:-	TCONS_00010792	Npm2	chr10:121752888-121752920:-	antisense	protein_coding
ORR1B2	chr4:40776412-40776754:-	Gm12396	Psenen	chr4:40775130-40775757:-	sense	non-coding
ORR1E	chr6:50631697-50631993:-	RP24-238J9.2	Crnkl1	chr6:50619673-50619780:-	sense	non-coding
ORR1F	chr15:37387422-37387778:+	mm.5652.2	Ncs1	chr15:37397061-37397377:-	antisense	non-coding
ORR1F	chr16:95527892-95528214:+	Erg	Etv5	chr16:95361075-95361328:-	sense	protein_coding
RMER15	chr16:78294744-78295348:-	TCONS_00044052	Hdac1	chr16:78251037-78251071:+	antisense	non-coding
